# Supplementary material for: Genome-wide association for heat tolerance at seedling stage in historical spring wheat cultivars
Source: Front Plant Sci. 2022 Aug 25;13:972481. doi: 10.3389/fpls.2022.972481 (PMC9453861; doi:10.3389/fpls.2022.972481)
Supplement: Supplementary file 1 [file Table_1.XLSX]

## Sheet: Table S1
Table S1	Name and year of release of 195 cultivars used in this study
Variety name	Year
T-9	1918
T-11	NA
Dirk	NA
C-518	1933
C-591	1934
C-228	1941
C-217	1944
C-250	1944
C-271	1957
C-273	1957
Mexipak 65	1965
Khushal-69	1969
Chenab-70	1970
Barani-70	1970
Blue silver	1971
SA-42	1971
Lylpur-73	1973
Pari-73	1973
Parula-73	1973
Yacora	1975
LU-26	1976
Punjab-76	1976
WL-711	1978
Jauhar-78	1978
Zarghoon	1979
Pak-81	1981
Punjab-81	1981
Sindh-81	1983
Faisalabad-83	1983
Kohinoor-83	1983
Barani-83	1983
Faisalabad-85	1985
Sarsabz	1985
Tandojam-83	1985
Pirsbak-85	1985
Punjab-85	1985
Wadank-85	1985
Chakwal-86	1986
Rawal-87	1987
Khyber-87	1987
Sutluj-86	1987
Shalimar-88	1988
Zardana	1989
Mehran-89	1989
Rohtas-90	1990
Inqilab-91	1991
Pasban-90	1991
Soghat-90	1991
Bakhtawar-92	1992
Kaghan-93	1993
Anmol-91	1993
Shaheen-94	1994
Parwaz-94	1995
Shahkar-95	1995
Kohsar-95	1995
Kirin-95	1996
Nowshera-96	1996
Punjab-96	1996
Suleman-96	1996
Abadgar-93	1996
Soorab-96 (B)	1996
Tatara	1996
ARZI-96	1996
Punjab-96	1996
Bahawalpur-97	1997
MH-97	1997
Kohistan-97	1997
Fakhar-e-Sarhad-97	1997
Chakwal-97	1997
Durum-97	1997
Darawar-97	1997
Daman-98	1998
Dera-98	1998
Ghaznavi	1998
Zarlashata	1999
Magalla-99	1999
Bahalwalpur-2000	2000
Marvi-2000	2000
Takbeer	2000
Iqbal-2000	2000
Auqab-2000	2000
Amin-2000	2000
Saleem-2000	2000
Punjnad-1	2000
Khatakwal	2000
Raj	2000
Chenab-2000	2000
Waqaf-01	2001
SH-2002	2002
Bahkhar-2002	2002
AS-2002	2002
GA-2002	2002
Ufaq	2002
Manthar-2003	2003
KT-2000	2003
Pirsabak-2004	2004
Bhittai	2004
Zam-04	2004
TD-1	2004
Pirsabak-2005	2005
Rashkoh-2005	2005
Moomal-2002	2006
Sehar-2006	2006
Shafaq-2006	2006
Saussi	2006
Fareed-06	2006
SKD-1	2006
Imdad-05	2006
Khirman	2006
Chakwal-50	2008
Lasani-08	2008
Meraj-08	2008
Faisalabad-08	2008
Bathoor-08	2008
Gomal-08	2008
Hashim-08	2008
Pirsabak-2008	2008
NARC-2009	2009
BARS-2009	2009
AARI-2010	2010
NIFA-Barsat 10	2010
Nia-Amber	2010
Nia-Sunehri	2010
Janbaz	2010
Tijban-10	2010
Atta Habib	2010
Seren	2010
KT-2010	2010
Aas-2011	2011
Punjab-2011	2011
Millat-2011	2011
Dharrabi-11	2011
NARC-2011	2011
Nia-Sunder	2011
Nia-Sarang	2011
Benazir-13	2013
Shahkar-13	2013
Pirsbak-13	2013
Hamal-Faqir	2013
Pakistan-2013	2013
NIFA-Lilma	2013
Galaxy-2013	2013
Shalakot-13	2013
Umeed-2014	2014
Pakhtunkhawa	2015
Pirsabak-15	2015
Ujala-15	2015
IBGE-GHane	2015
NIFA-Insaf	2015
Sindhu-16	2016
Zincol	2016
Borlogue-16	2016
NIFA-Aman	2016
Gold-16	2016
Johar-16	2016
Ihsan-16	2016
Fatehjang-16	2016
NN-Gandum	2016
Wardan-17	2017
Pasina-17	2017
Khaista-17	2017
Israr Shaheed	2017
Shahid-17	2017
Kohat-17	2017
Anaj-2017	2017
Fakhar-e-Bhakkar	2017
Barani-17	2017
Bhakkar Star	2019
Markaz-2019	2019
NIFA-Awaz	2019
Faheem-19	2019
Ghazi-2019	2019
NIA-zarkosz	NA
NIA-Shaheen	NA
Akber-19	2019
Gulzar	NA
Pirsbaq-19	2019
Aggaz	NA
Khoshur	NA
AZRC	NA
Umeed e Khas	NA
Pirsbaq-21	2021
Akbar-21	2021
Zargoun-21	2021
NARC	2021
SWB-1	2021
MA-2021	2021
Nisnan-21	2021
Subhani	2021
Dilkash	2021
MIH-21	2021
Nawab-21	2021
Saddiq-21	2021
Sarab-92	1992

## Sheet: Table S2
Table S2	Primers used in the study for identification of allelic variation at TaHST1-4A associated with heat stress tolerance in wheat
Primer	Sequence	Tm ⁰C	Product size (bp)
Xhau1-F	GGGAGTGTTTGTGTGAGGATTTG	65	825
Xhau1-R	GCACTACTACCAAACCACGTGTA
Xhau2-F	GGGAGCCAATTCGTGTGACT	56	426
Xhau2-R	CAAGCGCTATACAACTGTGCT
Xhau3-F	GCCCGTGAATCATACTTGAGCG	58	788
Xhau3-R	TGAGGAGATAATTGTACGCCGA
Xhau4-F	TCGGTTGGTTTGTTTATACTTGC	65	127 or 195
Xhau4-R	CCACGCTTGCACAATCTATTCT
Xhau5-F	TGCCTACCAAAGTGAGACCTG	60	259
Xhau5-R	ACCTACCTCTACCTCAACCCA

## Sheet: Table S3
Table S3	Genotypic data as HapMap file for all wheat cultivars used in this study.
rs#	alleles	chrom	pos	strand	assembly#	center	protLSID	assayLSID	panelLSID	QCcode	T-9	T-11	C-518	C-591	C-228	C-217	C-250	C-271	C-273	Mexipak-65	Chenab-70	Blue-silver	SA-42	Lylpur-73	Pari-73	LU-26	Punjab-76	WL-711	Jauhar-78	Zarghoon	Pak-81	Punjab-81	Faisalabad-83	Kohinoor-83	Barani-83	Faisalabad-85	Sarsabz-86	Punjab-85	Wdank-85	Chakwal-86	Rawal-87	Khyber-87	Shalimar-88	Zardana-89	Mehran-89	Rohtas-90	Inqilab-91	Pasban-90	Soghat-90
AX-94422082	G/T	1A	1179800	+	NA	NA	NA	NA	NA	NA	G	G	G	T	G	G	G	G	G	G	T	G	G	G	K	K	G	G	G	G	G	G	K	G	G	G	G	G	G	G	G	G	G	G	G	K	G	T	G
AX-86164189	T/C	1A	1193452	+	NA	NA	NA	NA	NA	NA	T	T	N	C	T	T	T	T	T	Y	C	T	T	T	Y	Y	T	T	T	T	T	T	Y	T	T	T	T	T	T	T	T	T	T	T	T	Y	T	C	T
AX-86179411	G/A	1A	1193476	+	NA	NA	NA	NA	NA	NA	G	G	G	A	G	G	G	G	G	G	A	G	G	G	R	R	G	G	G	G	G	G	R	G	G	G	G	G	G	G	G	G	G	G	G	R	G	A	G
AX-95217061	A/C	1A	1195204	+	NA	NA	NA	NA	NA	NA	M	A	A	M	A	A	A	A	A	A	M	A	A	A	C	N	M	A	A	A	A	A	C	M	A	A	A	M	M	A	M	A	A	A	A	C	A	M	A
AX-94493709	A/G	1A	1208214	+	NA	NA	NA	NA	NA	NA	R	G	R	A	R	R	G	G	G	A	A	G	G	G	A	A	A	A	A	A	A	A	A	A	A	A	G	A	R	A	A	A	A	A	A	A	G	A	A
AX-95651926	A/C	1A	1210602	+	NA	NA	NA	NA	NA	NA	C	C	C	A	C	C	C	C	C	A	A	C	C	C	A	N	A	A	A	A	A	A	A	A	A	A	C	A	C	A	A	A	A	A	A	A	C	A	A
AX-110012566	C/T	1A	1223990	+	NA	NA	NA	NA	NA	NA	T	T	T	C	T	T	T	T	T	C	C	T	T	T	C	Y	C	C	C	C	C	C	C	C	C	C	T	C	T	C	C	C	C	C	C	C	T	C	C
AX-179558625	A/C	1A	1243542	+	NA	NA	NA	NA	NA	NA	A	A	A	C	A	A	A	A	A	A	C	A	A	A	M	A	A	A	A	A	A	A	M	A	A	A	A	A	A	A	A	A	A	A	A	M	A	C	A
AX-94889872	T/C	1A	1244268	+	NA	NA	NA	NA	NA	NA	T	T	T	C	T	T	T	T	T	T	C	T	T	T	Y	T	T	T	T	T	T	T	Y	T	T	T	T	T	T	T	T	T	T	T	T	C	T	C	T
AX-86179001	G/A	1A	1244447	+	NA	NA	NA	NA	NA	NA	A	G	A	A	A	A	G	A	A	G	A	G	A	G	A	A	G	G	G	G	G	G	A	G	G	G	G	G	N	G	G	G	G	G	G	A	G	A	G
AX-86179145	G/A	1A	1244447	+	NA	NA	NA	NA	NA	NA	A	G	A	A	A	A	G	A	A	G	A	G	A	G	A	N	G	G	G	G	G	G	A	G	G	G	G	G	A	G	G	G	G	G	G	A	G	A	G
AX-94745699	T/C	1A	1267407	+	NA	NA	NA	NA	NA	NA	Y	Y	C	N	C	C	T	T	C	T	C	T	T	T	Y	Y	T	T	T	T	T	T	Y	T	T	T	C	T	Y	T	T	T	T	T	T	Y	T	C	T
AX-111687224	G/A	1A	1371443	+	NA	NA	NA	NA	NA	NA	A	R	G	A	A	A	G	A	A	G	A	G	A	R	A	A	R	G	R	R	G	R	A	N	G	G	G	R	A	G	R	G	G	R	G	A	G	A	R
AX-95652482	G/A	1A	1371443	+	NA	NA	NA	NA	NA	NA	A	G	G	A	A	A	G	A	A	G	A	G	A	G	A	A	G	G	G	G	G	G	N	G	G	G	G	G	A	G	G	G	G	G	G	A	G	A	G
AX-179475478	C/T	1A	1852768	+	NA	NA	NA	NA	NA	NA	C	C	C	T	C	C	C	C	C	C	T	C	C	C	T	Y	N	C	Y	C	C	Y	T	Y	Y	C	C	Y	C	Y	Y	Y	Y	Y	C	T	C	T	N
AX-94464427	C/T	1A	1852768	+	NA	NA	NA	NA	NA	NA	C	C	C	T	C	C	C	C	C	C	T	C	C	C	T	Y	N	C	N	C	C	N	T	N	N	C	C	N	C	N	N	N	N	N	C	T	C	T	N
AX-94531520	T/C	1A	2342608	+	NA	NA	NA	NA	NA	NA	C	Y	C	T	C	C	T	C	C	T	T	T	C	T	Y	N	C	T	C	T	T	C	Y	C	C	T	C	C	N	C	C	C	C	C	T	Y	T	T	C
AX-94730812	G/C	1A	4032353	+	NA	NA	NA	NA	NA	NA	G	G	G	C	G	G	C	G	G	C	C	C	G	S	S	G	G	C	G	S	C	G	S	G	G	C	G	G	G	G	G	G	G	G	C	S	C	C	G
AX-95142467	C/T	1A	4032548	+	NA	NA	NA	NA	NA	NA	C	N	C	T	Y	Y	C	C	Y	C	T	Y	Y	Y	Y	T	C	C	C	C	C	C	T	C	C	C	C	C	C	C	C	C	C	C	C	T	Y	T	C
AX-110999783	C/G	1A	4448997	+	NA	NA	NA	NA	NA	NA	C	C	C	C	C	C	G	C	C	G	C	G	C	G	C	C	C	G	C	G	G	C	C	C	C	G	C	C	C	C	C	C	C	C	G	C	G	C	C
AX-94581354	C/A	1A	4455803	+	NA	NA	NA	NA	NA	NA	M	M	C	C	C	C	C	C	A	C	C	C	C	C	M	M	M	C	M	C	C	M	M	M	C	C	A	M	M	C	M	A	C	M	C	M	C	C	M
AX-94492529	A/T	1A	4564573	+	NA	NA	NA	NA	NA	NA	A	A	A	T	A	A	A	A	A	A	T	A	A	A	W	W	A	A	A	A	A	A	W	A	A	A	A	A	A	A	A	A	A	A	A	W	A	T	A
AX-111058036	A/G	1A	4675384	+	NA	NA	NA	NA	NA	NA	A	A	A	G	A	A	A	A	A	A	G	A	A	A	R	R	A	A	A	A	A	A	R	A	A	A	A	A	A	A	A	A	A	A	A	R	A	G	A
AX-94386458	C/A	1A	4690514	+	NA	NA	NA	NA	NA	NA	C	M	C	A	N	C	C	C	C	C	A	C	C	M	A	N	M	C	M	M	C	M	A	C	C	C	C	M	C	C	N	C	C	M	C	A	C	A	N
AX-109305919	G/T	1A	4744764	+	NA	NA	NA	NA	NA	NA	G	G	G	T	G	G	G	G	G	G	T	G	G	G	T	K	G	G	G	G	G	G	T	G	G	G	G	G	G	G	G	G	G	G	G	T	G	T	G
AX-111010650	G/A	1A	5626648	+	NA	NA	NA	NA	NA	NA	G	G	G	A	G	G	G	G	G	G	A	G	G	G	A	N	G	G	A	G	G	G	A	G	G	G	G	G	A	G	G	G	G	G	G	A	G	A	G
AX-86180188	T/G	1A	6290190	+	NA	NA	NA	NA	NA	NA	T	T	T	N	T	T	T	T	T	T	G	T	T	T	G	K	T	T	N	T	T	T	K	T	T	T	T	T	G	T	T	T	T	T	T	G	T	G	T
AX-86180189	T/G	1A	6290190	+	NA	NA	NA	NA	NA	NA	T	T	T	G	T	T	T	T	T	T	G	T	T	T	G	K	T	T	T	T	T	T	G	T	T	T	T	T	G	T	T	T	T	T	T	G	T	G	T
AX-95230167	G/A	1A	6294406	+	NA	NA	NA	NA	NA	NA	G	G	G	A	G	G	G	G	G	G	A	G	G	G	A	R	G	G	G	G	G	G	A	G	G	G	G	G	A	G	G	G	G	G	G	A	G	A	G
AX-94490662	T/C	1A	6471336	+	NA	NA	NA	NA	NA	NA	T	T	T	T	T	T	T	T	N	T	T	T	T	T	Y	Y	T	T	T	T	T	T	Y	T	T	T	T	T	N	T	T	T	T	T	T	Y	T	T	T
AX-179559571	T/C	1A	7885850	+	NA	NA	NA	NA	NA	NA	T	T	C	C	T	T	T	T	N	T	C	T	T	T	Y	T	T	T	T	T	T	T	T	T	T	T	T	T	T	T	T	T	T	T	T	Y	T	C	T
AX-86172714	G/A	1A	7888791	+	NA	NA	NA	NA	NA	NA	G	G	A	A	G	G	G	G	G	G	A	G	G	G	A	R	G	G	G	G	G	G	A	G	G	G	G	G	G	G	G	G	G	G	G	A	G	A	G
AX-86172715	G/A	1A	7888791	+	NA	NA	NA	NA	NA	NA	G	G	A	A	G	G	G	G	G	G	A	G	G	G	A	R	G	G	G	G	G	G	A	N	G	G	G	G	N	G	G	G	G	G	G	A	G	A	G
AX-95205045	C/T	1A	7966945	+	NA	NA	NA	NA	NA	NA	C	C	C	T	C	C	C	C	C	C	T	C	C	C	T	Y	C	C	C	C	C	C	T	N	C	C	Y	C	C	C	C	C	C	C	C	T	C	T	C
AX-179388397	G/A	1A	7968431	+	NA	NA	NA	NA	NA	NA	R	R	G	G	G	G	A	G	A	A	G	A	G	G	G	N	G	A	R	G	G	G	N	G	G	A	A	G	R	G	G	A	G	G	G	G	G	G	G
AX-95630149	G/A	1A	7968431	+	NA	NA	NA	NA	NA	NA	A	A	G	G	A	A	G	N	A	G	G	G	A	G	G	N	G	G	A	G	G	G	G	G	G	G	G	G	A	G	G	G	G	G	G	G	G	G	G
AX-108805925	C/T	1A	8002734	+	NA	NA	NA	NA	NA	NA	C	C	C	T	C	C	C	C	C	C	T	C	C	C	T	Y	C	C	C	C	C	C	N	C	C	C	C	C	C	C	C	C	C	C	C	T	C	T	C
AX-109357370	C/T	1A	8007561	+	NA	NA	NA	NA	NA	NA	C	C	T	T	C	C	C	C	C	C	T	C	C	C	T	Y	T	C	C	T	C	N	T	T	T	C	T	T	T	T	T	T	T	T	C	T	T	T	T
AX-109820251	T/C	1A	8037464	+	NA	NA	NA	NA	NA	NA	T	T	C	C	T	T	T	T	T	T	C	T	T	T	C	Y	C	T	T	C	T	C	C	C	C	T	C	C	C	C	C	C	C	C	T	C	C	C	C
AX-108949201	C/T	1A	8329873	+	NA	NA	NA	NA	NA	NA	C	C	C	Y	N	C	T	C	C	T	Y	C	C	T	Y	Y	C	T	C	N	T	C	Y	C	C	T	C	N	C	C	C	C	C	N	T	N	C	Y	C
AX-110558138	A/C	1A	8330707	+	NA	NA	NA	NA	NA	NA	C	C	A	A	A	C	C	A	N	C	A	A	A	C	M	N	M	C	N	N	A	M	N	N	A	C	A	N	M	A	M	A	A	M	A	N	A	A	M
AX-94748758	A/C	1A	8330707	+	NA	NA	NA	NA	NA	NA	C	C	A	A	A	C	C	A	C	C	A	A	A	C	N	C	N	C	C	A	A	N	M	A	A	C	A	A	M	A	N	A	A	N	A	A	A	A	N
AX-94600120	T/C	1A	8330972	+	NA	NA	NA	NA	NA	NA	T	T	T	C	T	T	T	T	T	T	C	C	T	T	Y	T	T	T	T	T	T	T	Y	T	T	T	T	T	T	T	T	T	T	T	T	Y	T	C	T
AX-94977486	G/T	1A	8364042	+	NA	NA	NA	NA	NA	NA	T	N	G	G	T	T	T	T	T	T	G	K	T	T	G	K	G	T	T	G	T	G	G	G	G	T	G	G	G	G	G	G	G	G	T	G	G	G	G
AX-109988105	G/T	1A	8369679	+	NA	NA	NA	NA	NA	NA	T	T	G	G	T	T	T	T	T	T	G	K	T	T	G	K	G	T	T	G	T	G	G	G	G	T	G	G	G	G	G	G	G	G	T	G	G	G	G
AX-109392212	A/G	1A	8704099	+	NA	NA	NA	NA	NA	NA	R	R	A	A	A	G	A	A	A	A	A	R	A	A	A	R	R	A	A	R	A	R	N	R	G	G	A	R	G	G	R	G	G	A	A	G	A	G	R
AX-95662408	A/G	1A	8902163	+	NA	NA	NA	NA	NA	NA	A	A	G	R	A	A	A	A	A	A	R	A	A	A	R	A	A	A	A	A	A	A	R	A	A	A	A	A	G	A	A	A	A	A	A	R	A	R	A
AX-179558496	G/A	1A	8956950	+	NA	NA	NA	NA	NA	NA	G	G	A	N	G	G	A	G	G	G	N	G	G	G	N	G	R	A	R	R	G	R	R	R	A	G	A	R	R	A	R	A	A	R	G	R	A	A	R
AX-95658304	A/G	1A	8956950	+	NA	NA	NA	NA	NA	NA	G	G	A	A	G	G	A	G	G	R	A	G	G	G	A	R	A	A	A	A	G	A	A	A	A	G	A	A	A	A	A	A	A	A	G	A	A	A	A
AX-95207086	G/A	1A	8957046	+	NA	NA	NA	NA	NA	NA	A	A	R	G	R	R	G	G	R	G	G	G	G	G	G	R	G	G	G	G	G	G	G	G	G	G	G	G	A	G	G	G	G	G	G	G	G	N	G
AX-89629592	A/G	1A	8989289	+	NA	NA	NA	NA	NA	NA	G	G	A	A	G	G	A	G	G	R	A	G	G	G	A	R	A	A	A	A	G	A	A	A	A	G	A	A	A	A	A	A	A	A	G	A	A	A	A
AX-95103738	G/A	1A	9310859	+	NA	NA	NA	NA	NA	NA	R	R	R	G	G	A	A	G	A	A	G	A	G	A	G	G	R	A	G	R	G	R	G	N	A	A	A	R	R	G	R	A	G	R	G	G	G	G	A
AX-94950558	C/T	1A	9905354	+	NA	NA	NA	NA	NA	NA	T	T	C	C	T	T	C	T	T	T	C	C	T	T	C	T	C	C	C	C	T	C	C	C	C	T	C	C	T	C	C	C	C	C	T	C	C	C	C
AX-94766336	G/A	1A	10051686	+	NA	NA	NA	NA	NA	NA	A	A	G	G	A	A	G	A	A	A	G	G	A	A	R	A	R	G	R	R	A	R	R	R	G	A	G	R	A	G	R	G	G	R	A	A	G	G	R
AX-94450466	C/T	1A	10170499	+	NA	NA	NA	NA	NA	NA	T	T	C	C	T	T	C	T	T	C	C	N	T	T	Y	N	Y	C	N	Y	T	Y	Y	Y	C	T	C	Y	T	C	Y	C	C	Y	T	T	C	C	Y
AX-179475552	G/A	1A	10237051	+	NA	NA	NA	NA	NA	NA	A	A	G	G	A	A	G	A	A	A	G	G	A	A	G	N	G	G	G	G	R	G	G	G	G	A	G	G	A	G	G	G	G	G	R	N	G	G	G
AX-95198429	T/C	1A	10237132	+	NA	NA	NA	NA	NA	NA	C	C	T	T	C	C	T	C	T	T	N	T	C	C	T	Y	T	T	T	T	T	T	T	T	T	T	T	T	N	T	T	T	T	T	T	C	T	T	T
AX-89375925	C/T	1A	10272821	+	NA	NA	NA	NA	NA	NA	C	C	T	C	C	C	T	C	C	Y	C	C	C	C	C	C	T	T	T	T	C	T	C	T	T	C	T	T	C	T	T	T	T	T	C	C	T	C	T
AX-95652724	T/C	1A	10272821	+	NA	NA	NA	NA	NA	NA	Y	Y	T	C	N	C	T	C	C	C	N	C	C	C	Y	N	T	T	T	T	C	T	C	T	T	C	T	T	C	T	T	T	T	T	C	C	T	C	T
AX-95014226	C/G	1A	10273589	+	NA	NA	NA	NA	NA	NA	S	S	G	G	G	G	C	G	G	C	G	G	G	S	C	S	C	C	C	C	C	C	S	C	C	G	G	C	S	C	C	C	C	C	C	C	C	C	C
AX-94532387	C/T	1A	10281897	+	NA	NA	NA	NA	NA	NA	T	T	C	C	T	T	C	T	T	C	C	C	T	Y	Y	T	Y	C	Y	Y	C	Y	Y	Y	C	C	C	Y	T	C	Y	C	C	Y	C	Y	C	C	Y
AX-94960626	A/G	1A	10334953	+	NA	NA	NA	NA	NA	NA	N	G	A	A	G	G	A	A	G	A	G	A	A	A	A	G	A	A	A	A	A	A	A	A	A	A	A	A	N	A	N	A	N	A	A	A	A	A	A
AX-108867505	G/A	1A	10638518	+	NA	NA	NA	NA	NA	NA	G	G	G	A	G	G	G	G	G	G	A	G	G	G	A	R	G	G	G	G	G	G	A	G	G	G	G	G	G	G	G	G	G	G	G	G	G	A	G
AX-108779844	G/A	1A	10668393	+	NA	NA	NA	NA	NA	NA	G	G	G	A	G	G	G	G	G	G	A	G	G	G	A	R	G	G	G	G	G	G	A	G	G	G	G	G	G	G	G	G	G	G	G	G	G	A	G
AX-95234061	A/G	1A	10668512	+	NA	NA	NA	NA	NA	NA	G	G	G	A	G	G	A	G	G	N	A	G	G	G	A	R	A	A	A	A	G	A	A	A	A	G	A	A	A	A	A	A	A	A	G	G	A	A	A
AX-112289915	A/G	1A	10735334	+	NA	NA	NA	NA	NA	NA	A	A	A	A	A	A	G	A	A	A	A	A	A	A	A	A	R	G	R	R	A	R	A	R	G	A	G	R	R	G	R	G	G	R	A	A	G	A	R
AX-95659882	G/A	1A	10735334	+	NA	NA	NA	NA	NA	NA	R	R	A	A	A	A	G	A	A	A	A	A	A	R	N	N	G	G	G	G	A	G	R	G	G	A	G	G	G	G	G	G	G	G	A	A	G	A	G
AX-94552125	A/G	1A	10735795	+	NA	NA	NA	NA	NA	NA	G	G	N	A	A	G	A	A	G	A	A	G	A	G	G	G	R	A	R	A	A	A	G	A	A	N	A	R	N	A	R	A	A	R	A	G	A	A	R
AX-94795575	A/G	1A	10742503	+	NA	NA	NA	NA	NA	NA	A	A	A	A	A	A	R	A	A	R	A	A	A	A	A	A	R	G	A	R	G	R	A	R	G	A	R	R	A	G	R	G	G	R	G	R	G	G	R
AX-94778966	C/T	1A	10754115	+	NA	NA	NA	NA	NA	NA	T	T	T	C	T	T	C	T	T	T	C	T	T	T	C	T	C	C	T	C	T	C	C	T	C	T	C	C	T	C	C	Y	C	C	T	T	C	Y	C
AX-179391616	G/A	1A	10755505	+	NA	NA	NA	NA	NA	NA	G	G	G	G	G	G	G	G	G	A	G	G	G	G	G	G	G	R	G	A	G	A	G	R	A	G	G	G	A	G	G	N	G	G	G	R	N	G	G
AX-179560926	G/A	1A	10755505	+	NA	NA	NA	NA	NA	NA	G	G	G	G	G	G	G	G	G	A	G	G	G	G	G	G	G	A	G	R	G	R	G	G	A	G	G	G	R	G	G	G	G	G	G	G	A	G	G
AX-179557970	C/A	1A	10756335	+	NA	NA	NA	NA	NA	NA	M	M	A	C	A	A	C	A	A	N	C	A	A	M	C	M	C	C	M	C	A	C	C	N	C	A	C	C	N	C	C	C	C	C	A	A	C	C	C
AX-95234918	C/A	1A	10756335	+	NA	NA	NA	NA	NA	NA	A	A	A	C	A	A	C	A	A	M	C	A	A	A	M	A	M	C	A	M	A	M	M	A	C	A	C	M	A	C	M	C	C	M	A	A	C	C	M
AX-109313937	A/G	1A	10768103	+	NA	NA	NA	NA	NA	NA	A	A	A	G	A	A	A	A	A	A	G	A	A	A	G	A	A	A	A	A	A	A	R	A	A	A	A	A	A	A	A	A	A	A	A	A	A	G	A
AX-94939233	A/G	1A	10770919	+	NA	NA	NA	NA	NA	NA	R	R	G	G	G	G	A	G	N	A	G	G	G	R	A	R	A	A	A	A	A	A	R	A	A	N	G	A	A	A	A	A	R	A	A	A	A	A	A
AX-95186303	A/C	1A	10771186	+	NA	NA	NA	NA	NA	NA	M	C	A	C	N	A	A	A	A	A	C	A	A	M	C	M	M	A	M	A	A	A	C	A	A	A	A	M	N	A	M	A	A	M	A	A	A	C	M
AX-95200832	G/T	1A	10884281	+	NA	NA	NA	NA	NA	NA	G	G	T	G	G	G	T	G	G	K	G	G	G	G	G	G	K	T	G	K	G	K	K	G	T	G	T	K	G	T	K	T	T	K	G	G	T	G	K
AX-111506120	C/T	1A	11630149	+	NA	NA	NA	NA	NA	NA	T	T	C	C	T	T	C	T	T	C	C	T	T	C	C	Y	C	C	T	C	C	C	C	T	C	C	C	C	T	C	C	C	C	C	C	C	C	C	C
AX-94401561	G/T	1A	11858886	+	NA	NA	NA	NA	NA	NA	G	G	T	T	G	G	G	G	G	G	T	G	G	G	K	G	G	G	G	G	G	G	K	G	G	G	G	G	N	G	G	G	G	G	G	G	G	T	G
AX-108916554	T/C	1A	12518017	+	NA	NA	NA	NA	NA	NA	T	T	T	C	T	T	T	T	T	T	C	T	T	T	C	T	T	T	T	T	T	T	C	T	T	T	T	T	T	T	T	T	T	T	T	T	T	C	T
AX-108980671	G/C	1A	12638873	+	NA	NA	NA	NA	NA	NA	G	G	G	C	G	G	G	G	G	G	C	G	G	G	C	G	G	G	G	G	G	G	C	G	G	G	G	G	G	G	G	G	G	G	G	G	G	C	G
AX-179557948	C/T	1A	12641701	+	NA	NA	NA	NA	NA	NA	C	C	C	C	C	C	T	T	C	C	C	C	C	C	Y	C	Y	N	Y	C	C	N	Y	C	C	C	C	Y	C	T	Y	C	T	Y	C	C	C	C	Y
AX-95660918	C/T	1A	12641701	+	NA	NA	NA	NA	NA	NA	C	N	C	C	C	C	T	C	C	C	C	C	C	C	Y	C	Y	C	Y	C	C	C	Y	C	C	C	C	Y	C	C	Y	C	C	Y	C	C	C	C	Y
AX-95175506	G/A	1A	12647734	+	NA	NA	NA	NA	NA	NA	G	G	A	A	G	G	G	G	G	G	A	G	G	G	A	G	G	G	G	G	G	G	A	G	G	G	G	G	A	G	G	G	G	G	G	G	G	A	G
AX-94943073	A/T	1A	12648319	+	NA	NA	NA	NA	NA	NA	A	A	W	T	A	A	A	A	A	A	T	A	A	A	T	A	A	A	A	A	A	A	T	A	A	A	A	A	N	A	A	A	A	A	A	A	A	N	A
AX-94894061	A/T	1A	12655691	+	NA	NA	NA	NA	NA	NA	A	A	T	T	A	A	A	A	A	A	T	A	A	A	W	A	A	A	A	A	A	A	W	A	A	A	A	A	W	A	A	A	A	A	A	A	T	T	A
AX-95231896	G/C	1A	12750831	+	NA	NA	NA	NA	NA	NA	G	G	G	C	G	G	G	G	G	G	C	G	G	G	S	G	G	G	G	G	G	G	S	G	G	G	G	G	N	G	G	G	G	G	G	G	G	C	G
AX-111450227	G/T	1A	12811108	+	NA	NA	NA	NA	NA	NA	G	G	G	T	G	G	G	G	G	G	T	G	G	G	T	G	G	G	G	G	G	G	T	G	G	G	G	G	G	G	G	G	G	G	G	G	G	T	G
AX-94484680	G/C	1A	12812195	+	NA	NA	NA	NA	NA	NA	G	G	G	C	G	G	G	G	G	G	C	G	G	G	S	G	G	G	G	G	G	G	G	G	G	G	G	G	G	G	G	G	G	G	G	G	G	C	G
AX-109057262	G/C	1A	12827807	+	NA	NA	NA	NA	NA	NA	G	G	G	C	G	G	G	G	G	G	C	G	G	G	C	G	G	G	G	G	G	G	C	G	G	G	G	G	G	G	G	G	G	G	G	G	G	C	G
AX-94982852	G/A	1A	12874390	+	NA	NA	NA	NA	NA	NA	R	R	G	A	G	A	G	G	G	G	A	G	G	R	A	R	R	G	R	G	G	G	A	G	G	G	G	R	R	G	R	G	G	R	G	G	G	A	R
AX-109984454	T/C	1A	12875828	+	NA	NA	NA	NA	NA	NA	T	T	C	C	T	T	T	T	C	T	C	T	T	T	C	T	T	T	T	T	T	T	C	T	T	T	T	T	C	T	T	T	T	T	T	T	T	C	T
AX-94791155	C/T	1A	12915592	+	NA	NA	NA	NA	NA	NA	C	C	C	T	C	C	C	C	C	C	T	C	C	C	T	C	C	C	C	C	C	C	T	C	C	C	C	C	C	C	C	C	C	C	C	C	C	T	C
AX-86172992	T/C	1A	12916423	+	NA	NA	NA	NA	NA	NA	T	T	T	C	T	T	T	T	T	T	C	T	T	T	Y	T	T	T	T	T	T	T	Y	T	T	T	T	T	T	T	T	T	T	T	T	T	T	C	T
AX-112290021	C/T	1A	12923175	+	NA	NA	NA	NA	NA	NA	C	C	C	T	C	C	C	C	C	C	T	C	C	C	T	C	C	C	C	C	C	C	Y	C	C	C	C	C	C	C	C	C	C	C	C	C	C	Y	C
AX-86178519	G/A	1A	12945712	+	NA	NA	NA	NA	NA	NA	G	R	A	R	G	G	G	G	A	G	R	G	G	N	N	G	G	G	G	G	G	G	R	G	G	G	G	N	G	G	G	N	G	G	G	G	G	R	G
AX-95107625	A/G	1A	12947038	+	NA	NA	NA	NA	NA	NA	A	A	G	G	A	A	A	A	G	A	G	A	A	A	G	A	A	A	A	A	A	A	R	A	A	A	A	A	A	A	A	A	A	A	A	A	A	G	A
AX-95105886	C/T	1A	12999941	+	NA	NA	NA	NA	NA	NA	C	C	C	T	C	C	C	C	C	C	T	C	C	C	Y	C	C	C	C	C	C	C	Y	C	C	C	C	C	C	C	C	C	C	C	C	C	C	C	C
AX-94922039	C/G	1A	13107969	+	NA	NA	NA	NA	NA	NA	C	C	C	G	C	C	C	C	C	C	G	C	C	C	G	C	C	C	C	C	C	C	G	C	C	C	C	C	C	C	C	C	C	C	C	C	C	C	C
AX-94457852	T/C	1A	13163048	+	NA	NA	NA	NA	NA	NA	T	T	T	C	C	C	T	C	T	T	C	T	N	T	T	N	T	T	T	Y	C	Y	T	Y	C	T	T	T	T	N	N	T	C	T	C	T	C	C	T
AX-94402122	G/C	1A	13163153	+	NA	NA	NA	NA	NA	NA	G	G	G	C	G	G	G	G	G	G	C	G	G	G	C	G	G	G	G	G	G	G	C	G	G	G	G	G	G	G	G	G	G	G	G	G	G	C	G
AX-95182057	A/G	1A	13173144	+	NA	NA	NA	NA	NA	NA	A	A	A	G	A	A	A	A	A	A	G	G	A	A	R	A	A	A	R	A	A	A	R	R	A	A	A	A	A	A	A	A	A	A	A	A	A	G	A
AX-178078198	A/G	1A	13341779	+	NA	NA	NA	NA	NA	NA	R	A	G	A	A	G	A	A	G	A	A	A	G	R	A	R	A	A	A	R	A	A	A	A	A	A	A	A	N	A	A	A	A	A	A	A	A	A	A
AX-94901922	A/G	1A	13341779	+	NA	NA	NA	NA	NA	NA	R	A	R	A	A	G	A	A	G	A	A	A	R	R	A	R	A	A	A	R	A	A	A	A	A	A	A	A	R	A	A	A	A	A	A	A	A	A	A
AX-179559197	G/A	1A	13342477	+	NA	NA	NA	NA	NA	NA	G	G	G	N	G	G	G	G	G	G	N	G	G	G	R	G	G	G	G	G	G	G	A	G	G	G	A	G	G	G	G	G	G	G	G	G	G	N	G
AX-95653796	G/A	1A	13342477	+	NA	NA	NA	NA	NA	NA	G	G	G	R	G	G	G	G	G	G	N	G	G	G	R	G	G	G	G	G	G	G	A	G	G	G	A	G	G	G	G	G	G	G	G	G	G	A	G
AX-181481140	A/G	1A	13343069	+	NA	NA	NA	NA	NA	NA	R	A	A	A	A	N	A	A	G	A	A	G	G	R	A	R	A	A	R	R	A	A	A	R	N	A	A	A	R	A	A	A	A	A	A	A	A	A	A
AX-94577477	G/T	1A	13343295	+	NA	NA	NA	NA	NA	NA	G	K	G	T	G	G	K	G	G	K	T	T	G	G	T	N	K	K	T	G	G	K	T	T	G	K	T	K	G	G	K	K	G	K	G	K	G	T	K
AX-111198581	A/G	1A	13351197	+	NA	NA	NA	NA	NA	NA	A	A	A	A	A	A	A	A	A	A	A	R	A	R	A	N	A	N	N	R	A	A	A	R	A	A	A	A	A	A	A	A	A	A	A	A	A	A	A
AX-94941533	A/G	1A	13351398	+	NA	NA	NA	NA	NA	NA	N	N	G	G	A	G	A	A	A	A	G	G	G	G	N	N	N	A	N	N	A	R	G	N	A	A	G	N	G	A	N	A	A	N	A	N	A	G	N
AX-94652195	G/T	1A	13351628	+	NA	NA	NA	NA	NA	NA	K	G	T	T	G	N	G	G	G	G	T	T	N	T	K	K	G	G	K	T	G	G	N	T	G	G	T	G	T	G	G	G	G	G	G	G	G	T	G
AX-179557791	A/G	1A	13402617	+	NA	NA	NA	NA	NA	NA	A	A	A	G	A	A	A	A	A	A	G	A	A	A	R	A	A	A	A	A	A	A	R	A	A	A	G	A	A	A	A	A	A	A	A	A	A	G	A
AX-89760147	A/G	1A	13402617	+	NA	NA	NA	NA	NA	NA	A	A	A	G	A	A	A	A	A	A	G	A	A	A	G	A	A	A	A	A	A	A	G	A	A	A	G	A	A	A	A	A	A	A	A	A	A	G	A
AX-95109260	C/T	1A	13554041	+	NA	NA	NA	NA	NA	NA	Y	C	N	T	C	C	C	C	C	C	T	T	Y	Y	T	N	C	C	N	N	C	C	T	Y	C	C	T	C	Y	C	C	C	C	C	C	C	C	T	C
AX-95094547	C/T	1A	13637449	+	NA	NA	NA	NA	NA	NA	C	C	T	C	C	C	C	Y	C	C	C	C	C	C	Y	C	Y	C	Y	C	C	C	C	C	C	C	C	Y	N	N	Y	C	T	C	C	C	C	C	Y
AX-94769850	T/C	1A	14215199	+	NA	NA	NA	NA	NA	NA	T	T	T	T	T	T	C	T	T	T	T	T	T	T	Y	T	Y	T	Y	T	T	T	T	T	T	N	T	Y	T	C	Y	T	C	Y	T	T	T	T	Y
AX-94926479	T/C	1A	14219248	+	NA	NA	NA	NA	NA	NA	Y	Y	T	T	T	C	C	T	C	C	T	C	T	Y	T	Y	N	C	Y	N	T	Y	T	C	C	C	T	Y	Y	T	Y	C	T	N	T	C	T	T	Y
AX-109983497	T/C	1A	14257549	+	NA	NA	NA	NA	NA	NA	T	T	T	C	T	T	T	T	T	T	C	T	C	T	C	T	T	T	T	T	T	T	C	T	T	T	C	T	T	T	T	T	T	T	T	T	T	C	T
AX-94576586	C/T	1A	14317183	+	NA	NA	NA	NA	NA	NA	C	C	C	T	C	C	C	C	C	C	T	C	T	C	Y	C	C	C	C	C	C	C	Y	C	C	C	T	C	C	C	C	C	C	C	C	C	C	T	C
AX-94404380	A/G	1A	14472200	+	NA	NA	NA	NA	NA	NA	A	A	A	G	A	A	A	A	A	A	G	A	N	A	R	A	A	A	A	A	A	A	N	A	A	A	G	A	A	A	A	N	A	A	A	A	A	G	A
AX-110094899	T/C	1A	14744274	+	NA	NA	NA	NA	NA	NA	T	T	T	C	T	T	T	T	T	T	C	T	C	T	C	T	T	T	T	T	T	T	N	T	T	T	C	T	T	T	T	T	T	T	T	T	T	C	T
AX-95659816	T/C	1A	14849720	+	NA	NA	NA	NA	NA	NA	T	T	T	C	T	T	T	T	T	T	C	T	C	T	C	T	T	T	T	T	T	T	C	C	T	T	C	T	T	T	T	T	T	T	T	T	T	C	T
AX-94910059	C/A	1A	14942312	+	NA	NA	NA	NA	NA	NA	C	C	C	A	C	C	C	C	C	C	A	C	A	C	A	C	C	C	C	C	C	C	A	C	C	C	A	C	C	C	C	C	C	C	C	C	C	A	C
AX-94773234	G/A	1A	14943287	+	NA	NA	NA	NA	NA	NA	G	G	G	A	G	G	G	G	G	G	A	G	A	G	R	G	G	G	G	G	G	G	R	G	G	G	A	G	G	G	G	G	G	G	G	G	G	A	G
AX-94787647	C/A	1A	14966214	+	NA	NA	NA	NA	NA	NA	M	M	N	N	C	C	M	C	M	C	N	M	N	M	A	M	M	C	M	C	C	C	A	C	C	M	A	M	M	C	M	C	C	M	C	C	C	C	M
AX-108909949	C/T	1A	14968053	+	NA	NA	NA	NA	NA	NA	C	C	C	T	C	C	C	C	C	C	T	C	T	C	T	C	C	C	C	C	C	C	Y	C	C	C	T	C	C	C	C	C	C	C	C	C	C	T	C
AX-179559622	C/T	1A	14968053	+	NA	NA	NA	NA	NA	NA	C	C	C	T	C	C	C	C	C	N	T	C	T	N	N	C	C	C	C	C	N	C	Y	C	C	C	T	C	C	C	C	N	C	C	C	C	N	T	C
AX-95654655	T/C	1A	15048128	+	NA	NA	NA	NA	NA	NA	T	T	T	C	T	T	T	T	T	T	C	T	C	T	Y	T	T	T	T	T	T	T	Y	T	T	T	C	T	T	T	T	T	T	T	T	T	T	C	T
AX-110988429	C/T	1A	15774595	+	NA	NA	NA	NA	NA	NA	T	T	C	C	T	T	C	T	T	C	Y	C	C	C	C	C	C	C	C	C	C	C	C	C	C	C	Y	C	C	C	C	C	C	C	C	C	C	C	C
AX-110928134	A/G	1A	16416507	+	NA	NA	NA	NA	NA	NA	A	A	A	G	A	A	A	A	A	A	G	A	G	R	G	A	R	A	R	R	A	N	G	A	A	A	A	A	A	A	A	A	A	A	A	A	A	G	A
AX-109275707	G/A	1A	16449657	+	NA	NA	NA	NA	NA	NA	G	G	G	A	G	G	G	G	G	G	A	G	A	G	N	G	G	G	G	G	G	G	A	G	G	G	G	G	G	G	G	G	G	G	G	G	G	A	G
AX-95632116	T/C	1A	16454537	+	NA	NA	NA	NA	NA	NA	Y	T	T	C	T	T	T	T	T	T	C	T	C	Y	C	Y	Y	T	Y	Y	T	Y	C	T	T	T	N	Y	Y	T	Y	T	T	N	T	T	T	C	Y
AX-108891784	G/C	1A	16454677	+	NA	NA	NA	NA	NA	NA	G	G	G	C	G	G	G	G	G	G	C	G	C	G	C	G	G	G	G	G	G	G	S	G	G	G	G	G	G	G	G	G	G	G	G	G	G	C	G
AX-94607056	A/G	1A	16456014	+	NA	NA	NA	NA	NA	NA	A	A	A	G	A	A	A	A	A	A	G	A	G	A	G	A	A	A	A	A	A	A	G	A	A	A	A	A	A	A	A	A	A	A	A	A	A	G	A
AX-179560900	G/A	1A	16456501	+	NA	NA	NA	NA	NA	NA	G	G	G	R	G	G	G	G	G	G	R	G	R	G	R	G	G	G	G	G	G	G	R	G	G	G	G	G	N	G	G	G	G	G	G	G	G	R	G
AX-95659772	G/A	1A	16456501	+	NA	NA	NA	NA	NA	NA	G	G	G	R	G	G	G	G	G	G	R	G	R	G	R	G	G	G	G	G	G	G	R	G	G	G	G	G	G	G	G	G	G	G	G	G	G	R	G
AX-94741322	A/G	1A	16945028	+	NA	NA	NA	NA	NA	NA	A	N	N	A	A	A	A	A	A	A	A	A	A	A	N	A	A	A	A	R	G	R	A	R	A	A	A	A	R	A	A	A	A	A	G	R	G	A	A
AX-109344363	G/A	1A	16946761	+	NA	NA	NA	NA	NA	NA	G	G	G	A	G	G	G	G	G	G	A	G	A	G	A	G	G	G	G	G	G	G	A	G	G	G	G	G	N	G	G	G	G	G	G	G	G	A	G
AX-86185114	T/C	1A	16953742	+	NA	NA	NA	NA	NA	NA	T	T	T	C	T	T	T	T	T	T	C	T	C	T	C	T	T	T	T	T	T	T	C	T	T	T	T	T	T	T	T	T	T	T	T	T	T	C	T
AX-86185115	T/C	1A	16953742	+	NA	NA	NA	NA	NA	NA	T	T	T	C	T	T	T	T	T	Y	C	T	C	T	Y	T	T	T	T	T	T	T	Y	T	T	T	T	T	T	T	T	T	T	T	T	T	T	C	T
AX-86164347	C/A	1A	17039936	+	NA	NA	NA	NA	NA	NA	C	C	C	A	C	C	C	C	C	C	A	C	A	C	A	C	C	C	C	C	C	C	A	C	C	C	C	C	A	C	C	C	C	C	C	C	C	A	C
AX-86164348	C/A	1A	17039936	+	NA	NA	NA	NA	NA	NA	C	C	C	A	C	C	C	C	C	C	A	C	A	C	A	C	C	M	C	C	M	C	A	M	C	C	C	C	A	C	C	M	C	C	M	M	C	A	C
AX-108928619	G/A	1A	17439078	+	NA	NA	NA	NA	NA	NA	A	A	G	G	A	A	G	A	A	G	G	A	G	A	G	A	A	G	A	A	G	G	R	G	G	G	A	G	G	G	G	G	G	A	G	G	G	G	A
AX-94923681	G/A	1A	17541915	+	NA	NA	NA	NA	NA	NA	G	G	G	A	A	G	G	G	G	G	A	N	G	A	A	N	A	G	A	G	G	G	G	G	G	A	A	N	N	A	N	G	A	G	G	G	G	G	G
AX-110016951	C/T	1A	17993925	+	NA	NA	NA	NA	NA	NA	C	C	C	T	C	C	C	C	C	C	T	C	T	C	T	C	C	C	C	C	C	C	T	C	C	C	C	C	C	C	C	C	C	C	C	C	C	T	C
AX-111017764	A/C	1A	18155019	+	NA	NA	NA	NA	NA	NA	A	A	C	C	A	A	A	A	A	A	C	A	C	A	C	A	A	A	A	A	A	A	C	A	A	A	A	A	A	A	A	A	A	A	A	A	A	C	A
AX-109886261	T/C	1A	18471369	+	NA	NA	NA	NA	NA	NA	T	T	T	C	T	T	T	T	T	T	C	T	C	T	Y	T	T	T	T	T	T	T	Y	T	T	T	T	T	T	T	T	T	T	T	T	T	T	C	T
AX-111050434	T/G	1A	18642187	+	NA	NA	NA	NA	NA	NA	T	T	T	G	T	T	T	T	T	T	G	T	G	T	K	T	T	T	T	T	T	T	K	T	T	T	T	T	T	T	T	T	T	T	T	T	T	G	T
AX-95631038	T/C	1A	18671773	+	NA	NA	NA	NA	NA	NA	Y	Y	T	C	T	T	T	T	T	T	C	T	C	Y	C	Y	Y	T	Y	Y	T	Y	C	T	T	T	T	Y	T	T	Y	T	T	Y	T	T	T	C	Y
AX-94472344	T/C	1A	18672038	+	NA	NA	NA	NA	NA	NA	C	N	T	T	C	C	T	C	C	T	T	T	T	T	T	T	T	T	T	T	C	T	T	T	T	T	C	T	T	T	T	T	C	T	T	T	T	T	T
AX-111125144	C/T	1A	18673005	+	NA	NA	NA	NA	NA	NA	C	C	C	T	C	C	C	C	C	C	T	C	T	C	T	C	C	C	C	C	C	C	T	C	C	C	C	C	C	C	C	C	C	C	C	C	C	T	C
AX-86179365	A/C	1A	20691501	+	NA	NA	NA	NA	NA	NA	M	M	N	C	A	A	A	A	A	A	C	A	C	M	C	M	M	A	A	M	A	M	C	M	A	A	A	M	A	A	M	A	A	M	A	M	A	C	M
AX-86179366	A/C	1A	20691501	+	NA	NA	NA	NA	NA	NA	M	M	C	C	A	A	A	A	A	A	C	A	C	M	C	A	M	A	M	M	A	M	C	A	A	A	A	M	M	A	N	A	A	M	A	A	A	C	M
AX-95186452	A/C	1A	20691720	+	NA	NA	NA	NA	NA	NA	A	A	C	C	A	A	A	A	A	A	C	A	C	A	M	A	A	A	A	A	A	A	M	A	A	A	A	A	N	A	A	A	A	A	A	A	A	C	A
AX-95659606	A/C	1A	20691720	+	NA	NA	NA	NA	NA	NA	A	A	N	C	A	A	A	A	A	A	C	A	C	A	C	A	A	A	M	A	A	A	C	A	A	A	A	A	A	A	A	A	A	A	A	A	A	C	A
AX-111157990	G/A	1A	20691914	+	NA	NA	NA	NA	NA	NA	A	A	G	G	G	G	A	G	A	A	G	A	G	A	R	A	A	A	A	A	G	A	A	A	G	N	A	A	A	G	A	A	G	A	G	A	G	G	A
AX-94606615	C/G	1A	20697459	+	NA	NA	NA	NA	NA	NA	C	N	G	C	G	C	C	C	C	C	C	C	C	C	N	C	C	C	G	C	C	C	C	C	C	C	C	C	G	C	C	C	G	C	C	C	C	C	C
AX-95124961	A/G	1A	20719315	+	NA	NA	NA	NA	NA	NA	A	A	A	R	A	A	A	A	A	A	R	A	R	A	R	A	A	A	A	A	A	A	R	A	A	A	A	A	A	A	A	A	A	A	A	A	A	N	A
AX-109348628	C/T	1A	21466952	+	NA	NA	NA	NA	NA	NA	T	Y	C	C	T	T	C	T	C	C	C	N	C	C	C	Y	C	C	C	C	C	C	C	C	C	C	C	C	C	C	C	C	C	C	C	C	C	C	C
AX-110983549	G/C	1A	21469941	+	NA	NA	NA	NA	NA	NA	C	S	G	G	C	C	G	C	G	G	G	N	G	G	G	S	G	G	G	G	G	G	G	G	G	G	G	G	G	G	G	G	G	G	G	G	G	G	G
AX-179475589	C/T	1A	21546526	+	NA	NA	NA	NA	NA	NA	C	C	T	T	T	C	C	T	C	C	T	C	T	C	C	C	C	C	C	C	T	C	C	C	C	C	C	C	C	T	C	C	T	C	T	C	T	T	C
AX-94599217	C/G	1A	22368558	+	NA	NA	NA	NA	NA	NA	G	C	G	C	C	G	C	C	C	C	C	C	C	C	C	C	C	C	C	C	C	C	C	C	C	C	C	C	G	C	C	C	C	C	C	C	C	C	C
AX-95084010	A/G	1A	22386624	+	NA	NA	NA	NA	NA	NA	A	N	G	A	A	A	A	A	A	A	A	A	A	A	A	A	N	A	A	A	G	A	N	G	A	A	A	A	G	A	A	G	A	A	G	G	A	G	A
AX-94710260	T/C	1A	22468851	+	NA	NA	NA	NA	NA	NA	C	T	T	T	T	C	T	T	T	T	T	T	T	C	T	Y	C	T	T	T	T	T	T	T	T	T	T	T	N	T	T	T	T	T	T	T	T	T	T
AX-95171223	C/T	1A	22696907	+	NA	NA	NA	NA	NA	NA	C	C	C	C	C	C	C	C	C	C	C	C	C	C	C	C	C	Y	C	C	T	C	C	T	C	C	C	C	C	C	C	T	C	C	T	T	C	T	C
AX-94513354	T/G	1A	22703611	+	NA	NA	NA	NA	NA	NA	T	T	G	T	T	T	T	T	T	T	T	T	T	K	K	T	K	N	K	K	G	K	T	G	T	T	T	K	G	T	K	G	T	K	G	G	T	G	K
AX-94759417	T/C	1A	22966602	+	NA	NA	NA	NA	NA	NA	Y	T	C	T	T	C	T	C	T	T	T	T	T	Y	T	Y	Y	T	T	T	T	T	Y	T	T	T	T	T	Y	T	T	T	T	T	T	T	T	T	T
AX-94710443	T/A	1A	23038966	+	NA	NA	NA	NA	NA	NA	W	T	A	T	T	A	T	A	T	T	T	T	T	W	T	W	W	T	T	T	T	T	T	T	T	T	T	T	W	T	T	T	T	T	T	T	T	T	T
AX-95237514	A/G	1A	23051196	+	NA	NA	NA	NA	NA	NA	R	R	A	G	N	G	G	G	G	A	G	A	A	A	N	A	G	A	N	G	A	G	R	R	G	G	A	G	N	G	G	A	A	G	A	A	G	A	G
AX-94785465	C/T	1A	23072809	+	NA	NA	NA	NA	NA	NA	C	N	C	C	C	C	C	C	C	C	C	C	C	Y	C	N	C	C	C	C	Y	C	N	Y	C	C	C	C	N	C	C	Y	C	C	C	N	C	Y	C
AX-94622117	G/A	1A	23072998	+	NA	NA	NA	NA	NA	NA	R	R	N	G	G	G	G	G	R	G	N	N	A	R	G	R	G	N	G	G	A	G	A	A	G	G	R	G	R	G	G	R	G	G	N	R	G	A	G
AX-95006323	G/T	1A	23095925	+	NA	NA	NA	NA	NA	NA	K	K	K	K	N	G	G	G	K	G	N	G	K	K	G	K	G	G	G	G	T	G	K	T	G	G	G	G	G	G	G	T	G	G	T	T	G	K	G
AX-94541657	C/T	1A	23225066	+	NA	NA	NA	NA	NA	NA	C	C	C	C	C	C	C	C	C	T	C	T	C	T	C	T	C	T	T	C	T	C	C	C	C	C	C	C	N	C	C	T	T	C	C	T	C	T	C
AX-94926933	A/G	1A	23625681	+	NA	NA	NA	NA	NA	NA	A	G	A	G	A	A	A	A	A	A	G	A	G	G	N	R	G	A	G	R	A	A	G	A	A	A	N	N	N	G	G	A	A	A	A	A	A	G	A
AX-111793605	A/G	1A	23965708	+	NA	NA	NA	NA	NA	NA	G	G	A	A	G	G	A	G	G	A	A	G	A	G	A	G	A	A	A	A	A	A	A	A	A	A	A	A	G	A	A	A	A	A	A	A	G	A	A
AX-111479633	T/G	1A	24089076	+	NA	NA	NA	NA	NA	NA	G	G	G	T	G	G	T	G	G	T	T	N	T	G	G	G	G	T	G	G	T	T	N	T	T	T	T	G	G	G	G	T	T	T	T	T	G	T	T
AX-94706391	G/A	1A	24479336	+	NA	NA	NA	NA	NA	NA	R	R	A	G	R	A	G	R	A	G	G	G	G	G	G	R	G	G	G	G	G	G	R	G	G	G	G	G	R	G	G	G	G	G	G	G	G	G	G
AX-179475562	A/C	1A	24917589	+	NA	NA	NA	NA	NA	NA	C	C	C	A	C	C	A	C	C	A	A	C	A	C	C	M	C	N	C	C	M	A	M	M	A	A	A	C	C	C	C	M	A	A	A	N	C	A	A
AX-95630408	A/C	1A	24917589	+	NA	NA	NA	NA	NA	NA	C	C	C	A	C	C	A	C	C	A	A	C	A	C	C	M	C	A	C	C	A	M	M	M	A	A	A	C	C	C	C	A	A	M	A	M	C	A	M
AX-89639046	T/C	1A	24991855	+	NA	NA	NA	NA	NA	NA	C	C	C	T	C	C	T	C	C	T	T	Y	T	C	C	Y	C	T	C	C	T	T	T	T	T	T	T	C	C	C	C	T	T	T	T	T	C	T	T
AX-94547512	T/C	1A	24991855	+	NA	NA	NA	NA	NA	NA	C	C	C	T	C	C	T	C	C	T	T	Y	T	C	C	Y	C	T	C	C	T	T	T	T	T	T	T	C	C	C	C	T	T	T	T	T	C	T	T
AX-108991623	C/T	1A	24997274	+	NA	NA	NA	NA	NA	NA	T	T	T	C	T	T	C	T	T	C	C	N	C	T	T	Y	T	C	T	T	C	C	C	C	C	C	C	T	T	T	T	C	C	C	C	C	T	C	C
AX-110181408	C/T	1A	25001866	+	NA	NA	NA	NA	NA	NA	T	T	C	C	C	T	C	T	T	C	C	T	C	T	T	Y	T	C	T	T	C	C	C	C	C	C	C	T	C	T	T	C	C	C	C	C	T	C	C
AX-95187202	C/T	1A	25633557	+	NA	NA	NA	NA	NA	NA	Y	Y	C	C	C	T	C	T	T	C	C	T	C	Y	Y	Y	Y	C	Y	Y	C	C	C	C	C	C	C	Y	C	T	Y	C	C	C	C	C	T	C	C
AX-110620762	C/A	1A	25980374	+	NA	NA	NA	NA	NA	NA	A	A	A	C	C	A	C	A	A	C	C	N	C	A	A	M	A	C	A	A	C	C	M	C	C	C	C	A	A	A	A	C	C	C	C	C	A	C	C
AX-110065507	G/A	1A	26248928	+	NA	NA	NA	NA	NA	NA	A	A	G	G	G	A	G	A	A	G	G	A	G	A	A	R	A	G	A	A	G	G	G	G	G	G	G	A	G	A	A	G	G	G	G	G	A	G	G
AX-110418056	G/A	1A	26253500	+	NA	NA	NA	NA	NA	NA	A	A	G	G	G	A	G	A	G	G	G	A	G	A	A	A	A	G	A	A	G	G	G	G	G	G	G	A	G	A	A	G	G	G	G	G	A	G	G
AX-110713106	G/A	1A	27323381	+	NA	NA	NA	NA	NA	NA	A	A	G	G	G	A	G	G	G	G	G	G	G	A	A	R	A	G	A	A	G	G	G	G	G	G	G	A	G	A	A	G	G	G	G	G	A	G	G
AX-94465615	C/T	1A	27325674	+	NA	NA	NA	NA	NA	NA	C	C	T	T	C	C	C	C	C	C	C	T	C	T	C	C	C	C	C	C	T	C	C	T	C	C	C	C	T	C	C	T	C	C	T	T	C	T	C
AX-179559496	T/G	1A	27697873	+	NA	NA	NA	NA	NA	NA	G	G	T	T	T	G	T	T	T	T	T	T	T	G	G	G	G	T	G	G	T	T	T	T	T	T	T	G	T	G	G	T	T	T	T	T	G	T	T
AX-95631538	T/G	1A	27697873	+	NA	NA	NA	NA	NA	NA	G	G	T	T	T	G	T	T	T	T	T	T	T	G	G	K	G	T	G	G	T	T	T	T	T	T	T	G	T	G	G	T	T	T	T	T	G	T	T
AX-94507094	C/T	1A	27699572	+	NA	NA	NA	NA	NA	NA	C	C	C	C	C	C	C	C	C	C	C	C	C	C	C	C	C	Y	C	C	T	C	C	T	C	C	C	C	C	C	C	T	C	C	T	T	C	T	C
AX-179561307	G/A	1A	27699749	+	NA	NA	NA	NA	NA	NA	A	A	G	G	G	A	G	G	G	G	G	G	G	A	A	A	A	G	A	A	G	G	G	G	G	G	G	A	G	A	A	G	G	G	G	G	A	G	G
AX-95629106	G/A	1A	27699749	+	NA	NA	NA	NA	NA	NA	A	A	G	G	G	A	G	G	G	G	G	G	G	A	A	R	A	G	A	A	G	G	G	G	G	G	G	A	G	A	A	G	G	G	G	G	A	G	G
AX-94446043	C/T	1A	27708272	+	NA	NA	NA	NA	NA	NA	Y	Y	C	C	C	T	C	C	T	C	C	C	C	Y	Y	Y	Y	C	Y	Y	C	C	C	C	C	C	C	Y	C	Y	Y	C	C	C	C	C	Y	C	C
AX-111476220	C/T	1A	27856525	+	NA	NA	NA	NA	NA	NA	C	C	C	C	T	C	C	T	T	C	C	T	C	C	T	N	T	C	T	T	C	C	C	C	C	T	C	Y	C	T	T	C	C	C	C	C	C	C	C
AX-110975901	A/G	1A	27974162	+	NA	NA	NA	NA	NA	NA	A	A	G	A	G	A	A	G	G	A	A	G	A	A	G	R	G	A	G	G	A	A	A	A	A	G	A	G	G	G	G	A	A	A	A	A	A	A	A
AX-109432280	A/G	1A	27974231	+	NA	NA	NA	NA	NA	NA	A	A	G	A	G	A	A	G	G	A	A	G	A	A	G	R	G	A	G	G	A	A	A	A	A	G	A	G	G	G	G	A	A	A	A	A	A	A	A
AX-179559920	A/G	1A	27983982	+	NA	NA	NA	NA	NA	NA	A	A	A	A	G	A	A	A	G	A	A	A	A	A	G	R	G	A	G	G	A	A	A	A	A	G	A	G	A	G	G	A	A	A	A	A	A	A	A
AX-95634520	A/G	1A	27983982	+	NA	NA	NA	NA	NA	NA	A	A	A	A	G	A	A	A	G	A	A	A	A	A	G	R	G	A	G	G	A	A	A	A	A	G	A	G	A	G	G	A	A	A	A	A	A	A	A
AX-111071692	T/C	1A	28159385	+	NA	NA	NA	NA	NA	NA	C	T	T	T	C	C	T	C	T	T	T	Y	T	T	C	C	C	T	C	C	T	T	T	T	T	C	T	C	T	C	C	T	T	T	T	T	T	T	T
AX-110058601	T/C	1A	28176211	+	NA	NA	NA	NA	NA	NA	T	T	T	T	T	T	T	T	T	T	T	T	T	T	C	Y	C	T	C	C	T	T	T	T	T	T	T	C	T	C	C	T	T	T	T	T	T	T	T
AX-108738658	G/A	1A	28211993	+	NA	NA	NA	NA	NA	NA	A	G	A	G	A	A	G	A	G	G	G	N	G	G	A	A	A	G	A	A	G	G	G	G	G	A	G	A	G	A	A	G	G	G	G	G	G	G	G
AX-109438319	A/G	1A	28469818	+	NA	NA	NA	NA	NA	NA	A	G	G	A	A	A	G	A	G	A	A	R	A	G	A	A	A	A	A	A	G	A	A	A	A	A	A	A	G	A	A	A	A	G	G	G	A	A	G
AX-110419378	G/A	1A	29254040	+	NA	NA	NA	NA	NA	NA	R	A	G	G	G	G	A	G	A	G	G	G	G	A	G	N	N	G	R	N	A	G	N	G	G	G	G	R	A	G	R	G	G	A	A	A	G	G	A
AX-95072103	G/T	1A	29269229	+	NA	NA	NA	NA	NA	NA	G	K	G	G	G	G	T	G	T	G	G	G	G	K	K	K	K	G	K	K	T	G	G	G	G	G	G	K	T	T	K	G	G	K	T	K	G	G	K
AX-178058293	G/A	1A	29269289	+	NA	NA	NA	NA	NA	NA	G	R	G	G	G	G	A	G	A	G	G	G	G	N	R	R	R	G	R	R	A	G	G	G	G	G	G	R	A	A	N	G	G	R	A	A	G	G	R
AX-95682347	G/A	1A	29269289	+	NA	NA	NA	NA	NA	NA	G	A	G	G	G	G	A	G	A	G	G	G	G	A	A	N	A	G	A	A	A	G	G	G	G	G	G	A	N	A	A	G	G	A	A	A	G	G	A
AX-95233488	C/T	1A	29275981	+	NA	NA	NA	NA	NA	NA	C	C	C	C	C	C	T	C	C	C	C	N	C	Y	C	C	C	C	C	C	T	C	C	C	C	C	C	C	C	C	C	C	C	Y	T	Y	C	C	Y
AX-111564841	A/G	1A	29600147	+	NA	NA	NA	NA	NA	NA	A	A	A	G	A	A	A	A	A	G	G	R	G	A	G	G	G	G	R	N	A	N	N	G	G	G	G	N	A	G	G	G	G	A	A	A	G	A	A
AX-94843910	T/C	1A	29847077	+	NA	NA	NA	NA	NA	NA	T	Y	C	T	T	T	C	T	C	T	T	T	T	Y	Y	T	Y	T	Y	T	C	T	T	T	T	T	T	Y	C	C	Y	T	T	Y	C	C	T	C	Y
AX-179477430	G/A	1A	29847412	+	NA	NA	NA	NA	NA	NA	N	R	G	G	G	G	G	G	G	A	G	A	G	R	N	R	G	A	R	A	G	N	A	R	G	A	A	N	R	G	R	G	G	R	G	G	G	G	R
AX-95005147	T/C	1A	30266831	+	NA	NA	NA	NA	NA	NA	T	C	T	C	T	C	T	C	C	C	C	C	C	C	C	C	N	T	C	C	T	C	C	T	C	C	C	N	T	T	N	T	C	N	T	T	T	T	N
AX-179560971	C/T	1A	30270299	+	NA	NA	NA	NA	NA	NA	C	Y	T	C	T	C	T	T	T	C	C	C	C	Y	Y	C	Y	C	Y	C	T	C	C	C	C	C	C	Y	N	T	Y	C	C	Y	T	Y	C	T	Y
AX-94694430	C/T	1A	30270299	+	NA	NA	NA	NA	NA	NA	C	Y	T	C	C	C	T	C	T	C	C	C	C	Y	Y	C	Y	C	Y	C	C	C	C	C	C	C	C	Y	N	C	Y	C	C	Y	C	Y	C	C	Y
AX-111015470	G/A	1A	30445663	+	NA	NA	NA	NA	NA	NA	A	N	G	A	G	A	G	G	G	A	A	N	A	G	G	A	G	A	G	A	G	A	A	A	A	A	A	G	G	G	G	A	A	G	G	G	A	G	G
AX-94564492	G/A	1A	30456259	+	NA	NA	NA	NA	NA	NA	G	R	G	G	N	G	G	R	R	G	G	G	G	G	G	G	G	N	G	G	A	G	G	A	G	G	G	N	G	G	N	A	G	G	A	A	G	A	G
AX-94804842	C/T	1A	30459755	+	NA	NA	NA	NA	NA	NA	T	C	C	T	C	C	C	C	C	N	T	T	T	Y	Y	C	C	N	T	Y	T	Y	C	Y	T	C	C	C	C	C	C	T	T	C	T	Y	C	T	C
AX-94627776	A/G	1A	30858559	+	NA	NA	NA	NA	NA	NA	A	A	A	A	A	A	A	A	A	A	A	A	A	A	N	A	N	R	R	A	R	A	A	R	A	A	A	N	G	G	N	G	A	A	R	R	A	R	A
AX-94833199	C/T	1A	30858821	+	NA	NA	NA	NA	NA	NA	T	T	C	T	T	T	C	T	T	T	T	T	T	T	T	T	C	C	T	T	C	T	T	C	T	T	T	C	C	C	C	C	T	C	C	C	C	C	C
AX-94826210	C/T	1A	30864592	+	NA	NA	NA	NA	NA	NA	C	Y	T	T	T	C	C	T	T	T	T	N	T	C	C	Y	C	T	C	Y	C	Y	N	Y	T	T	T	C	C	C	C	C	T	C	C	C	T	C	C
AX-111560896	T/C	1A	31012316	+	NA	NA	NA	NA	NA	NA	T	T	T	C	T	T	T	T	T	C	C	Y	C	T	T	Y	T	C	T	C	T	C	C	C	C	T	C	T	T	T	T	T	C	T	T	T	C	T	T
AX-108759985	G/C	1A	31018700	+	NA	NA	NA	NA	NA	NA	G	G	G	C	G	G	G	G	G	C	C	S	C	G	G	S	G	C	G	C	G	C	C	C	C	G	C	G	G	G	G	G	C	G	G	G	C	G	G
AX-109487586	T/C	1A	31018849	+	NA	NA	NA	NA	NA	NA	T	T	T	C	T	T	T	T	T	C	C	N	C	T	T	N	T	C	T	C	T	C	N	C	C	T	C	T	T	T	T	T	C	T	T	T	C	T	T
AX-108891329	C/A	1A	31180071	+	NA	NA	NA	NA	NA	NA	C	C	C	A	C	C	C	C	C	A	A	A	A	C	C	M	C	A	C	A	C	A	A	A	A	C	A	C	C	C	C	C	A	C	C	C	A	C	C
AX-110362870	G/C	1A	31370685	+	NA	NA	NA	NA	NA	NA	G	G	G	C	G	G	G	G	G	C	C	N	C	G	G	C	G	C	G	C	G	C	C	C	C	G	C	G	G	G	G	G	C	G	G	G	C	G	G
AX-110934450	C/T	1A	31378271	+	NA	NA	NA	NA	NA	NA	C	C	C	T	C	C	C	C	C	T	T	T	T	C	C	N	C	T	C	T	C	T	T	T	T	C	T	C	C	C	C	C	T	C	C	C	T	C	C
AX-179476265	G/A	1A	31623881	+	NA	NA	NA	NA	NA	NA	A	R	G	G	G	A	G	G	G	G	G	G	G	R	A	R	A	G	A	R	G	R	R	G	G	A	G	A	R	A	A	A	G	R	G	G	G	G	R
AX-94677585	G/A	1A	31623881	+	NA	NA	NA	NA	NA	NA	A	R	G	G	G	A	G	G	G	G	G	G	G	R	A	R	A	G	A	R	G	R	R	R	G	A	G	A	R	A	A	A	G	R	G	R	G	G	R
AX-111107499	C/T	1A	32255397	+	NA	NA	NA	NA	NA	NA	C	C	N	C	C	C	T	C	C	C	C	Y	C	T	C	C	C	C	C	C	T	C	C	C	C	C	C	C	T	C	C	C	C	T	T	T	C	T	T
AX-112286161	T/C	1A	32613473	+	NA	NA	NA	NA	NA	NA	C	Y	C	C	C	T	T	C	T	T	C	T	C	Y	Y	Y	Y	T	Y	Y	T	Y	Y	T	T	T	T	Y	N	C	Y	T	C	Y	T	T	C	T	Y
AX-94921536	C/T	1A	32613473	+	NA	NA	NA	NA	NA	NA	C	C	C	C	C	C	C	C	C	C	C	C	C	C	C	C	C	C	C	C	T	C	C	T	C	C	C	C	N	C	C	T	C	C	T	T	C	T	C
AX-86164313	C/T	1A	32615211	+	NA	NA	NA	NA	NA	NA	C	C	C	C	C	C	C	C	C	C	C	C	C	C	T	C	T	C	T	C	C	C	C	C	C	C	C	T	C	T	T	T	C	C	C	C	C	C	C
AX-86164314	C/T	1A	32615211	+	NA	NA	NA	NA	NA	NA	C	C	C	C	C	C	C	C	C	C	C	C	C	C	T	C	T	C	T	C	C	C	C	C	C	C	C	T	C	T	T	T	C	C	C	C	C	C	C
AX-95141217	C/T	1A	32615551	+	NA	NA	NA	NA	NA	NA	Y	Y	C	C	C	C	C	C	C	C	C	C	C	Y	Y	Y	Y	N	Y	Y	T	Y	Y	T	C	C	C	Y	Y	C	Y	T	C	Y	T	T	C	T	Y
AX-95685336	C/T	1A	32615551	+	NA	NA	NA	NA	NA	NA	C	C	C	C	C	C	C	C	C	C	C	C	C	C	C	C	C	N	C	C	T	C	C	T	C	C	C	C	C	C	C	T	C	C	T	T	C	T	C
AX-111613879	C/A	1A	32649495	+	NA	NA	NA	NA	NA	NA	C	C	C	C	C	C	A	C	C	C	C	M	C	A	C	C	C	C	C	C	A	C	C	C	C	C	C	C	A	C	C	C	C	A	A	A	C	A	A
AX-109492724	G/A	1A	32676084	+	NA	NA	NA	NA	NA	NA	R	R	G	G	G	G	A	G	G	G	G	G	G	A	N	G	G	G	R	G	A	R	R	G	G	G	G	G	A	G	G	G	G	A	A	A	G	A	A
AX-110494926	C/T	1A	32897000	+	NA	NA	NA	NA	NA	NA	C	C	C	C	C	C	T	C	C	C	C	Y	C	T	C	C	C	C	C	C	T	C	C	C	C	C	C	C	T	C	C	C	C	T	T	T	C	T	T
AX-111690299	C/T	1A	33003282	+	NA	NA	NA	NA	NA	NA	C	C	C	C	C	C	C	C	C	C	C	C	C	C	T	C	T	C	T	C	C	C	C	C	C	C	C	T	C	T	T	T	C	C	C	C	C	C	C
AX-109473606	C/T	1A	33022374	+	NA	NA	NA	NA	NA	NA	C	C	C	C	C	C	T	C	C	C	C	C	C	Y	C	C	C	C	C	C	T	C	C	C	C	C	C	C	Y	C	C	C	C	Y	T	Y	C	T	Y
AX-110981055	G/A	1A	33058377	+	NA	NA	NA	NA	NA	NA	G	G	G	G	G	G	A	G	G	G	G	R	G	A	G	G	G	G	G	G	A	G	G	G	G	G	G	G	A	G	G	G	G	A	A	A	G	A	A
AX-95144827	C/T	1A	33060737	+	NA	NA	NA	NA	NA	NA	C	C	C	C	C	C	C	C	C	C	C	C	C	C	C	C	C	C	Y	C	T	C	C	C	C	T	C	C	C	C	C	C	C	C	T	C	C	C	C
AX-110431391	C/G	1A	33093475	+	NA	NA	NA	NA	NA	NA	C	C	C	C	C	C	G	C	C	C	C	C	C	S	C	C	C	C	C	C	G	C	C	C	C	C	C	C	G	C	C	C	C	G	G	S	C	S	G
AX-109957260	C/G	1A	33100833	+	NA	NA	NA	NA	NA	NA	C	C	C	C	C	C	G	C	C	C	C	N	C	S	C	C	C	C	C	C	G	C	C	C	C	C	C	C	N	C	C	C	C	G	G	N	C	G	S
AX-109476672	G/A	1A	33105347	+	NA	NA	NA	NA	NA	NA	G	G	G	G	G	G	A	G	G	G	G	G	G	A	G	G	G	G	G	G	A	G	G	G	G	G	G	G	R	G	G	G	G	R	A	N	G	A	A
AX-109959487	G/A	1A	33107132	+	NA	NA	NA	NA	NA	NA	A	G	G	G	G	A	A	G	G	G	G	R	G	A	G	G	G	G	G	G	A	G	G	G	G	G	G	G	A	G	G	G	G	A	A	A	G	A	A
AX-94966460	A/G	1A	33107400	+	NA	NA	NA	NA	NA	NA	G	A	R	A	R	A	A	A	A	A	A	A	A	A	A	A	A	A	A	A	A	A	A	R	A	N	A	A	N	A	A	N	A	A	A	R	A	A	A
AX-86172690	T/C	1A	33696713	+	NA	NA	NA	NA	NA	NA	C	T	T	C	C	C	T	T	T	C	C	C	C	T	T	N	T	C	T	T	T	C	C	C	C	T	C	T	C	T	T	T	C	T	T	T	C	T	T
AX-86172692	T/C	1A	33696713	+	NA	NA	NA	NA	NA	NA	C	T	T	C	C	C	T	T	T	C	C	C	C	T	T	Y	T	C	T	T	T	C	C	C	C	T	C	T	C	T	T	T	C	T	T	T	C	T	T
AX-109387028	G/A	1A	33733072	+	NA	NA	NA	NA	NA	NA	A	G	G	A	G	A	G	G	G	A	A	A	A	G	G	R	G	A	G	G	G	A	A	A	A	G	A	G	G	G	G	G	A	G	G	G	R	G	G
AX-109912673	C/T	1A	33790749	+	NA	NA	NA	NA	NA	NA	T	C	C	T	C	T	C	C	C	T	T	T	T	C	C	Y	C	T	C	C	C	T	T	T	T	C	T	C	C	C	C	C	T	C	C	C	T	C	C
AX-111252152	T/G	1A	33811985	+	NA	NA	NA	NA	NA	NA	G	T	T	G	T	G	T	T	T	G	G	N	G	T	T	K	T	G	T	T	T	G	G	G	G	T	G	T	T	T	T	T	G	T	T	T	G	T	T
AX-89414133	C/T	1A	34019855	+	NA	NA	NA	NA	NA	NA	T	T	T	T	T	T	C	T	T	T	T	T	T	C	C	Y	C	T	C	C	C	T	T	T	T	C	T	C	T	C	C	C	T	C	C	C	T	C	C
AX-110955956	T/C	1A	34121758	+	NA	NA	NA	NA	NA	NA	T	Y	T	C	T	T	T	T	T	N	C	C	C	T	T	Y	N	C	T	T	T	C	C	C	C	T	N	T	T	T	T	T	C	N	T	T	C	T	T
AX-109398656	C/T	1A	34139896	+	NA	NA	NA	NA	NA	NA	C	C	C	T	C	C	C	C	C	T	T	Y	T	C	C	Y	C	T	C	C	C	T	T	T	T	C	T	C	C	C	C	C	T	C	C	C	T	C	C
AX-179560625	C/T	1A	34161775	+	NA	NA	NA	NA	NA	NA	C	C	C	T	C	C	C	C	C	T	T	T	T	C	C	Y	C	T	C	T	C	T	T	T	T	T	T	C	C	C	C	C	T	C	C	C	T	C	C
AX-95632080	C/T	1A	34161775	+	NA	NA	NA	NA	NA	NA	C	C	C	T	C	C	C	C	C	T	T	T	T	C	C	Y	C	T	C	T	C	T	T	T	T	T	T	C	C	C	C	C	T	C	C	C	T	C	C
AX-176653194	A/G	1A	34162590	+	NA	NA	NA	NA	NA	NA	A	N	A	R	A	A	A	A	A	G	R	R	R	A	A	R	A	A	A	A	A	G	G	A	G	A	G	A	A	A	A	A	R	A	A	A	R	A	A
AX-95679112	A/G	1A	34162590	+	NA	NA	NA	NA	NA	NA	A	A	A	G	A	N	A	A	A	G	G	G	G	A	A	R	A	G	A	A	A	G	G	G	G	A	G	A	A	A	A	A	G	A	A	A	G	A	A
AX-95662212	A/G	1A	34165029	+	NA	NA	NA	NA	NA	NA	A	A	A	A	A	A	A	A	A	A	A	A	A	A	A	A	A	A	A	A	A	A	A	R	A	A	A	A	A	A	A	G	A	A	A	R	A	A	A
AX-86165642	G/A	1A	34165159	+	NA	NA	NA	NA	NA	NA	R	R	A	G	A	N	R	A	N	G	G	G	G	R	R	G	R	G	R	G	A	G	G	G	G	G	G	R	G	A	R	A	G	R	A	R	G	A	R
AX-108809490	G/A	1A	34166837	+	NA	NA	NA	NA	NA	NA	G	G	G	A	G	G	G	G	G	A	A	R	A	G	G	R	G	A	G	G	G	A	A	A	A	G	A	G	G	G	G	G	A	G	G	G	A	G	G
AX-94406432	C/T	1A	36357131	+	NA	NA	NA	NA	NA	NA	C	C	N	C	C	C	C	C	C	C	C	C	C	C	C	C	C	C	C	C	T	C	C	T	C	C	C	C	C	C	C	T	C	C	T	T	C	T	C
AX-94619003	C/T	1A	36413085	+	NA	NA	NA	NA	NA	NA	Y	Y	C	C	C	C	C	C	C	C	C	C	C	Y	Y	Y	Y	C	Y	Y	T	Y	Y	T	C	C	C	Y	Y	C	Y	T	C	Y	T	T	C	T	Y
AX-94708814	T/C	1A	36802289	+	NA	NA	NA	NA	NA	NA	T	C	C	T	T	C	C	C	C	Y	T	T	T	T	T	C	C	Y	C	T	T	T	C	T	T	T	T	C	C	C	C	T	T	C	T	T	C	T	C
AX-95631908	T/C	1A	36802289	+	NA	NA	NA	NA	NA	NA	T	Y	C	T	T	C	C	C	C	N	T	T	T	T	T	Y	Y	N	Y	T	T	T	Y	T	T	T	T	Y	Y	C	Y	T	T	Y	T	T	C	T	Y
AX-94675197	A/G	1A	37151999	+	NA	NA	NA	NA	NA	NA	A	A	A	A	A	A	A	A	A	A	A	A	A	A	A	A	A	R	A	A	G	A	A	G	A	A	A	A	R	A	A	G	A	A	G	G	A	G	A
AX-179475774	G/A	1A	37442347	+	NA	NA	NA	NA	NA	NA	G	R	A	G	G	G	G	G	G	G	G	G	G	G	G	N	R	G	R	A	G	G	R	G	G	G	G	R	A	G	N	G	G	G	G	G	G	G	G
AX-179558500	G/A	1A	37442347	+	NA	NA	NA	NA	NA	NA	G	G	A	G	G	G	G	G	G	G	G	G	G	G	G	G	G	G	G	R	G	G	G	G	G	G	G	G	R	G	G	G	G	G	G	G	G	G	G
AX-112288902	A/G	1A	38395205	+	NA	NA	NA	NA	NA	NA	A	A	G	A	A	A	A	A	A	A	A	G	A	A	A	A	A	A	A	A	A	A	A	A	A	A	A	A	G	A	A	A	A	A	A	A	A	A	A
AX-94415898	A/G	1A	38395205	+	NA	NA	NA	NA	NA	NA	R	R	N	A	A	A	A	A	A	A	A	A	A	R	R	R	R	A	R	R	A	R	R	R	A	A	A	R	G	A	R	A	A	R	A	R	A	A	R
AX-110416310	T/A	1A	38968704	+	NA	NA	NA	NA	NA	NA	T	T	A	T	T	T	T	T	T	T	T	A	T	T	T	T	A	T	T	T	T	T	T	T	T	T	T	A	N	A	A	T	T	T	T	T	T	T	T
AX-111769036	T/A	1A	39333589	+	NA	NA	NA	NA	NA	NA	T	T	A	T	T	T	T	T	T	T	T	W	T	T	T	T	N	T	T	T	T	T	T	T	T	T	T	A	T	A	A	T	T	T	T	T	T	T	T
AX-111664626	C/T	1A	39647215	+	NA	NA	NA	NA	NA	NA	C	C	T	C	C	C	T	C	T	T	C	T	C	C	C	C	Y	T	C	C	C	C	N	C	C	T	T	Y	Y	T	Y	T	C	C	C	C	C	N	C
AX-179558922	C/T	1A	39647215	+	NA	NA	NA	NA	NA	NA	C	C	T	C	C	C	C	C	C	C	C	Y	C	C	C	C	T	C	C	C	C	C	C	C	C	C	C	T	T	T	T	C	C	C	C	C	C	C	C
AX-109338670	A/G	1A	39652212	+	NA	NA	NA	NA	NA	NA	A	A	A	A	A	A	A	A	A	A	A	R	A	A	A	A	R	A	A	A	A	A	A	A	A	A	A	R	R	G	R	A	A	A	A	A	A	A	A
AX-110961122	A/G	1A	39772155	+	NA	NA	NA	NA	NA	NA	A	N	A	A	A	A	A	A	A	A	A	N	A	R	A	A	G	A	R	A	A	N	A	A	A	A	A	G	G	G	G	A	A	R	A	R	A	A	A
AX-110442306	G/A	1A	39797893	+	NA	NA	NA	NA	NA	NA	G	G	G	G	G	G	G	G	G	G	G	R	G	G	G	G	A	G	G	G	G	G	G	G	G	G	G	A	A	A	A	G	G	G	G	G	G	G	G
AX-110426167	G/C	1A	39988480	+	NA	NA	NA	NA	NA	NA	G	G	C	G	G	G	G	G	G	G	G	C	G	G	G	G	C	G	G	G	G	G	G	G	G	G	G	C	C	C	C	G	G	G	G	G	G	G	G
AX-111513970	A/G	1A	40043103	+	NA	NA	NA	NA	NA	NA	A	A	G	A	A	A	A	A	A	A	A	R	A	A	A	A	R	A	A	A	A	A	A	A	A	A	A	R	R	G	R	A	A	A	A	A	A	A	A
AX-109830325	A/G	1A	40179587	+	NA	NA	NA	NA	NA	NA	A	A	A	A	A	A	A	A	A	A	A	R	A	A	A	A	G	A	A	A	A	A	A	A	A	A	A	G	G	G	G	A	A	A	A	A	A	A	A
AX-94645762	A/G	1A	40233603	+	NA	NA	NA	NA	NA	NA	A	A	A	A	A	A	A	A	A	A	A	G	A	A	A	A	G	A	A	A	A	A	A	A	A	A	A	G	G	G	G	A	A	A	A	A	A	A	A
AX-108731693	C/T	1A	40415527	+	NA	NA	NA	NA	NA	NA	C	C	C	C	C	C	C	C	C	C	C	T	C	C	C	C	T	C	C	C	C	C	C	C	C	C	C	T	T	T	T	C	C	C	C	C	C	C	C
AX-108869741	C/T	1A	40452557	+	NA	NA	NA	NA	NA	NA	C	C	C	C	C	C	C	C	C	C	C	N	C	C	C	C	T	C	C	C	C	C	C	C	C	C	C	T	T	T	T	C	C	C	C	C	C	C	C
AX-95095239	T/C	1A	40454950	+	NA	NA	NA	NA	NA	NA	T	T	T	T	T	T	T	T	T	T	T	T	T	T	T	T	T	T	N	T	C	T	T	C	T	T	T	T	T	T	T	C	T	T	C	C	T	C	T
AX-111190232	T/G	1A	40663987	+	NA	NA	NA	NA	NA	NA	T	T	G	T	T	T	T	T	T	T	T	K	T	T	T	K	G	T	T	T	T	T	T	T	T	T	T	G	G	G	G	T	T	T	T	T	T	T	T
AX-109852208	A/G	1A	40664765	+	NA	NA	NA	NA	NA	NA	A	A	G	A	A	A	A	A	A	A	A	G	A	A	A	R	G	A	A	A	A	A	A	A	A	A	A	G	G	G	G	A	A	A	A	A	A	A	A
AX-109889298	T/C	1A	40666162	+	NA	NA	NA	NA	NA	NA	T	T	C	T	T	T	T	T	T	T	T	N	T	T	T	T	C	T	T	T	T	T	T	T	T	T	T	C	C	C	C	T	T	T	T	T	T	T	T
AX-110998153	T/C	1A	40681795	+	NA	NA	NA	NA	NA	NA	T	T	C	T	T	T	T	T	T	T	T	C	T	T	T	Y	C	T	T	T	T	T	T	T	T	T	T	C	C	C	C	T	T	T	T	T	T	T	T
AX-108833181	T/C	1A	40688968	+	NA	NA	NA	NA	NA	NA	T	T	C	T	T	T	T	T	T	T	T	C	T	T	T	Y	C	T	T	T	T	T	T	T	T	T	T	C	C	C	C	T	T	T	T	T	T	T	T
AX-111057826	C/T	1A	40689255	+	NA	NA	NA	NA	NA	NA	C	C	T	C	C	C	C	C	C	C	C	N	C	C	C	Y	T	C	C	C	C	C	C	C	C	C	C	T	T	T	T	C	C	C	C	C	C	C	C
AX-111615602	C/T	1A	40932697	+	NA	NA	NA	NA	NA	NA	C	C	T	C	C	C	C	C	C	C	C	T	C	C	C	Y	T	C	C	C	C	C	C	C	C	C	C	T	T	T	T	C	C	C	C	C	C	C	C
AX-109819835	C/G	1A	41301560	+	NA	NA	NA	NA	NA	NA	C	C	G	C	C	C	C	C	C	C	C	G	C	C	C	S	S	C	C	C	C	C	C	C	C	C	C	S	S	G	S	C	C	C	C	C	S	C	C
AX-110016374	C/T	1A	41304083	+	NA	NA	NA	NA	NA	NA	C	C	T	C	C	C	C	C	C	C	C	T	C	C	C	Y	T	C	C	C	C	C	C	C	C	C	C	T	T	T	T	C	C	C	C	C	C	C	C
AX-110485993	T/C	1A	41390395	+	NA	NA	NA	NA	NA	NA	T	T	C	T	T	T	T	T	T	T	T	C	T	T	T	Y	C	T	T	T	T	T	T	T	T	T	T	C	C	C	C	T	T	T	T	T	T	T	T
AX-110674950	T/G	1A	41743400	+	NA	NA	NA	NA	NA	NA	T	T	G	T	T	T	T	T	T	T	T	G	T	T	T	K	G	T	G	T	T	T	T	T	T	T	T	G	G	G	G	G	T	T	T	G	T	T	T
AX-110393089	T/C	1A	41914912	+	NA	NA	NA	NA	NA	NA	T	T	N	T	T	T	T	T	T	T	T	N	T	T	T	T	Y	T	N	T	T	T	T	T	T	T	T	Y	Y	C	Y	C	T	T	T	Y	T	T	T
AX-94676481	C/T	1A	42203217	+	NA	NA	NA	NA	NA	NA	C	C	C	C	C	C	C	C	C	C	C	C	C	C	C	C	C	C	C	C	T	C	C	T	C	C	C	C	C	C	C	T	C	C	T	T	C	T	C
AX-108797649	G/A	1A	42555382	+	NA	NA	NA	NA	NA	NA	A	A	G	A	A	A	A	A	A	G	G	G	G	A	G	G	G	G	G	A	A	G	G	G	G	G	G	G	G	G	G	G	G	A	A	G	G	A	A
AX-95115596	T/C	1A	42596743	+	NA	NA	NA	NA	NA	NA	T	Y	T	T	T	T	T	T	T	T	T	T	T	T	T	T	T	T	Y	T	C	T	T	T	T	C	T	T	T	T	T	T	T	T	C	T	T	T	T
AX-111231046	T/C	1A	42601811	+	NA	NA	NA	NA	NA	NA	C	N	T	C	C	C	C	C	C	T	T	C	T	C	T	Y	T	T	T	C	C	T	T	T	T	T	T	T	C	T	T	T	T	C	C	T	T	C	C
AX-111118394	T/C	1A	42676617	+	NA	NA	NA	NA	NA	NA	C	C	T	C	C	C	C	C	C	T	T	C	T	C	T	T	T	T	T	C	C	T	T	T	T	T	T	T	T	T	T	T	T	C	C	T	T	C	C
AX-94488826	T/C	1A	42676815	+	NA	NA	NA	NA	NA	NA	C	C	T	C	T	C	C	C	C	T	T	C	T	C	T	Y	T	T	Y	C	C	N	N	T	T	T	T	N	C	T	N	T	T	C	C	T	T	C	C
AX-109823225	G/C	1A	42680165	+	NA	NA	NA	NA	NA	NA	C	C	G	C	C	C	C	C	C	G	G	C	G	C	G	G	G	G	G	C	C	G	G	G	G	G	G	G	G	G	G	G	G	C	C	G	G	C	C
AX-109491435	T/C	1A	42721162	+	NA	NA	NA	NA	NA	NA	C	C	T	C	C	C	C	C	C	T	T	C	T	C	T	Y	T	T	T	C	C	T	T	T	T	T	T	T	Y	T	T	T	T	C	C	T	T	C	C
AX-109275790	G/A	1A	42744240	+	NA	NA	NA	NA	NA	NA	N	R	G	A	A	A	A	A	A	G	G	A	G	N	G	G	G	G	G	A	A	G	G	G	G	G	G	G	N	G	G	G	G	A	A	G	G	A	A
AX-110555190	A/G	1A	42754332	+	NA	NA	NA	NA	NA	NA	G	G	A	G	G	G	G	G	G	A	A	G	A	G	A	R	G	A	A	G	G	A	A	A	A	A	A	G	G	G	G	A	A	G	G	A	A	G	G
AX-109440537	T/C	1A	42933612	+	NA	NA	NA	NA	NA	NA	C	C	T	C	C	C	C	C	C	T	N	C	T	C	T	T	T	T	T	C	C	T	N	T	T	T	T	T	T	T	T	T	N	C	C	T	N	C	C
AX-109505517	A/G	1A	42938909	+	NA	NA	NA	NA	NA	NA	G	G	A	G	G	G	G	G	G	A	A	G	A	G	A	A	G	A	A	G	G	A	A	A	A	A	A	G	G	G	G	A	A	G	G	A	A	G	G
AX-109411093	T/C	1A	42951313	+	NA	NA	NA	NA	NA	NA	C	C	T	C	C	C	C	C	C	T	T	C	T	C	T	T	T	T	T	C	C	T	N	T	T	T	T	T	T	T	T	T	T	C	C	T	T	C	C
AX-109101747	G/A	1A	43619944	+	NA	NA	NA	NA	NA	NA	A	A	G	A	A	A	A	A	A	G	G	A	G	A	G	G	G	G	G	A	A	G	G	G	G	G	G	G	G	G	G	G	G	A	A	G	G	A	A
AX-110391824	C/A	1A	43668894	+	NA	NA	NA	NA	NA	NA	C	C	A	C	C	C	C	C	C	C	C	N	C	C	C	C	M	C	C	C	C	C	C	C	C	C	C	M	M	A	M	C	C	C	C	C	C	C	C
AX-108740572	C/G	1A	43692432	+	NA	NA	NA	NA	NA	NA	C	C	G	C	C	C	C	C	C	C	C	C	C	C	C	S	G	C	C	C	C	C	C	C	C	C	C	G	G	G	G	C	C	C	C	C	C	C	C
AX-179557499	G/A	1A	43693229	+	NA	NA	NA	NA	NA	NA	R	R	G	G	A	A	G	G	A	G	G	G	G	G	G	G	G	G	R	G	A	G	G	G	G	A	G	G	G	G	G	G	G	G	A	G	G	G	G
AX-95684658	G/A	1A	43693229	+	NA	NA	NA	NA	NA	NA	R	R	G	G	A	A	G	G	A	G	G	G	G	G	G	G	G	G	R	G	A	G	G	G	G	A	G	G	G	G	G	G	G	G	A	G	G	G	G
AX-94526630	A/G	1A	43693559	+	NA	NA	NA	NA	NA	NA	A	N	G	A	A	A	A	A	A	A	A	A	A	A	A	R	G	A	A	A	A	A	A	A	A	A	A	G	G	G	G	A	A	N	A	A	A	A	A
AX-108893454	G/A	1A	43749745	+	NA	NA	NA	NA	NA	NA	G	G	G	G	G	G	G	G	G	G	G	N	G	G	G	G	G	G	A	G	G	G	G	G	G	G	G	G	G	G	G	A	G	G	G	A	G	G	G
AX-95237406	C/T	1A	43800512	+	NA	NA	NA	NA	NA	NA	C	C	T	C	C	C	C	C	C	C	C	C	C	C	C	Y	T	C	C	C	C	C	C	C	C	C	C	T	T	T	T	C	C	C	C	C	C	C	C
AX-110396408	T/C	1A	45397883	+	NA	NA	NA	NA	NA	NA	Y	Y	C	T	T	T	T	T	T	T	T	T	T	Y	Y	N	C	T	Y	Y	T	Y	Y	T	T	T	T	C	C	C	C	T	T	Y	T	T	T	T	Y
AX-94753633	A/G	1A	45399153	+	NA	NA	NA	NA	NA	NA	A	N	A	A	A	A	A	A	A	A	A	A	A	A	A	A	A	R	A	A	G	A	A	G	A	A	A	A	A	A	A	G	A	A	G	G	A	G	A
AX-110711991	T/C	1A	45912467	+	NA	NA	NA	NA	NA	NA	T	T	C	T	T	T	T	T	T	T	T	T	T	T	T	Y	C	T	T	T	T	T	T	T	T	T	T	C	T	C	C	T	T	T	T	T	T	T	T
AX-110725117	G/C	1A	46144307	+	NA	NA	NA	NA	NA	NA	G	G	C	G	G	G	G	G	G	G	G	G	G	G	G	G	S	G	G	G	G	G	G	G	G	G	G	S	G	C	S	G	G	G	G	G	G	G	G
AX-109926252	T/C	1A	46342624	+	NA	NA	NA	NA	NA	NA	T	T	C	T	T	T	T	T	T	T	T	T	T	T	T	Y	C	T	T	T	T	T	T	T	T	T	T	C	C	C	C	T	T	T	T	T	T	T	T
AX-110164971	G/A	1A	46742668	+	NA	NA	NA	NA	NA	NA	G	G	G	G	G	G	G	A	G	G	G	G	G	G	A	R	A	G	G	G	G	G	G	G	G	G	G	A	G	A	A	G	G	G	G	G	G	G	G
AX-95630284	C/T	1A	47227101	+	NA	NA	NA	NA	NA	NA	Y	C	N	T	T	N	T	C	T	C	C	C	C	Y	C	C	C	C	C	Y	T	C	C	C	C	C	C	C	Y	C	C	C	C	Y	T	C	C	T	Y
AX-112289543	G/A	1A	47230562	+	NA	NA	NA	NA	NA	NA	R	G	A	A	N	N	A	G	A	G	G	G	G	R	G	G	G	G	G	R	A	G	G	G	G	G	A	G	R	G	G	G	G	R	A	G	G	N	R
AX-95653247	G/A	1A	47230562	+	NA	NA	NA	NA	NA	NA	R	G	A	A	A	N	R	G	R	G	G	G	G	R	G	G	G	G	G	R	N	G	G	G	G	G	R	G	R	G	G	G	G	R	A	G	G	R	R
AX-108836252	C/T	1A	47232434	+	NA	NA	NA	NA	NA	NA	C	Y	C	C	C	C	C	C	C	T	T	T	T	C	C	Y	C	T	Y	C	C	Y	Y	Y	T	T	C	C	C	C	C	T	T	C	C	Y	T	C	C
AX-110508193	G/A	1A	47236395	+	NA	NA	NA	NA	NA	NA	A	G	A	A	A	A	A	A	A	G	G	G	G	A	A	R	A	G	G	A	A	G	G	G	G	G	A	A	R	A	A	G	G	A	A	G	G	A	A
AX-94416982	T/C	1A	48540157	+	NA	NA	NA	NA	NA	NA	C	T	T	C	C	C	C	T	C	T	T	T	T	C	T	T	T	T	T	C	C	T	T	T	T	T	T	T	C	T	T	T	T	C	C	T	T	C	C
AX-95632192	A/G	1A	48756593	+	NA	NA	NA	NA	NA	NA	G	A	A	G	G	G	G	A	G	A	A	N	A	G	A	A	A	A	A	G	G	A	A	A	A	A	A	A	G	A	A	A	A	G	G	A	A	G	G
AX-111672799	A/G	1A	48756602	+	NA	NA	NA	NA	NA	NA	G	A	G	G	G	G	G	A	G	A	A	N	A	G	A	A	A	A	A	G	G	A	A	A	A	A	G	A	G	A	A	A	A	G	G	A	A	G	G
AX-179561892	A/G	1A	48756602	+	NA	NA	NA	NA	NA	NA	G	A	G	G	G	G	G	A	G	A	A	R	A	G	A	A	A	A	A	G	G	A	A	A	A	A	G	A	G	A	A	A	A	G	G	A	A	G	G
AX-86179624	G/A	1A	49565550	+	NA	NA	NA	NA	NA	NA	G	R	G	G	G	G	G	A	G	A	A	A	A	G	R	R	R	A	R	G	G	R	R	R	A	A	G	R	G	A	R	A	N	G	G	R	A	G	G
AX-86179625	G/A	1A	49565550	+	NA	NA	NA	NA	NA	NA	G	R	G	G	G	G	G	A	G	A	A	N	A	G	R	R	R	A	R	G	G	R	R	R	A	A	G	R	G	A	R	A	A	G	G	R	A	G	G
AX-112287804	T/C	1A	49946632	+	NA	NA	NA	NA	NA	NA	C	T	C	C	C	C	C	T	C	T	T	Y	T	C	T	T	T	T	T	C	C	T	T	T	T	T	T	Y	T	T	T	T	T	C	C	T	T	C	C
AX-179559221	T/C	1A	49946632	+	NA	NA	NA	NA	NA	NA	C	Y	C	C	C	C	C	T	C	T	T	N	T	C	Y	Y	C	T	Y	C	C	Y	Y	T	T	T	T	C	Y	N	C	T	T	C	C	T	T	C	C
AX-95682709	G/A	1A	49946695	+	NA	NA	NA	NA	NA	NA	R	G	G	A	A	A	A	G	A	G	G	G	G	R	G	G	G	G	G	R	A	G	G	G	G	G	G	G	G	G	G	G	G	R	A	G	G	A	R
AX-179560659	A/G	1A	50063941	+	NA	NA	NA	NA	NA	NA	A	A	A	A	A	A	A	A	A	A	A	A	A	A	A	A	A	A	A	A	R	A	A	R	A	A	A	A	A	A	A	R	A	A	R	R	A	R	A
AX-95237967	G/A	1A	50063941	+	NA	NA	NA	NA	NA	NA	A	N	G	G	G	G	A	G	A	A	G	A	G	A	A	A	A	A	A	A	G	A	A	R	G	A	A	A	R	G	A	R	G	A	G	R	G	G	A
AX-94505680	C/T	1A	50263120	+	NA	NA	NA	NA	NA	NA	T	C	C	T	T	T	T	C	T	C	C	N	C	T	C	C	C	C	C	T	T	C	C	C	C	C	C	C	C	C	C	C	C	T	T	C	C	T	T
AX-108842787	T/G	1A	50500377	+	NA	NA	NA	NA	NA	NA	K	G	G	T	T	T	T	G	T	T	T	G	T	K	T	K	K	T	K	K	T	K	K	T	T	T	T	K	T	T	K	T	T	K	T	T	T	T	K
AX-110971755	C/T	1A	50531638	+	NA	NA	NA	NA	NA	NA	C	T	T	C	C	C	C	T	C	C	C	Y	C	C	C	Y	C	C	C	C	C	C	C	C	C	C	C	C	T	C	C	C	C	C	C	C	C	C	C
AX-95015265	T/C	1A	51507275	+	NA	NA	NA	NA	NA	NA	C	C	C	T	C	C	C	C	T	N	N	C	N	N	N	N	N	N	C	N	C	C	N	N	C	T	N	N	C	T	N	T	C	N	T	N	T	T	N
AX-110064204	C/T	1A	52669184	+	NA	NA	NA	NA	NA	NA	C	T	T	C	C	C	C	T	C	C	C	N	C	C	C	Y	T	C	C	C	C	C	C	C	C	C	T	T	T	T	T	C	C	C	C	C	C	C	C
AX-111024764	G/A	1A	53457620	+	NA	NA	NA	NA	NA	NA	G	G	G	G	G	G	G	A	G	G	G	G	G	G	G	G	R	G	G	G	G	G	G	G	G	G	A	R	G	A	R	G	G	G	G	G	G	G	G
AX-111532060	T/G	1A	53517126	+	NA	NA	NA	NA	NA	NA	T	G	G	T	T	T	T	G	T	T	T	T	T	T	T	K	G	T	T	T	T	T	T	T	T	T	G	G	G	G	G	T	T	T	T	T	T	T	T
AX-109032836	G/A	1A	53544032	+	NA	NA	NA	NA	NA	NA	G	G	G	G	G	G	G	A	G	G	G	G	G	G	G	R	A	G	G	G	G	G	G	G	G	G	A	A	G	A	A	G	G	G	G	G	G	G	G
AX-111458863	A/C	1A	54588705	+	NA	NA	NA	NA	NA	NA	A	C	C	A	A	A	A	A	A	A	A	A	A	A	A	A	A	A	A	A	A	A	A	A	A	A	A	A	C	A	A	A	A	A	A	A	A	A	A
AX-94860985	C/T	1A	54595902	+	NA	NA	NA	NA	NA	NA	N	N	C	C	C	C	C	C	C	C	C	C	C	N	N	N	N	C	C	N	N	N	C	N	C	C	C	N	N	C	N	T	C	C	T	N	C	T	N
AX-94902804	T/C	1A	58713853	+	NA	NA	NA	NA	NA	NA	T	T	C	T	C	T	T	T	T	T	T	T	T	T	T	T	T	T	T	T	C	T	T	C	T	C	T	T	C	T	T	C	T	T	C	C	T	C	T
AX-95211457	A/C	1A	58729325	+	NA	NA	NA	NA	NA	NA	A	A	C	A	C	A	A	A	A	A	A	A	A	A	N	A	A	M	A	A	C	A	A	C	A	C	A	A	C	A	A	C	A	A	C	C	A	C	A
AX-179561047	T/G	1A	59096988	+	NA	NA	NA	NA	NA	NA	K	K	G	K	K	G	G	K	G	G	K	G	K	K	K	K	K	G	K	K	T	K	K	T	G	G	G	K	K	K	K	T	K	K	T	T	K	T	K
AX-94743720	T/G	1A	59096988	+	NA	NA	NA	NA	NA	NA	K	K	G	K	K	G	G	N	G	G	K	G	K	K	K	K	K	G	K	K	T	K	K	T	G	G	G	K	G	K	K	T	K	K	T	T	K	T	K
AX-94570526	C/T	1A	59098163	+	NA	NA	NA	NA	NA	NA	Y	Y	C	C	C	C	C	C	C	C	C	C	C	Y	Y	Y	Y	N	Y	Y	T	Y	Y	T	C	C	C	Y	Y	C	Y	T	C	Y	T	T	C	T	Y
AX-94501329	G/T	1A	59175942	+	NA	NA	NA	NA	NA	NA	K	K	G	G	G	T	G	G	G	G	G	G	G	K	K	K	K	G	K	K	T	K	K	T	T	G	G	K	K	G	K	T	G	K	T	T	G	T	K
AX-95020117	C/T	1A	59680021	+	NA	NA	NA	NA	NA	NA	C	C	C	C	C	C	C	C	C	C	C	C	C	C	C	C	C	N	C	C	T	C	C	Y	C	C	C	C	C	C	C	T	C	C	T	Y	C	T	C
AX-112289388	A/G	1A	59681965	+	NA	NA	NA	NA	NA	NA	A	A	A	A	A	A	A	A	A	A	A	A	A	A	A	A	A	R	A	A	G	A	N	G	A	N	A	A	A	A	A	G	A	A	G	G	A	G	A
AX-95652853	A/G	1A	59681965	+	NA	NA	NA	NA	NA	NA	A	A	A	A	A	A	A	A	A	A	A	A	A	A	A	A	A	A	A	A	G	A	A	G	A	A	A	A	N	A	A	G	A	A	G	G	A	G	A
AX-94390433	G/T	1A	59729551	+	NA	NA	NA	NA	NA	NA	K	K	G	G	G	G	G	G	G	G	G	G	G	K	K	K	K	K	K	K	T	K	K	T	G	G	G	K	K	G	K	T	G	K	T	T	G	T	K
AX-94766533	C/G	1A	60593622	+	NA	NA	NA	NA	NA	NA	C	C	C	C	C	C	C	C	C	C	C	C	C	C	C	C	C	C	C	C	G	C	C	G	C	C	C	C	C	C	C	N	C	C	G	G	C	G	C
AX-111480989	G/A	1A	60956164	+	NA	NA	NA	NA	NA	NA	G	G	G	G	G	G	A	G	G	G	G	G	G	G	A	G	G	R	G	G	A	G	G	G	G	A	G	G	A	G	G	G	G	G	A	G	G	G	G
AX-110597400	T/G	1A	61113324	+	NA	NA	NA	NA	NA	NA	G	G	T	T	G	G	K	G	G	T	T	N	T	G	K	K	G	T	G	T	T	T	K	N	T	G	G	G	G	G	G	G	T	K	T	G	T	G	K
AX-94850271	C/T	1A	61995184	+	NA	NA	NA	NA	NA	NA	C	C	C	C	C	C	C	C	C	C	C	C	C	C	C	C	C	C	C	C	T	C	C	T	C	C	C	C	C	C	C	T	C	C	T	T	C	T	C
AX-94678574	C/T	1A	62427362	+	NA	NA	NA	NA	NA	NA	Y	Y	T	C	C	T	C	C	T	T	C	T	C	C	Y	Y	C	T	C	N	C	Y	C	Y	T	C	C	C	C	C	C	T	C	Y	C	Y	C	C	C
AX-110967932	C/T	1A	62767409	+	NA	NA	NA	NA	NA	NA	C	C	C	C	C	C	C	C	C	C	C	T	C	C	C	C	C	C	T	C	C	C	C	C	C	C	C	C	C	C	C	C	C	C	C	T	C	C	C
AX-95258413	C/T	1A	63066868	+	NA	NA	NA	NA	NA	NA	C	C	C	C	C	C	C	C	C	C	C	C	C	C	C	C	C	Y	C	C	T	C	C	Y	C	C	C	C	C	C	C	T	C	C	T	Y	C	T	C
AX-112290510	C/T	1A	63655821	+	NA	NA	NA	NA	NA	NA	C	C	C	C	C	C	C	C	C	C	C	C	C	C	C	C	C	N	C	C	T	C	C	T	C	C	C	C	C	C	C	T	C	C	T	T	C	T	C
AX-95662525	C/T	1A	63655821	+	NA	NA	NA	NA	NA	NA	Y	Y	C	C	C	C	C	C	C	C	C	C	C	Y	Y	Y	Y	C	Y	Y	T	Y	Y	T	C	C	C	Y	Y	C	Y	T	C	Y	T	T	C	T	Y
AX-179560629	C/T	1A	63656821	+	NA	NA	NA	NA	NA	NA	Y	Y	T	T	T	T	C	T	C	C	T	C	T	T	Y	Y	Y	C	Y	Y	C	Y	Y	C	T	C	C	Y	Y	T	Y	C	T	Y	C	C	T	C	Y
AX-95635065	T/C	1A	63656821	+	NA	NA	NA	NA	NA	NA	T	T	T	T	T	T	T	T	T	T	T	T	T	T	T	T	T	T	T	T	C	T	T	C	T	T	T	T	T	T	T	C	T	T	C	C	T	C	T
AX-94464778	A/C	1A	64359559	+	NA	NA	NA	NA	NA	NA	A	A	C	A	A	A	C	C	A	C	C	C	A	A	A	A	C	C	C	C	A	C	A	A	C	A	C	C	C	C	C	C	C	A	A	A	A	A	A
AX-94757616	C/T	1A	65661555	+	NA	NA	NA	NA	NA	NA	C	C	C	C	C	C	C	C	C	C	C	C	C	C	C	C	C	Y	C	C	T	C	C	T	C	C	C	C	C	C	C	T	C	C	T	T	C	T	C
AX-179561193	T/C	1A	65662281	+	NA	NA	NA	NA	NA	NA	T	T	T	T	T	T	T	C	T	T	T	T	T	T	T	T	Y	T	T	T	T	T	T	T	T	T	C	Y	Y	C	Y	T	T	T	T	T	T	T	T
AX-94981277	T/C	1A	65662281	+	NA	NA	NA	NA	NA	NA	T	T	T	T	T	T	T	C	T	T	T	T	T	T	T	T	Y	T	T	T	T	T	T	T	T	T	C	Y	Y	C	Y	T	T	T	T	T	T	T	T
AX-94957649	T/C	1A	65663829	+	NA	NA	NA	NA	NA	NA	T	T	Y	T	T	T	T	T	T	T	T	T	T	T	T	T	T	T	T	T	C	T	T	C	T	T	T	T	T	T	T	C	T	T	C	C	T	C	T
AX-94409481	A/G	1A	65903579	+	NA	NA	NA	NA	NA	NA	A	R	G	A	G	A	A	A	A	A	A	A	A	A	A	A	A	R	N	N	G	A	A	G	A	G	A	A	N	A	A	G	A	A	G	G	A	G	R
AX-94538361	C/T	1A	66847216	+	NA	NA	NA	NA	NA	NA	C	C	C	C	C	C	C	C	C	C	C	C	C	C	C	C	C	T	C	C	T	C	C	T	C	C	C	C	C	C	C	T	C	C	T	T	C	T	C
AX-94626802	A/C	1A	68556363	+	NA	NA	NA	NA	NA	NA	A	A	A	A	N	A	A	A	A	A	A	A	A	A	A	A	A	M	A	A	C	A	N	C	A	M	A	A	A	A	A	C	N	A	C	C	A	C	A
AX-110906528	A/G	1A	68950590	+	NA	NA	NA	NA	NA	NA	G	G	G	A	G	G	A	G	G	A	A	G	A	A	A	R	G	A	A	A	A	A	R	A	A	A	G	G	G	G	G	A	A	A	A	A	A	A	A
AX-95127933	G/A	1A	69463395	+	NA	NA	NA	NA	NA	NA	G	G	G	G	G	G	G	G	G	G	G	G	G	G	G	G	G	R	G	G	A	G	G	R	G	G	G	G	N	G	G	A	G	G	A	R	G	A	G
AX-95257185	A/G	1A	69929144	+	NA	NA	NA	NA	NA	NA	A	A	G	A	A	A	A	A	A	A	A	A	A	A	A	A	A	A	G	A	A	A	A	A	A	A	G	A	G	A	A	A	A	A	A	A	A	A	A
AX-86185098	A/G	1A	72184179	+	NA	NA	NA	NA	NA	NA	A	A	A	A	A	A	A	G	A	A	A	R	A	A	A	A	R	A	A	A	A	A	A	A	A	A	G	R	R	G	R	A	A	A	A	A	A	A	A
AX-94579225	C/T	1A	72801049	+	NA	NA	NA	NA	NA	NA	C	C	C	C	C	C	C	C	C	C	C	C	C	C	C	C	C	N	C	C	T	C	C	T	C	C	C	C	C	C	C	T	C	C	T	T	C	T	C
AX-179560646	C/A	1A	72834835	+	NA	NA	NA	NA	NA	NA	C	C	C	C	C	C	C	C	C	C	C	C	C	C	C	C	C	C	C	C	A	C	C	M	C	N	C	C	C	C	C	N	C	C	A	M	C	A	C
AX-110954516	G/A	1A	74413944	+	NA	NA	NA	NA	NA	NA	G	G	G	G	G	G	G	A	G	G	G	R	G	G	G	G	R	G	G	G	G	G	G	G	G	G	A	R	N	A	R	G	G	G	G	G	G	G	G
AX-94702383	A/C	1A	74452363	+	NA	NA	NA	NA	NA	NA	M	M	A	A	A	A	A	A	A	A	A	A	A	M	M	M	M	A	M	M	C	M	M	C	A	A	A	M	M	A	M	C	A	M	C	C	A	C	M
AX-95651789	A/C	1A	74452363	+	NA	NA	NA	NA	NA	NA	M	N	A	A	A	A	A	A	A	A	A	A	A	N	M	M	M	N	N	M	C	N	M	C	A	A	A	M	N	A	M	M	A	M	C	N	A	C	M
AX-110652842	C/A	1A	77148249	+	NA	NA	NA	NA	NA	NA	A	A	A	C	A	A	C	A	A	C	C	A	C	C	C	M	A	C	C	C	C	C	C	C	C	C	A	A	A	A	A	C	C	C	C	C	C	C	C
AX-179476470	C/A	1A	77148249	+	NA	NA	NA	NA	NA	NA	A	A	A	C	A	A	C	A	A	C	C	M	C	C	C	M	A	C	C	C	C	C	C	C	C	C	A	A	A	A	A	C	C	C	C	C	C	C	C
AX-111070423	G/A	1A	77886865	+	NA	NA	NA	NA	NA	NA	G	G	G	G	G	G	G	G	G	G	G	G	G	G	G	G	G	G	A	G	G	G	G	G	G	G	G	G	G	G	G	G	G	G	G	A	G	G	G
AX-95184743	T/C	1A	78227028	+	NA	NA	NA	NA	NA	NA	T	T	C	T	C	T	T	T	T	T	T	T	T	T	T	T	T	T	C	T	C	T	T	N	T	C	T	T	C	T	T	C	T	T	C	C	T	C	T
AX-95177870	C/T	1A	78227907	+	NA	NA	NA	NA	NA	NA	Y	Y	T	C	T	C	C	C	C	C	C	C	C	Y	Y	Y	Y	C	T	Y	T	Y	Y	T	C	T	C	Y	T	C	Y	T	C	Y	T	T	C	T	Y
AX-95659381	C/T	1A	78227907	+	NA	NA	NA	NA	NA	NA	C	C	T	C	T	C	C	C	C	C	C	C	C	C	C	C	C	Y	T	C	T	C	C	T	C	T	C	N	T	C	C	T	C	C	T	T	C	T	C
AX-94967413	A/G	1A	78229355	+	NA	NA	NA	NA	NA	NA	R	R	A	A	A	A	A	A	A	A	A	A	A	R	R	R	R	A	R	R	G	G	R	G	A	A	A	R	R	A	R	G	A	R	G	G	A	G	R
AX-95685348	A/G	1A	78229355	+	NA	NA	NA	NA	NA	NA	A	A	A	A	A	A	A	A	A	A	A	A	A	A	A	A	A	R	A	A	G	A	A	N	A	A	A	A	A	A	A	G	A	A	G	N	A	G	A
AX-95203607	C/T	1A	78917649	+	NA	NA	NA	NA	NA	NA	Y	Y	C	C	C	T	T	C	T	T	C	T	C	C	C	C	C	N	Y	Y	C	Y	Y	C	N	C	T	C	N	C	C	C	C	Y	C	C	C	C	Y
AX-95186684	C/A	1A	78917761	+	NA	NA	NA	NA	NA	NA	C	C	A	A	C	C	C	C	C	C	C	C	A	A	A	A	A	M	C	C	C	C	C	C	C	M	C	A	A	A	A	A	A	C	C	A	C	A	C
AX-94781690	A/C	1A	79680047	+	NA	NA	NA	NA	NA	NA	A	A	A	A	A	A	A	A	A	A	A	A	A	A	A	A	A	A	C	A	C	A	A	C	A	A	A	A	A	A	A	C	A	A	C	C	A	C	A
AX-94669319	G/A	1A	80102783	+	NA	NA	NA	NA	NA	NA	G	G	G	G	G	G	G	G	G	G	G	G	G	G	G	G	G	N	G	G	N	G	G	R	G	G	G	G	G	G	G	R	G	G	A	R	G	A	G
AX-95143750	C/A	1A	80821952	+	NA	NA	NA	NA	NA	NA	C	C	C	C	C	C	C	C	C	C	C	C	C	C	C	C	C	C	C	C	A	C	C	M	C	C	C	C	C	C	C	A	C	C	A	M	C	A	C
AX-94941902	C/T	1A	80833707	+	NA	NA	NA	NA	NA	NA	Y	Y	C	C	C	C	C	C	C	C	C	C	C	Y	Y	Y	Y	C	Y	Y	T	Y	Y	T	C	C	C	Y	Y	C	Y	T	C	Y	T	T	C	T	Y
AX-111582678	T/C	1A	81077409	+	NA	NA	NA	NA	NA	NA	T	N	T	T	T	T	T	T	T	C	T	T	T	T	T	N	T	Y	T	T	T	T	T	T	T	T	T	T	T	T	T	T	T	T	T	T	C	T	N
AX-179561120	C/T	1A	83205416	+	NA	NA	NA	NA	NA	NA	N	C	C	C	C	C	C	T	C	C	C	C	C	C	N	C	C	Y	C	C	Y	C	N	Y	C	C	T	N	T	C	C	Y	C	C	Y	N	C	Y	C
AX-112288925	A/G	1A	83658522	+	NA	NA	NA	NA	NA	NA	A	A	A	A	A	A	A	A	A	A	A	A	A	A	A	A	A	R	A	A	G	A	A	G	A	A	A	A	A	A	A	G	A	A	G	G	A	G	A
AX-95630601	A/G	1A	83658522	+	NA	NA	NA	NA	NA	NA	A	A	A	A	A	A	A	A	A	A	A	A	A	A	A	A	A	A	A	A	G	A	A	G	A	A	A	A	A	A	A	G	A	A	G	G	A	G	A
AX-94571699	C/A	1A	84817407	+	NA	NA	NA	NA	NA	NA	C	C	C	C	C	C	C	C	C	C	C	C	C	C	C	C	C	N	C	C	A	C	C	M	C	C	C	C	C	C	C	A	C	C	A	M	C	A	C
AX-94805209	T/G	1A	85017415	+	NA	NA	NA	NA	NA	NA	T	T	T	T	T	T	T	T	T	T	T	T	T	T	T	T	T	N	N	N	G	T	T	G	T	T	T	T	N	T	T	G	T	T	G	G	T	G	T
AX-94699494	T/C	1A	87117617	+	NA	NA	NA	NA	NA	NA	Y	Y	Y	Y	Y	T	T	C	T	T	Y	T	Y	Y	Y	Y	Y	T	Y	Y	T	Y	Y	T	T	T	Y	Y	C	Y	Y	T	Y	Y	T	T	Y	T	N
AX-112288520	G/A	1A	87289580	+	NA	NA	NA	NA	NA	NA	G	G	A	G	G	G	A	G	A	A	G	A	G	G	G	G	G	A	G	G	A	G	G	R	G	A	A	G	R	G	G	A	G	G	A	R	G	A	G
AX-95229254	A/G	1A	87695672	+	NA	NA	NA	NA	NA	NA	R	R	A	A	A	A	A	A	A	A	A	A	A	R	R	R	R	G	R	R	G	R	R	G	A	A	A	R	R	A	R	G	A	R	G	G	A	G	R
AX-95634372	A/G	1A	87695672	+	NA	NA	NA	NA	NA	NA	A	A	A	A	A	A	A	A	A	A	A	A	A	A	A	A	A	R	A	A	G	A	A	G	A	A	A	A	A	A	A	G	A	A	G	G	A	G	A
AX-94767652	G/C	1A	87697781	+	NA	NA	NA	NA	NA	NA	G	G	G	G	G	G	G	G	G	G	G	G	G	G	G	G	G	S	G	G	C	G	G	C	G	G	G	G	G	G	G	C	G	G	C	C	G	C	G
AX-94593042	C/T	1A	87698898	+	NA	NA	NA	NA	NA	NA	C	C	C	C	C	C	C	C	C	C	C	C	C	C	C	C	C	Y	C	C	T	C	C	T	C	C	C	C	C	C	C	N	C	C	T	T	C	T	C
AX-95229220	T/C	1A	90490467	+	NA	NA	NA	NA	NA	NA	T	T	Y	T	T	T	T	T	T	T	T	N	T	T	T	T	C	T	T	T	T	T	T	T	T	T	T	C	T	C	C	T	T	T	T	T	T	T	T
AX-94970170	G/A	1A	92113136	+	NA	NA	NA	NA	NA	NA	G	G	G	R	R	G	G	R	G	G	R	G	R	G	G	G	N	R	G	G	A	G	G	A	G	G	G	G	N	R	G	A	R	G	A	A	R	A	G
AX-95164640	C/T	1A	92561427	+	NA	NA	NA	NA	NA	NA	C	C	C	C	C	C	C	C	C	C	C	C	C	C	C	C	C	T	C	C	T	C	C	Y	C	C	C	C	C	C	C	T	C	C	T	Y	C	T	C
AX-94747860	G/A	1A	93620973	+	NA	NA	NA	NA	NA	NA	G	G	G	G	G	G	G	G	G	G	G	G	G	G	G	G	G	N	G	G	A	G	G	A	G	G	G	G	G	G	G	A	G	G	A	A	G	A	G
AX-95000356	A/G	1A	95199389	+	NA	NA	NA	NA	NA	NA	A	A	A	A	A	A	A	A	A	A	A	A	A	A	A	A	A	R	A	A	G	A	A	R	A	A	A	A	A	A	A	N	A	A	G	R	A	G	A
AX-95661339	A/G	1A	95199389	+	NA	NA	NA	NA	NA	NA	A	A	A	A	A	A	A	A	A	A	A	A	A	A	A	A	A	A	A	A	A	A	N	R	A	A	A	A	A	A	A	R	A	A	A	R	A	A	A
AX-95166821	A/G	1A	95206465	+	NA	NA	NA	NA	NA	NA	R	N	A	A	R	G	A	R	R	A	G	A	R	G	A	G	G	G	A	A	A	A	G	A	A	A	A	A	A	A	A	A	A	G	G	A	A	A	G
AX-95109740	T/C	1A	95206507	+	NA	NA	NA	NA	NA	NA	C	C	C	N	C	C	T	C	C	T	Y	C	Y	C	Y	C	C	T	C	Y	T	Y	N	Y	Y	T	C	C	C	C	C	C	T	N	Y	C	T	T	Y
AX-95660765	C/T	1A	95206507	+	NA	NA	NA	NA	NA	NA	C	C	C	T	C	C	T	C	C	Y	C	N	N	C	Y	C	C	Y	C	Y	T	Y	C	Y	T	T	C	C	C	C	C	C	T	C	C	C	T	T	C
AX-179395391	T/C	1A	97644022	+	NA	NA	NA	NA	NA	NA	T	T	C	C	C	C	T	C	T	T	C	T	C	T	T	T	T	T	T	T	C	T	T	T	C	T	T	T	N	C	T	T	C	T	C	T	C	C	T
AX-179476255	C/T	1A	97644022	+	NA	NA	NA	NA	NA	NA	Y	Y	C	T	T	C	T	T	T	Y	T	T	T	Y	Y	Y	Y	N	N	C	C	Y	T	C	C	T	C	Y	C	T	Y	C	T	Y	C	C	C	C	Y
AX-179560160	A/G	1A	99139655	+	NA	NA	NA	NA	NA	NA	R	R	G	A	A	A	A	A	A	A	A	A	A	R	R	R	R	A	G	R	G	R	R	G	A	G	A	R	R	A	R	N	A	R	G	G	A	G	R
AX-89589255	A/G	1A	99139655	+	NA	NA	NA	NA	NA	NA	A	A	G	A	A	A	A	A	A	A	A	A	A	A	A	A	A	N	G	A	G	A	A	G	A	G	A	A	A	A	A	G	A	A	G	G	A	G	A
AX-95132039	T/C	1A	100221007	+	NA	NA	NA	NA	NA	NA	T	T	T	T	T	T	T	T	T	T	T	T	T	T	T	T	T	N	T	T	C	T	T	Y	T	T	T	T	T	T	T	Y	T	T	C	Y	T	C	T
AX-111646682	C/T	1A	100437078	+	NA	NA	NA	NA	NA	NA	C	Y	C	C	C	C	C	T	C	C	C	N	C	C	C	C	C	C	C	C	C	C	C	C	C	C	T	C	Y	C	C	C	C	C	C	C	C	C	C
AX-94768106	C/T	1A	101133359	+	NA	NA	NA	NA	NA	NA	C	C	C	C	C	C	C	C	C	C	C	C	C	C	C	C	C	N	C	C	T	C	C	Y	C	C	C	C	Y	C	C	T	C	C	T	Y	C	T	C
AX-94538854	C/T	1A	101151572	+	NA	NA	NA	NA	NA	NA	C	C	C	C	C	C	C	C	C	C	C	C	C	C	C	C	C	C	C	C	T	C	C	T	C	C	C	C	T	C	C	T	C	C	T	T	C	T	C
AX-94764152	G/C	1A	101157909	+	NA	NA	NA	NA	NA	NA	G	G	G	G	G	G	G	G	G	G	G	G	G	G	G	G	G	S	G	G	C	G	G	C	G	N	G	G	C	G	S	C	G	G	C	C	G	C	G
AX-109326208	G/A	1A	101975796	+	NA	NA	NA	NA	NA	NA	G	A	A	G	G	G	G	A	G	G	G	A	G	G	G	N	A	G	G	G	G	G	G	G	G	G	A	A	A	A	A	G	G	G	G	G	G	G	G
AX-110988737	T/C	1A	102187135	+	NA	NA	NA	NA	NA	NA	T	C	C	T	T	T	T	C	T	T	T	C	T	T	T	Y	C	T	T	T	T	T	T	T	T	T	C	C	C	C	C	T	T	T	T	T	T	T	T
AX-94814014	A/G	1A	102202143	+	NA	NA	NA	NA	NA	NA	A	A	R	A	A	A	A	A	A	A	A	A	A	A	A	A	A	R	A	A	G	A	A	R	A	A	A	A	A	A	A	G	A	A	G	R	A	G	A
AX-94673150	G/A	1A	102260409	+	NA	NA	NA	NA	NA	NA	A	A	A	G	A	A	G	A	A	G	G	A	G	G	G	R	A	G	G	G	R	G	G	R	G	G	A	A	A	A	A	R	G	G	R	R	G	R	G
AX-179557788	G/A	1A	102573210	+	NA	NA	NA	NA	NA	NA	G	R	G	G	G	G	G	A	G	G	G	R	G	G	G	G	A	G	G	G	G	G	G	G	G	G	A	A	A	A	A	G	G	G	G	G	G	G	G
AX-95630392	G/A	1A	102573210	+	NA	NA	NA	NA	NA	NA	G	N	G	G	G	G	G	A	G	G	G	A	G	G	G	G	A	G	G	G	G	G	G	G	G	G	A	A	A	A	A	G	G	G	G	G	G	G	G
AX-110582873	A/C	1A	102577524	+	NA	NA	NA	NA	NA	NA	A	M	C	A	A	A	A	C	A	A	A	M	A	A	A	A	M	A	A	A	A	A	A	A	A	A	C	M	M	C	M	A	A	A	A	A	A	A	A
AX-179560436	C/A	1A	102665386	+	NA	NA	NA	NA	NA	NA	C	A	C	C	C	C	C	A	C	C	C	A	C	C	C	M	A	C	C	C	C	C	C	C	C	C	A	A	A	A	A	C	C	C	C	C	C	C	C
AX-95631971	C/A	1A	102665386	+	NA	NA	NA	NA	NA	NA	C	A	C	C	C	C	C	A	C	C	C	A	C	C	C	M	A	C	C	C	C	C	C	C	C	C	A	A	A	A	A	C	C	C	C	C	C	C	C
AX-111647090	T/C	1A	102668400	+	NA	NA	NA	NA	NA	NA	T	C	C	T	T	T	T	C	T	T	T	N	T	T	T	Y	C	T	T	T	T	T	T	T	T	T	C	C	C	C	C	T	T	T	T	T	T	T	T
AX-95084600	G/T	1A	104235125	+	NA	NA	NA	NA	NA	NA	G	G	G	G	G	G	G	G	G	G	G	G	G	G	G	G	G	K	G	G	T	G	G	T	G	G	G	G	G	G	G	T	G	G	T	T	G	T	G
AX-94453187	G/A	1A	104239725	+	NA	NA	NA	NA	NA	NA	R	R	G	G	G	G	G	G	G	G	G	G	G	R	R	R	R	R	R	R	A	R	R	A	G	G	G	R	R	G	R	A	G	R	A	A	G	A	R
AX-110922075	A/G	1A	104611766	+	NA	NA	NA	NA	NA	NA	A	R	G	A	A	A	A	G	A	A	A	R	A	A	A	A	R	A	A	A	A	A	A	A	A	A	G	R	R	G	R	A	A	A	A	A	A	A	A
AX-110134323	T/C	1A	104931734	+	NA	NA	NA	NA	NA	NA	T	Y	C	T	T	T	T	C	T	T	T	C	T	T	T	T	Y	T	T	T	T	T	T	T	T	T	C	Y	Y	C	Y	T	T	T	T	T	T	T	T
AX-111065296	C/T	1A	105651669	+	NA	NA	NA	NA	NA	NA	C	C	C	C	C	C	C	T	C	C	C	T	C	C	C	C	Y	C	C	C	C	C	C	C	C	C	T	Y	Y	N	Y	C	C	C	C	C	C	C	C
AX-86184056	C/T	1A	105766226	+	NA	NA	NA	NA	NA	NA	Y	Y	T	C	C	C	C	T	C	C	C	T	C	Y	Y	Y	T	C	Y	Y	C	Y	Y	C	C	C	T	T	T	T	T	C	C	Y	C	C	C	C	N
AX-86184057	C/T	1A	105766226	+	NA	NA	NA	NA	NA	NA	C	C	T	C	C	C	C	T	C	C	C	T	C	C	C	C	Y	C	C	C	C	C	C	C	C	C	T	Y	Y	T	N	C	C	C	C	C	C	C	C
AX-109514669	G/A	1A	106143551	+	NA	NA	NA	NA	NA	NA	G	G	G	G	G	G	G	A	G	G	G	A	G	G	G	G	R	G	G	G	G	G	G	G	G	G	A	R	R	A	R	G	G	G	G	G	G	G	G
AX-109280345	G/A	1A	106754614	+	NA	NA	NA	NA	NA	NA	G	G	N	G	G	G	G	A	G	G	G	R	G	G	G	G	R	G	G	G	G	G	G	G	G	G	A	R	A	A	R	G	G	G	G	G	G	G	G
AX-95260460	G/A	1A	106757451	+	NA	NA	NA	NA	NA	NA	R	R	G	G	G	A	G	G	G	G	G	G	G	R	R	R	R	N	R	R	A	R	R	A	A	G	G	R	R	G	R	R	G	R	A	A	G	A	R
AX-95633684	G/A	1A	106757451	+	NA	NA	NA	NA	NA	NA	R	R	G	G	G	G	G	G	G	G	G	G	G	R	R	R	R	N	R	R	A	R	R	A	G	N	G	R	R	G	R	A	G	R	A	A	G	A	R
AX-111123000	T/C	1A	107696219	+	NA	NA	NA	NA	NA	NA	T	T	C	T	T	T	T	C	T	T	T	C	T	T	T	T	C	T	T	T	T	T	T	T	T	T	C	C	C	C	C	T	T	T	T	T	T	T	T
AX-108979912	T/C	1A	107969301	+	NA	NA	NA	NA	NA	NA	T	T	T	T	T	T	T	N	T	T	T	N	T	T	T	T	Y	T	T	T	T	T	T	T	T	T	C	Y	Y	Y	Y	T	T	T	T	T	T	T	T
AX-94737395	T/C	1A	107969301	+	NA	NA	NA	NA	NA	NA	T	T	T	T	T	T	T	N	T	T	T	N	T	T	T	T	Y	T	T	T	T	T	T	T	T	T	C	Y	Y	N	Y	T	T	T	T	T	T	T	T
AX-110550621	C/T	1A	108647267	+	NA	NA	NA	NA	NA	NA	C	C	C	C	C	C	C	T	C	C	C	T	C	C	C	C	Y	C	C	C	C	C	C	C	C	C	T	Y	Y	T	Y	C	C	C	C	C	C	C	C
AX-109608977	G/A	1A	108896385	+	NA	NA	NA	NA	NA	NA	G	G	A	A	G	G	A	G	G	G	G	A	A	A	G	G	G	R	G	G	G	A	R	R	R	G	G	G	G	G	G	G	A	G	G	G	G	G	G
AX-86173457	T/C	1A	109583158	+	NA	NA	NA	NA	NA	NA	Y	Y	C	Y	Y	T	T	C	T	T	Y	C	Y	Y	Y	Y	C	T	Y	Y	T	Y	Y	T	T	T	C	C	C	C	C	T	Y	Y	T	T	Y	T	Y
AX-86173458	T/C	1A	109583158	+	NA	NA	NA	NA	NA	NA	T	T	C	T	T	T	T	C	T	T	T	C	T	T	T	T	Y	T	T	T	T	T	T	T	T	T	C	Y	Y	C	Y	T	T	T	T	T	T	T	T
AX-95661532	A/G	1A	109655768	+	NA	NA	NA	NA	NA	NA	A	A	G	A	A	A	A	R	A	A	A	N	A	A	A	A	R	N	A	A	R	A	N	R	A	A	G	R	G	R	R	G	A	A	R	R	A	R	A
AX-110592518	G/A	1A	109689067	+	NA	NA	NA	NA	NA	NA	G	G	A	G	G	G	G	A	G	G	G	N	G	G	G	G	R	G	G	G	G	G	G	G	G	G	A	R	R	A	R	G	G	G	G	G	G	G	G
AX-94912092	C/T	1A	109813061	+	NA	NA	NA	NA	NA	NA	Y	C	C	C	C	C	C	N	C	C	C	T	C	Y	C	N	T	C	Y	N	C	Y	N	C	C	C	T	T	T	N	T	C	C	N	C	C	C	C	N
AX-111122596	T/C	1A	110314644	+	NA	NA	NA	NA	NA	NA	T	T	C	T	T	T	T	C	T	T	T	Y	T	T	T	T	Y	T	T	T	T	T	T	T	T	T	C	Y	Y	C	Y	T	T	T	T	T	T	T	T
AX-110483334	C/T	1A	110869141	+	NA	NA	NA	NA	NA	NA	C	C	C	C	C	C	C	T	C	C	C	Y	C	C	C	C	Y	C	C	C	C	C	C	C	C	C	T	Y	Y	T	Y	C	C	C	C	C	C	C	C
AX-110562636	C/G	1A	110965865	+	NA	NA	NA	NA	NA	NA	C	C	G	C	C	C	C	G	C	C	C	N	C	C	C	C	S	C	C	C	C	C	C	C	C	C	G	S	S	G	S	C	C	C	C	C	C	C	C
AX-95229358	G/A	1A	111057177	+	NA	NA	NA	NA	NA	NA	G	G	G	G	G	G	G	A	G	G	G	A	G	G	G	G	R	G	G	G	G	G	G	G	G	G	A	R	R	A	R	G	G	G	G	G	G	G	G
AX-179558626	G/A	1A	112036353	+	NA	NA	NA	NA	NA	NA	R	R	G	G	G	G	G	G	G	G	G	G	G	R	R	R	R	N	R	R	A	R	R	A	G	N	G	R	R	G	R	A	G	R	A	A	G	A	R
AX-179476986	T/C	1A	112036405	+	NA	NA	NA	NA	NA	NA	Y	Y	T	T	T	T	T	T	T	T	T	T	T	Y	Y	Y	Y	N	Y	Y	C	Y	Y	C	T	N	T	Y	Y	T	Y	C	T	Y	C	C	T	C	Y
AX-179476578	C/T	1A	112435517	+	NA	NA	NA	NA	NA	NA	C	C	C	C	C	C	C	T	C	C	C	Y	C	C	C	C	T	C	C	C	C	C	C	C	C	C	T	N	T	T	T	C	C	C	C	C	C	C	C
AX-179561685	C/T	1A	112435517	+	NA	NA	NA	NA	NA	NA	C	C	C	C	C	C	C	Y	C	C	C	T	C	C	C	C	Y	C	C	C	C	C	C	C	C	C	T	Y	T	Y	Y	C	C	C	C	C	C	C	C
AX-94482548	A/G	1A	112684210	+	NA	NA	NA	NA	NA	NA	A	A	A	A	A	A	A	G	A	A	A	G	A	A	A	A	R	A	A	A	A	A	A	A	A	A	G	R	N	G	R	A	A	A	A	A	A	A	A
AX-179476654	A/G	1A	112865459	+	NA	NA	NA	NA	NA	NA	A	A	G	A	A	A	A	G	A	A	A	G	A	A	A	A	R	A	A	A	A	A	A	A	A	A	G	R	R	G	R	A	A	A	A	A	A	A	A
AX-179475466	G/T	1A	112867791	+	NA	NA	NA	NA	NA	NA	G	G	T	G	G	G	G	T	G	G	G	T	G	G	G	G	K	G	G	G	G	N	G	G	G	G	T	K	K	T	K	G	G	G	G	G	G	G	G
AX-94971752	G/T	1A	112867791	+	NA	NA	NA	NA	NA	NA	G	G	T	G	G	G	G	T	G	G	G	T	G	G	G	G	K	G	G	G	G	G	G	G	G	G	T	K	K	T	K	G	G	G	G	G	G	G	G
AX-94934504	A/C	1A	113124349	+	NA	NA	NA	NA	NA	NA	A	A	A	A	A	A	A	C	A	A	A	M	A	A	A	A	M	A	A	A	A	A	A	A	A	A	C	M	M	C	M	A	A	A	A	A	A	A	A
AX-110942136	G/C	1A	113406340	+	NA	NA	NA	NA	NA	NA	G	G	G	G	G	G	G	C	G	G	G	C	G	G	G	G	C	G	G	G	G	G	G	G	G	G	C	C	C	C	C	G	G	G	G	G	G	G	G
AX-179561714	A/G	1A	113743189	+	NA	NA	NA	NA	NA	NA	A	A	A	A	A	A	A	G	A	A	A	G	A	A	A	A	G	A	A	A	A	A	A	A	A	A	G	G	G	G	G	A	A	A	A	A	A	A	A
AX-95658061	A/G	1A	113743189	+	NA	NA	NA	NA	NA	NA	A	A	A	A	A	A	A	G	A	A	A	N	A	A	A	A	G	A	A	A	A	A	A	A	A	A	G	G	G	G	G	A	A	A	A	A	A	A	A
AX-109869072	T/G	1A	114096642	+	NA	NA	NA	NA	NA	NA	T	T	T	T	T	T	T	N	T	T	T	N	T	T	T	T	K	T	T	T	T	T	T	T	T	T	G	K	K	N	K	T	T	T	T	T	T	T	T
AX-111699997	C/A	1A	114135397	+	NA	NA	NA	NA	NA	NA	C	C	C	C	C	C	C	A	C	C	C	M	C	C	C	C	A	C	C	C	C	C	C	C	C	C	A	A	A	A	A	C	C	C	C	C	C	C	C
AX-110424185	A/G	1A	114664544	+	NA	NA	NA	NA	NA	NA	A	A	A	A	A	A	A	G	A	A	A	N	A	A	A	A	R	A	A	A	A	A	A	A	A	A	G	R	R	G	R	A	A	A	A	A	A	A	A
AX-112287584	G/A	1A	114837108	+	NA	NA	NA	NA	NA	NA	G	G	G	G	G	G	G	A	G	G	G	N	G	G	G	G	R	G	G	G	G	G	G	G	G	G	A	R	R	A	R	G	G	G	G	G	G	G	G
AX-95630497	G/A	1A	114837108	+	NA	NA	NA	NA	NA	NA	G	G	G	G	G	G	G	R	G	G	G	R	G	G	G	G	R	G	G	G	G	G	G	G	G	G	A	R	N	R	R	G	G	G	G	G	G	G	G
AX-94959330	T/C	1A	114839630	+	NA	NA	NA	NA	NA	NA	Y	Y	C	T	C	C	T	C	C	T	T	C	T	T	T	T	Y	T	T	T	T	T	T	T	T	T	C	Y	Y	C	Y	C	T	T	T	T	T	T	T
AX-95630462	T/C	1A	114839630	+	NA	NA	NA	NA	NA	NA	C	C	C	T	C	C	T	C	C	T	T	C	T	T	T	T	C	T	T	T	T	T	T	T	T	T	C	C	N	C	C	C	T	T	T	T	T	T	T
AX-109985886	C/G	1A	115529776	+	NA	NA	NA	NA	NA	NA	C	C	G	C	C	C	C	G	C	C	C	G	C	C	C	C	S	C	C	C	C	C	C	C	C	C	G	S	S	G	S	C	C	C	C	C	C	C	C
AX-94556854	T/C	1A	116327206	+	NA	NA	NA	NA	NA	NA	T	T	T	T	T	T	T	T	T	T	T	T	T	T	T	T	T	N	T	T	C	T	T	C	T	T	T	T	N	T	T	C	T	T	C	C	T	C	T
AX-110546253	A/C	1A	116327238	+	NA	NA	NA	NA	NA	NA	A	A	C	A	A	A	A	C	A	A	A	M	A	A	A	A	C	A	A	A	A	A	A	A	A	A	C	M	C	C	N	A	A	A	A	A	A	A	A
AX-179558664	A/C	1A	116327238	+	NA	NA	NA	NA	NA	NA	A	A	C	A	A	A	A	M	A	A	A	M	A	A	A	A	M	A	A	A	A	A	A	A	A	A	C	M	M	M	M	A	A	A	A	A	A	A	A
AX-94716299	C/T	1A	118830221	+	NA	NA	NA	NA	NA	NA	C	C	T	C	C	C	C	T	C	C	C	T	C	C	C	C	Y	C	C	C	C	C	N	C	C	C	T	Y	Y	T	Y	C	C	C	C	C	C	C	C
AX-95629980	C/T	1A	118830221	+	NA	NA	NA	NA	NA	NA	C	C	T	C	C	C	C	T	N	C	C	T	C	C	C	C	Y	C	C	C	C	C	Y	C	C	C	T	Y	Y	T	Y	C	C	C	C	C	C	C	C
AX-111604778	C/T	1A	119244011	+	NA	NA	NA	NA	NA	NA	T	C	C	C	T	T	C	T	T	C	C	N	C	C	C	C	T	C	C	C	C	C	C	C	C	C	T	T	T	T	T	C	C	C	C	C	C	C	C
AX-94435812	T/C	1A	119308243	+	NA	NA	NA	NA	NA	NA	Y	T	T	T	C	C	T	C	C	T	T	C	T	T	T	T	Y	T	T	T	T	T	T	T	T	T	C	Y	Y	C	Y	Y	T	T	T	T	T	T	T
AX-95630123	T/C	1A	119308243	+	NA	NA	NA	NA	NA	NA	C	T	T	T	C	C	T	C	C	T	T	N	T	T	T	T	Y	T	T	T	T	T	T	T	T	T	C	N	C	C	C	T	T	T	T	T	T	T	T
AX-95652827	G/T	1A	119308466	+	NA	NA	NA	NA	NA	NA	K	G	G	G	T	T	G	N	K	G	G	G	G	G	G	G	K	G	G	G	G	G	N	G	G	G	K	N	K	T	K	G	G	G	G	G	G	G	G
AX-110574139	C/T	1A	119522354	+	NA	NA	NA	NA	NA	NA	Y	C	C	C	T	T	C	T	T	C	C	T	C	C	C	C	Y	C	C	C	C	C	C	C	C	C	T	Y	Y	T	Y	C	C	C	C	C	C	C	C
AX-94995394	G/T	1A	119834533	+	NA	NA	NA	NA	NA	NA	G	G	G	G	G	G	G	G	G	G	G	G	G	G	G	G	G	G	G	G	T	G	K	K	G	G	G	G	G	G	G	T	G	G	T	K	G	T	G
AX-95163453	A/G	1A	120172291	+	NA	NA	NA	NA	NA	NA	A	N	A	A	A	A	A	A	A	A	A	A	A	A	A	A	A	N	A	A	G	A	A	G	A	A	A	A	A	A	A	G	A	A	G	G	A	G	A
AX-95678907	T/C	1A	120173393	+	NA	NA	NA	NA	NA	NA	T	N	T	T	T	T	T	T	T	T	T	T	T	T	T	T	T	T	T	T	C	T	T	C	T	N	T	T	T	T	T	C	T	Y	C	C	T	C	T
AX-94460543	A/T	1A	120532967	+	NA	NA	NA	NA	NA	NA	W	A	A	A	T	T	A	T	T	A	A	T	A	A	A	A	W	A	A	A	A	A	A	A	A	A	T	W	W	T	W	A	A	A	A	A	A	A	A
AX-94782852	C/G	1A	120702412	+	NA	NA	NA	NA	NA	NA	C	S	C	C	S	G	C	C	G	N	C	C	C	C	N	C	C	C	C	C	C	C	C	C	C	C	G	C	C	C	C	C	C	C	C	C	C	C	C
AX-95095578	T/G	1A	121040970	+	NA	NA	NA	NA	NA	NA	K	T	T	T	G	G	T	G	G	T	T	K	T	T	T	T	K	T	T	T	T	T	T	T	T	T	G	K	G	G	K	T	T	T	T	T	T	T	T
AX-179476988	T/G	1A	121047862	+	NA	NA	NA	NA	NA	NA	T	T	T	T	T	T	T	T	T	T	T	T	T	T	T	T	T	N	T	T	G	T	N	G	T	T	T	T	T	T	T	G	T	T	G	G	T	G	N
AX-86165256	C/T	1A	121048066	+	NA	NA	NA	NA	NA	NA	Y	C	T	C	T	T	C	T	T	C	C	T	C	C	C	C	Y	C	C	C	C	C	C	C	C	C	T	Y	Y	T	Y	C	C	C	C	C	C	C	C
AX-86165257	C/T	1A	121048066	+	NA	NA	NA	NA	NA	NA	Y	C	T	C	T	T	C	T	T	C	C	Y	C	C	C	C	Y	C	C	C	C	C	C	C	C	C	T	Y	Y	T	Y	C	C	C	C	C	C	C	C
AX-179557575	T/G	1A	121048363	+	NA	NA	NA	NA	NA	NA	G	T	G	T	G	G	T	G	G	T	T	N	T	T	T	T	G	N	T	T	K	T	T	K	T	T	G	G	G	G	G	K	T	T	K	K	T	K	T
AX-94510917	T/G	1A	121048363	+	NA	NA	NA	NA	NA	NA	G	T	G	T	G	G	T	G	G	T	T	N	T	T	T	T	G	T	T	T	T	N	N	K	T	T	G	G	G	G	G	T	T	T	T	K	T	T	T
AX-109506649	G/C	1A	121063908	+	NA	NA	NA	NA	NA	NA	S	G	C	G	C	C	G	C	C	G	G	C	G	G	G	G	S	G	G	G	G	G	G	G	G	G	C	S	S	C	S	G	G	G	G	G	G	G	G
AX-179558910	A/G	1A	122097356	+	NA	NA	NA	NA	NA	NA	R	A	G	A	G	G	A	G	G	A	A	G	A	A	A	A	R	A	A	A	A	A	A	A	A	A	G	R	R	G	R	A	A	A	A	A	A	A	A
AX-95658497	A/G	1A	122097356	+	NA	NA	NA	NA	NA	NA	R	A	G	A	G	G	A	G	G	A	A	G	A	A	A	A	R	A	A	A	A	A	A	A	A	A	G	R	R	G	R	A	A	A	A	A	A	A	A
AX-110592405	A/G	1A	122619688	+	NA	NA	NA	NA	NA	NA	A	A	A	A	A	A	A	G	A	A	A	N	A	A	A	A	R	A	A	A	A	A	A	A	A	A	G	R	R	G	R	A	A	A	A	A	A	A	A
AX-109940096	C/T	1A	123395285	+	NA	NA	NA	NA	NA	NA	C	C	C	C	C	C	C	T	C	C	C	N	C	C	C	C	T	C	C	C	C	C	C	C	C	C	T	T	T	T	T	C	C	C	C	C	C	C	C
AX-111118849	C/T	1A	125607172	+	NA	NA	NA	NA	NA	NA	C	C	C	C	C	C	C	T	C	C	C	N	C	C	C	C	T	C	C	C	C	C	C	C	C	C	T	T	T	T	T	C	C	C	C	C	C	C	C
AX-95016210	T/C	1A	126002939	+	NA	NA	NA	NA	NA	NA	T	T	T	T	T	T	T	T	T	T	T	T	T	T	T	T	T	T	T	T	C	T	T	C	T	T	T	T	T	T	T	C	T	T	C	C	T	C	T
AX-111549410	C/T	1A	126213464	+	NA	NA	NA	NA	NA	NA	C	C	C	C	C	C	C	T	C	C	C	T	C	C	C	C	Y	C	C	C	C	C	C	C	C	C	T	Y	Y	T	Y	C	C	C	C	C	C	C	C
AX-95242117	C/T	1A	126214551	+	NA	NA	NA	NA	NA	NA	C	C	C	C	C	C	C	N	C	C	C	T	C	C	C	C	Y	C	C	C	C	C	C	C	C	C	T	Y	Y	T	Y	C	N	C	C	C	C	C	C
AX-111614711	G/A	1A	126722271	+	NA	NA	NA	NA	NA	NA	G	G	G	G	G	G	G	A	G	G	G	R	G	G	G	G	R	G	G	G	G	G	G	G	G	G	A	R	R	A	R	G	G	G	G	G	G	G	G
AX-111456450	A/G	1A	127617179	+	NA	NA	NA	NA	NA	NA	A	A	A	A	A	A	A	G	A	A	A	G	A	A	A	A	R	A	A	A	A	A	A	A	A	A	G	R	R	N	R	A	A	A	A	A	A	A	A
AX-111549875	T/C	1A	127658178	+	NA	NA	NA	NA	NA	NA	T	T	C	T	T	T	T	C	T	T	T	C	T	T	T	T	Y	T	T	T	T	T	T	T	T	T	C	Y	Y	C	Y	T	T	T	T	T	T	T	T
AX-94885606	T/C	1A	128174169	+	NA	NA	NA	NA	NA	NA	T	T	T	T	T	T	T	T	T	T	T	T	T	T	T	T	T	N	T	T	C	T	T	C	T	T	T	T	T	T	T	C	T	T	C	C	T	C	T
AX-110439526	A/C	1A	128174539	+	NA	NA	NA	NA	NA	NA	M	M	C	A	A	A	A	C	A	A	A	C	A	M	M	N	C	A	M	M	A	M	M	N	A	A	C	C	C	C	C	A	A	A	A	A	A	A	M
AX-95661636	A/C	1A	128174539	+	NA	NA	NA	NA	NA	NA	A	A	C	A	A	A	A	C	A	A	A	C	A	A	A	A	N	A	A	A	A	A	A	A	A	A	C	C	N	C	N	A	A	A	A	A	A	A	A
AX-179475507	G/T	1A	128175554	+	NA	NA	NA	NA	NA	NA	G	G	G	G	G	G	G	G	G	G	G	G	G	G	G	G	G	N	G	G	T	G	G	K	G	G	G	G	G	G	G	T	G	G	T	K	G	T	G
AX-110068247	T/G	1A	128389324	+	NA	NA	NA	NA	NA	NA	T	T	T	T	T	T	T	G	T	T	T	G	T	T	T	T	K	T	T	T	T	T	T	T	T	T	G	K	K	G	K	T	T	T	T	T	T	T	T
AX-179558336	T/C	1A	131158530	+	NA	NA	NA	NA	NA	NA	T	T	C	T	T	T	T	C	T	T	T	C	T	T	T	T	Y	T	T	T	T	T	T	T	T	T	C	Y	Y	C	Y	T	T	T	T	T	T	T	T
AX-94599511	C/T	1A	132066851	+	NA	NA	NA	NA	NA	NA	C	C	C	C	C	C	C	C	C	C	C	C	C	C	C	C	C	Y	C	C	T	C	C	T	C	C	C	C	N	C	C	T	C	C	T	T	C	T	C
AX-95163141	C/T	1A	132564176	+	NA	NA	NA	NA	NA	NA	Y	Y	C	C	C	C	C	C	C	C	C	C	C	Y	Y	Y	Y	T	Y	Y	T	Y	Y	T	C	C	C	Y	C	C	Y	T	N	Y	T	T	C	T	Y
AX-94580006	A/G	1A	132564246	+	NA	NA	NA	NA	NA	NA	R	R	A	A	A	A	A	A	A	A	A	A	A	R	R	R	R	R	R	R	G	R	R	G	A	G	A	R	A	A	R	G	A	R	G	G	A	G	R
AX-94916500	G/T	1A	133010899	+	NA	NA	NA	NA	NA	NA	K	K	G	G	G	G	G	G	G	G	G	G	G	K	K	K	K	N	K	K	N	K	K	T	G	G	G	K	G	G	K	T	G	K	T	T	G	T	K
AX-108987011	T/C	1A	133181954	+	NA	NA	NA	NA	NA	NA	T	T	T	T	T	T	T	C	T	T	T	N	T	T	T	T	Y	T	T	T	T	T	T	T	T	T	C	Y	N	C	Y	T	T	T	T	T	T	T	T
AX-112289512	A/C	1A	133459060	+	NA	NA	NA	NA	NA	NA	A	A	A	A	A	A	A	A	A	A	A	A	N	A	A	A	A	M	A	A	C	A	A	C	A	N	A	A	A	A	A	C	A	A	C	C	A	C	A
AX-94897502	C/G	1A	133516938	+	NA	NA	NA	NA	NA	NA	C	C	C	C	C	C	C	G	C	C	C	G	C	C	C	C	S	C	C	C	C	C	S	C	C	C	G	S	S	G	S	C	C	C	C	C	C	C	C
AX-179561535	T/C	1A	133522198	+	NA	NA	NA	NA	NA	NA	T	T	C	T	T	T	T	C	T	T	T	C	T	T	T	T	Y	T	T	T	T	T	T	T	T	T	C	Y	Y	C	Y	T	T	T	T	T	T	T	T
AX-95629442	T/C	1A	133522198	+	NA	NA	NA	NA	NA	NA	T	T	C	T	T	T	T	C	T	T	T	Y	T	T	T	T	C	T	T	T	T	T	T	T	T	T	C	C	C	C	C	T	T	T	T	T	T	T	T
AX-111064175	A/G	1A	133820152	+	NA	NA	NA	NA	NA	NA	R	R	G	R	R	A	A	G	A	A	R	G	R	R	R	R	G	A	R	R	A	R	R	A	A	A	G	G	G	G	G	A	R	R	A	A	R	A	R
AX-95654183	A/G	1A	133820152	+	NA	NA	NA	NA	NA	NA	A	A	G	A	A	A	A	G	A	A	A	N	A	A	A	A	R	A	A	A	A	A	A	A	A	A	G	R	R	G	R	A	A	A	A	A	A	A	A
AX-94660066	C/T	1A	133821030	+	NA	NA	NA	NA	NA	NA	C	C	C	C	C	C	C	C	C	C	C	C	C	C	C	C	C	Y	C	C	T	C	N	T	C	C	C	C	C	C	C	T	C	C	T	T	C	T	C
AX-179557810	G/T	1A	133845920	+	NA	NA	NA	NA	NA	NA	G	G	G	G	G	G	G	T	G	G	G	T	G	G	G	G	T	G	G	G	G	G	G	G	G	G	T	T	T	T	T	G	G	G	G	G	G	G	G
AX-94493474	G/T	1A	133845920	+	NA	NA	NA	NA	NA	NA	G	G	G	G	G	G	G	T	G	G	G	T	G	G	G	K	T	G	G	G	G	G	K	G	G	G	T	T	T	T	T	G	G	K	G	G	G	G	G
AX-111263418	G/A	1A	134120951	+	NA	NA	NA	NA	NA	NA	G	G	G	G	G	G	G	A	G	G	G	A	G	G	G	G	A	G	G	G	G	G	G	G	G	G	A	A	A	A	A	G	G	G	G	G	G	G	G
AX-110689839	A/G	1A	135089331	+	NA	NA	NA	NA	NA	NA	R	R	A	A	G	G	A	G	G	A	A	R	A	A	A	A	R	A	A	A	A	A	A	A	A	A	G	R	R	G	R	A	A	A	A	A	A	A	A
AX-95634628	G/T	1A	135979950	+	NA	NA	NA	NA	NA	NA	K	K	G	G	G	G	G	G	G	G	G	G	G	K	K	K	K	N	K	K	T	K	K	T	G	G	G	K	K	G	K	T	G	K	T	T	G	T	K
AX-95684416	A/G	1A	136553720	+	NA	NA	NA	NA	NA	NA	A	A	G	A	A	A	A	G	A	A	A	G	A	A	A	A	R	A	A	A	A	A	A	A	A	A	G	R	R	G	R	A	A	A	A	A	A	A	A
AX-86164592	C/T	1A	137017305	+	NA	NA	NA	NA	NA	NA	C	C	C	C	C	C	C	Y	C	C	C	Y	C	C	C	C	Y	C	C	C	C	C	C	C	C	C	T	Y	Y	T	Y	C	C	C	C	C	C	C	C
AX-179559897	A/G	1A	138009617	+	NA	NA	NA	NA	NA	NA	A	A	A	A	A	A	A	A	A	A	A	A	A	A	A	A	A	R	A	A	G	A	A	G	A	G	A	A	G	A	A	G	A	A	G	G	A	G	A
AX-94766574	A/G	1A	138009617	+	NA	NA	NA	NA	NA	NA	A	A	A	A	A	A	A	A	A	A	A	A	A	A	A	A	A	R	A	A	G	A	A	G	A	G	A	A	G	A	A	G	A	A	G	G	A	G	A
AX-94700372	G/A	1A	138013843	+	NA	NA	NA	NA	NA	NA	G	G	G	R	R	G	G	R	G	G	R	G	R	G	G	G	G	R	G	G	A	G	G	A	G	G	G	G	N	R	G	A	R	G	A	A	R	A	G
AX-112288961	G/A	1A	138015207	+	NA	NA	NA	NA	NA	NA	G	G	G	G	G	G	G	R	G	G	G	N	G	G	G	G	R	G	G	G	G	G	G	G	G	G	A	R	A	R	R	G	G	G	G	G	G	G	G
AX-179476509	G/A	1A	138015207	+	NA	NA	NA	NA	NA	NA	G	G	G	G	G	G	G	R	G	G	G	R	G	G	G	G	R	G	G	G	G	G	G	G	G	G	A	R	A	R	R	G	G	G	G	G	G	G	G
AX-94453050	G/A	1A	138467287	+	NA	NA	NA	NA	NA	NA	G	G	G	G	G	G	G	A	G	N	G	R	G	G	G	G	R	G	G	G	G	G	G	G	G	G	A	R	R	A	R	G	G	G	G	G	G	G	G
AX-94456108	A/G	1A	138944039	+	NA	NA	NA	NA	NA	NA	R	R	G	A	R	R	A	G	R	A	R	G	R	A	A	A	G	A	A	A	A	A	R	A	A	A	G	G	G	G	G	A	A	A	A	A	A	A	A
AX-109983715	T/C	1A	139063389	+	NA	NA	NA	NA	NA	NA	C	Y	C	T	C	C	T	C	C	T	T	Y	T	T	T	N	C	T	T	T	T	T	T	T	T	T	C	C	C	C	C	T	T	T	T	T	T	T	T
AX-95008462	C/G	1A	139290759	+	NA	NA	NA	NA	NA	NA	C	C	C	C	C	C	C	N	C	C	C	C	C	C	C	C	C	C	C	C	G	C	C	S	C	C	C	C	C	C	C	G	C	C	G	S	C	G	C
AX-111120968	T/G	1A	139496790	+	NA	NA	NA	NA	NA	NA	T	T	G	T	T	T	T	G	T	T	T	K	T	T	T	T	G	T	T	T	T	T	T	T	T	T	G	G	G	G	G	T	T	T	T	T	T	T	T
AX-95200935	A/C	1A	143196079	+	NA	NA	NA	NA	NA	NA	A	A	A	A	A	A	A	A	A	A	A	A	A	A	A	A	A	A	A	A	C	A	A	C	A	A	A	A	A	A	A	C	A	A	C	C	A	C	A
AX-110835160	G/A	1A	144387370	+	NA	NA	NA	NA	NA	NA	G	G	G	G	G	G	G	A	G	G	G	R	G	G	G	G	A	G	G	G	G	G	G	G	G	G	A	N	A	A	A	G	G	G	G	G	G	G	G
AX-94434525	G/A	1A	144387370	+	NA	NA	NA	NA	NA	NA	G	G	G	G	G	G	G	R	G	G	G	A	G	G	G	G	R	G	G	G	G	G	G	G	G	G	A	R	A	N	R	G	G	G	G	G	G	G	G
AX-109043743	T/G	1A	144408345	+	NA	NA	NA	NA	NA	NA	T	T	G	T	T	T	T	G	T	T	T	G	T	T	T	T	K	T	T	T	T	T	T	T	T	T	G	K	K	G	K	T	T	T	T	T	T	T	T
AX-112287645	C/T	1A	146507204	+	NA	NA	NA	NA	NA	NA	C	C	T	C	C	C	C	T	C	C	C	T	C	C	C	C	Y	C	C	C	C	C	C	C	C	C	T	Y	Y	T	Y	C	C	C	C	C	C	C	C
AX-179558652	C/T	1A	146507204	+	NA	NA	NA	NA	NA	NA	C	C	T	C	C	C	C	T	C	C	C	T	C	C	C	C	Y	C	C	C	C	C	C	C	C	C	T	Y	Y	T	Y	C	C	C	C	C	C	C	C
AX-109479908	T/C	1A	146584045	+	NA	NA	NA	NA	NA	NA	T	T	C	T	T	T	T	C	T	T	T	C	T	T	T	T	C	T	T	T	T	T	T	T	T	T	C	C	C	C	C	T	T	T	T	T	T	T	T
AX-108974862	C/T	1A	146843914	+	NA	NA	NA	NA	NA	NA	C	C	C	C	C	C	C	T	C	C	C	T	C	C	C	C	T	C	C	C	C	C	C	C	C	C	T	T	T	T	T	C	C	C	C	C	C	C	C
AX-179558950	A/G	1A	147790443	+	NA	NA	NA	NA	NA	NA	A	A	G	A	A	A	A	G	A	A	A	R	A	A	A	A	R	A	A	A	A	A	A	A	A	A	G	R	R	G	R	A	A	A	A	A	A	A	A
AX-95633944	A/G	1A	147790443	+	NA	NA	NA	NA	NA	NA	A	A	G	A	A	A	A	G	A	A	A	G	A	A	A	A	R	A	A	A	A	A	A	A	A	A	G	R	R	G	R	A	A	A	A	A	A	A	A
AX-111674408	G/A	1A	148118933	+	NA	NA	NA	NA	NA	NA	G	G	G	G	G	G	G	A	G	G	G	R	G	G	G	G	R	G	G	G	G	G	N	G	G	G	A	R	R	R	R	G	G	G	G	G	G	G	G
AX-95255893	T/C	1A	148856869	+	NA	NA	NA	NA	NA	NA	T	T	T	T	T	T	T	T	T	T	T	T	T	T	T	T	T	Y	T	T	C	T	T	C	T	T	T	T	T	T	T	C	T	T	C	C	T	C	T
AX-108999030	T/C	1A	148861950	+	NA	NA	NA	NA	NA	NA	T	T	C	T	T	T	T	C	T	T	T	C	T	T	T	T	Y	T	T	T	T	T	T	T	T	T	C	Y	Y	C	Y	T	T	T	T	T	T	T	T
AX-94548892	T/C	1A	149784692	+	NA	NA	NA	NA	NA	NA	T	T	T	T	T	T	T	T	T	T	T	T	T	T	T	T	T	Y	T	T	C	T	T	C	T	T	T	T	T	T	T	C	T	T	C	C	T	C	T
AX-108820788	T/G	1A	149939070	+	NA	NA	NA	NA	NA	NA	T	T	G	T	T	T	T	G	T	T	T	G	T	T	T	T	K	T	T	T	T	T	T	T	T	T	G	K	K	G	K	T	T	T	T	T	T	T	T
AX-111044540	C/T	1A	150531334	+	NA	NA	NA	NA	NA	NA	C	C	C	C	C	C	C	T	C	C	C	T	C	C	C	C	T	C	C	C	C	C	C	C	C	C	T	T	T	T	T	C	C	C	C	C	C	C	C
AX-94897165	G/C	1A	150690098	+	NA	NA	NA	NA	NA	NA	S	S	G	G	G	G	G	G	G	G	G	G	G	S	S	S	S	N	S	S	C	S	S	C	G	C	G	S	C	G	S	C	G	S	C	C	G	C	S
AX-108889133	C/T	1A	151629691	+	NA	NA	NA	NA	NA	NA	C	C	C	C	C	C	C	T	C	C	C	Y	C	C	C	C	N	C	C	C	C	C	C	C	C	C	T	Y	T	T	Y	C	C	C	C	C	C	C	C
AX-86167305	C/T	1A	152070229	+	NA	NA	NA	NA	NA	NA	C	C	T	C	C	C	C	T	C	C	C	N	C	C	C	C	Y	C	C	C	C	C	C	C	C	C	T	Y	Y	T	Y	C	C	C	C	C	C	C	C
AX-86167306	C/T	1A	152070229	+	NA	NA	NA	NA	NA	NA	C	C	T	C	C	C	C	T	C	C	C	T	C	C	C	C	Y	C	C	C	C	C	C	C	C	C	T	Y	Y	T	Y	C	C	C	C	C	C	C	C
AX-111066985	C/T	1A	152955230	+	NA	NA	NA	NA	NA	NA	C	C	C	C	C	C	C	T	C	C	C	T	C	C	C	C	T	C	C	C	C	C	C	C	C	C	T	T	T	T	T	C	C	C	C	C	C	C	C
AX-95174321	G/C	1A	152961275	+	NA	NA	NA	NA	NA	NA	G	G	G	G	G	G	G	G	G	G	G	G	G	G	G	G	G	G	G	G	C	G	G	S	G	N	G	G	G	G	G	C	G	G	C	S	G	C	G
AX-94665889	C/T	1A	152962356	+	NA	NA	NA	NA	NA	NA	C	N	N	C	C	C	C	C	C	C	C	C	C	C	C	N	C	Y	C	C	T	C	C	T	C	C	C	C	Y	C	C	T	C	C	T	T	C	T	C
AX-111093204	A/G	1A	153327118	+	NA	NA	NA	NA	NA	NA	A	A	A	A	A	A	A	G	A	A	A	R	A	A	A	A	R	A	A	A	A	A	A	A	A	A	G	R	R	G	R	A	A	A	A	A	A	A	A
AX-109511928	T/G	1A	153598237	+	NA	NA	NA	NA	NA	NA	T	T	G	T	T	T	T	G	T	T	T	K	T	T	T	T	K	T	T	T	T	T	T	T	T	T	G	K	K	G	K	T	T	T	T	T	T	T	T
AX-109565576	T/G	1A	154761756	+	NA	NA	NA	NA	NA	NA	T	T	T	T	T	T	T	G	T	T	T	K	T	T	T	T	N	T	T	T	T	T	T	T	T	T	G	K	K	G	K	T	T	T	T	T	T	T	T
AX-109083824	A/G	1A	156092572	+	NA	NA	NA	NA	NA	NA	A	A	A	A	A	A	A	G	A	A	A	G	A	A	A	A	R	A	A	A	A	A	A	A	A	A	G	R	R	G	R	A	A	A	A	A	A	A	A
AX-179476721	C/T	1A	156265575	+	NA	NA	NA	NA	NA	NA	C	C	C	C	C	C	C	T	C	C	C	N	C	C	C	C	T	C	C	C	C	C	C	C	C	C	T	T	T	T	T	C	C	C	C	C	C	C	C
AX-95683884	A/G	1A	156266697	+	NA	NA	NA	NA	NA	NA	A	A	G	A	A	A	A	G	R	A	A	R	A	A	A	A	R	A	A	A	A	A	A	A	A	A	G	R	R	G	R	A	A	A	A	A	A	A	A
AX-86173025	C/T	1A	156267423	+	NA	NA	NA	NA	NA	NA	C	C	C	C	C	C	C	T	C	C	C	N	C	C	C	C	Y	C	C	C	C	N	C	C	C	C	Y	Y	Y	T	Y	C	C	C	C	N	C	C	C
AX-110058881	G/A	1A	156326753	+	NA	NA	NA	NA	NA	NA	G	G	G	G	G	G	G	A	G	G	G	R	G	G	G	G	R	G	G	G	G	G	G	G	G	G	A	R	R	A	R	G	G	G	G	G	G	G	G
AX-94784779	T/C	1A	156901855	+	NA	NA	NA	NA	NA	NA	T	T	T	T	T	T	T	T	T	T	T	T	T	T	T	T	T	Y	T	T	C	T	T	C	T	T	T	T	T	T	T	C	T	T	C	C	T	C	T
AX-112287115	G/A	1A	156901991	+	NA	NA	NA	NA	NA	NA	G	G	G	G	G	G	G	G	G	G	G	G	G	G	G	N	G	R	G	G	A	G	G	A	G	N	G	G	A	G	N	A	G	G	A	A	G	A	G
AX-89457882	G/A	1A	156901991	+	NA	NA	NA	NA	NA	NA	G	G	G	G	G	G	G	G	G	G	G	G	G	G	G	G	G	R	G	G	A	G	G	A	G	G	G	G	A	G	G	N	G	G	A	A	G	A	G
AX-94445757	A/C	1A	157046560	+	NA	NA	NA	NA	NA	NA	A	A	A	A	A	A	A	A	A	A	A	A	A	A	A	A	A	M	A	A	C	A	A	C	A	A	A	A	A	A	A	C	A	A	C	C	A	C	A
AX-94460427	G/A	1A	159047915	+	NA	NA	NA	NA	NA	NA	G	G	A	A	A	A	G	A	G	G	A	G	A	G	G	G	G	G	G	G	A	G	G	G	A	G	G	N	R	N	N	G	A	G	A	G	A	A	G
AX-109363703	G/A	1A	160126208	+	NA	NA	NA	NA	NA	NA	G	G	G	G	G	G	G	A	G	G	G	A	G	G	G	G	R	G	G	G	G	G	G	G	G	G	A	R	R	A	R	G	G	G	G	G	G	G	G
AX-111503959	C/T	1A	161040655	+	NA	NA	NA	NA	NA	NA	C	C	C	C	C	C	C	T	C	C	C	T	C	C	C	C	T	C	C	C	C	C	C	C	C	C	T	T	T	T	T	C	C	C	C	C	C	C	C
AX-109307763	C/A	1A	162127431	+	NA	NA	NA	NA	NA	NA	C	C	C	C	C	C	C	A	C	C	C	M	C	C	C	C	A	C	C	C	C	C	C	C	C	C	A	N	A	A	A	C	C	C	C	C	C	C	C
AX-110678504	G/A	1A	162265906	+	NA	NA	NA	NA	NA	NA	G	G	G	G	G	G	G	A	G	G	G	A	G	G	G	G	R	G	G	G	G	G	G	G	G	G	A	R	R	A	R	G	G	G	G	G	G	G	G
AX-110989086	A/C	1A	162333695	+	NA	NA	NA	NA	NA	NA	A	A	A	A	A	A	A	C	A	A	A	N	A	A	A	A	M	A	A	A	A	A	A	A	A	A	C	M	M	C	M	A	A	A	A	A	A	A	A
AX-109989391	C/T	1A	162341868	+	NA	NA	NA	NA	NA	NA	C	C	C	C	C	C	C	T	C	C	C	Y	C	C	C	C	Y	C	C	C	C	C	C	C	C	C	T	Y	Y	T	Y	C	C	C	C	C	C	C	C
AX-109380415	C/T	1A	162913742	+	NA	NA	NA	NA	NA	NA	C	C	C	C	C	C	C	T	C	C	C	T	C	C	C	C	Y	C	C	C	C	C	C	C	C	C	T	Y	Y	T	Y	C	C	C	C	C	C	C	C
AX-109631829	T/C	1A	164505623	+	NA	NA	NA	NA	NA	NA	T	T	T	T	T	T	T	C	T	T	T	C	T	T	T	T	Y	T	T	T	T	T	T	T	T	T	C	Y	Y	C	Y	T	T	T	T	T	T	T	T
AX-110938079	A/G	1A	164514921	+	NA	NA	NA	NA	NA	NA	A	A	G	A	A	A	A	G	A	A	A	N	A	A	A	A	G	A	A	A	A	A	A	A	A	A	G	G	G	G	G	A	A	A	A	A	A	A	A
AX-112289442	G/T	1A	164679180	+	NA	NA	NA	NA	NA	NA	K	K	T	G	G	G	G	T	G	G	G	T	G	K	N	K	T	G	K	K	G	K	K	N	G	G	T	T	T	T	T	G	G	K	G	G	G	G	K
AX-95679601	G/T	1A	164679180	+	NA	NA	NA	NA	NA	NA	G	G	T	G	G	G	G	T	G	G	G	T	G	G	G	G	K	G	G	G	G	G	G	G	G	G	T	K	K	T	K	G	G	G	G	G	G	G	G
AX-108729517	T/C	1A	166449216	+	NA	NA	NA	NA	NA	NA	T	T	T	T	T	T	T	C	T	T	T	Y	T	T	T	T	C	T	T	T	T	T	N	T	T	T	C	C	C	C	C	T	T	T	T	T	T	T	T
AX-94521615	A/C	1A	166486884	+	NA	NA	NA	NA	NA	NA	A	A	C	A	A	A	A	C	A	A	A	N	A	A	A	A	M	A	A	A	A	A	A	A	A	A	C	M	M	C	M	A	A	A	A	A	A	A	A
AX-109511783	A/G	1A	166487074	+	NA	NA	NA	NA	NA	NA	A	A	A	A	A	A	A	G	A	A	A	N	A	A	A	A	R	A	A	A	A	A	A	A	A	A	G	R	R	N	R	A	A	A	A	A	A	A	A
AX-94601275	A/G	1A	166487074	+	NA	NA	NA	NA	NA	NA	A	A	A	A	A	A	A	G	A	A	A	R	A	A	A	A	R	A	A	A	A	A	A	A	A	A	G	R	R	G	R	A	A	A	A	A	A	A	A
AX-94668903	G/A	1A	166487688	+	NA	NA	NA	NA	NA	NA	A	A	A	R	A	A	G	A	A	N	R	A	R	R	R	R	A	G	R	R	G	R	R	G	G	G	A	A	A	A	A	G	R	R	G	G	R	G	R
AX-86163943	C/T	1A	166488165	+	NA	NA	NA	NA	NA	NA	N	C	C	C	C	C	C	C	C	C	C	C	C	C	C	C	C	N	C	C	T	C	C	T	C	N	C	C	C	C	N	T	C	C	T	T	C	T	C
AX-111525147	C/T	1A	167619062	+	NA	NA	NA	NA	NA	NA	C	C	T	C	C	C	C	T	C	C	C	T	C	C	C	C	Y	C	C	C	C	C	C	C	C	C	T	Y	Y	T	Y	C	C	C	C	C	C	C	C
AX-95634558	C/T	1A	167619062	+	NA	NA	NA	NA	NA	NA	Y	Y	T	C	C	C	C	T	C	C	C	T	C	Y	Y	N	T	C	Y	Y	C	Y	Y	N	C	C	T	T	T	T	T	C	C	Y	C	C	C	C	Y
AX-109270203	G/A	1A	167739898	+	NA	NA	NA	NA	NA	NA	G	G	G	G	G	G	G	A	G	G	G	R	G	G	G	G	R	G	G	G	G	G	G	G	G	G	N	R	R	A	R	G	G	G	G	G	G	G	G
AX-109637483	A/G	1A	169095501	+	NA	NA	NA	NA	NA	NA	A	A	A	A	A	A	A	G	A	A	A	N	A	A	A	A	G	A	A	A	A	A	A	A	A	A	G	G	G	G	G	A	A	A	A	A	A	A	A
AX-109006984	G/C	1A	169906045	+	NA	NA	NA	NA	NA	NA	G	G	G	G	G	G	G	C	G	N	G	C	G	G	G	G	S	G	G	G	G	G	G	G	G	G	C	S	S	C	S	G	G	G	G	G	G	G	G
AX-111175951	G/T	1A	171000230	+	NA	NA	NA	NA	NA	NA	G	G	G	G	G	G	G	T	G	G	G	G	G	G	G	G	K	G	G	G	G	N	G	G	G	G	N	G	K	N	K	G	G	G	G	G	G	G	G
AX-179558860	G/T	1A	171000230	+	NA	NA	NA	NA	NA	NA	G	G	G	G	G	G	G	K	G	G	G	K	G	G	G	G	K	G	G	G	G	G	G	G	G	G	T	K	T	N	K	G	G	G	G	G	G	G	G
AX-111811057	A/G	1A	171148210	+	NA	NA	NA	NA	NA	NA	A	A	A	A	A	A	A	G	A	A	A	R	A	A	A	A	R	A	A	A	A	A	A	A	A	A	G	R	R	G	R	A	A	A	A	A	A	A	A
AX-110481112	G/T	1A	172134964	+	NA	NA	NA	NA	NA	NA	G	G	G	G	G	G	G	T	G	G	G	K	G	G	G	G	K	G	G	G	G	G	G	G	G	G	T	K	K	T	K	G	G	G	G	G	G	G	G
AX-111719498	T/A	1A	172365804	+	NA	NA	NA	NA	NA	NA	T	T	T	T	T	T	T	A	T	T	T	N	T	T	T	T	W	T	T	T	T	T	T	T	T	T	A	W	W	A	W	T	T	T	T	T	T	T	T
AX-110643294	C/T	1A	172367590	+	NA	NA	NA	NA	NA	NA	C	C	C	C	C	C	C	T	C	C	C	Y	C	C	C	C	Y	C	C	C	C	C	C	C	C	C	T	Y	Y	T	Y	C	C	C	C	C	C	C	C
AX-109415621	A/G	1A	172375797	+	NA	NA	NA	NA	NA	NA	A	A	A	A	A	A	A	G	A	A	A	N	A	A	A	A	G	A	A	A	A	A	A	A	A	A	G	G	G	G	G	A	A	A	A	A	A	A	A
AX-109338066	A/G	1A	172380111	+	NA	NA	NA	NA	NA	NA	A	A	G	A	A	A	A	G	A	A	A	G	A	A	A	A	G	A	A	A	A	A	A	A	A	A	G	G	G	G	G	A	A	A	A	A	A	A	A
AX-110366293	G/T	1A	174188021	+	NA	NA	NA	NA	NA	NA	G	G	G	G	G	G	G	T	G	G	G	N	G	G	G	G	T	G	G	G	G	G	G	G	G	G	T	T	T	T	T	G	G	G	G	G	G	G	G
AX-109829012	G/A	1A	175009650	+	NA	NA	NA	NA	NA	NA	G	G	A	G	G	G	G	A	G	G	G	N	G	G	G	G	R	G	G	G	G	G	G	G	G	G	A	R	R	A	R	G	G	G	G	G	G	G	G
AX-110382803	T/C	1A	175031574	+	NA	NA	NA	NA	NA	NA	T	T	C	T	T	T	T	C	T	T	T	C	T	T	T	T	Y	T	T	T	T	T	T	T	T	T	C	Y	Y	C	Y	T	T	T	T	T	T	T	T
AX-108893516	A/G	1A	175317055	+	NA	NA	NA	NA	NA	NA	A	A	G	A	A	A	A	G	A	A	A	G	A	A	A	A	R	A	A	A	A	A	A	A	A	A	G	R	R	G	R	A	A	A	A	A	A	A	A
AX-108895315	T/C	1A	175656992	+	NA	NA	NA	NA	NA	NA	T	T	C	T	T	T	T	C	T	T	T	N	T	T	T	T	Y	T	T	T	T	T	T	T	T	T	C	Y	Y	C	Y	T	T	T	T	T	T	T	T
AX-108868887	T/C	1A	176013123	+	NA	NA	NA	NA	NA	NA	T	T	C	T	T	T	T	C	T	T	T	C	T	T	T	T	Y	T	T	T	T	T	T	T	T	T	C	Y	Y	C	Y	T	T	T	T	T	T	T	T
AX-108916271	G/A	1A	177057695	+	NA	NA	NA	NA	NA	NA	G	G	G	G	G	G	G	A	G	G	G	A	G	G	G	G	R	G	G	G	G	G	G	G	G	G	A	R	R	A	R	G	G	G	G	G	G	G	G
AX-94788718	T/C	1A	178859572	+	NA	NA	NA	NA	NA	NA	Y	Y	C	T	C	C	T	C	C	T	T	C	T	T	T	T	Y	T	T	T	T	T	T	T	T	T	C	Y	Y	C	Y	T	T	T	T	T	T	T	T
AX-179477387	G/A	1A	178863681	+	NA	NA	NA	NA	NA	NA	G	G	N	G	G	G	G	A	G	G	G	R	G	G	G	G	R	G	G	G	G	G	G	G	G	G	A	R	R	A	R	G	G	G	G	G	G	G	G
AX-112288580	C/T	1A	178864672	+	NA	NA	NA	NA	NA	NA	Y	Y	C	C	C	C	C	T	C	C	C	Y	C	C	C	C	T	C	C	C	C	C	C	C	C	C	T	T	T	T	T	C	C	C	C	C	C	C	C
AX-179561217	C/T	1A	178864672	+	NA	NA	NA	NA	NA	NA	C	C	C	C	C	C	C	T	C	C	C	Y	C	C	C	C	Y	C	C	C	C	C	C	C	C	Y	T	Y	Y	T	Y	C	C	C	C	C	C	C	C
AX-110613085	G/A	1A	179099230	+	NA	NA	NA	NA	NA	NA	G	G	G	G	G	G	G	A	G	G	G	A	G	G	G	G	R	G	G	G	G	G	G	G	G	G	A	R	R	A	R	G	G	G	G	G	G	G	G
AX-109588082	C/G	1A	179167679	+	NA	NA	NA	NA	NA	NA	C	C	C	C	C	C	C	G	C	C	C	S	C	C	C	C	S	C	C	C	C	C	C	C	C	C	G	S	S	G	S	C	C	C	C	C	C	C	C
AX-111286022	C/T	1A	179294839	+	NA	NA	NA	NA	NA	NA	C	C	C	C	C	C	C	T	C	C	C	Y	C	C	C	C	Y	C	C	C	C	C	C	C	C	C	T	Y	Y	T	Y	C	C	C	C	C	C	C	C
AX-109954566	G/A	1A	181548739	+	NA	NA	NA	NA	NA	NA	G	G	A	G	G	G	G	A	G	G	G	R	G	G	G	G	A	G	G	G	G	G	G	G	G	G	A	A	A	A	A	G	G	G	G	G	G	G	G
AX-111619451	A/G	1A	181768467	+	NA	NA	NA	NA	NA	NA	R	R	G	A	G	G	A	G	G	A	A	N	A	A	A	N	R	A	A	A	A	A	A	A	A	A	G	R	R	G	R	A	A	A	A	A	A	A	A
AX-109379649	T/C	1A	183240824	+	NA	NA	NA	NA	NA	NA	T	T	T	T	T	T	T	C	T	T	T	C	T	T	T	T	C	T	T	T	T	T	T	T	T	T	C	C	C	C	C	T	T	T	T	T	T	T	T
AX-112289750	G/T	1A	183426172	+	NA	NA	NA	NA	NA	NA	G	G	G	G	G	G	G	K	G	G	G	N	G	G	G	G	K	G	G	G	G	G	G	G	G	G	T	K	K	K	K	G	G	G	G	G	G	G	G
AX-179559034	G/T	1A	183426172	+	NA	NA	NA	NA	NA	NA	G	G	G	G	G	G	G	T	G	G	G	N	G	G	G	G	T	G	G	G	G	G	G	G	G	G	T	N	T	T	T	G	G	G	G	G	G	G	G
AX-110009746	A/G	1A	183504527	+	NA	NA	NA	NA	NA	NA	A	A	G	A	A	A	A	G	A	A	A	G	A	A	A	A	R	A	A	A	A	A	A	A	A	A	G	R	R	G	R	A	A	A	A	A	A	A	A
AX-112287662	A/G	1A	183532703	+	NA	NA	NA	NA	NA	NA	A	A	G	A	A	A	A	G	A	A	A	G	A	A	A	A	R	A	A	A	A	A	A	A	A	A	G	R	R	G	R	A	A	A	A	A	A	A	A
AX-110164804	C/T	1A	183611835	+	NA	NA	NA	NA	NA	NA	C	C	C	C	C	C	C	T	C	C	C	T	C	C	C	C	Y	C	C	C	C	C	C	C	C	C	T	Y	Y	T	Y	C	C	C	C	C	C	C	C
AX-110694258	G/T	1A	183707051	+	NA	NA	NA	NA	NA	NA	G	G	G	G	G	G	G	T	G	G	G	T	G	G	G	G	K	G	G	G	G	G	G	G	G	G	T	K	K	T	K	G	G	G	G	G	G	G	G
AX-111213190	A/G	1A	184604292	+	NA	NA	NA	NA	NA	NA	A	A	G	A	A	A	A	G	A	A	A	N	A	A	A	A	R	A	A	A	A	A	A	A	A	A	G	R	R	G	R	A	A	A	A	A	A	A	A
AX-109487391	T/C	1A	186433978	+	NA	NA	NA	NA	NA	NA	T	T	C	T	T	T	T	C	T	T	T	N	T	T	T	T	C	T	T	T	T	T	T	T	T	T	C	C	C	C	C	T	T	T	T	T	T	T	T
AX-111802971	A/G	1A	187960617	+	NA	NA	NA	NA	NA	NA	A	A	G	A	A	A	A	G	A	A	A	N	A	A	A	A	R	A	A	A	A	A	A	A	A	A	G	R	R	G	R	A	A	A	A	A	A	A	A
AX-109460609	T/C	1A	188035542	+	NA	NA	NA	NA	NA	NA	T	T	C	T	T	T	T	C	T	T	T	C	T	T	T	T	Y	T	T	T	T	T	T	T	T	T	C	Y	Y	C	Y	T	T	T	T	T	T	T	T
AX-111005005	G/C	1A	188308362	+	NA	NA	NA	NA	NA	NA	G	G	G	G	G	G	G	C	G	G	G	C	G	G	G	G	S	G	G	G	G	G	G	G	G	G	C	S	S	C	S	G	G	G	G	G	G	G	G
AX-110036251	T/C	1A	188371730	+	NA	NA	NA	NA	NA	NA	T	T	C	T	T	T	T	C	T	T	T	N	T	T	T	T	Y	T	T	T	T	T	T	T	T	T	C	Y	Y	C	Y	T	T	T	T	T	T	T	T
AX-94594465	T/C	1A	188431582	+	NA	NA	NA	NA	NA	NA	T	T	T	T	T	T	T	C	T	T	T	C	T	T	T	T	Y	T	T	T	T	T	T	T	T	T	C	Y	Y	C	Y	T	T	T	T	T	T	T	T
AX-111492368	G/A	1A	188744970	+	NA	NA	NA	NA	NA	NA	G	G	G	G	G	G	G	A	G	G	G	N	G	G	G	G	R	G	G	G	G	G	G	G	G	G	A	R	R	A	R	G	G	G	G	G	G	G	G
AX-94415704	G/A	1A	189645579	+	NA	NA	NA	NA	NA	NA	G	G	A	G	G	G	G	A	G	G	G	A	G	G	G	G	R	G	G	G	G	G	G	G	G	G	A	R	R	A	R	G	G	G	G	G	G	G	G
AX-95170825	G/C	1A	198290705	+	NA	NA	NA	NA	NA	NA	G	G	G	G	G	G	G	C	G	G	G	S	G	G	G	G	S	G	G	G	G	G	G	G	G	G	C	S	S	C	S	G	G	G	G	G	G	G	G
AX-111830704	C/G	1A	198322068	+	NA	NA	NA	NA	NA	NA	C	C	C	C	C	C	C	G	C	C	C	G	C	C	C	C	G	C	C	C	C	C	C	C	C	C	G	G	G	G	G	C	C	C	C	C	C	C	C
AX-109974584	A/C	1A	198545319	+	NA	NA	NA	NA	NA	NA	A	A	C	A	A	A	A	C	A	A	A	N	A	A	A	A	M	A	A	A	A	A	A	A	A	A	C	M	M	C	M	A	A	A	A	A	A	A	A
AX-108973273	A/G	1A	202668219	+	NA	NA	NA	NA	NA	NA	A	A	A	A	A	A	A	G	A	A	A	N	A	A	A	A	G	A	A	A	A	A	A	A	A	A	G	G	G	G	G	A	A	A	A	A	A	A	A
AX-86171318	C/T	1A	202960600	+	NA	NA	NA	NA	NA	NA	C	C	C	C	C	C	C	T	C	C	C	N	C	C	C	C	Y	C	C	C	C	C	C	C	C	C	T	Y	Y	T	Y	C	C	C	C	C	C	C	C
AX-111856650	C/T	1A	202962410	+	NA	NA	NA	NA	NA	NA	C	C	C	C	C	C	C	Y	C	C	C	T	C	C	C	C	Y	C	C	C	C	C	C	C	C	C	T	Y	Y	Y	Y	C	C	C	C	C	C	C	C
AX-179561166	C/T	1A	202962410	+	NA	NA	NA	NA	NA	NA	C	C	C	C	C	C	C	T	C	C	C	N	C	C	C	C	Y	C	C	C	C	C	C	C	C	C	T	Y	Y	T	Y	C	C	C	C	C	C	C	C
AX-110574907	G/A	1A	204595473	+	NA	NA	NA	NA	NA	NA	G	G	G	G	G	G	G	G	G	G	G	G	G	G	G	G	G	G	R	G	G	G	N	G	G	G	G	G	G	G	G	R	G	G	G	R	G	G	G
AX-109033129	C/T	1A	204865526	+	NA	NA	NA	NA	NA	NA	C	C	C	C	C	C	C	T	C	C	C	Y	C	C	C	C	Y	C	C	C	C	C	C	C	C	C	T	Y	Y	T	Y	C	C	C	C	C	C	C	C
AX-111055901	G/A	1A	205179237	+	NA	NA	NA	NA	NA	NA	G	G	G	G	G	G	G	A	G	G	G	R	G	G	G	G	R	G	G	G	G	G	N	G	G	G	A	R	R	A	R	G	G	G	G	G	G	G	G
AX-109589983	G/A	1A	205238995	+	NA	NA	NA	NA	NA	NA	G	G	G	G	G	G	G	A	G	G	G	N	G	G	G	G	R	G	G	G	G	G	G	G	G	G	A	R	R	A	R	G	G	G	G	G	G	G	G
AX-95159518	T/C	1A	206086562	+	NA	NA	NA	NA	NA	NA	T	T	T	T	T	T	T	N	T	T	T	Y	T	T	T	T	Y	T	T	T	T	T	T	T	T	T	C	Y	Y	C	Y	T	T	T	T	T	T	T	T
AX-94522292	G/A	1A	206086709	+	NA	NA	NA	NA	NA	NA	G	G	A	G	G	G	G	N	G	G	G	N	G	G	G	G	R	G	G	G	G	G	G	G	G	G	A	R	R	A	R	G	G	G	G	G	G	G	G
AX-109608313	G/C	1A	207186289	+	NA	NA	NA	NA	NA	NA	G	G	C	G	G	G	G	C	G	G	G	N	G	G	G	G	S	G	G	G	G	G	G	G	G	G	C	S	S	C	S	G	G	G	G	G	G	G	G
AX-111218406	A/T	1A	208480196	+	NA	NA	NA	NA	NA	NA	A	A	A	A	A	A	A	T	A	A	A	W	A	A	A	A	W	A	A	A	A	A	A	A	A	A	T	W	W	T	W	A	A	A	A	A	A	A	A
AX-108750341	C/T	1A	209472214	+	NA	NA	NA	NA	NA	NA	C	C	C	C	C	C	C	T	C	C	C	Y	C	C	C	C	Y	C	C	C	C	C	C	C	C	C	T	Y	Y	T	Y	C	C	C	C	C	C	C	C
AX-110962027	G/A	1A	209473552	+	NA	NA	NA	NA	NA	NA	G	G	G	G	G	G	G	A	G	G	G	A	G	G	G	G	R	G	G	G	G	G	G	G	G	G	A	R	R	A	R	G	G	G	G	G	G	G	G
AX-109299772	A/G	1A	209485569	+	NA	NA	NA	NA	NA	NA	A	A	G	A	A	A	A	G	A	A	A	G	A	A	A	A	G	A	A	A	A	A	A	A	A	A	G	G	G	G	G	A	A	A	A	A	A	A	A
AX-95629529	C/T	1A	209486365	+	NA	NA	NA	NA	NA	NA	C	C	T	C	C	C	C	T	C	C	C	T	C	C	C	C	Y	C	C	C	C	C	C	C	C	C	T	Y	Y	T	Y	C	C	C	C	C	C	C	C
AX-94793337	G/A	1A	210014688	+	NA	NA	NA	NA	NA	NA	G	G	N	G	A	G	G	G	G	G	G	A	G	G	G	N	G	G	G	G	G	G	G	A	G	G	G	G	R	G	G	G	G	G	G	G	G	G	G
AX-179476625	A/G	1A	210015987	+	NA	NA	NA	NA	NA	NA	A	A	A	A	A	A	A	G	A	A	A	R	A	A	A	A	R	A	A	A	A	A	A	A	A	A	G	R	R	G	G	A	A	A	A	A	A	A	A
AX-95085503	A/G	1A	210015987	+	NA	NA	NA	NA	NA	NA	A	A	A	A	A	A	A	G	A	A	A	R	A	A	A	A	R	A	A	A	A	A	A	A	A	A	G	R	R	N	R	A	A	A	A	A	A	A	A
AX-108851566	T/C	1A	210856915	+	NA	NA	NA	NA	NA	NA	T	T	C	T	T	T	T	C	T	T	T	N	T	T	T	T	Y	T	T	T	T	T	T	T	T	T	C	Y	Y	C	Y	T	T	T	T	T	T	T	T
AX-110065421	A/C	1A	225020323	+	NA	NA	NA	NA	NA	NA	A	A	A	A	A	A	A	C	A	A	A	M	A	A	A	A	C	A	A	N	A	N	A	M	A	A	C	C	C	C	C	A	A	A	A	M	A	A	A
AX-95662086	A/C	1A	225020323	+	NA	NA	NA	NA	NA	NA	A	A	A	A	A	A	A	C	A	A	A	M	A	A	A	A	C	A	A	A	M	A	A	M	A	A	C	C	C	C	C	M	A	A	M	M	A	M	A
AX-110721297	T/G	1A	225985972	+	NA	NA	NA	NA	NA	NA	T	T	T	T	T	T	T	G	T	T	T	K	T	T	T	T	K	T	T	T	T	T	T	T	T	T	N	K	K	G	K	T	T	T	T	T	T	T	T
AX-111077837	A/G	1A	225990066	+	NA	NA	NA	NA	NA	NA	A	A	G	A	A	A	A	G	A	A	A	R	A	A	A	A	R	A	A	A	A	A	A	A	A	A	G	R	R	G	R	R	A	A	A	A	A	A	A
AX-95683974	G/A	1A	226251321	+	NA	NA	NA	NA	NA	NA	G	G	G	G	G	G	G	A	G	G	G	R	G	G	G	G	A	G	G	G	G	G	G	G	G	G	A	A	A	A	A	G	G	G	G	G	G	G	G
AX-94911243	G/C	1A	228009289	+	NA	NA	NA	NA	NA	NA	S	S	C	C	G	G	G	C	G	G	C	C	G	C	C	S	S	G	C	S	G	S	S	S	G	C	G	C	S	C	C	C	C	S	G	S	C	G	S
AX-112290444	C/T	1A	228009607	+	NA	NA	NA	NA	NA	NA	N	N	T	C	C	C	C	C	C	C	C	C	C	N	N	N	N	C	N	N	C	N	N	N	C	C	C	N	N	C	N	C	C	N	T	N	C	C	N
AX-89419502	C/T	1A	228009607	+	NA	NA	NA	NA	NA	NA	C	C	T	C	C	C	C	C	C	C	C	C	C	C	C	C	C	C	T	C	C	C	T	C	C	C	C	C	C	C	C	C	C	T	T	C	C	C	T
AX-111604825	T/C	1A	229409375	+	NA	NA	NA	NA	NA	NA	T	T	T	T	T	T	T	C	T	T	T	Y	T	T	T	T	Y	T	T	T	T	T	T	T	T	T	C	Y	Y	C	Y	T	T	T	T	T	T	T	T
AX-110175969	A/G	1A	229862616	+	NA	NA	NA	NA	NA	NA	A	A	G	A	A	A	A	G	A	A	A	R	A	A	A	A	R	A	A	A	A	A	A	A	A	A	G	R	R	G	R	A	A	A	A	A	A	A	A
AX-110737697	A/G	1A	230226969	+	NA	NA	NA	NA	NA	NA	A	A	G	A	A	A	A	G	A	A	A	N	A	A	A	A	R	A	A	A	A	A	A	A	A	A	G	R	R	G	R	A	A	A	A	A	A	A	A
AX-94408930	G/A	1A	230423722	+	NA	NA	NA	NA	NA	NA	G	G	A	G	G	G	G	A	G	G	G	R	G	G	G	G	R	G	G	G	G	G	G	G	G	G	A	R	R	A	G	G	G	G	G	G	G	G	G
AX-179476663	A/G	1A	231534240	+	NA	NA	NA	NA	NA	NA	A	A	A	A	A	A	A	G	A	A	A	R	A	A	A	A	R	A	A	A	A	A	A	A	A	A	G	R	R	G	R	A	A	A	A	A	A	A	A
AX-95661943	A/G	1A	231534240	+	NA	NA	NA	NA	NA	NA	A	A	A	A	A	A	A	R	A	A	A	N	A	A	A	A	R	A	A	A	A	A	A	A	A	A	G	R	R	R	R	A	A	A	A	A	A	A	A
AX-111109611	C/T	1A	232056761	+	NA	NA	NA	NA	NA	NA	C	C	C	C	C	C	C	T	C	C	C	Y	C	C	C	C	Y	C	C	C	C	C	C	C	C	C	T	Y	Y	T	Y	C	C	C	C	C	C	C	C
AX-110002322	G/A	1A	232080661	+	NA	NA	NA	NA	NA	NA	G	G	G	G	G	G	G	A	G	G	G	R	G	G	G	G	A	G	G	G	G	G	G	G	G	G	A	N	A	A	N	G	G	G	G	G	G	G	G
AX-95632863	A/G	1A	232556567	+	NA	NA	NA	NA	NA	NA	A	A	A	A	A	A	A	G	A	A	A	A	A	A	A	A	R	A	A	A	A	A	A	A	A	A	G	R	R	R	R	A	A	A	A	A	A	A	A
AX-109013490	G/A	1A	232562856	+	NA	NA	NA	NA	NA	NA	G	G	G	G	G	G	G	A	G	G	G	N	G	G	G	G	R	G	G	G	G	G	G	G	G	G	A	R	R	A	R	G	G	G	G	G	G	G	G
AX-108798636	A/G	1A	232565023	+	NA	NA	NA	NA	NA	NA	A	A	A	A	A	A	A	G	A	A	A	R	A	A	A	A	G	A	A	A	A	A	A	A	A	A	G	G	G	G	G	A	A	A	A	A	A	A	A
AX-95099834	A/G	1A	232613823	+	NA	NA	NA	NA	NA	NA	A	A	G	A	A	A	A	G	A	A	A	R	A	A	A	A	R	A	A	A	A	A	A	A	A	A	G	R	R	G	R	A	A	A	A	A	A	A	A
AX-110924002	G/C	1A	233435924	+	NA	NA	NA	NA	NA	NA	G	G	G	G	G	G	G	C	G	G	G	S	G	G	G	G	C	G	G	G	G	G	G	G	G	G	C	C	C	C	C	G	G	G	G	G	G	G	G
AX-86172254	T/C	1A	233443747	+	NA	NA	NA	NA	NA	NA	T	T	T	T	T	T	T	Y	T	T	T	Y	T	T	T	T	Y	T	T	T	T	T	T	T	T	T	Y	N	N	Y	Y	T	T	T	T	T	T	T	T
AX-109398109	A/G	1A	234966097	+	NA	NA	NA	NA	NA	NA	A	A	G	A	A	A	A	G	A	A	A	R	A	A	A	A	G	A	A	A	A	A	A	A	A	A	G	G	G	G	G	A	A	A	A	A	A	A	A
AX-111000503	T/A	1A	235903737	+	NA	NA	NA	NA	NA	NA	T	T	T	T	T	T	T	A	T	T	T	N	T	T	T	N	W	T	T	T	T	T	T	T	T	T	A	W	W	A	W	T	T	T	T	T	T	T	T
AX-110157589	G/A	1A	236131938	+	NA	NA	NA	NA	NA	NA	G	G	G	G	G	G	G	A	G	G	G	R	G	G	G	G	R	G	G	G	G	G	G	G	G	G	A	R	R	A	R	G	G	G	G	G	G	G	G
AX-110586734	T/C	1A	236757944	+	NA	NA	NA	NA	NA	NA	T	T	C	T	T	T	T	C	T	T	T	Y	T	T	T	T	Y	T	T	T	T	T	T	T	T	T	C	Y	Y	C	Y	T	T	T	T	T	T	T	T
AX-109396298	A/G	1A	237426919	+	NA	NA	NA	NA	NA	NA	A	A	G	A	A	A	A	G	A	A	A	N	A	A	A	A	R	A	A	A	A	A	A	A	A	A	G	R	R	G	R	A	A	A	A	A	A	A	A
AX-110410722	A/G	1A	237828415	+	NA	NA	NA	NA	NA	NA	A	A	A	A	A	A	A	G	A	A	A	R	A	A	A	A	R	A	A	A	A	A	A	A	A	A	G	R	R	G	R	A	A	A	A	A	A	A	A
AX-111524633	C/T	1A	237943464	+	NA	NA	NA	NA	NA	NA	C	C	C	C	C	C	C	T	C	C	C	N	C	C	C	C	Y	C	C	C	C	C	C	C	C	C	T	Y	Y	T	Y	C	C	C	C	C	C	C	C
AX-110396848	T/C	1A	238373039	+	NA	NA	NA	NA	NA	NA	T	T	T	T	T	T	T	C	T	T	T	Y	T	T	T	T	Y	T	T	T	T	T	T	T	T	T	C	Y	Y	C	Y	T	T	T	T	T	T	T	T
AX-111568418	A/G	1A	239341293	+	NA	NA	NA	NA	NA	NA	A	A	A	A	A	A	A	G	A	A	A	R	A	A	A	A	R	A	A	A	A	A	A	A	A	A	G	R	R	G	R	A	A	A	A	A	A	A	A
AX-179561177	G/A	1A	240780833	+	NA	NA	NA	NA	NA	NA	G	G	G	G	G	G	G	A	G	G	G	R	G	G	G	G	R	G	G	G	G	G	G	G	G	G	A	R	N	A	R	G	G	G	G	G	G	G	G
AX-95683835	G/A	1A	240780833	+	NA	NA	NA	NA	NA	NA	G	G	G	G	G	G	G	A	G	G	G	N	G	G	G	G	R	G	G	G	G	G	G	G	G	G	A	R	R	A	R	G	G	G	G	G	G	G	G
AX-94520045	T/C	1A	241050267	+	NA	NA	NA	NA	NA	NA	T	T	T	T	T	T	T	C	T	T	T	Y	T	T	T	T	Y	T	T	T	T	T	T	T	T	T	C	Y	Y	C	Y	T	T	T	T	T	T	T	T
AX-179560276	A/C	1A	241314773	+	NA	NA	NA	NA	NA	NA	A	A	N	A	A	A	A	C	A	A	A	M	A	A	A	A	C	A	A	A	A	A	A	A	A	A	C	C	C	C	C	A	A	A	A	A	A	A	A
AX-95662265	A/C	1A	241314773	+	NA	NA	NA	NA	NA	NA	A	A	A	A	A	A	A	M	A	A	A	M	A	A	A	A	N	A	A	A	A	A	A	A	A	A	C	M	C	M	M	A	A	A	A	A	A	A	A
AX-95226312	T/C	1A	242626495	+	NA	NA	NA	NA	NA	NA	T	T	T	T	T	T	T	Y	T	T	T	Y	T	T	T	T	Y	T	T	T	T	T	T	T	T	T	C	Y	C	Y	Y	T	T	T	T	T	T	T	T
AX-95685170	T/C	1A	242626495	+	NA	NA	NA	NA	NA	NA	T	T	T	T	T	T	T	C	T	T	T	Y	T	T	T	T	Y	T	T	T	T	T	T	T	T	T	C	Y	Y	C	Y	T	T	T	T	T	T	T	T
AX-94830572	G/A	1A	242925506	+	NA	NA	NA	NA	NA	NA	G	G	G	G	G	G	G	A	G	G	G	N	G	G	G	G	R	G	G	G	G	G	G	G	G	G	A	R	R	A	R	G	G	G	G	G	G	G	G
AX-109476107	T/C	1A	243805158	+	NA	NA	NA	NA	NA	NA	T	T	C	T	T	T	T	C	T	T	T	Y	T	T	T	T	Y	T	T	T	T	T	T	T	T	T	C	Y	Y	C	Y	T	T	T	T	T	T	T	T
AX-108855445	T/C	1A	244196222	+	NA	NA	NA	NA	NA	NA	T	T	C	T	T	T	T	C	T	T	T	Y	T	T	T	T	Y	T	T	T	T	T	T	T	T	T	C	Y	Y	C	Y	T	T	T	T	T	T	T	T
AX-94716446	C/A	1A	244353721	+	NA	NA	NA	NA	NA	NA	C	C	C	C	C	C	C	C	C	C	C	C	C	C	C	C	C	M	C	C	A	C	C	A	C	C	C	C	C	C	C	A	C	C	A	A	C	A	C
AX-110905198	G/T	1A	244395855	+	NA	NA	NA	NA	NA	NA	G	G	G	G	G	G	G	K	G	G	G	K	G	G	G	G	K	G	G	G	G	G	G	G	G	G	T	K	T	K	K	G	G	G	G	G	G	G	G
AX-94972200	T/C	1A	244397525	+	NA	NA	NA	NA	NA	NA	T	T	T	T	T	T	T	Y	T	T	T	C	T	T	T	T	Y	T	T	T	T	T	T	T	T	T	C	Y	C	Y	Y	T	T	T	T	T	T	T	T
AX-86171782	C/T	1A	245472855	+	NA	NA	NA	NA	NA	NA	C	C	C	C	C	C	C	T	C	C	C	Y	C	C	C	C	Y	C	C	C	C	C	C	C	C	C	T	Y	Y	Y	Y	C	C	C	C	C	C	C	C
AX-86171783	C/T	1A	245472855	+	NA	NA	NA	NA	NA	NA	C	C	C	C	C	C	C	T	C	C	C	N	C	C	C	C	Y	C	C	C	C	C	C	C	C	C	Y	Y	Y	T	Y	C	C	C	C	C	C	C	C
AX-95096306	G/C	1A	245473026	+	NA	NA	NA	NA	NA	NA	G	G	G	G	G	G	G	C	G	G	G	S	G	G	G	G	C	G	G	G	G	G	G	G	G	G	C	N	C	C	N	G	G	G	G	G	G	G	G
AX-110592831	A/G	1A	245474756	+	NA	NA	NA	NA	NA	NA	A	A	A	A	A	A	A	G	A	A	A	R	A	A	A	A	R	A	A	A	A	A	A	A	A	A	G	R	R	G	R	A	A	A	A	A	A	A	A
AX-109610470	T/G	1A	245869745	+	NA	NA	NA	NA	NA	NA	T	T	G	T	T	T	T	G	T	T	T	K	T	T	T	T	K	T	T	T	T	T	T	T	T	T	G	K	K	G	K	T	T	T	T	T	T	T	T
AX-110987022	C/T	1A	246557805	+	NA	NA	NA	NA	NA	NA	C	C	C	C	C	C	C	T	C	C	C	Y	C	C	C	C	T	C	C	C	C	C	Y	C	C	C	T	T	T	T	T	C	C	C	C	C	C	C	C
AX-112287880	C/T	1A	247162183	+	NA	NA	NA	NA	NA	NA	Y	Y	C	C	C	C	C	T	C	T	C	C	C	Y	Y	Y	T	T	Y	T	T	N	N	Y	C	C	T	T	Y	T	T	C	C	Y	C	T	C	C	Y
AX-95661240	C/T	1A	247162183	+	NA	NA	NA	NA	NA	NA	Y	T	C	C	C	C	C	C	C	T	C	C	C	T	Y	Y	T	T	N	T	C	N	N	Y	C	C	T	T	T	C	T	C	C	N	C	T	C	C	N
AX-112287823	T/C	1A	247166958	+	NA	NA	NA	NA	NA	NA	T	T	T	T	T	T	T	C	T	Y	T	Y	T	T	T	T	Y	N	T	T	T	T	T	T	T	T	C	Y	Y	C	Y	T	T	T	T	T	N	T	T
AX-94514773	T/C	1A	247166958	+	NA	NA	NA	NA	NA	NA	T	T	T	T	T	T	T	C	T	T	T	C	T	T	T	T	Y	T	T	T	T	T	T	T	T	T	C	Y	Y	C	Y	T	T	T	T	T	T	T	T
AX-179476497	T/G	1A	247193427	+	NA	NA	NA	NA	NA	NA	T	T	T	T	T	T	T	G	T	T	T	T	N	T	T	T	K	T	T	T	T	T	T	T	T	T	K	K	K	G	K	N	T	T	T	T	T	T	T
AX-95660246	T/G	1A	247193427	+	NA	NA	NA	NA	NA	NA	T	T	T	T	T	T	T	G	T	T	T	K	T	T	T	T	K	T	T	T	T	T	T	T	T	T	G	K	K	G	K	T	T	T	T	T	T	T	T
AX-111457627	G/A	1A	247443970	+	NA	NA	NA	NA	NA	NA	G	G	A	G	G	G	G	A	G	G	G	R	G	G	G	G	A	G	G	G	G	G	G	G	G	G	A	A	A	A	A	G	G	G	G	G	G	G	G
AX-111607396	C/T	1A	248771860	+	NA	NA	NA	NA	NA	NA	Y	C	T	C	C	T	C	T	T	C	C	Y	C	C	C	C	Y	C	C	C	C	C	C	C	C	C	T	Y	Y	T	Y	C	C	C	C	C	C	C	C
AX-111240271	C/T	1A	249390780	+	NA	NA	NA	NA	NA	NA	C	C	C	C	C	C	C	T	C	C	C	Y	C	C	C	C	Y	C	C	C	C	C	C	C	C	C	T	Y	Y	T	Y	C	C	C	C	C	C	C	C
AX-110669824	T/G	1A	249393448	+	NA	NA	NA	NA	NA	NA	T	T	G	T	T	T	T	G	T	T	T	K	T	T	T	T	G	T	T	T	T	T	T	T	T	T	G	G	G	G	G	T	T	T	T	T	T	T	T
AX-108782177	C/T	1A	249403983	+	NA	NA	NA	NA	NA	NA	C	C	C	C	C	C	C	T	C	C	C	Y	C	C	C	C	Y	C	C	C	C	C	C	C	C	C	T	Y	Y	T	Y	C	C	C	C	C	C	C	C
AX-110367274	A/G	1A	250110483	+	NA	NA	NA	NA	NA	NA	A	A	G	A	A	A	A	G	A	A	A	R	A	A	A	A	G	A	A	A	A	A	A	A	A	A	G	G	G	G	G	A	A	A	A	A	A	A	A
AX-95660239	A/G	1A	250473695	+	NA	NA	NA	NA	NA	NA	A	A	A	A	A	A	A	G	A	A	A	R	A	A	A	A	G	A	A	A	A	A	A	A	A	A	G	G	G	G	G	A	A	A	A	A	A	A	A
AX-111700010	A/G	1A	251192561	+	NA	NA	NA	NA	NA	NA	A	A	G	A	A	A	A	G	A	A	A	R	A	A	A	A	R	A	A	A	A	A	A	A	A	A	G	R	R	G	R	A	A	A	A	A	A	A	A
AX-95017779	C/T	1A	251826834	+	NA	NA	NA	NA	NA	NA	C	C	C	C	C	C	C	T	C	N	C	Y	C	C	C	C	Y	C	C	C	C	C	C	C	C	C	T	Y	Y	T	Y	C	C	C	C	C	C	C	C
AX-109839299	G/T	1A	252285054	+	NA	NA	NA	NA	NA	NA	G	G	T	G	G	G	G	T	G	G	G	N	G	G	G	G	K	G	G	G	G	G	G	G	G	G	T	K	K	T	K	G	G	G	G	G	G	G	G
AX-110719183	T/C	1A	252820239	+	NA	NA	NA	NA	NA	NA	T	T	C	T	T	Y	T	C	N	T	T	N	T	T	T	T	Y	T	T	T	T	T	T	T	T	T	C	Y	Y	C	Y	T	T	T	T	T	T	T	T
AX-95139577	C/G	1A	253183549	+	NA	NA	NA	NA	NA	NA	S	S	G	G	G	G	C	G	G	N	G	N	G	S	S	S	S	G	S	S	C	C	S	C	C	G	C	C	C	C	C	C	G	S	C	S	C	G	S
AX-111165422	C/T	1A	256029192	+	NA	NA	NA	NA	NA	NA	C	C	C	C	C	C	C	Y	C	C	C	Y	C	C	C	C	Y	C	C	C	C	C	C	C	C	C	T	Y	T	Y	Y	C	C	C	C	C	C	C	C
AX-109441083	T/C	1A	256126472	+	NA	NA	NA	NA	NA	NA	T	T	C	T	T	T	T	C	T	T	T	N	T	T	T	T	C	T	T	T	T	T	T	T	T	T	C	C	C	C	C	T	T	T	T	T	T	T	T
AX-110153438	A/G	1A	257303465	+	NA	NA	NA	NA	NA	NA	R	A	G	A	A	G	A	G	G	A	A	R	A	A	A	A	R	A	A	A	A	A	A	A	A	A	G	R	R	G	R	A	A	A	A	A	A	A	A
AX-86164755	C/T	1A	257729979	+	NA	NA	NA	NA	NA	NA	Y	C	T	C	C	T	C	N	Y	C	C	N	C	C	C	C	Y	C	C	C	C	C	C	C	C	C	Y	Y	Y	N	Y	C	C	C	C	C	C	C	C
AX-86164756	C/T	1A	257729979	+	NA	NA	NA	NA	NA	NA	Y	C	T	C	C	T	C	T	T	C	C	T	C	C	C	C	Y	C	C	C	C	C	C	C	C	C	T	Y	Y	T	Y	C	C	C	C	C	C	C	C
AX-94465726	G/C	1A	258078946	+	NA	NA	NA	NA	NA	NA	S	G	G	G	G	N	G	C	N	G	G	S	G	G	G	G	S	G	G	G	G	G	G	G	G	G	C	S	S	C	S	G	G	G	G	G	G	G	G
AX-109397378	T/G	1A	258084853	+	NA	NA	NA	NA	NA	NA	K	T	G	T	T	G	T	G	G	T	T	K	T	T	T	T	K	T	T	T	T	T	T	T	T	T	G	K	K	G	K	T	T	T	T	T	T	T	T
AX-109107472	C/T	1A	259442428	+	NA	NA	NA	NA	NA	NA	Y	C	C	C	C	T	C	T	T	C	C	Y	C	C	C	C	Y	C	C	C	C	C	C	C	C	C	T	Y	Y	T	Y	C	C	C	C	C	C	C	C
AX-95657264	C/T	1A	260326152	+	NA	NA	NA	NA	NA	NA	T	C	C	C	C	T	C	T	T	C	C	T	C	C	C	C	T	C	C	C	C	C	C	C	C	C	T	Y	T	T	T	C	C	C	C	C	C	C	C
AX-179476732	A/G	1A	260326176	+	NA	NA	NA	NA	NA	NA	R	A	G	A	A	G	A	G	G	A	A	N	A	A	A	A	R	A	A	A	A	A	A	A	A	A	G	R	R	G	R	A	A	A	A	A	A	A	A
AX-95632859	A/G	1A	260326176	+	NA	NA	NA	NA	NA	NA	R	A	G	A	A	G	A	G	G	A	A	N	A	A	A	A	R	A	A	A	A	A	A	A	A	A	G	R	R	G	R	A	A	A	A	A	A	A	A
AX-95253219	A/G	1A	262109222	+	NA	NA	NA	NA	NA	NA	R	G	A	A	A	A	G	A	A	G	A	A	A	G	G	G	R	G	G	G	A	G	G	G	G	G	A	R	N	A	R	G	A	G	A	G	A	A	G
AX-95226421	T/C	1A	262110305	+	NA	NA	NA	NA	NA	NA	C	T	C	T	T	C	T	C	C	T	T	Y	T	T	T	T	C	T	T	T	T	T	T	T	T	T	C	C	C	C	C	T	T	T	T	T	T	T	T
AX-110504333	A/C	1A	263102659	+	NA	NA	NA	NA	NA	NA	C	A	C	A	A	C	A	C	C	A	A	M	A	A	A	A	C	A	A	A	A	A	A	A	A	A	C	C	C	C	C	A	A	A	A	A	A	A	A
AX-112290416	G/T	1A	263117295	+	NA	NA	NA	NA	NA	NA	K	G	T	G	G	T	G	T	T	G	G	K	G	G	G	G	K	G	G	G	G	G	G	G	G	G	T	K	K	T	K	G	G	G	G	G	G	G	G
AX-95679450	G/T	1A	263117295	+	NA	NA	NA	NA	NA	NA	K	G	T	G	G	T	G	T	T	G	G	K	G	G	G	G	K	G	G	G	G	G	G	G	G	G	T	K	T	T	K	G	G	G	G	G	G	G	G
AX-112290443	G/A	1A	263117784	+	NA	NA	NA	NA	NA	NA	R	G	A	G	G	A	G	A	R	G	G	G	G	G	G	G	R	G	G	G	G	G	G	G	G	G	R	N	R	R	N	G	R	G	G	G	G	G	G
AX-86172807	G/A	1A	263118310	+	NA	NA	NA	NA	NA	NA	R	G	A	G	G	A	G	A	A	G	G	R	G	G	G	G	R	G	G	G	G	G	G	G	G	G	A	R	R	A	R	G	G	G	G	G	G	G	G
AX-86172808	G/A	1A	263118310	+	NA	NA	NA	NA	NA	NA	R	G	A	G	G	A	G	A	A	G	G	R	G	G	G	G	R	G	G	G	G	G	G	G	G	G	A	R	R	A	R	G	G	G	G	G	G	G	G
AX-108754837	C/T	1A	263119804	+	NA	NA	NA	NA	NA	NA	Y	C	T	C	C	T	C	T	T	C	C	Y	C	C	C	C	Y	C	C	C	C	C	C	C	C	C	T	Y	N	T	Y	C	C	C	C	C	C	C	C
AX-111513869	C/T	1A	263125457	+	NA	NA	NA	NA	NA	NA	T	C	T	C	C	T	C	T	T	C	C	Y	C	C	C	C	T	C	C	C	C	C	C	C	C	C	T	T	T	T	T	C	C	C	C	C	C	C	C
AX-110421810	G/A	1A	264030278	+	NA	NA	NA	NA	NA	NA	R	G	A	G	G	A	G	A	A	G	G	N	G	G	G	G	R	G	G	G	G	G	G	G	G	G	A	R	N	A	R	G	G	G	G	G	G	G	G
AX-94452312	G/C	1A	264214357	+	NA	NA	NA	NA	NA	NA	S	G	C	G	G	C	G	C	C	G	G	S	G	G	G	G	S	G	G	G	G	G	G	G	G	G	C	S	S	C	S	G	G	G	G	G	G	G	G
AX-94631437	C/T	1A	264577612	+	NA	NA	NA	NA	NA	NA	T	C	T	C	C	T	C	T	T	C	C	Y	C	C	C	C	T	C	C	C	C	C	C	C	C	C	T	T	T	T	T	C	C	C	C	C	C	C	C
AX-110906010	G/A	1A	265663576	+	NA	NA	NA	NA	NA	NA	G	G	G	G	G	G	G	G	G	G	G	G	G	G	G	G	A	G	A	G	G	G	G	G	G	G	G	N	G	A	A	G	G	G	G	A	G	G	G
AX-108948975	T/C	1A	267669471	+	NA	NA	NA	NA	NA	NA	Y	Y	C	T	T	C	T	C	C	T	T	Y	T	T	T	T	T	T	T	T	T	T	T	T	T	T	C	T	Y	T	T	T	T	T	T	T	T	T	T
AX-94480929	A/G	1A	269404229	+	NA	NA	NA	NA	NA	NA	R	R	G	A	A	G	A	G	G	A	A	R	A	A	A	A	A	A	A	A	A	A	A	A	A	A	G	A	R	A	A	A	A	A	A	A	A	A	A
AX-111168439	C/G	1A	270404132	+	NA	NA	NA	NA	NA	NA	S	S	G	C	C	G	C	G	G	C	C	S	C	C	C	C	C	C	C	C	C	C	C	C	C	C	G	C	S	C	C	C	C	C	C	C	C	C	C
AX-109635929	C/T	1A	271365504	+	NA	NA	NA	NA	NA	NA	Y	Y	T	C	C	T	C	T	T	C	C	T	C	C	N	C	C	C	C	C	C	C	C	C	C	C	T	C	Y	C	C	C	C	C	C	C	C	C	C
AX-109824940	T/C	1A	271375898	+	NA	NA	NA	NA	NA	NA	Y	Y	C	T	T	C	T	C	C	T	T	Y	T	T	T	T	T	T	T	T	T	T	T	T	T	T	C	T	Y	T	T	T	T	T	T	T	T	T	T
AX-89424853	G/A	1A	275621234	+	NA	NA	NA	NA	NA	NA	R	R	A	G	G	A	G	A	A	G	G	R	G	G	G	G	G	G	G	G	G	G	G	G	G	G	A	G	R	G	G	G	G	G	G	G	G	G	G
AX-109843062	T/G	1A	276197462	+	NA	NA	NA	NA	NA	NA	K	K	G	T	T	G	T	G	G	T	T	K	T	T	T	T	T	T	T	T	T	T	T	T	T	T	G	T	K	T	T	T	T	T	T	T	T	T	T
AX-111223739	C/A	1A	276369455	+	NA	NA	NA	NA	NA	NA	M	M	A	C	C	A	C	A	A	C	C	M	C	C	C	C	C	C	C	C	C	C	N	C	C	C	A	C	M	C	C	C	C	C	C	C	C	C	C
AX-108797865	T/A	1A	276799442	+	NA	NA	NA	NA	NA	NA	W	N	A	T	T	A	T	A	A	T	T	W	T	T	T	T	T	T	T	T	T	T	T	T	T	T	A	T	W	T	T	T	T	T	T	T	T	T	T
AX-108827668	A/G	1A	276865729	+	NA	NA	NA	NA	NA	NA	G	G	G	A	A	G	A	G	G	A	A	R	A	A	A	A	A	A	A	A	A	A	R	A	A	A	G	A	G	A	A	A	A	A	A	A	A	A	A
AX-94615593	G/A	1A	277426907	+	NA	NA	NA	NA	NA	NA	R	R	A	G	A	A	G	A	A	G	G	A	G	G	G	G	R	G	G	G	G	G	G	G	G	G	G	R	G	A	R	G	G	G	G	G	G	G	G
AX-94705481	C/G	1A	278056387	+	NA	NA	NA	NA	NA	NA	G	G	G	C	G	G	C	G	G	C	C	G	C	C	C	C	G	C	C	C	C	C	C	C	C	C	C	G	C	G	G	C	C	C	C	C	C	C	C
AX-110455706	T/C	1A	278607695	+	NA	NA	NA	NA	NA	NA	Y	Y	C	T	T	C	T	C	C	T	T	Y	T	T	T	T	T	T	T	T	T	T	T	T	T	T	C	T	Y	T	T	T	T	T	T	T	T	T	T
AX-110042323	T/C	1A	279368860	+	NA	NA	NA	NA	NA	NA	Y	Y	C	T	T	C	T	C	C	T	T	Y	T	T	T	T	T	T	T	T	T	T	T	T	T	T	C	T	Y	T	T	T	T	T	T	T	T	T	T
AX-86177877	A/G	1A	280799267	+	NA	NA	NA	NA	NA	NA	R	R	G	A	A	G	A	G	G	A	A	N	A	A	A	A	A	A	A	A	A	A	A	A	A	A	G	A	N	A	A	A	A	A	A	A	A	A	A
AX-86177879	A/G	1A	280799267	+	NA	NA	NA	NA	NA	NA	N	R	G	A	A	G	A	G	G	A	A	R	A	A	A	A	A	A	A	A	A	A	A	A	A	A	G	A	R	A	A	A	A	A	A	A	A	A	A
AX-94399869	A/G	1A	280802266	+	NA	NA	NA	NA	NA	NA	G	G	G	A	A	G	A	G	G	A	A	R	A	A	A	A	A	A	A	A	A	A	A	A	A	A	G	A	G	A	A	A	A	A	A	A	A	A	A
AX-108936390	T/C	1A	281093788	+	NA	NA	NA	NA	NA	NA	Y	Y	C	T	T	C	T	C	C	T	T	Y	T	T	T	T	T	T	T	T	T	T	T	T	T	T	C	T	Y	T	T	T	T	T	T	T	T	T	T
AX-94781823	C/T	1A	283271550	+	NA	NA	NA	NA	NA	NA	Y	Y	T	C	C	T	C	T	T	C	C	T	C	C	C	C	C	C	C	C	C	C	C	C	C	C	T	C	Y	C	C	C	C	C	C	C	C	C	C
AX-95630129	C/T	1A	283271550	+	NA	NA	NA	NA	NA	NA	T	T	T	C	C	T	C	T	T	C	C	Y	C	C	C	C	C	C	C	C	C	C	C	C	C	C	T	C	T	C	C	C	C	C	C	C	C	C	C
AX-109386605	A/G	1A	283746506	+	NA	NA	NA	NA	NA	NA	R	R	G	A	A	G	A	G	G	A	A	R	A	A	A	A	A	A	A	A	N	A	A	A	A	A	G	A	R	A	A	A	A	A	A	A	A	A	A
AX-178076122	T/C	1A	284796426	+	NA	NA	NA	NA	NA	NA	Y	Y	C	T	T	C	T	C	C	T	T	Y	T	T	T	T	T	T	T	T	T	T	T	T	T	T	C	T	Y	T	T	T	T	T	T	T	T	T	T
AX-94581406	T/C	1A	284796426	+	NA	NA	NA	NA	NA	NA	Y	Y	C	T	T	C	T	C	C	T	T	N	T	T	T	T	T	T	T	T	T	T	T	T	T	T	C	T	Y	T	T	T	T	T	T	T	T	T	T
AX-111607240	T/G	1A	285197722	+	NA	NA	NA	NA	NA	NA	K	K	G	T	T	G	T	G	G	T	T	K	T	T	T	T	T	T	T	T	T	T	T	T	T	T	G	T	K	T	T	T	T	T	T	T	T	T	T
AX-95232790	G/A	1A	288208972	+	NA	NA	NA	NA	NA	NA	A	A	A	G	A	A	G	A	A	G	G	R	G	G	G	G	A	G	A	G	G	G	G	G	G	G	G	A	G	A	A	G	G	G	G	G	G	G	G
AX-94585817	T/G	1A	288214476	+	NA	NA	NA	NA	NA	NA	N	N	K	T	K	K	T	T	N	T	T	T	T	K	K	K	G	T	G	K	T	K	K	K	K	T	T	G	T	K	G	T	T	K	T	K	T	T	K
AX-95182518	C/T	1A	288216116	+	NA	NA	NA	NA	NA	NA	T	N	T	C	C	T	C	T	T	C	C	Y	C	C	C	C	C	C	C	C	C	C	C	C	C	C	T	C	T	C	C	C	C	C	C	C	C	C	C
AX-94489656	T/C	1A	288221851	+	NA	NA	NA	NA	NA	NA	Y	Y	N	T	T	C	T	C	C	T	T	N	T	T	T	T	T	T	T	T	T	T	T	T	T	T	C	T	Y	T	T	T	T	T	T	T	T	T	T
AX-108890616	T/G	1A	288612944	+	NA	NA	NA	NA	NA	NA	G	G	G	T	T	G	T	G	G	T	T	K	T	T	T	T	T	T	T	T	T	T	T	T	T	T	G	T	G	T	T	T	T	T	T	T	T	T	T
AX-110969943	G/C	1A	289113477	+	NA	NA	NA	NA	NA	NA	S	S	C	G	G	C	G	C	C	G	G	S	G	G	G	G	G	G	G	G	G	G	G	G	G	G	C	G	S	G	G	G	G	G	G	G	G	G	G
AX-109875791	C/T	1A	293860191	+	NA	NA	NA	NA	NA	NA	T	T	T	C	C	T	C	T	T	C	C	Y	C	C	C	C	C	C	C	C	C	C	C	C	C	C	T	C	T	C	C	C	C	C	C	C	C	C	C
AX-110057169	A/G	1A	298625616	+	NA	NA	NA	NA	NA	NA	R	R	G	A	A	G	A	G	G	A	A	R	A	A	A	A	A	A	A	A	A	A	A	A	A	A	G	A	R	A	A	A	A	A	A	A	A	A	A
AX-108869561	G/A	1A	298646687	+	NA	NA	NA	NA	NA	NA	N	N	A	G	G	A	G	A	A	G	G	N	G	G	G	G	G	G	G	G	G	G	G	G	G	G	A	G	A	G	G	G	G	G	G	G	G	G	G
AX-110174084	A/G	1A	299103038	+	NA	NA	NA	NA	NA	NA	G	G	G	A	A	G	A	G	G	A	A	R	A	A	A	A	A	A	A	A	A	A	A	A	A	A	G	A	G	A	A	A	A	A	A	A	A	A	A
AX-109437723	T/C	1A	300015404	+	NA	NA	NA	NA	NA	NA	Y	Y	C	T	T	C	T	C	C	T	T	Y	T	T	T	T	T	T	T	T	T	T	T	T	T	T	C	T	Y	T	T	T	T	T	T	T	T	T	T
AX-94818544	G/T	1A	300219593	+	NA	NA	NA	NA	NA	NA	K	K	T	G	G	T	G	T	T	G	G	K	G	G	G	G	G	G	G	G	G	G	G	G	G	G	T	G	K	G	G	K	G	G	G	G	G	G	G
AX-109870783	C/T	1A	301370838	+	NA	NA	NA	NA	NA	NA	T	T	T	C	C	T	C	T	T	C	C	Y	C	C	C	C	C	C	C	C	C	C	C	C	C	C	T	C	T	C	C	C	C	C	C	C	C	C	C
AX-110509996	G/C	1A	302508677	+	NA	NA	NA	NA	NA	NA	C	C	C	G	G	C	G	C	C	G	G	S	G	G	G	G	G	G	G	G	G	G	G	G	G	G	C	G	C	G	G	G	G	G	G	G	G	G	G
AX-111127506	T/C	1A	306347124	+	NA	NA	NA	NA	NA	NA	Y	Y	T	T	T	C	T	C	C	T	T	Y	T	T	T	T	T	T	T	T	T	T	T	T	T	T	C	T	Y	T	T	T	T	T	T	T	T	T	T
AX-110955450	A/C	1A	306357347	+	NA	NA	NA	NA	NA	NA	C	C	C	A	C	C	A	C	C	A	A	C	A	A	A	N	C	A	C	A	A	A	A	A	A	C	A	C	C	C	C	A	A	A	A	A	A	A	A
AX-111002326	T/C	1A	306376620	+	NA	NA	NA	NA	NA	NA	Y	Y	T	T	T	C	T	C	C	T	T	Y	T	T	T	T	T	T	T	T	T	T	T	T	T	T	C	T	Y	T	T	T	T	T	T	T	T	T	T
AX-110515579	G/A	1A	306400257	+	NA	NA	NA	NA	NA	NA	A	A	G	G	G	A	G	A	A	G	G	R	G	G	G	G	G	G	G	G	G	G	G	G	G	G	A	G	N	G	G	G	G	G	G	G	G	G	G
AX-111774545	T/C	1A	306489723	+	NA	NA	NA	NA	NA	NA	Y	Y	T	T	C	C	T	C	C	Y	T	Y	T	T	T	T	T	T	T	T	T	T	T	T	T	T	C	T	Y	T	T	T	T	T	T	T	T	T	T
AX-110943762	T/C	1A	306551926	+	NA	NA	NA	NA	NA	NA	C	C	T	T	C	C	T	C	C	T	T	Y	T	T	T	Y	T	T	T	T	T	T	T	T	T	T	C	T	C	T	T	T	T	T	T	T	T	T	T
AX-95089938	T/C	1A	306779729	+	NA	NA	NA	NA	NA	NA	Y	Y	T	T	C	C	T	C	C	T	T	Y	T	T	T	T	T	T	T	T	T	T	T	T	T	T	C	T	Y	T	T	T	T	T	T	T	T	T	T
AX-86178422	C/T	1A	306786560	+	NA	NA	NA	NA	NA	NA	T	T	C	C	T	T	C	T	T	C	C	Y	C	C	C	Y	C	C	C	C	C	C	C	C	C	C	T	C	T	C	C	C	C	C	C	C	C	C	C
AX-86178423	C/T	1A	306786560	+	NA	NA	NA	NA	NA	NA	T	T	C	C	T	T	C	T	T	C	C	Y	C	C	C	Y	C	C	C	C	C	C	C	C	C	C	T	C	T	C	C	C	C	C	C	C	C	C	C
AX-94406568	T/C	1A	306787439	+	NA	NA	NA	NA	NA	NA	Y	Y	T	T	C	C	T	C	C	T	T	Y	T	T	T	T	T	T	T	T	T	T	T	T	T	T	C	T	Y	T	T	T	T	T	T	T	T	T	T
AX-95631434	T/C	1A	306787439	+	NA	NA	NA	NA	NA	NA	Y	Y	T	T	C	C	T	C	C	T	T	C	T	T	T	N	T	T	T	T	T	T	T	T	T	T	C	T	Y	T	T	T	T	T	T	T	T	T	T
AX-86177234	A/C	1A	306787923	+	NA	NA	NA	NA	NA	NA	M	M	A	A	C	C	A	N	C	A	A	N	A	A	A	A	A	A	A	A	A	A	A	A	A	A	C	A	M	A	A	A	A	A	A	A	A	A	A
AX-111129992	T/C	1A	307208760	+	NA	NA	NA	NA	NA	NA	Y	Y	T	T	T	C	T	C	C	T	T	Y	T	T	T	T	T	T	T	T	T	T	T	T	T	T	C	T	Y	T	T	T	T	T	T	T	T	T	T
AX-110169096	A/C	1A	307307297	+	NA	NA	NA	NA	NA	NA	M	M	C	A	A	C	A	C	C	A	A	M	A	A	A	A	A	A	A	A	A	A	A	A	A	A	C	A	M	A	A	A	A	A	A	A	A	A	A
AX-94400371	T/C	1A	307329201	+	NA	NA	NA	NA	NA	NA	Y	Y	T	T	T	C	T	C	C	T	T	Y	T	T	T	T	T	T	T	T	T	T	T	T	T	T	C	T	Y	T	T	T	T	T	T	T	T	T	T
AX-110517610	C/T	1A	308177042	+	NA	NA	NA	NA	NA	NA	T	T	C	C	C	T	C	T	T	C	C	Y	C	C	C	Y	C	C	C	C	C	C	C	C	C	C	T	C	T	C	C	C	C	C	C	C	C	C	C
AX-86178342	C/A	1A	309862874	+	NA	NA	NA	NA	NA	NA	C	C	C	C	C	C	C	A	C	C	C	A	C	C	C	C	M	C	M	C	C	C	C	C	C	C	A	M	M	A	M	C	N	C	C	M	C	C	C
AX-86178346	C/A	1A	309862874	+	NA	NA	NA	NA	NA	NA	C	C	C	C	C	C	C	A	C	C	C	M	C	C	C	C	A	C	A	C	C	C	C	C	C	C	A	A	A	A	A	C	C	C	C	A	C	C	C
AX-94441967	G/C	1A	309863522	+	NA	NA	NA	NA	NA	NA	C	C	C	G	G	C	G	C	C	G	G	C	G	G	N	S	C	G	C	G	G	N	G	N	G	G	C	C	N	C	C	G	G	N	G	C	G	G	G
AX-110029223	G/A	1A	309890519	+	NA	NA	NA	NA	NA	NA	G	G	G	G	G	G	G	A	G	G	G	N	G	G	G	G	A	G	A	G	G	G	G	G	G	G	A	A	A	A	A	G	G	G	G	A	G	G	G
AX-95237226	C/T	1A	310490261	+	NA	NA	NA	NA	NA	NA	C	C	C	C	C	C	C	T	C	C	C	Y	C	C	C	C	T	C	T	C	C	C	C	C	C	C	T	T	T	T	T	C	C	C	C	T	C	C	C
AX-95658453	C/T	1A	310490261	+	NA	NA	NA	NA	NA	NA	C	C	C	C	C	C	C	T	C	C	C	Y	C	C	C	C	T	C	T	C	C	C	C	C	C	C	T	T	T	T	T	C	C	C	C	T	C	C	C
AX-95238138	C/T	1A	310496009	+	NA	NA	NA	NA	NA	NA	C	C	C	C	C	C	C	T	C	C	C	Y	C	C	C	C	T	C	T	C	C	C	Y	C	C	C	T	T	T	T	T	C	C	C	C	T	C	C	C
AX-95684906	C/T	1A	310496009	+	NA	NA	NA	NA	NA	NA	C	C	C	C	C	C	C	T	C	C	C	N	C	C	C	C	T	C	T	C	C	C	C	C	C	C	T	T	T	T	T	C	C	C	C	T	C	C	C
AX-179559749	A/G	1A	310585895	+	NA	NA	NA	NA	NA	NA	G	A	A	R	R	G	A	G	G	A	R	R	R	A	A	R	G	A	G	A	R	A	A	A	A	A	G	G	G	G	G	A	R	A	R	G	R	R	A
AX-95631639	A/G	1A	310585895	+	NA	NA	NA	NA	NA	NA	G	A	A	A	A	G	A	G	G	A	A	G	A	A	A	R	G	A	G	A	A	A	A	A	A	A	G	G	G	G	G	A	A	A	A	G	A	A	A
AX-108880240	A/G	1A	310936359	+	NA	NA	NA	NA	NA	NA	A	A	A	A	A	A	A	G	A	A	A	R	A	A	A	A	G	A	G	A	A	A	A	A	A	A	G	G	G	G	G	A	A	A	A	G	A	A	A
AX-109054331	A/G	1A	310955489	+	NA	NA	NA	NA	NA	NA	G	A	A	A	A	G	A	G	G	A	A	R	A	A	A	R	G	A	G	A	A	A	A	A	A	A	G	G	G	G	G	A	A	A	A	G	A	A	A
AX-111530836	A/C	1A	311379979	+	NA	NA	NA	NA	NA	NA	A	C	A	A	A	A	A	C	A	A	A	N	A	A	A	A	C	A	C	A	A	A	A	A	A	A	C	C	C	C	C	A	A	A	A	C	A	A	A
AX-109839840	C/T	1A	311391299	+	NA	NA	NA	NA	NA	NA	C	C	C	C	C	C	C	T	C	C	C	Y	C	C	C	C	T	C	T	C	C	C	C	C	C	C	T	T	T	T	T	C	C	C	C	T	C	C	C
AX-94997890	C/T	1A	311393988	+	NA	NA	NA	NA	NA	NA	C	C	N	C	C	C	C	Y	C	C	C	C	C	C	C	C	Y	C	Y	C	C	C	C	C	C	C	T	Y	Y	Y	Y	C	C	C	C	Y	C	C	C
AX-111719607	T/C	1A	311405875	+	NA	NA	NA	NA	NA	NA	C	N	T	T	T	C	T	C	C	T	T	Y	T	T	T	Y	C	T	C	T	T	T	N	T	T	T	C	C	C	C	C	T	T	T	T	C	T	T	T
AX-110998966	C/T	1A	311810445	+	NA	NA	NA	NA	NA	NA	T	T	C	C	C	T	C	T	T	C	C	N	C	C	C	Y	T	C	T	C	C	C	C	C	C	C	T	T	T	T	T	C	C	C	C	T	C	C	C
AX-108927863	C/T	1A	311812416	+	NA	NA	NA	NA	NA	NA	C	N	C	C	C	C	C	T	C	C	C	N	C	C	C	C	N	C	N	C	C	C	C	C	C	C	T	T	T	T	Y	C	C	C	C	Y	C	C	C
AX-109302826	T/G	1A	312213129	+	NA	NA	NA	NA	NA	NA	G	T	T	T	K	G	T	G	G	T	T	K	T	T	T	K	G	T	G	T	T	T	T	T	T	T	G	G	G	G	G	T	T	T	T	G	T	T	T
AX-108877470	G/T	1A	312215403	+	NA	NA	NA	NA	NA	NA	G	G	G	G	G	G	G	T	G	G	G	K	G	G	G	G	T	G	T	G	G	G	N	G	G	G	T	T	T	T	T	G	G	G	G	T	G	G	G
AX-110542156	G/A	1A	312579181	+	NA	NA	NA	NA	NA	NA	G	G	G	G	G	G	G	A	G	G	G	R	G	G	G	G	A	G	A	G	G	G	G	G	G	G	A	A	A	A	A	G	G	G	G	A	G	G	G
AX-94895904	C/T	1A	312664008	+	NA	NA	NA	NA	NA	NA	C	C	C	C	C	C	C	C	C	C	C	C	C	C	C	C	T	C	T	C	C	C	C	C	C	C	C	T	N	T	T	C	C	C	C	T	C	C	C
AX-109818943	T/C	1A	312842603	+	NA	NA	NA	NA	NA	NA	T	T	T	T	T	T	T	Y	T	T	T	Y	T	T	T	T	C	T	C	T	T	T	T	T	T	T	C	C	N	Y	C	T	T	T	T	C	T	T	T
AX-110417344	A/G	1A	312845318	+	NA	NA	NA	NA	NA	NA	G	G	A	A	A	G	A	G	G	A	A	R	A	A	A	R	G	A	G	A	A	A	A	A	A	A	G	G	G	G	G	A	A	A	A	G	A	A	A
AX-111775939	A/G	1A	312993687	+	NA	NA	NA	NA	NA	NA	G	A	A	A	A	G	A	G	G	A	A	R	A	A	A	R	G	A	G	A	A	A	A	A	A	A	G	G	G	G	G	A	A	A	A	G	A	A	A
AX-109828158	A/C	1A	313719457	+	NA	NA	NA	NA	NA	NA	A	A	A	A	A	A	A	C	A	A	A	M	A	A	A	A	C	A	C	A	A	A	A	A	A	A	C	C	C	C	C	A	A	A	A	C	A	A	A
AX-109355248	G/A	1A	313722813	+	NA	NA	NA	NA	NA	NA	G	G	G	G	G	G	G	A	G	G	G	A	G	G	G	G	A	G	A	G	G	G	G	G	G	G	A	R	A	A	A	G	G	G	G	A	G	G	G
AX-94446416	G/C	1A	313733935	+	NA	NA	NA	NA	NA	NA	G	G	G	G	G	G	G	C	G	G	G	N	G	G	G	G	C	G	C	G	G	G	G	G	G	G	C	C	C	C	C	G	G	G	G	C	G	G	G
AX-86172356	G/A	1A	313733971	+	NA	NA	NA	NA	NA	NA	G	G	G	G	G	G	G	R	G	G	G	R	G	G	G	G	A	G	A	G	G	G	G	G	G	G	A	A	N	R	A	G	G	G	G	A	G	G	G
AX-86172357	G/A	1A	313733971	+	NA	NA	NA	NA	NA	NA	G	G	G	G	G	G	G	A	G	G	G	R	G	G	G	G	A	G	A	G	G	G	G	G	G	G	A	A	A	A	A	G	G	G	G	A	G	G	G
AX-109533571	A/T	1A	313734827	+	NA	NA	NA	NA	NA	NA	T	A	A	A	A	T	A	T	T	A	A	W	A	A	A	W	T	A	T	A	A	A	A	A	A	A	T	T	T	T	T	A	A	A	A	T	A	A	A
AX-86163495	C/T	1A	314076703	+	NA	NA	NA	NA	NA	NA	C	C	C	C	C	C	C	T	C	C	C	N	C	C	C	N	T	C	T	C	C	C	C	C	C	C	T	T	T	T	T	C	C	C	C	T	C	C	C
AX-86163496	C/T	1A	314076703	+	NA	NA	NA	NA	NA	NA	C	C	C	C	C	C	C	T	C	C	C	T	C	C	C	C	Y	C	Y	C	C	C	C	C	C	C	T	Y	Y	T	Y	C	C	C	C	Y	C	C	C
AX-110558039	G/A	1A	314079619	+	NA	NA	NA	NA	NA	NA	G	G	G	G	G	G	G	A	G	G	G	A	G	G	G	G	A	G	A	G	G	G	G	G	G	G	A	A	A	A	A	G	G	G	G	A	G	G	G
AX-179558348	A/G	1A	315946599	+	NA	NA	NA	NA	NA	NA	G	G	A	A	A	G	A	G	G	A	A	R	A	A	A	R	G	A	G	A	A	A	A	N	A	A	G	G	G	G	G	A	A	A	A	G	A	A	A
AX-95164645	A/G	1A	315946599	+	NA	NA	NA	NA	NA	NA	G	G	A	A	A	G	A	G	G	A	A	N	A	R	R	R	G	A	G	R	A	R	R	R	A	A	G	G	G	G	G	A	A	R	A	G	A	A	R
AX-108943547	G/C	1A	316655069	+	NA	NA	NA	NA	NA	NA	G	G	G	G	G	G	G	C	G	G	G	C	G	G	G	G	C	G	C	G	G	G	G	G	G	G	C	C	C	C	C	G	G	G	G	C	G	G	G
AX-109032218	C/T	1A	316655129	+	NA	NA	NA	NA	NA	NA	C	C	C	C	C	C	C	T	C	C	C	N	C	C	C	C	T	C	T	C	C	C	C	C	C	C	T	T	T	T	T	C	C	C	C	T	C	C	C
AX-109846269	G/A	1A	316673983	+	NA	NA	NA	NA	NA	NA	G	G	G	G	G	G	G	A	G	G	G	R	G	G	G	G	A	G	A	G	G	G	G	G	G	G	A	A	A	A	A	G	G	G	G	A	G	G	G
AX-179476096	T/C	1A	316676436	+	NA	NA	NA	NA	NA	NA	T	T	T	T	T	Y	T	N	T	T	T	N	T	T	T	T	Y	T	Y	T	T	T	Y	T	T	T	C	Y	Y	C	Y	T	T	T	T	Y	T	T	T
AX-95654041	T/C	1A	316676436	+	NA	NA	NA	NA	NA	NA	T	T	T	T	T	T	T	Y	T	T	T	C	T	T	T	T	Y	T	Y	T	T	T	T	T	T	T	C	Y	Y	Y	Y	T	T	T	T	Y	T	T	T
AX-94962498	T/C	1A	316677307	+	NA	NA	NA	NA	NA	NA	T	T	T	T	T	T	T	C	T	T	T	Y	T	T	T	T	C	T	C	T	T	T	T	T	T	T	C	C	C	C	C	T	T	T	T	C	T	T	T
AX-179560175	A/G	1A	317182057	+	NA	NA	NA	NA	NA	NA	A	A	A	A	A	A	A	G	A	A	A	R	A	A	A	A	G	A	G	A	A	A	A	A	A	A	G	G	G	G	G	A	A	A	A	G	A	A	A
AX-95631834	A/G	1A	317182057	+	NA	NA	NA	NA	NA	NA	A	N	A	A	A	A	A	G	A	N	A	R	A	A	A	A	G	A	G	A	A	A	A	A	A	A	G	G	G	G	G	A	A	A	A	G	A	A	A
AX-179475578	C/T	1A	317566850	+	NA	NA	NA	NA	NA	NA	C	C	C	C	C	C	C	T	C	C	C	C	C	C	C	C	Y	C	Y	C	C	C	C	C	C	C	C	Y	C	T	Y	C	C	C	C	Y	C	C	C
AX-94456297	C/T	1A	317566850	+	NA	NA	NA	NA	NA	NA	C	N	C	C	C	C	C	Y	C	C	C	C	C	C	C	C	Y	C	Y	C	N	C	C	C	C	C	C	Y	C	Y	Y	C	C	C	C	Y	C	C	C
AX-108982129	T/C	1A	317569033	+	NA	NA	NA	NA	NA	NA	C	T	T	T	T	C	T	C	C	T	T	N	T	T	T	Y	C	T	C	T	T	T	T	T	T	T	C	C	C	C	C	T	T	T	T	C	T	T	T
AX-179560959	G/A	1A	317824684	+	NA	NA	NA	NA	NA	NA	G	G	G	G	G	G	G	A	G	G	G	N	G	G	G	G	A	G	A	G	G	G	G	G	G	G	A	A	A	A	A	G	G	G	G	A	G	G	G
AX-95632280	G/A	1A	317824684	+	NA	NA	NA	NA	NA	NA	G	G	G	G	G	G	G	R	G	G	G	R	G	G	G	G	A	G	A	G	G	G	G	G	G	G	A	A	N	R	A	G	G	G	G	A	G	G	G
AX-86175462	T/C	1A	317825451	+	NA	NA	NA	NA	NA	NA	T	T	T	T	T	T	T	C	T	T	T	N	T	T	T	T	Y	T	Y	T	T	T	T	T	T	T	C	Y	Y	C	Y	T	T	T	T	Y	T	T	T
AX-108922989	G/A	1A	317826349	+	NA	NA	NA	NA	NA	NA	G	G	G	G	G	G	G	A	G	G	G	A	G	G	G	G	A	G	A	G	G	G	G	G	G	G	A	A	A	A	A	G	G	G	G	A	G	G	G
AX-110029490	A/G	1A	317953652	+	NA	NA	NA	NA	NA	NA	G	A	A	A	A	G	A	G	G	A	A	R	A	A	A	R	A	A	A	A	A	A	A	A	A	A	G	A	G	A	A	A	A	A	A	A	A	A	A
AX-108964531	T/C	1A	318010718	+	NA	NA	NA	NA	NA	NA	C	T	T	T	T	C	T	C	C	T	T	Y	T	T	T	Y	T	T	T	T	T	T	T	T	T	T	C	T	C	T	T	T	T	T	T	T	T	T	T
AX-86178320	C/T	1A	318432600	+	NA	NA	NA	NA	NA	NA	C	C	C	C	C	C	C	Y	C	C	C	N	C	C	C	C	C	C	C	C	C	C	C	C	C	C	T	C	T	C	C	C	C	C	C	C	C	C	C
AX-86169866	G/A	1A	318432748	+	NA	NA	NA	NA	NA	NA	G	G	G	G	G	G	G	A	G	G	G	N	G	G	G	G	G	G	G	G	G	G	G	G	G	G	A	G	R	G	G	G	G	G	G	G	G	G	G
AX-109497351	G/A	1A	318798048	+	NA	NA	NA	NA	NA	NA	A	A	G	G	G	A	G	A	A	G	G	N	G	G	G	R	G	G	G	G	G	G	G	G	G	G	A	G	A	G	G	G	G	G	G	G	G	G	G
AX-111233381	T/C	1A	319039983	+	NA	NA	NA	NA	NA	NA	C	C	T	T	T	Y	T	C	C	T	T	N	T	T	T	N	T	T	T	T	T	T	T	T	T	T	C	T	C	T	T	T	T	T	T	T	T	T	T
AX-111609101	T/C	1A	319574923	+	NA	NA	NA	NA	NA	NA	C	C	T	T	T	C	T	C	C	Y	T	Y	T	T	T	Y	T	Y	T	T	T	T	T	T	T	N	C	T	C	T	T	T	T	T	T	T	T	T	T
AX-109391662	A/G	1A	320145391	+	NA	NA	NA	NA	NA	NA	G	G	A	A	A	G	A	G	G	A	A	A	A	A	A	R	A	A	A	A	A	A	A	A	A	A	A	A	N	A	A	A	A	A	A	A	A	A	A
AX-109928651	G/A	1A	320416440	+	NA	NA	NA	NA	NA	NA	A	N	G	G	G	A	G	A	A	G	G	G	G	G	G	N	G	G	N	G	G	G	G	G	G	G	G	G	R	G	G	G	G	G	G	G	G	G	G
AX-111469113	A/C	1A	320799437	+	NA	NA	NA	NA	NA	NA	C	C	A	A	A	C	A	C	C	A	A	N	A	A	A	M	A	A	A	A	A	A	A	A	A	A	C	A	C	A	A	A	A	A	A	A	A	A	A
AX-110931640	A/C	1A	320877172	+	NA	NA	NA	NA	NA	NA	C	C	A	A	A	C	A	C	C	A	A	M	A	A	A	M	A	A	A	A	A	A	A	A	A	A	C	A	C	A	A	A	A	A	A	A	A	A	A
AX-110368348	T/G	1A	320879679	+	NA	NA	NA	NA	NA	NA	G	G	T	T	T	G	T	G	G	T	T	K	T	T	T	K	T	T	T	T	T	T	T	T	T	T	G	T	G	T	T	T	T	T	T	T	T	T	T
AX-94663988	G/A	1A	320884285	+	NA	NA	NA	NA	NA	NA	R	R	G	G	G	G	A	G	G	A	G	G	G	A	A	R	R	A	R	A	G	A	A	A	A	G	A	R	A	G	R	A	G	A	G	A	G	G	A
AX-110451171	T/C	1A	321062904	+	NA	NA	NA	NA	NA	NA	C	C	T	T	T	C	T	C	C	T	T	Y	T	T	T	N	T	T	T	T	T	T	Y	T	T	T	C	T	C	T	T	T	T	T	T	T	T	T	T
AX-110553948	A/G	1A	321192510	+	NA	NA	NA	NA	NA	NA	G	G	A	A	A	G	A	G	G	A	A	R	A	A	A	R	A	A	A	A	A	A	A	A	A	A	G	A	G	A	A	A	A	A	A	A	A	A	A
AX-111032943	A/C	1A	321476081	+	NA	NA	NA	NA	NA	NA	C	C	A	A	A	C	A	C	C	A	A	M	A	A	A	N	A	A	A	A	A	A	M	A	A	A	C	A	C	A	A	A	A	A	A	A	A	A	A
AX-111696528	A/G	1A	321877601	+	NA	NA	NA	NA	NA	NA	G	G	A	A	A	G	A	G	G	A	A	G	A	A	A	R	A	A	A	A	A	A	R	A	A	A	G	A	G	A	A	A	A	A	A	A	A	A	A
AX-111498882	C/T	1A	321878894	+	NA	NA	NA	NA	NA	NA	T	T	C	C	C	T	C	T	T	C	C	Y	C	C	C	Y	C	C	C	C	C	C	C	C	C	C	C	C	C	C	C	C	C	C	C	C	C	C	C
AX-94760203	A/C	1A	322022753	+	NA	NA	NA	NA	NA	NA	C	C	A	A	A	C	A	C	C	M	A	N	A	A	A	M	A	A	A	A	A	A	A	A	A	A	C	A	C	A	A	A	A	A	A	A	A	A	A
AX-110633470	G/A	1A	322024868	+	NA	NA	NA	NA	NA	NA	A	A	G	G	G	A	G	A	A	G	G	R	G	G	G	R	G	G	G	G	G	G	G	G	G	G	G	G	G	G	G	G	G	G	G	G	G	G	G
AX-110588403	C/G	1A	322025543	+	NA	NA	NA	NA	NA	NA	G	G	C	C	C	G	C	G	G	C	C	N	C	C	C	S	C	C	C	C	C	C	S	C	C	C	G	C	G	C	C	C	C	C	C	C	C	C	C
AX-110434112	G/C	1A	322145135	+	NA	NA	NA	NA	NA	NA	C	C	G	G	G	C	G	C	C	G	G	N	G	G	G	S	G	G	G	G	G	G	G	G	G	G	C	G	C	G	G	G	G	G	G	G	G	G	G
AX-95685239	A/G	1A	322184576	+	NA	NA	NA	NA	NA	NA	G	G	A	A	A	G	A	G	G	A	A	R	A	A	A	R	A	A	A	A	A	A	A	A	A	A	A	A	A	A	A	A	A	A	A	A	A	A	A
AX-111197066	T/C	1A	322186166	+	NA	NA	NA	NA	NA	NA	C	C	T	T	T	C	T	C	C	T	T	Y	T	T	T	N	T	T	T	T	T	T	T	T	T	T	C	T	C	T	T	T	T	T	T	T	T	T	T
AX-110946924	G/A	1A	322311214	+	NA	NA	NA	NA	NA	NA	A	A	G	G	G	A	G	A	A	G	G	N	G	G	G	R	G	G	G	G	G	G	G	G	G	G	G	G	G	G	G	G	G	G	G	G	G	G	G
AX-110367827	T/C	1A	322315188	+	NA	NA	NA	NA	NA	NA	C	N	T	T	T	C	T	C	C	T	T	C	T	T	T	Y	T	T	T	T	T	T	T	T	T	T	T	T	T	T	T	T	T	T	T	T	T	T	T
AX-109330283	C/T	1A	322317731	+	NA	NA	NA	NA	NA	NA	T	T	C	C	C	T	C	T	T	C	C	Y	C	C	C	N	C	C	C	C	C	C	C	C	C	C	T	C	T	C	C	C	C	C	C	C	C	C	C
AX-109347635	T/C	1A	322439478	+	NA	NA	NA	NA	NA	NA	C	C	T	T	T	C	T	C	C	T	T	Y	T	T	T	Y	T	T	T	T	T	T	N	T	T	T	T	T	T	T	T	T	T	T	T	T	T	T	T
AX-111809296	C/T	1A	322505006	+	NA	NA	NA	NA	NA	NA	T	T	C	C	C	T	C	T	T	C	C	N	C	C	C	Y	C	C	C	C	C	C	C	C	C	C	C	C	C	C	C	C	C	C	C	C	C	C	C
AX-111620737	C/T	1A	322617141	+	NA	NA	NA	NA	NA	NA	T	T	C	C	C	T	C	T	T	C	C	Y	C	C	C	Y	C	C	C	C	C	C	C	C	C	C	C	C	C	C	C	C	C	C	C	C	C	C	C
AX-111102675	T/C	1A	322750252	+	NA	NA	NA	NA	NA	NA	C	C	T	T	T	C	T	C	C	T	T	C	T	T	T	Y	T	T	T	T	T	T	T	T	T	T	T	T	T	T	T	T	T	T	T	T	T	T	T
AX-94665409	A/G	1A	322760068	+	NA	NA	NA	NA	NA	NA	G	G	A	A	A	G	A	G	G	A	A	N	A	A	A	N	A	A	A	A	A	A	A	A	A	A	G	A	G	A	A	A	A	A	A	A	A	A	A
AX-111046060	A/G	1A	322928237	+	NA	NA	NA	NA	NA	NA	G	G	A	A	A	G	A	G	G	A	A	R	A	A	A	N	A	A	A	A	A	A	A	A	A	A	A	A	A	A	A	A	A	A	A	A	A	A	A
AX-110448044	G/A	1A	322929827	+	NA	NA	NA	NA	NA	NA	A	A	G	G	G	A	G	R	A	G	G	R	G	G	G	R	G	G	G	G	G	G	G	G	G	G	G	G	G	G	G	G	G	G	G	G	G	G	G
AX-111003139	A/G	1A	323468836	+	NA	NA	NA	NA	NA	NA	G	G	A	A	A	G	A	G	G	A	A	R	A	A	A	R	A	A	A	A	A	A	A	A	A	A	G	A	G	A	A	A	A	A	A	A	A	A	A
AX-109293228	A/G	1A	323507005	+	NA	NA	NA	NA	NA	NA	G	G	A	A	A	G	A	G	G	A	A	R	A	A	A	R	A	A	A	A	A	A	A	A	A	A	A	A	A	A	A	A	A	A	A	A	A	A	A
AX-110917019	T/C	1A	323540492	+	NA	NA	NA	NA	NA	NA	C	C	T	T	T	C	T	C	C	T	T	Y	T	T	T	Y	T	T	T	T	T	T	T	T	T	T	N	T	C	T	T	T	T	T	T	T	T	T	T
AX-109827985	C/T	1A	323542787	+	NA	NA	NA	NA	NA	NA	T	T	C	C	C	T	C	T	T	C	C	Y	C	C	C	Y	C	C	C	C	C	C	C	C	C	C	T	C	Y	C	C	C	C	C	C	C	C	C	C
AX-111510129	G/A	1A	323544187	+	NA	NA	NA	NA	NA	NA	A	A	G	R	G	A	G	A	A	G	R	N	R	R	R	R	R	G	G	G	G	G	G	G	G	G	G	G	G	G	G	R	G	G	G	R	R	R	G
AX-111718651	T/C	1A	323657145	+	NA	NA	NA	NA	NA	NA	C	C	T	T	T	C	T	C	C	T	T	Y	T	N	T	Y	T	T	T	T	T	T	Y	T	T	T	C	T	C	T	T	T	T	T	T	T	T	T	T
AX-109950718	G/A	1A	323661167	+	NA	NA	NA	NA	NA	NA	A	A	G	G	G	A	G	A	A	G	G	R	G	G	G	R	G	G	G	G	G	G	G	G	G	G	G	G	G	G	G	G	G	G	G	G	G	G	G
AX-110019142	A/G	1A	323873763	+	NA	NA	NA	NA	NA	NA	G	G	A	A	A	G	A	G	G	A	A	R	A	A	A	R	A	A	A	A	A	A	A	A	A	A	A	A	A	A	A	A	A	A	A	A	A	A	A
AX-111212536	G/C	1A	323878566	+	NA	NA	NA	NA	NA	NA	S	S	G	G	G	C	G	C	C	G	G	S	G	G	G	S	G	G	G	G	G	G	G	G	G	G	G	G	G	G	G	G	G	G	G	G	G	G	G
AX-110425459	C/T	1A	323879388	+	NA	NA	NA	NA	NA	NA	T	T	C	C	C	T	C	T	T	C	C	T	C	C	C	Y	C	C	C	C	C	C	C	C	C	C	C	C	C	C	C	C	C	C	C	C	C	C	C
AX-109042845	T/C	1A	323915355	+	NA	NA	NA	NA	NA	NA	C	C	T	T	T	C	T	C	C	T	T	C	T	T	T	Y	T	T	T	T	T	T	T	T	T	T	T	T	T	T	T	T	T	T	T	T	T	T	T
AX-110653719	T/C	1A	324677573	+	NA	NA	NA	NA	NA	NA	C	C	T	T	T	C	T	C	C	T	T	Y	T	T	T	Y	T	T	T	T	T	T	T	T	T	T	T	T	N	T	T	T	T	T	T	T	T	T	T
AX-110977845	C/A	1A	325007950	+	NA	NA	NA	NA	NA	NA	A	A	C	C	C	A	C	A	A	C	C	M	C	C	C	M	C	C	C	C	C	C	C	C	C	C	C	C	C	C	C	C	C	C	C	C	C	C	C
AX-111034164	G/T	1A	325721473	+	NA	NA	NA	NA	NA	NA	T	T	G	G	G	T	G	T	T	G	G	K	G	G	G	K	G	G	G	G	G	G	G	G	G	G	G	G	G	G	G	G	G	G	G	G	G	G	G
AX-109852427	A/C	1A	326281493	+	NA	NA	NA	NA	NA	NA	C	C	A	A	A	C	A	C	C	A	A	M	A	A	A	M	A	A	A	A	A	A	N	A	A	A	C	A	C	A	A	A	A	A	A	A	A	A	A
AX-110471563	C/G	1A	326776267	+	NA	NA	NA	NA	NA	NA	G	G	C	C	C	G	C	G	G	C	C	S	C	C	C	S	C	C	C	C	C	C	C	C	C	C	C	C	C	C	C	C	C	C	C	C	C	C	C
AX-108756540	C/T	1A	328171372	+	NA	NA	NA	NA	NA	NA	T	T	C	C	C	T	C	T	T	C	C	Y	C	C	C	Y	C	C	C	C	C	C	C	C	C	C	C	C	C	C	C	C	C	C	C	C	C	C	C
AX-110376370	G/A	1A	328171600	+	NA	NA	NA	NA	NA	NA	A	A	G	G	G	A	G	A	A	G	G	R	G	G	G	R	G	G	G	G	G	G	G	G	G	G	G	G	G	G	G	G	G	G	G	G	G	G	G
AX-111591474	A/C	1A	328175170	+	NA	NA	NA	NA	NA	NA	C	C	A	A	A	C	A	C	C	A	A	M	A	A	A	M	A	A	A	A	A	A	N	A	A	A	C	A	C	A	A	A	A	A	A	A	A	A	A
AX-111700826	T/C	1A	328439144	+	NA	NA	NA	NA	NA	NA	C	C	C	T	C	C	T	C	C	T	T	C	T	T	T	T	C	T	C	T	T	T	T	T	T	T	T	C	T	C	C	C	T	T	T	C	T	T	T
AX-110078647	G/A	1A	328797575	+	NA	NA	NA	NA	NA	NA	A	A	G	G	G	A	G	A	A	G	G	R	G	G	G	R	G	G	G	G	G	G	G	G	G	G	G	G	G	G	G	G	G	G	G	G	G	G	G
AX-110621464	A/G	1A	329114318	+	NA	NA	NA	NA	NA	NA	G	G	A	A	A	G	A	G	G	A	A	R	A	A	A	R	A	A	A	A	A	A	A	A	A	A	A	A	A	A	A	A	A	A	A	A	A	A	A
AX-86173425	G/A	1A	329115869	+	NA	NA	NA	NA	NA	NA	G	G	A	G	A	G	G	G	G	G	G	G	G	G	G	G	A	G	A	G	G	G	G	G	G	G	G	A	G	A	A	A	G	G	G	A	G	G	G
AX-94907052	G/C	1A	329116187	+	NA	NA	NA	NA	NA	NA	S	S	C	G	C	C	G	C	C	G	G	C	G	G	G	G	S	G	S	G	G	G	G	G	G	G	G	S	G	C	S	C	G	G	G	S	G	G	G
AX-94397743	C/T	1A	329234995	+	NA	NA	NA	NA	NA	NA	T	T	T	C	T	T	C	C	T	C	C	C	C	C	C	Y	C	C	C	C	C	C	C	C	C	C	C	C	C	C	C	T	C	C	C	C	C	C	C
AX-110971510	G/C	1A	342294042	+	NA	NA	NA	NA	NA	NA	G	C	C	G	C	G	G	G	G	G	G	G	G	G	G	G	G	G	G	G	G	G	G	G	G	G	G	G	G	G	G	C	G	G	G	G	G	G	G
AX-94592848	G/C	1A	342424187	+	NA	NA	NA	NA	NA	NA	G	N	C	G	C	G	G	G	G	G	G	N	G	G	G	G	G	G	G	G	G	G	G	G	G	G	G	G	G	G	G	C	G	G	G	G	G	G	G
AX-110469900	G/T	1A	342425672	+	NA	NA	NA	NA	NA	NA	G	T	T	G	T	G	G	G	G	G	G	G	G	G	G	G	G	G	G	G	G	G	G	G	G	G	G	G	G	G	G	T	G	G	G	G	G	G	G
AX-95082367	T/C	1A	342564425	+	NA	NA	NA	NA	NA	NA	T	T	T	T	T	T	T	T	T	T	T	C	T	T	T	T	T	T	T	T	T	T	T	T	T	T	C	T	C	T	T	C	T	T	T	T	T	T	T
AX-95685067	T/C	1A	342564425	+	NA	NA	NA	NA	NA	NA	T	T	T	T	T	T	T	T	T	T	T	C	T	T	T	T	T	T	T	T	T	T	T	T	T	T	C	T	C	T	T	C	T	T	T	T	T	T	T
AX-109384322	C/T	1A	342662172	+	NA	NA	NA	NA	NA	NA	C	T	T	C	T	C	C	C	C	C	C	C	C	C	C	C	C	C	C	C	C	C	C	C	C	C	C	C	C	C	C	T	C	C	C	C	C	C	C
AX-110623625	C/T	1A	342662850	+	NA	NA	NA	NA	NA	NA	C	T	T	C	T	C	C	C	C	C	C	C	C	C	C	C	C	C	C	C	C	C	C	C	C	C	C	C	C	C	C	T	C	C	C	C	C	C	C
AX-108965988	C/T	1A	342681820	+	NA	NA	NA	NA	NA	NA	C	T	T	C	T	C	C	C	C	C	C	C	C	C	C	C	C	C	C	C	C	C	C	C	C	C	C	C	C	C	C	T	C	C	C	C	C	C	C
AX-110427237	G/A	1A	345604214	+	NA	NA	NA	NA	NA	NA	G	G	A	G	A	G	G	A	G	G	G	G	G	G	G	G	G	G	G	G	G	G	G	G	G	G	G	G	G	G	G	A	G	G	G	G	G	G	G
AX-109310093	A/G	1A	345762647	+	NA	NA	NA	NA	NA	NA	A	A	G	A	G	A	A	G	A	A	A	A	A	A	A	A	A	A	A	A	A	A	A	A	A	A	A	A	A	A	A	G	A	A	A	A	A	A	A
AX-109921819	A/G	1A	345763387	+	NA	NA	NA	NA	NA	NA	A	A	G	A	G	A	A	G	A	A	A	A	A	A	A	A	A	A	A	A	A	A	A	A	A	A	A	A	A	A	A	G	A	A	A	A	A	A	A
AX-109420704	C/T	1A	345763781	+	NA	NA	NA	NA	NA	NA	C	C	T	C	T	C	C	C	C	C	C	C	C	C	C	C	C	C	C	C	C	C	C	C	C	C	C	C	C	C	C	T	C	C	C	C	C	C	C
AX-108744074	C/G	1A	345889385	+	NA	NA	NA	NA	NA	NA	C	C	G	C	G	C	C	G	C	C	C	N	C	C	C	C	C	C	C	C	C	C	C	C	C	C	C	C	C	C	C	G	C	C	C	C	C	C	C
AX-86183964	G/A	1A	345891067	+	NA	NA	NA	NA	NA	NA	G	G	G	G	G	G	G	G	G	G	G	G	G	G	G	G	R	G	R	G	G	G	G	G	G	G	G	R	G	A	R	G	G	G	G	R	G	G	G
AX-111141894	A/G	1A	346188321	+	NA	NA	NA	NA	NA	NA	A	A	G	A	G	A	A	A	A	A	A	N	A	A	A	A	A	A	A	A	A	A	A	A	A	A	A	A	A	A	A	G	A	A	A	A	A	A	A
AX-111451975	T/C	1A	346229806	+	NA	NA	NA	NA	NA	NA	T	T	C	T	C	T	T	C	T	T	T	T	T	T	T	T	T	T	T	T	T	T	T	T	T	T	T	T	T	T	T	C	T	T	T	T	T	T	T
AX-110007315	G/T	1A	346327255	+	NA	NA	NA	NA	NA	NA	G	G	T	G	T	G	G	T	G	G	G	G	G	G	G	G	G	G	G	G	G	G	G	G	G	G	G	G	G	G	G	T	G	G	G	G	G	G	G
AX-109858278	G/A	1A	346327476	+	NA	NA	NA	NA	NA	NA	G	G	A	G	A	G	G	G	G	G	G	G	G	G	G	G	G	G	G	G	G	G	G	G	G	G	G	G	G	G	G	A	G	G	G	G	G	G	G
AX-111038062	G/A	1A	346500596	+	NA	NA	NA	NA	NA	NA	G	G	A	G	A	G	G	G	G	G	G	G	G	G	G	G	G	G	G	G	G	G	G	G	G	G	G	G	G	G	G	A	G	G	G	G	G	G	G
AX-109977330	G/A	1A	346554347	+	NA	NA	NA	NA	NA	NA	G	G	G	G	A	G	G	A	G	G	G	G	G	G	G	G	G	G	G	G	G	G	G	G	G	G	G	G	G	G	G	A	G	G	G	G	G	G	G
AX-109878853	T/C	1A	346706111	+	NA	NA	NA	NA	NA	NA	T	T	C	T	C	T	T	C	T	T	T	T	T	T	T	T	T	T	T	T	T	T	T	T	T	T	T	T	T	T	T	C	T	T	T	T	T	T	T
AX-110099198	A/G	1A	346755210	+	NA	NA	NA	NA	NA	NA	A	A	G	A	G	A	A	G	A	A	A	A	A	A	A	A	A	A	A	A	A	A	A	A	A	A	A	A	A	A	A	G	A	A	A	A	A	A	A
AX-109005940	A/G	1A	346793698	+	NA	NA	NA	NA	NA	NA	A	A	G	A	G	A	A	G	A	A	A	A	A	A	A	A	A	A	A	A	A	A	A	A	A	A	A	A	A	A	A	G	A	A	A	A	A	A	A
AX-109628778	G/A	1A	347414986	+	NA	NA	NA	NA	NA	NA	A	A	G	G	A	A	G	G	A	G	G	G	G	G	G	N	G	G	G	G	G	G	G	G	G	G	G	G	G	G	G	A	G	G	G	G	G	G	G
AX-109925778	A/G	1A	347661158	+	NA	NA	NA	NA	NA	NA	G	G	G	A	G	G	A	A	G	A	A	G	A	A	A	R	A	A	A	A	A	A	A	A	A	A	G	A	G	A	A	G	A	A	A	A	A	A	A
AX-108852569	T/C	1A	347913315	+	NA	NA	NA	NA	NA	NA	T	T	C	T	C	T	T	T	T	T	T	N	T	T	T	T	T	T	T	T	T	T	T	T	T	T	C	T	C	T	T	C	T	T	T	T	T	T	T
AX-108943339	C/T	1A	348321297	+	NA	NA	NA	NA	NA	NA	C	C	C	C	C	C	C	C	C	C	C	Y	C	C	C	C	C	C	C	C	C	C	C	C	C	C	T	C	T	C	C	C	C	C	C	C	C	C	C
AX-110506787	T/G	1A	348624357	+	NA	NA	NA	NA	NA	NA	T	N	T	T	G	T	T	T	T	T	T	G	T	T	T	T	T	T	T	T	T	T	T	T	T	T	G	T	G	T	T	G	T	T	T	T	T	T	T
AX-108905801	A/G	1A	349060617	+	NA	NA	NA	NA	NA	NA	G	G	A	A	G	G	A	A	G	A	A	G	A	A	A	R	A	A	A	A	A	A	A	A	A	A	G	A	G	A	A	G	A	A	A	A	A	A	A
AX-108858579	G/A	1A	349567760	+	NA	NA	NA	NA	NA	NA	G	G	G	G	G	G	G	G	G	G	G	R	G	G	G	G	G	G	G	G	G	G	G	G	G	G	A	G	A	G	G	G	G	G	G	G	G	G	G
AX-94546321	T/C	1A	350861321	+	NA	NA	NA	NA	NA	NA	Y	Y	C	T	C	C	T	T	C	T	T	N	T	T	T	N	T	T	T	T	T	T	T	T	T	T	C	T	Y	T	T	T	T	T	T	T	T	T	T
AX-179558240	T/G	1A	351771675	+	NA	NA	NA	NA	NA	NA	T	T	T	T	T	T	T	T	T	T	T	K	T	T	T	T	T	T	T	T	T	T	T	T	T	T	G	T	K	T	T	T	T	T	T	T	T	T	T
AX-94719212	A/C	1A	352304979	+	NA	NA	NA	NA	NA	NA	C	C	C	A	C	C	A	A	C	A	A	M	A	A	A	M	A	A	A	A	A	A	A	A	A	A	C	A	C	A	A	C	A	A	A	A	A	A	A
AX-111589787	A/G	1A	352373078	+	NA	NA	NA	NA	NA	NA	G	N	G	A	G	G	A	A	G	A	A	G	A	A	A	R	A	A	A	A	A	A	R	A	A	A	G	A	G	A	A	G	A	A	A	A	A	A	A
AX-110570363	T/C	1A	352554960	+	NA	NA	NA	NA	NA	NA	T	T	C	T	T	T	T	T	T	T	T	C	T	T	T	T	T	T	T	T	T	T	T	T	T	T	C	T	C	T	T	C	T	T	T	T	T	T	T
AX-111531240	T/G	1A	353345309	+	NA	NA	NA	NA	NA	NA	T	T	T	T	T	T	T	T	T	T	T	G	T	T	T	T	T	T	T	T	T	T	T	T	T	T	G	T	G	T	T	G	T	T	T	T	T	T	T
AX-110928462	T/C	1A	353374640	+	NA	NA	NA	NA	NA	NA	T	T	T	T	T	T	T	T	T	T	T	Y	T	T	T	T	T	T	T	T	T	T	T	T	T	T	C	T	Y	T	T	T	T	T	T	T	T	T	T
AX-108881072	A/G	1A	353850439	+	NA	NA	NA	NA	NA	NA	A	A	A	A	A	A	A	A	A	A	A	G	A	A	A	A	A	A	A	A	A	A	A	A	A	A	G	A	G	A	A	A	A	A	A	A	A	A	A
AX-109996362	G/A	1A	354010614	+	NA	NA	NA	NA	NA	NA	G	G	G	G	G	G	G	G	G	G	G	A	G	G	G	G	G	G	G	G	G	G	G	G	G	G	A	G	N	G	G	N	G	G	G	G	G	G	G
AX-95653214	G/A	1A	354010614	+	NA	NA	NA	NA	NA	NA	G	G	G	G	G	G	G	G	G	G	G	A	G	G	G	G	G	G	G	G	G	G	G	G	G	G	A	G	R	G	G	A	G	G	G	G	G	G	G
AX-179557719	T/G	1A	354208939	+	NA	NA	NA	NA	NA	NA	T	T	T	T	T	G	G	T	G	G	T	G	T	T	T	T	T	G	T	T	T	T	T	T	G	G	G	T	T	T	T	G	T	T	T	T	T	T	T
AX-94912730	C/T	1A	354209589	+	NA	NA	NA	NA	NA	NA	C	C	C	C	C	C	C	C	C	C	C	T	C	C	C	C	C	C	C	C	C	C	C	C	C	C	T	C	T	C	C	C	C	C	C	C	C	C	C
AX-109968145	T/C	1A	354712934	+	NA	NA	NA	NA	NA	NA	T	T	T	T	T	T	T	T	T	T	T	C	T	T	T	T	T	T	T	T	T	T	T	T	T	T	C	T	C	T	T	T	T	T	T	T	T	T	T
AX-109876087	G/A	1A	355402771	+	NA	NA	NA	NA	NA	NA	G	G	G	G	G	G	G	G	G	G	G	A	G	G	G	G	G	G	G	G	G	G	G	G	G	G	A	G	R	G	G	A	G	G	G	G	G	G	G
AX-89475672	A/G	1A	356579991	+	NA	NA	NA	NA	NA	NA	A	A	A	A	A	A	A	A	A	A	A	R	A	A	A	A	A	A	A	A	A	A	N	A	A	A	G	A	G	A	A	A	A	A	A	A	A	A	A
AX-112290744	A/G	1A	356580993	+	NA	NA	NA	NA	NA	NA	N	N	A	A	A	A	G	A	A	G	A	A	A	N	N	A	N	G	N	N	A	N	N	N	G	A	G	A	N	A	N	G	A	N	A	N	A	A	N
AX-179558305	G/A	1A	356580993	+	NA	NA	NA	NA	NA	NA	R	R	G	G	A	A	G	A	A	G	G	A	G	G	G	R	R	G	R	G	G	G	R	G	G	A	G	R	R	A	R	G	G	G	G	G	G	G	G
AX-108748978	C/T	1A	356864866	+	NA	NA	NA	NA	NA	NA	T	C	C	C	C	T	C	C	N	C	C	T	C	C	C	C	C	C	C	C	C	C	C	C	C	C	T	C	T	C	C	T	C	C	C	C	C	C	C
AX-179558675	C/T	1A	356864866	+	NA	NA	NA	NA	NA	NA	T	C	C	C	C	T	C	C	T	C	C	T	C	C	C	C	C	C	C	C	C	C	C	C	C	C	T	N	T	C	C	T	C	C	C	C	C	C	C
AX-109832482	A/C	1A	357634616	+	NA	NA	NA	NA	NA	NA	A	A	C	A	A	A	A	A	A	A	A	C	A	A	A	A	A	A	A	A	A	A	A	A	A	A	C	A	C	A	A	C	A	A	A	A	A	A	A
AX-108921683	T/C	1A	358309563	+	NA	NA	NA	NA	NA	NA	T	T	C	T	T	T	T	T	T	T	T	C	T	T	T	T	T	T	T	T	T	T	T	T	T	T	C	T	C	T	T	C	T	T	T	T	T	T	T
AX-111258903	A/G	1A	358346157	+	NA	NA	NA	NA	NA	NA	A	A	G	A	A	A	A	A	A	A	A	R	A	A	A	A	A	A	A	A	A	A	A	A	A	A	G	A	R	A	A	A	A	A	A	A	A	A	A
AX-110990436	A/C	1A	358474819	+	NA	NA	NA	NA	NA	NA	A	A	C	A	A	A	A	A	A	A	A	C	A	A	A	A	A	A	A	A	A	A	M	A	A	A	C	A	C	A	A	C	A	A	A	A	A	A	A
AX-94399186	C/T	1A	359348943	+	NA	NA	NA	NA	NA	NA	C	C	T	C	C	C	C	C	C	C	C	T	C	C	C	C	C	C	C	C	C	C	C	C	C	C	T	C	T	C	C	T	C	C	C	C	C	C	C
AX-95222173	C/A	1A	359353065	+	NA	NA	NA	NA	NA	NA	M	M	A	C	N	C	C	M	C	C	N	C	C	C	C	N	M	C	M	C	N	C	M	C	C	C	C	M	M	M	M	C	N	C	C	C	C	C	C
AX-94974219	C/T	1A	359356599	+	NA	NA	NA	NA	NA	NA	C	C	N	C	C	C	C	C	C	C	C	Y	C	C	C	C	C	C	C	C	C	C	Y	C	C	C	Y	C	T	C	C	C	C	C	C	C	C	C	C
AX-111535298	T/C	1A	359368021	+	NA	NA	NA	NA	NA	NA	T	T	C	T	T	T	T	T	T	T	T	Y	T	T	T	T	T	T	T	T	T	T	T	T	T	T	C	T	Y	T	T	T	T	T	T	T	T	T	T
AX-109877989	A/G	1A	359368063	+	NA	NA	NA	NA	NA	NA	A	A	G	A	A	A	A	A	A	A	A	R	A	A	A	A	A	A	A	A	A	A	A	A	A	A	G	A	R	A	A	A	A	A	A	A	A	A	A
AX-110632688	T/G	1A	360296884	+	NA	NA	NA	NA	NA	NA	T	T	G	T	T	T	T	T	T	T	T	G	T	T	T	T	T	T	T	T	T	T	T	T	T	T	G	T	G	T	T	G	T	T	T	T	T	T	T
AX-108764693	A/C	1A	360455734	+	NA	NA	NA	NA	NA	NA	A	A	C	A	A	A	A	A	A	A	A	C	A	A	A	A	A	A	A	A	A	A	A	A	A	A	C	A	C	A	A	C	A	A	A	A	A	A	A
AX-94500893	A/G	1A	360555182	+	NA	NA	NA	NA	NA	NA	A	A	G	A	A	A	A	A	A	N	A	G	A	A	A	N	A	A	N	A	A	A	A	A	A	A	G	A	R	A	A	G	A	A	A	N	A	A	A
AX-111560538	A/C	1A	360817813	+	NA	NA	NA	NA	NA	NA	A	A	C	A	A	A	A	A	A	A	A	C	A	A	A	A	A	A	A	A	A	A	A	A	A	A	C	A	C	A	A	C	A	A	A	A	A	A	A
AX-111170598	C/T	1A	360818341	+	NA	NA	NA	NA	NA	NA	C	C	C	C	C	C	C	C	C	C	C	T	C	C	C	C	C	C	C	C	C	C	C	C	C	C	T	C	T	C	C	T	C	C	C	C	C	C	C
AX-94519347	A/T	1A	360836834	+	NA	NA	NA	NA	NA	NA	W	W	T	A	T	T	A	A	T	A	A	T	A	A	A	N	A	A	A	A	A	A	A	A	A	A	T	A	W	A	A	T	A	A	A	A	A	A	A
AX-94480304	A/C	1A	360838896	+	NA	NA	NA	NA	NA	NA	C	C	C	A	C	C	A	A	C	A	A	A	A	A	A	M	A	A	A	A	A	A	A	A	A	A	A	A	A	A	A	C	A	A	A	A	A	A	A
AX-86171675	G/A	1A	361102855	+	NA	NA	NA	NA	NA	NA	A	N	A	G	A	A	G	A	A	G	G	N	G	G	G	R	G	G	G	G	G	G	N	G	G	G	G	G	G	G	G	A	G	G	G	G	G	G	G
AX-86171851	G/A	1A	361102855	+	NA	NA	NA	NA	NA	NA	A	A	A	G	A	A	G	A	A	G	G	G	G	G	G	R	G	G	G	G	G	G	G	G	G	G	G	G	G	G	G	A	G	G	G	G	G	G	G
AX-109939645	G/A	1A	361107587	+	NA	NA	NA	NA	NA	NA	A	A	A	G	A	A	G	A	A	G	G	G	G	G	G	R	G	G	G	G	G	G	G	G	G	G	G	G	G	G	G	A	G	G	G	G	G	G	G
AX-111055136	T/C	1A	362276389	+	NA	NA	NA	NA	NA	NA	C	C	C	T	C	C	T	C	C	T	T	N	T	T	T	Y	T	T	T	T	T	T	T	T	T	T	T	T	T	T	T	C	T	T	T	T	T	T	T
AX-86169947	T/C	1A	362282626	+	NA	NA	NA	NA	NA	NA	C	C	C	T	C	C	T	C	C	T	T	T	T	T	T	N	T	T	T	T	T	T	T	T	T	T	T	T	T	T	T	C	T	T	T	T	T	T	T
AX-94525103	A/T	1A	362282720	+	NA	NA	NA	NA	NA	NA	W	W	N	A	T	T	A	T	T	A	A	A	A	A	A	A	A	A	A	A	A	A	A	A	A	A	A	A	A	A	A	T	A	A	A	A	A	A	A
AX-179561252	G/A	1A	362635913	+	NA	NA	NA	NA	NA	NA	G	G	G	G	G	G	A	G	G	A	G	A	G	R	R	G	R	A	R	R	G	R	R	R	A	A	A	R	A	G	R	G	G	R	G	R	G	G	R
AX-95629033	A/G	1A	362635913	+	NA	NA	NA	NA	NA	NA	G	G	G	A	G	G	A	G	G	A	A	N	A	A	A	N	A	A	A	A	A	A	A	A	A	A	A	A	A	A	A	G	A	A	A	A	A	A	A
AX-86172926	G/T	1A	362638551	+	NA	NA	NA	NA	NA	NA	G	T	T	G	G	G	G	K	G	G	G	G	G	G	G	G	G	G	G	G	G	G	G	G	G	G	G	G	G	G	G	T	G	G	G	G	G	G	G
AX-109285836	T/C	1A	362936576	+	NA	NA	NA	NA	NA	NA	C	C	C	T	C	C	T	T	C	T	T	T	T	T	T	N	T	T	T	T	T	T	T	T	T	T	T	T	T	T	T	C	T	T	T	T	T	T	T
AX-108970235	A/G	1A	362938327	+	NA	NA	NA	NA	NA	NA	G	G	G	A	G	G	A	A	G	A	A	A	A	A	A	R	A	A	A	A	A	A	A	A	A	A	A	A	A	A	A	G	A	A	A	A	A	A	A
AX-111546934	A/G	1A	363035340	+	NA	NA	NA	NA	NA	NA	G	G	G	A	G	G	A	A	G	A	A	A	A	A	A	N	A	A	A	A	A	A	A	A	A	A	A	A	A	A	A	G	A	A	A	A	A	A	A
AX-179475612	A/G	1A	363812635	+	NA	NA	NA	NA	NA	NA	G	G	G	A	G	G	A	A	G	A	A	A	A	A	A	R	A	A	A	A	A	A	A	A	A	A	A	A	A	A	A	G	A	A	A	A	A	A	A
AX-94404141	A/G	1A	363812635	+	NA	NA	NA	NA	NA	NA	R	R	G	A	G	G	A	A	G	A	A	N	A	A	A	R	A	A	A	A	A	A	A	A	A	A	A	A	A	A	A	G	A	A	A	A	A	A	A
AX-95135765	T/C	1A	363812746	+	NA	NA	NA	NA	NA	NA	Y	T	C	T	C	C	T	T	C	T	T	N	T	T	T	T	T	T	T	T	T	T	T	T	T	T	T	T	T	T	T	C	T	T	T	T	T	T	T
AX-95659410	C/T	1A	363932010	+	NA	NA	NA	NA	NA	NA	Y	Y	T	C	T	T	C	C	T	C	C	C	C	C	C	C	C	C	C	C	C	C	C	C	C	C	C	C	C	C	C	T	C	C	C	C	C	C	C
AX-109838823	G/A	1A	363941902	+	NA	NA	NA	NA	NA	NA	A	A	A	G	A	A	G	G	A	G	G	G	G	G	G	R	G	G	G	G	G	G	G	G	G	G	G	G	G	G	G	A	G	G	G	G	G	G	G
AX-109966891	A/G	1A	363953104	+	NA	NA	NA	NA	NA	NA	G	G	A	A	G	G	A	A	G	A	A	A	A	A	A	R	A	A	A	A	A	A	A	A	A	A	A	A	A	A	A	G	A	A	A	A	A	A	A
AX-109847276	G/A	1A	363957999	+	NA	NA	NA	NA	NA	NA	A	A	G	G	A	A	G	G	A	G	G	G	G	G	G	R	G	G	G	G	G	G	G	G	G	G	G	G	G	G	G	A	G	G	G	G	G	G	G
AX-108998585	T/C	1A	363958785	+	NA	NA	NA	NA	NA	NA	C	C	C	T	C	C	T	T	C	T	T	T	T	T	T	N	T	T	T	T	T	T	T	T	T	T	T	T	T	T	T	C	T	T	T	T	T	T	T
AX-108796805	T/C	1A	363977813	+	NA	NA	NA	NA	NA	NA	C	C	T	T	C	C	T	T	C	T	T	T	T	T	T	Y	T	T	T	T	T	T	T	T	T	T	T	T	N	T	T	C	T	T	T	T	T	T	T
AX-108738344	A/G	1A	363982293	+	NA	NA	NA	NA	NA	NA	G	G	A	A	G	G	A	A	G	A	A	A	A	A	A	R	A	A	A	A	A	A	A	A	A	A	A	A	A	A	A	G	A	A	A	A	A	A	A
AX-110402102	G/C	1A	364321854	+	NA	NA	NA	NA	NA	NA	C	C	G	G	C	C	G	G	C	G	G	G	G	G	G	G	G	G	G	G	G	G	G	G	G	G	G	G	G	G	G	C	G	G	G	G	G	G	G
AX-109991719	A/G	1A	364746092	+	NA	NA	NA	NA	NA	NA	G	G	G	A	G	G	A	A	G	A	A	A	A	A	A	R	A	A	A	A	A	A	A	A	A	A	A	A	A	A	A	G	N	A	A	A	A	A	A
AX-109499575	C/G	1A	364761564	+	NA	NA	NA	NA	NA	NA	G	G	G	C	G	G	C	C	G	C	C	C	C	C	C	S	C	C	C	C	C	C	C	C	C	C	C	C	C	C	C	G	C	C	C	C	C	C	C
AX-111222871	G/A	1A	365260937	+	NA	NA	NA	NA	NA	NA	N	R	A	G	A	A	G	G	A	G	G	G	G	G	G	R	G	G	G	G	G	G	N	G	G	G	G	G	G	G	G	G	G	G	G	G	G	G	G
AX-110398363	T/C	1A	365426213	+	NA	NA	NA	NA	NA	NA	C	C	C	T	C	C	T	T	C	T	T	T	T	T	T	Y	T	T	T	T	T	T	T	T	T	T	T	T	T	T	T	T	T	T	T	T	T	T	T
AX-110026325	C/T	1A	365426487	+	NA	NA	NA	NA	NA	NA	T	T	T	C	T	T	C	C	T	C	C	C	C	C	C	Y	C	C	C	C	C	C	C	C	C	C	C	C	C	C	C	C	C	C	C	C	C	C	C
AX-89731857	C/T	1A	365426663	+	NA	NA	NA	NA	NA	NA	T	T	T	C	T	T	C	C	T	C	C	C	C	C	C	Y	C	C	C	C	C	C	C	C	C	C	C	C	C	C	C	C	C	C	C	C	C	C	C
AX-94497344	G/A	1A	365479720	+	NA	NA	NA	NA	NA	NA	N	N	A	G	A	A	G	G	A	G	G	G	G	G	G	R	G	G	G	G	G	G	G	G	G	G	G	G	G	G	G	A	G	G	G	G	G	G	G
AX-89485097	A/G	1A	365507388	+	NA	NA	NA	NA	NA	NA	G	G	G	A	G	G	A	G	G	A	A	A	A	A	A	R	A	A	A	A	A	A	A	A	A	A	A	A	G	A	A	G	A	A	A	A	A	A	A
AX-179559579	G/A	1A	365511029	+	NA	NA	NA	NA	NA	NA	A	A	A	G	A	A	G	G	A	G	G	G	G	G	G	R	G	G	G	G	G	G	G	G	G	G	G	G	G	G	G	A	G	G	G	G	G	G	G
AX-95661834	G/A	1A	365511029	+	NA	NA	NA	NA	NA	NA	R	R	A	G	R	A	G	G	A	G	G	G	G	G	G	G	G	G	G	G	G	G	G	G	G	G	G	G	G	G	G	A	G	G	G	G	G	G	G
AX-111050187	C/G	1A	366315069	+	NA	NA	NA	NA	NA	NA	G	G	G	C	G	G	C	C	G	C	C	C	C	C	C	S	C	C	C	C	C	C	C	C	C	C	C	C	N	C	C	G	C	C	C	C	C	C	C
AX-86164353	C/T	1A	366317770	+	NA	NA	NA	NA	NA	NA	T	T	T	C	N	T	C	C	T	C	C	C	C	C	C	Y	C	C	C	C	C	C	N	C	C	C	C	C	C	C	C	T	C	C	C	C	C	C	C
AX-86164354	C/T	1A	366317770	+	NA	NA	NA	NA	NA	NA	T	T	T	C	Y	T	C	C	T	C	C	C	C	C	C	Y	C	C	C	C	C	C	C	C	C	C	C	C	C	C	C	T	C	C	C	C	C	C	C
AX-111792031	A/G	1A	366449730	+	NA	NA	NA	NA	NA	NA	G	G	G	A	G	G	A	G	G	A	A	A	A	A	A	R	A	A	A	A	A	A	A	A	A	A	A	A	G	A	A	G	A	A	A	A	A	A	A
AX-110469982	A/G	1A	366608067	+	NA	NA	NA	NA	NA	NA	G	G	G	A	G	G	A	A	G	A	A	A	A	A	A	R	A	A	A	A	A	A	A	A	A	A	A	A	A	A	A	G	A	A	A	A	A	A	A
AX-110945768	A/G	1A	366688505	+	NA	NA	NA	NA	NA	NA	G	G	G	A	G	G	A	G	G	A	A	A	A	A	A	R	A	A	A	A	A	A	A	A	A	A	A	A	G	A	A	G	A	A	A	A	A	A	A
AX-110495007	T/C	1A	366715565	+	NA	NA	NA	NA	NA	NA	C	C	C	T	C	C	T	C	C	T	T	T	T	T	T	N	T	T	T	T	T	T	T	T	T	T	T	T	C	T	T	C	T	T	T	T	T	T	T
AX-111275681	T/C	1A	367037247	+	NA	NA	NA	NA	NA	NA	Y	Y	C	T	C	C	T	T	C	T	T	T	T	T	T	T	T	T	T	T	T	T	T	T	T	T	T	T	T	T	T	C	T	T	T	T	T	T	T
AX-111030596	G/A	1A	367638353	+	NA	NA	NA	NA	NA	NA	A	R	A	G	A	A	G	G	A	G	G	G	G	G	G	G	G	G	G	G	G	G	G	G	G	G	G	G	G	G	G	A	G	G	G	G	G	G	G
AX-109830558	C/A	1A	367659731	+	NA	NA	NA	NA	NA	NA	A	A	A	C	A	A	C	C	A	C	C	N	C	C	C	M	C	C	C	C	C	C	C	C	C	C	C	C	C	C	C	A	C	C	C	C	C	C	C
AX-109051517	T/C	1A	369856269	+	NA	NA	NA	NA	NA	NA	C	C	C	T	C	C	T	T	C	T	T	T	T	T	T	Y	T	T	T	T	T	T	T	T	T	T	T	T	T	T	T	C	T	T	T	T	T	T	T
AX-109575768	A/G	1A	370836440	+	NA	NA	NA	NA	NA	NA	R	R	G	A	G	G	A	A	G	A	A	A	A	A	A	A	A	A	A	A	A	A	A	A	A	A	A	A	A	A	A	G	A	A	A	A	A	A	A
AX-109476033	C/A	1A	370980358	+	NA	NA	NA	NA	NA	NA	A	A	A	C	A	A	C	C	A	C	C	C	C	C	C	M	C	C	C	C	C	N	N	C	C	C	C	C	C	C	C	A	C	C	C	C	C	C	C
AX-94636081	A/G	1A	371409502	+	NA	NA	NA	NA	NA	NA	A	A	G	A	A	N	A	N	A	N	A	N	A	A	A	N	A	A	A	A	A	N	A	A	N	A	N	A	A	A	A	G	A	A	A	A	A	A	A
AX-112290448	C/T	1A	371639613	+	NA	NA	NA	NA	NA	NA	C	C	C	C	C	C	C	C	C	C	C	T	C	C	C	C	Y	C	C	C	C	C	Y	C	C	C	C	Y	C	T	Y	T	C	C	C	Y	C	T	C
AX-179557285	C/T	1A	371639613	+	NA	NA	NA	NA	NA	NA	C	C	C	C	C	C	C	C	C	C	C	T	C	C	C	C	T	C	C	C	C	C	T	C	C	C	C	T	C	T	T	T	C	C	C	T	C	T	C
AX-179559707	C/T	1A	371641076	+	NA	NA	NA	NA	NA	NA	C	C	T	C	C	C	C	C	C	C	C	C	C	C	C	C	C	C	C	C	C	C	Y	C	C	C	C	C	C	C	C	T	C	C	C	C	C	C	C
AX-94615576	G/C	1A	372202450	+	NA	NA	NA	NA	NA	NA	C	C	G	G	G	C	G	C	C	G	G	N	G	G	G	C	C	G	C	G	G	G	C	G	G	N	G	C	G	C	C	G	G	G	G	G	G	G	G
AX-111631809	T/G	1A	372255189	+	NA	NA	NA	NA	NA	NA	T	N	G	T	T	T	T	T	T	T	T	T	T	T	T	T	T	T	T	T	T	T	T	T	T	T	T	N	T	T	T	G	T	G	T	T	T	T	G
AX-111235549	G/T	1A	372885792	+	NA	NA	NA	NA	NA	NA	T	T	G	G	T	T	G	G	T	G	G	G	G	G	G	K	G	G	G	G	G	G	G	G	G	G	G	G	G	G	G	T	G	T	G	G	G	G	T
AX-109318272	A/C	1A	373561934	+	NA	NA	NA	NA	NA	NA	C	C	C	A	C	C	A	C	C	A	A	A	A	A	A	M	A	A	A	A	A	A	A	A	A	A	A	A	A	A	A	C	A	C	A	A	A	A	C
AX-109960352	A/G	1A	373661955	+	NA	NA	NA	NA	NA	NA	G	G	G	A	G	G	A	G	G	A	A	A	A	A	A	R	A	A	A	A	A	A	A	A	A	A	A	A	A	A	A	G	A	G	A	A	A	A	G
AX-109319362	G/A	1A	373665000	+	NA	NA	NA	NA	NA	NA	A	A	A	G	A	A	G	A	A	G	G	G	G	G	G	R	G	G	G	G	G	G	G	G	G	G	G	G	G	G	G	A	G	A	G	G	G	G	A
AX-111173814	C/T	1A	374294628	+	NA	NA	NA	NA	NA	NA	C	C	T	C	C	C	C	C	C	C	C	C	C	C	C	C	C	C	C	C	C	C	C	C	C	C	C	C	C	C	C	T	C	T	C	C	C	C	T
AX-95190148	A/G	1A	374437142	+	NA	NA	NA	NA	NA	NA	R	R	G	A	A	G	A	G	G	A	A	G	A	A	A	R	R	A	A	A	A	A	R	A	A	G	A	R	R	G	R	A	A	A	A	A	A	A	A
AX-111642799	G/A	1A	374464267	+	NA	NA	NA	NA	NA	NA	A	A	A	G	A	A	G	G	A	G	G	G	G	G	G	R	G	G	G	G	G	G	G	G	G	G	G	G	G	G	G	N	G	A	G	G	G	G	A
AX-111482821	T/C	1A	374535187	+	NA	NA	NA	NA	NA	NA	C	C	C	T	C	C	T	C	C	T	T	N	T	T	T	Y	T	T	T	T	T	T	T	T	T	T	T	N	T	T	T	C	T	C	T	T	T	T	C
AX-109403683	G/C	1A	374586544	+	NA	NA	NA	NA	NA	NA	C	N	C	G	C	C	G	G	C	G	G	G	G	G	G	S	N	G	G	G	G	G	G	G	G	G	G	G	G	G	G	C	G	C	G	G	G	G	C
AX-111029710	G/A	1A	374803063	+	NA	NA	NA	NA	NA	NA	A	A	A	G	A	A	G	G	A	G	G	G	G	G	G	R	G	G	G	G	G	G	G	G	G	G	G	G	G	G	G	A	G	A	G	G	G	G	A
AX-111560847	T/C	1A	374895163	+	NA	NA	NA	NA	NA	NA	Y	Y	C	T	C	C	T	C	C	T	T	T	T	T	T	N	T	T	T	T	T	T	T	T	T	T	T	T	T	T	T	C	T	Y	T	T	T	T	Y
AX-95235150	C/G	1A	374921601	+	NA	NA	NA	NA	NA	NA	C	C	G	C	C	C	C	C	C	C	C	C	C	C	C	C	C	C	C	C	C	C	C	C	C	C	C	C	C	C	C	G	C	G	C	C	C	C	G
AX-111673303	A/G	1A	375075174	+	NA	NA	NA	NA	NA	NA	G	G	G	A	G	G	A	A	G	A	A	A	A	A	A	R	A	A	A	A	A	A	A	A	A	A	A	A	A	A	A	G	A	G	A	A	A	A	G
AX-111072193	A/G	1A	376220980	+	NA	NA	NA	NA	NA	NA	N	R	G	A	G	N	A	A	G	A	A	A	A	A	A	A	A	A	A	A	A	A	A	A	A	A	A	A	A	A	A	G	A	R	A	A	A	A	R
AX-109531206	T/C	1A	377085924	+	NA	NA	NA	NA	NA	NA	C	C	C	T	C	C	T	T	C	T	T	Y	T	T	T	Y	T	T	T	T	T	T	T	T	T	T	T	T	T	T	T	C	T	C	T	T	T	T	C
AX-111632641	C/T	1A	377448069	+	NA	NA	NA	NA	NA	NA	T	T	T	C	T	T	C	T	T	C	C	C	C	C	C	Y	C	C	C	C	C	C	C	C	C	C	C	C	C	C	C	T	C	T	C	C	C	C	T
AX-108894614	A/G	1A	377724355	+	NA	NA	NA	NA	NA	NA	G	N	G	A	G	G	A	G	G	A	A	G	A	A	A	R	A	A	A	A	A	A	A	A	A	A	G	A	G	A	A	G	A	G	A	A	A	A	G
AX-109949978	C/T	1A	378474913	+	NA	NA	NA	NA	NA	NA	C	C	T	C	C	C	C	C	C	C	C	C	C	C	C	C	C	C	C	C	C	C	C	C	C	C	C	C	C	C	C	T	C	T	C	C	C	C	T
AX-109485299	G/A	1A	378584211	+	NA	NA	NA	NA	NA	NA	G	G	A	G	G	G	G	G	G	G	G	G	G	G	G	G	G	G	G	G	G	G	G	G	G	G	G	G	G	G	G	A	G	A	G	G	G	G	A
AX-86167428	A/G	1A	378588072	+	NA	NA	NA	NA	NA	NA	A	A	G	A	A	A	A	A	A	A	A	A	A	A	A	A	A	A	A	A	A	A	A	A	A	A	A	A	A	A	A	G	A	G	A	A	A	A	G
AX-86167429	A/G	1A	378588072	+	NA	NA	NA	NA	NA	NA	A	A	G	A	A	A	A	A	A	A	A	A	A	A	A	A	A	A	A	A	A	A	A	A	A	A	A	A	A	A	A	G	A	G	A	A	A	A	G
AX-112287364	A/C	1A	378985613	+	NA	NA	NA	NA	NA	NA	M	M	A	A	C	C	A	A	C	A	A	A	A	A	A	A	A	A	A	A	A	A	A	A	A	A	A	A	A	A	A	C	N	M	A	A	A	A	M
AX-179558627	A/C	1A	378985613	+	NA	NA	NA	NA	NA	NA	C	C	A	A	C	C	A	A	C	A	A	A	A	A	A	M	A	A	A	A	A	A	A	A	A	A	A	A	A	A	A	C	A	C	A	A	A	A	C
AX-108795109	G/A	1A	378987587	+	NA	NA	NA	NA	NA	NA	A	A	A	G	A	A	G	N	A	G	G	G	G	R	R	A	R	G	R	R	G	R	R	R	G	G	G	R	R	G	R	A	G	A	G	R	G	G	A
AX-110363707	C/G	1A	378989398	+	NA	NA	NA	NA	NA	NA	G	G	C	C	S	G	C	C	G	C	C	C	C	C	C	N	C	C	C	C	C	C	C	C	C	C	C	C	C	C	C	G	C	G	C	C	C	C	G
AX-86168353	A/G	1A	378993806	+	NA	NA	NA	NA	NA	NA	G	G	A	A	G	G	A	A	G	A	A	R	A	R	R	R	R	A	R	R	A	R	R	R	A	A	A	R	R	A	R	G	A	G	A	R	A	A	G
AX-179560095	T/C	1A	379001217	+	NA	NA	NA	NA	NA	NA	C	C	C	T	C	C	T	C	C	T	T	T	T	T	T	N	T	T	T	T	T	N	T	T	T	T	T	T	T	T	T	C	T	C	T	T	T	T	C
AX-94517594	T/C	1A	379001217	+	NA	NA	NA	NA	NA	NA	C	Y	C	T	C	C	T	C	C	T	T	T	T	T	T	N	T	T	T	T	T	T	T	T	T	T	T	T	N	T	T	C	T	C	T	T	T	T	C
AX-110035801	T/C	1A	380000816	+	NA	NA	NA	NA	NA	NA	C	C	T	T	C	C	T	T	C	T	T	T	T	T	T	Y	T	T	T	T	T	T	T	T	T	T	T	T	T	T	T	C	T	C	T	T	T	T	C
AX-110013951	A/G	1A	380006466	+	NA	NA	NA	NA	NA	NA	G	G	A	A	G	G	A	A	G	A	A	A	A	A	A	R	A	A	A	A	A	A	A	A	A	A	A	A	A	A	A	G	A	G	A	A	A	A	G
AX-110122404	C/T	1A	380086274	+	NA	NA	NA	NA	NA	NA	T	T	C	C	T	T	C	C	T	C	C	C	C	C	C	Y	C	C	C	C	C	C	C	C	C	C	C	C	C	C	C	T	C	T	C	C	C	C	T
AX-109291439	G/C	1A	380086698	+	NA	NA	NA	NA	NA	NA	C	C	G	G	C	C	G	G	C	G	G	G	G	G	G	S	G	G	G	G	G	G	G	G	G	G	G	G	G	G	G	C	G	C	G	G	G	G	C
AX-111074693	C/T	1A	380435057	+	NA	NA	NA	NA	NA	NA	T	T	T	C	T	T	C	C	T	C	C	C	C	C	C	Y	C	C	C	C	C	C	C	C	C	C	C	C	C	C	C	T	C	T	C	C	C	C	T
AX-179559839	T/C	1A	380778594	+	NA	NA	NA	NA	NA	NA	C	C	C	T	C	C	T	T	C	T	T	T	T	T	T	N	T	T	T	T	T	T	N	T	T	T	T	T	T	T	T	C	T	C	T	T	T	T	C
AX-95631684	T/C	1A	380778594	+	NA	NA	NA	NA	NA	NA	C	C	C	T	C	C	T	T	C	T	T	T	T	T	T	Y	T	T	T	T	T	T	T	T	T	T	T	T	T	T	T	C	T	C	T	T	T	T	C
AX-110109082	C/A	1A	381126216	+	NA	NA	NA	NA	NA	NA	A	A	C	C	A	A	C	C	A	M	C	C	C	C	C	N	C	C	C	C	C	C	C	C	C	C	C	C	C	C	C	A	C	A	C	C	C	C	A
AX-109981727	C/T	1A	381173068	+	NA	NA	NA	NA	NA	NA	T	T	C	C	T	T	C	C	T	C	C	N	C	C	C	Y	C	C	C	C	C	C	C	C	C	C	C	C	C	C	C	T	C	T	C	C	C	C	T
AX-110976518	A/G	1A	381173682	+	NA	NA	NA	NA	NA	NA	G	G	A	A	G	G	A	A	G	A	A	A	A	A	A	R	A	A	A	A	A	A	A	A	A	A	A	A	A	A	A	G	A	G	A	A	A	A	G
AX-108832737	A/G	1A	381174076	+	NA	NA	NA	NA	NA	NA	G	G	G	A	G	G	A	A	G	A	A	A	A	A	A	N	A	A	A	A	A	A	A	A	A	A	A	A	A	A	A	G	A	G	A	A	A	A	G
AX-110377012	T/C	1A	381185410	+	NA	NA	NA	NA	NA	NA	C	C	T	T	C	C	T	T	C	T	T	T	T	T	T	Y	T	T	T	T	T	T	T	T	T	T	T	T	T	T	T	C	T	C	T	T	T	T	C
AX-109389941	G/A	1A	381187346	+	NA	NA	NA	NA	NA	NA	R	R	G	G	R	R	G	G	R	G	G	N	G	G	G	N	G	G	G	G	G	G	G	G	G	G	G	G	G	G	G	A	G	A	G	G	G	G	A
AX-110919544	G/A	1A	381197789	+	NA	NA	NA	NA	NA	NA	A	A	G	G	R	A	G	G	A	G	G	G	G	G	G	R	G	G	G	G	G	G	G	G	G	G	G	G	G	G	G	A	G	A	G	G	G	G	A
AX-110368637	A/G	1A	381200010	+	NA	NA	NA	NA	NA	NA	G	G	G	A	G	G	A	A	G	A	A	A	A	A	A	R	A	A	A	A	A	A	A	A	A	A	A	A	A	A	A	G	A	G	A	A	A	A	G
AX-110079192	G/C	1A	381261382	+	NA	NA	NA	NA	NA	NA	C	C	G	G	C	C	G	G	C	G	G	G	G	G	G	S	G	G	G	G	G	G	S	G	G	G	G	G	G	G	G	C	G	C	G	G	G	G	C
AX-108904016	G/C	1A	381485804	+	NA	NA	NA	NA	NA	NA	C	C	G	G	C	C	G	G	C	G	G	G	G	G	G	S	G	G	G	G	G	G	S	G	G	G	G	G	G	G	G	C	G	C	G	G	G	G	C
AX-109399717	C/T	1A	381526560	+	NA	NA	NA	NA	NA	NA	T	T	C	C	T	T	C	C	T	C	C	C	C	C	C	Y	C	C	C	C	C	C	C	C	C	C	C	C	C	C	C	T	C	T	C	C	C	C	T
AX-110919528	A/G	1A	381561013	+	NA	NA	NA	NA	NA	NA	G	G	A	A	G	G	A	A	G	A	A	A	A	A	A	R	A	A	A	A	A	A	A	A	A	A	A	A	A	A	A	G	A	G	A	A	A	A	G
AX-110577138	C/T	1A	381790141	+	NA	NA	NA	NA	NA	NA	T	T	C	C	T	T	C	C	T	C	C	C	C	C	C	Y	C	C	C	C	C	C	Y	C	C	C	C	C	C	C	C	T	C	T	C	C	C	C	T
AX-111065621	C/T	1A	381825692	+	NA	NA	NA	NA	NA	NA	T	T	C	C	T	T	C	C	T	C	C	N	C	C	C	Y	C	C	C	C	C	C	C	C	C	C	C	C	C	C	C	T	C	T	C	C	N	C	T
AX-108908911	G/A	1A	381863123	+	NA	NA	NA	NA	NA	NA	A	A	G	G	A	A	G	G	A	G	G	G	G	G	G	R	G	G	G	G	G	G	G	G	G	G	G	G	G	G	G	A	G	A	G	G	G	G	A
AX-108960548	C/T	1A	381863460	+	NA	NA	NA	NA	NA	NA	T	T	C	C	T	T	C	C	T	C	C	C	C	C	C	Y	C	C	C	C	C	C	C	C	C	C	C	C	C	C	C	T	C	T	C	C	C	C	T
AX-109288149	C/A	1A	381863753	+	NA	NA	NA	NA	NA	NA	A	A	C	C	A	A	C	C	A	C	C	C	C	C	C	M	C	C	C	C	C	C	C	C	C	C	C	C	C	C	C	A	C	A	C	C	C	C	A
AX-110707098	T/C	1A	381949881	+	NA	NA	NA	NA	NA	NA	C	C	C	T	C	C	T	T	C	T	T	T	T	T	T	Y	T	T	T	T	T	T	T	T	T	T	T	T	T	T	T	C	T	C	T	T	T	T	C
AX-108834933	T/C	1A	382021485	+	NA	NA	NA	NA	NA	NA	C	C	T	T	C	C	T	T	C	T	T	T	T	T	T	Y	T	T	T	T	T	T	T	T	T	T	T	T	T	T	T	C	T	C	T	T	T	T	C
AX-111005170	T/C	1A	382083705	+	NA	NA	NA	NA	NA	NA	C	C	T	T	C	C	T	T	C	T	T	T	T	T	T	Y	T	T	T	T	T	T	T	T	T	T	T	T	T	T	T	C	T	C	T	T	T	T	C
AX-111255399	A/G	1A	382469575	+	NA	NA	NA	NA	NA	NA	G	G	A	A	G	G	A	A	G	A	A	A	A	A	A	A	A	A	A	A	A	A	A	A	A	A	A	A	A	A	A	G	A	G	A	A	A	A	G
AX-110420974	C/T	1A	382704268	+	NA	NA	NA	NA	NA	NA	T	T	C	C	T	T	C	C	T	C	C	C	C	C	C	Y	C	C	C	C	C	C	C	N	C	C	C	C	N	C	C	T	C	T	C	C	C	C	T
AX-111638533	G/A	1A	382766327	+	NA	NA	NA	NA	NA	NA	A	A	G	G	A	A	G	G	A	G	G	G	G	G	G	R	G	G	G	G	G	G	G	G	G	G	G	G	G	G	G	A	G	A	G	G	G	G	A
AX-110720323	G/A	1A	382771156	+	NA	NA	NA	NA	NA	NA	A	A	G	G	A	A	G	G	A	G	G	G	G	G	G	R	G	G	G	G	G	G	G	G	G	G	G	G	G	G	G	A	G	A	G	G	G	G	A
AX-94441027	C/T	1A	382851263	+	NA	NA	NA	NA	NA	NA	T	T	C	C	T	T	C	C	T	C	C	C	C	C	C	Y	C	C	C	C	C	C	C	C	C	C	C	C	C	C	C	T	C	T	C	C	C	C	T
AX-111542950	C/T	1A	383055097	+	NA	NA	NA	NA	NA	NA	T	T	C	C	T	T	C	C	T	C	C	C	C	C	C	Y	C	C	C	C	C	C	C	C	C	C	T	C	C	C	C	T	C	T	C	C	C	C	T
AX-109846342	A/T	1A	383154223	+	NA	NA	NA	NA	NA	NA	T	T	A	A	W	T	A	A	T	A	A	A	A	A	A	W	A	A	A	A	A	A	A	A	A	A	A	A	N	A	A	T	A	T	A	A	A	A	T
AX-110978709	A/C	1A	383260777	+	NA	NA	NA	NA	NA	NA	C	C	C	A	C	C	A	A	C	A	A	A	A	A	A	M	A	A	A	A	A	A	A	A	A	A	A	A	A	A	A	C	A	C	A	A	A	A	C
AX-108956678	T/C	1A	383348177	+	NA	NA	NA	NA	NA	NA	C	C	T	T	C	C	T	T	C	T	T	T	T	T	T	Y	T	T	T	T	T	T	T	T	T	T	T	T	T	T	T	C	T	C	T	T	T	T	C
AX-110440920	G/A	1A	383383027	+	NA	NA	NA	NA	NA	NA	A	A	G	G	A	A	G	G	A	G	G	G	G	G	G	R	G	G	G	G	G	G	G	G	G	G	G	G	G	G	G	A	G	A	G	G	G	G	A
AX-95653084	G/A	1A	383538340	+	NA	NA	NA	NA	NA	NA	A	A	A	G	A	A	G	G	A	G	G	G	G	G	G	R	G	G	G	G	G	G	G	G	G	G	G	G	G	G	G	A	G	A	G	G	G	G	A
AX-109377539	A/G	1A	383541603	+	NA	NA	NA	NA	NA	NA	G	G	A	A	G	G	A	A	G	A	A	A	A	A	A	R	A	A	A	A	A	A	A	A	A	A	A	A	A	A	A	G	A	G	A	A	A	A	G
AX-110026287	C/T	1A	383632178	+	NA	NA	NA	NA	NA	NA	T	T	C	C	T	T	C	C	T	C	C	C	C	C	C	Y	C	C	C	C	C	C	C	C	C	C	C	C	C	C	C	T	C	T	C	C	C	C	T
AX-109274688	G/A	1A	383632723	+	NA	NA	NA	NA	NA	NA	A	A	G	G	A	A	G	G	A	G	G	G	G	G	G	R	G	G	G	G	G	G	G	G	G	G	G	G	G	G	G	A	G	A	G	G	G	G	A
AX-110448986	C/T	1A	383819301	+	NA	NA	NA	NA	NA	NA	T	T	C	C	T	T	C	C	T	C	C	N	C	C	C	Y	C	C	C	C	C	C	C	C	C	C	C	C	C	C	C	T	C	T	C	C	C	C	T
AX-109378522	T/C	1A	383822897	+	NA	NA	NA	NA	NA	NA	C	C	T	T	C	C	T	T	C	T	T	T	T	T	T	Y	T	T	T	T	T	T	T	T	T	T	T	T	T	T	T	C	T	C	T	T	T	T	C
AX-111075850	G/A	1A	383833525	+	NA	NA	NA	NA	NA	NA	A	A	G	G	A	A	G	G	A	G	G	G	G	G	G	R	G	G	G	G	G	G	G	G	G	G	G	G	G	G	G	A	G	A	G	G	G	G	A
AX-109368678	T/C	1A	383882933	+	NA	NA	NA	NA	NA	NA	C	C	T	T	C	C	T	T	C	T	T	T	T	T	T	N	T	T	T	T	T	T	T	T	T	T	T	T	T	T	T	C	T	C	T	T	T	T	C
AX-95244447	T/C	1A	383887246	+	NA	NA	NA	NA	NA	NA	C	C	C	T	C	C	T	T	C	T	T	T	T	T	T	Y	T	T	T	T	T	T	N	T	T	T	T	N	T	T	T	C	T	C	T	T	T	T	C
AX-111254001	A/G	1A	383961508	+	NA	NA	NA	NA	NA	NA	G	G	A	A	G	G	A	A	G	A	A	A	A	A	A	R	A	A	A	A	A	A	A	A	A	A	A	A	A	A	A	G	A	G	A	N	A	A	G
AX-110491273	G/A	1A	383980830	+	NA	NA	NA	NA	NA	NA	A	A	G	G	A	A	G	G	A	G	G	G	G	G	G	R	G	G	G	G	G	G	G	G	G	G	G	G	G	G	G	A	G	A	G	G	G	G	A
AX-111165959	C/T	1A	383981603	+	NA	NA	NA	NA	NA	NA	T	T	C	C	T	T	C	C	T	C	C	C	C	C	C	Y	C	C	C	C	C	C	C	C	C	C	C	C	C	C	C	T	C	T	C	C	C	C	T
AX-109983041	C/G	1A	383984785	+	NA	NA	NA	NA	NA	NA	G	G	C	C	G	G	C	C	G	C	C	S	C	C	C	S	C	C	C	C	C	C	C	C	C	C	C	C	C	C	C	G	C	G	C	C	C	C	G
AX-108761765	C/G	1A	383985788	+	NA	NA	NA	NA	NA	NA	G	G	N	C	G	G	C	C	G	C	C	C	C	C	C	S	C	C	C	C	C	C	C	C	C	C	C	C	C	C	C	G	C	G	C	C	C	C	G
AX-94396150	C/T	1A	384308273	+	NA	NA	NA	NA	NA	NA	T	T	Y	C	Y	T	C	C	T	C	C	Y	C	Y	Y	T	Y	C	Y	Y	C	Y	Y	Y	T	C	C	Y	Y	C	Y	T	N	T	C	Y	C	C	T
AX-95631161	C/T	1A	384308273	+	NA	NA	NA	NA	NA	NA	T	T	T	C	T	T	T	C	T	T	C	T	C	Y	Y	N	Y	T	N	Y	C	Y	Y	Y	C	T	T	Y	Y	C	N	T	C	T	C	Y	C	C	T
AX-94621604	C/G	1A	384314616	+	NA	NA	NA	NA	NA	NA	G	G	G	C	G	G	C	C	G	C	C	C	C	C	C	S	C	C	C	C	C	C	C	C	C	C	C	C	C	C	C	G	C	G	C	C	C	C	G
AX-110580405	C/T	1A	384315577	+	NA	NA	NA	NA	NA	NA	T	T	T	C	T	T	C	C	T	C	C	N	C	C	C	Y	C	C	C	C	C	C	C	C	C	C	C	C	C	C	C	T	C	T	C	C	C	C	T
AX-108849458	C/A	1A	384315711	+	NA	NA	NA	NA	NA	NA	A	A	C	C	A	A	C	C	A	C	C	M	C	C	C	M	C	C	C	C	C	C	C	C	C	C	C	C	C	C	C	A	C	A	C	C	C	C	A
AX-110129617	C/T	1A	384629407	+	NA	NA	NA	NA	NA	NA	T	Y	C	C	T	T	C	C	T	C	C	C	C	C	C	N	C	C	C	C	C	C	C	C	C	C	C	C	C	C	C	T	C	Y	C	C	C	C	T
AX-109443579	C/T	1A	384669812	+	NA	NA	NA	NA	NA	NA	T	T	C	C	T	T	C	C	T	C	C	Y	C	C	C	N	C	C	C	C	C	C	C	C	C	C	C	C	C	C	C	T	C	T	C	C	C	C	T
AX-110473691	C/T	1A	384674246	+	NA	NA	NA	NA	NA	NA	T	N	C	C	T	T	C	C	T	C	C	N	C	C	C	Y	C	C	C	C	C	C	Y	C	C	C	C	C	C	C	C	T	C	T	C	C	C	C	T
AX-109286534	C/G	1A	384789442	+	NA	NA	NA	NA	NA	NA	G	G	C	C	G	G	C	C	G	C	C	N	C	C	C	S	C	C	C	C	C	C	C	C	C	C	C	S	C	C	C	G	C	G	C	C	C	C	G
AX-111600219	C/T	1A	384865566	+	NA	NA	NA	NA	NA	NA	T	T	C	C	T	T	C	C	T	C	C	C	C	C	C	Y	C	C	C	C	C	C	C	C	C	C	C	C	C	C	C	T	C	T	C	C	C	C	T
AX-111034865	T/C	1A	384895545	+	NA	NA	NA	NA	NA	NA	C	C	T	T	C	C	T	T	C	T	T	T	T	T	T	Y	T	T	T	T	T	T	T	T	T	T	T	T	T	T	T	C	T	C	T	T	T	T	C
AX-109817156	G/T	1A	385238877	+	NA	NA	NA	NA	NA	NA	T	T	G	G	T	T	G	G	T	G	G	G	G	G	G	K	G	G	G	G	G	G	G	G	G	G	G	G	G	G	G	T	G	T	G	G	G	G	T
AX-95652656	A/C	1A	385400896	+	NA	NA	NA	NA	NA	NA	C	C	C	A	A	C	A	C	C	A	A	A	A	A	A	M	C	A	C	A	A	A	A	A	A	C	A	C	C	C	C	A	A	A	A	A	A	A	A
AX-110557271	G/T	1A	385616907	+	NA	NA	NA	NA	NA	NA	T	T	G	G	T	T	G	G	T	G	G	G	G	G	G	G	G	G	N	G	G	G	G	G	G	G	G	G	G	G	G	T	G	T	G	G	G	G	T
AX-110054186	C/T	1A	385671476	+	NA	NA	NA	NA	NA	NA	Y	Y	C	C	T	T	C	C	T	C	C	C	C	C	C	N	C	C	C	C	C	C	C	C	C	C	C	C	C	C	C	T	C	Y	C	C	C	C	Y
AX-111485910	C/T	1A	385812268	+	NA	NA	NA	NA	NA	NA	T	T	C	C	T	T	C	C	T	C	C	C	C	C	C	Y	C	C	C	C	C	C	C	C	C	C	C	C	C	C	C	T	C	T	C	C	C	C	T
AX-109328653	A/C	1A	385850790	+	NA	NA	NA	NA	NA	NA	C	C	C	A	C	C	A	A	C	A	A	A	A	A	A	M	A	A	A	A	A	A	A	A	A	A	A	A	A	A	A	C	A	C	A	A	A	A	C
AX-108729253	A/G	1A	385852122	+	NA	NA	NA	NA	NA	NA	G	G	A	A	G	G	A	A	G	A	A	N	A	A	A	R	A	A	A	A	A	A	A	A	A	A	A	A	A	A	A	G	A	G	A	A	A	A	G
AX-108766638	T/C	1A	385852318	+	NA	NA	NA	NA	NA	NA	C	C	T	T	C	C	T	T	C	T	T	T	T	T	T	Y	T	T	T	T	T	T	T	T	T	T	T	T	T	T	T	C	T	C	T	T	T	T	C
AX-95178074	G/A	1A	385886579	+	NA	NA	NA	NA	NA	NA	R	R	G	G	G	A	G	R	R	G	G	G	G	G	G	G	R	G	G	G	G	G	G	G	G	N	G	R	G	R	R	G	G	G	G	G	G	G	G
AX-110542614	C/T	1A	385895693	+	NA	NA	NA	NA	NA	NA	T	T	C	C	T	T	C	C	T	C	C	C	C	C	C	Y	C	C	C	C	C	C	C	C	C	C	C	C	C	C	C	T	C	T	C	C	C	C	T
AX-109931799	C/T	1A	385980207	+	NA	NA	NA	NA	NA	NA	T	T	T	C	T	T	C	C	T	C	C	C	C	C	C	Y	C	C	C	C	C	C	C	C	C	C	C	C	C	C	C	T	C	T	C	C	C	C	T
AX-109384586	C/A	1A	386282296	+	NA	NA	NA	NA	NA	NA	A	A	C	C	A	A	C	C	A	C	C	C	C	C	C	M	C	C	C	C	C	C	C	C	C	C	C	C	C	C	C	A	C	A	C	C	C	C	A
AX-95629029	G/T	1A	386285635	+	NA	NA	NA	NA	NA	NA	T	T	G	G	T	T	G	G	T	G	G	G	G	G	G	K	G	G	G	G	G	G	G	G	G	G	G	G	G	G	G	T	G	T	G	G	G	G	T
AX-86178528	T/C	1A	386499050	+	NA	NA	NA	NA	NA	NA	C	C	T	T	C	C	T	T	C	T	T	T	T	Y	Y	C	Y	T	Y	Y	T	Y	Y	Y	T	T	T	Y	Y	T	Y	C	T	C	T	Y	T	T	C
AX-111745515	A/G	1A	386499962	+	NA	NA	NA	NA	NA	NA	G	G	A	A	G	G	A	A	G	A	A	A	A	A	A	R	A	A	A	A	A	A	A	A	A	A	A	A	A	A	A	G	A	G	A	A	A	A	G
AX-109076980	G/A	1A	387473802	+	NA	NA	NA	NA	NA	NA	A	A	G	G	A	A	G	G	A	G	G	G	G	G	G	R	G	G	G	G	G	G	G	G	G	G	G	G	G	G	G	A	G	A	G	G	G	G	A
AX-109490765	C/G	1A	387680954	+	NA	NA	NA	NA	NA	NA	G	G	C	C	G	G	C	C	G	C	C	N	C	C	C	S	C	C	C	C	C	C	C	C	C	C	C	C	C	C	C	G	C	G	C	C	C	C	G
AX-110982154	C/T	1A	387982514	+	NA	NA	NA	NA	NA	NA	T	T	C	C	T	T	C	C	T	C	C	C	C	C	C	Y	C	C	C	C	C	C	C	C	C	C	C	C	C	C	C	T	C	T	C	C	C	C	T
AX-109359225	T/C	1A	389169106	+	NA	NA	NA	NA	NA	NA	C	C	T	T	C	C	T	T	C	T	T	T	T	T	T	Y	T	T	T	T	T	T	T	T	T	T	T	T	T	T	T	C	T	C	T	T	T	T	C
AX-108776387	G/A	1A	389588409	+	NA	NA	NA	NA	NA	NA	A	A	G	G	A	A	G	G	A	G	G	N	G	G	G	R	G	G	G	G	G	G	G	G	G	G	G	G	G	G	G	A	G	A	G	G	G	G	A
AX-108837994	C/T	1A	389598618	+	NA	NA	NA	NA	NA	NA	T	T	C	C	T	T	C	C	T	C	C	C	C	C	C	Y	C	C	C	C	C	C	C	C	C	C	C	C	C	C	C	T	C	T	C	C	C	C	T
AX-110073120	T/C	1A	389748704	+	NA	NA	NA	NA	NA	NA	C	C	C	T	C	C	T	T	C	T	T	T	T	T	T	Y	T	T	T	T	T	T	T	T	T	T	T	T	T	T	T	C	T	C	T	T	T	T	C
AX-110076872	T/C	1A	389781823	+	NA	NA	NA	NA	NA	NA	C	C	C	T	C	C	T	T	C	T	T	T	T	Y	Y	Y	Y	T	Y	Y	T	Y	Y	Y	T	T	T	Y	Y	T	Y	C	T	C	T	Y	T	T	C
AX-95683893	T/C	1A	389781823	+	NA	NA	NA	NA	NA	NA	C	C	C	Y	C	C	T	Y	C	T	Y	T	Y	T	T	N	T	T	T	T	Y	T	T	T	T	T	T	T	N	Y	T	C	Y	C	Y	T	Y	Y	C
AX-108728888	A/G	1A	390121391	+	NA	NA	NA	NA	NA	NA	G	G	A	A	G	G	A	A	G	A	A	A	A	A	A	R	A	A	A	A	A	A	A	A	A	A	A	A	A	A	A	G	A	G	A	A	A	A	G
AX-108980040	T/C	1A	390123881	+	NA	NA	NA	NA	NA	NA	C	C	C	T	C	C	T	T	C	T	T	T	T	T	T	Y	T	T	T	T	T	T	T	T	T	T	T	T	T	T	T	C	T	C	T	T	T	T	C
AX-179558638	G/A	1A	390124431	+	NA	NA	NA	NA	NA	NA	R	N	A	G	A	A	A	G	A	A	G	A	G	G	G	G	R	A	R	G	G	G	N	G	G	A	A	R	R	A	R	A	G	G	G	G	G	G	G
AX-110495557	C/T	1A	390601044	+	NA	NA	NA	NA	NA	NA	T	T	T	C	T	T	C	C	T	C	C	C	C	C	C	Y	C	C	C	C	C	C	C	C	C	C	C	C	C	C	C	T	C	T	C	C	C	C	T
AX-94423447	A/G	1A	390602051	+	NA	NA	NA	NA	NA	NA	G	G	G	A	G	G	A	A	G	A	A	A	A	A	A	R	A	A	A	A	A	A	R	A	A	A	A	A	A	A	A	G	A	G	A	N	A	A	G
AX-109863151	G/A	1A	390835110	+	NA	NA	NA	NA	NA	NA	A	A	G	G	A	A	G	G	A	G	G	G	G	G	G	R	G	G	G	G	G	G	G	G	G	G	G	G	G	G	G	A	G	A	G	G	G	G	A
AX-179560046	C/T	1A	390983106	+	NA	NA	NA	NA	NA	NA	Y	Y	N	C	Y	T	C	C	T	C	C	C	C	C	C	C	C	C	C	C	C	C	C	C	C	C	C	C	N	C	C	T	C	Y	C	C	C	C	Y
AX-95659264	C/T	1A	390983106	+	NA	NA	NA	NA	NA	NA	Y	Y	T	C	Y	T	C	C	T	C	C	C	C	C	C	Y	C	C	C	C	C	C	C	C	C	C	C	C	C	C	C	T	C	Y	C	C	C	C	Y
AX-179561820	A/C	1A	390986530	+	NA	NA	NA	NA	NA	NA	C	C	M	A	M	C	C	A	C	C	A	C	A	M	M	N	M	C	M	M	A	M	M	M	A	C	C	M	M	A	M	C	A	C	A	M	A	A	C
AX-95654114	A/C	1A	390986530	+	NA	NA	NA	NA	NA	NA	C	C	C	A	C	C	A	A	C	A	A	N	A	M	M	M	M	A	M	M	A	M	M	M	A	A	A	M	M	A	M	C	A	C	A	M	A	A	C
AX-89452326	T/C	1A	390986544	+	NA	NA	NA	NA	NA	NA	C	C	C	T	C	C	T	T	C	T	T	T	T	T	T	Y	T	T	T	T	T	T	T	T	T	T	T	T	T	T	T	C	T	C	T	T	T	T	C
AX-111638846	G/C	1A	391002850	+	NA	NA	NA	NA	NA	NA	C	C	C	G	C	C	G	G	C	S	G	G	G	G	G	S	G	G	G	G	G	G	G	G	G	G	G	G	G	G	G	C	G	C	G	G	G	G	C
AX-110038261	G/A	1A	391010075	+	NA	NA	NA	NA	NA	NA	A	A	A	G	A	A	G	G	A	G	G	G	G	G	G	R	G	G	G	G	G	G	G	G	G	G	G	G	G	G	G	A	G	A	G	G	G	G	A
AX-111638604	G/A	1A	391274350	+	NA	NA	NA	NA	NA	NA	A	A	G	G	A	A	G	G	A	G	G	G	G	G	G	R	G	G	G	G	G	G	G	G	G	G	G	G	G	G	G	A	G	A	G	G	G	G	A
AX-95679558	T/C	1A	391571554	+	NA	NA	NA	NA	NA	NA	C	C	C	T	C	C	T	T	C	T	T	T	T	T	T	Y	T	T	T	T	T	T	T	T	T	T	T	T	T	T	T	C	T	C	T	T	T	T	C
AX-108969356	G/T	1A	392362155	+	NA	NA	NA	NA	NA	NA	T	T	T	G	T	T	G	G	T	G	G	G	G	G	G	K	G	G	G	G	G	G	G	G	G	G	G	G	G	G	G	T	G	T	G	G	G	G	T
AX-109482870	C/T	1A	393075790	+	NA	NA	NA	NA	NA	NA	T	T	C	C	T	T	C	C	T	C	C	C	C	C	C	Y	C	C	C	C	C	C	C	C	C	C	C	C	C	C	C	T	C	T	C	C	C	C	T
AX-110582935	C/T	1A	393493089	+	NA	NA	NA	NA	NA	NA	T	T	C	C	T	T	C	C	T	C	C	C	C	C	C	Y	C	C	C	C	C	C	C	C	C	C	C	C	C	C	C	T	C	T	C	C	C	C	T
AX-109901400	G/T	1A	393533453	+	NA	NA	NA	NA	NA	NA	T	T	T	G	T	T	G	G	T	G	G	G	G	G	G	K	G	G	G	G	G	G	G	G	G	G	G	G	G	G	G	T	G	T	G	G	G	G	N
AX-109909392	T/G	1A	393630992	+	NA	NA	NA	NA	NA	NA	G	G	T	T	G	G	T	T	G	T	T	T	T	T	T	K	T	T	T	T	T	T	T	T	T	T	T	T	T	T	T	G	T	G	T	T	T	T	G
AX-94947927	T/C	1A	393637179	+	NA	NA	NA	NA	NA	NA	C	C	C	T	C	C	T	T	C	T	T	N	T	T	T	Y	T	T	T	T	T	T	T	T	T	T	T	T	T	T	T	C	T	C	T	T	T	T	C
AX-95629056	T/C	1A	393637179	+	NA	NA	NA	NA	NA	NA	C	C	C	T	C	C	T	T	C	T	T	T	T	Y	Y	Y	Y	T	Y	Y	T	Y	Y	Y	T	T	T	Y	T	T	Y	C	T	C	T	Y	T	T	C
AX-111512467	A/G	1A	393913701	+	NA	NA	NA	NA	NA	NA	G	G	A	A	G	G	A	A	G	A	A	A	A	A	A	R	A	A	A	A	A	A	A	A	A	A	A	A	A	A	A	G	A	G	A	A	A	A	G
AX-110070883	A/G	1A	393917632	+	NA	NA	NA	NA	NA	NA	G	G	A	A	G	G	A	A	G	A	A	N	A	A	A	R	A	A	A	A	A	A	A	A	A	N	A	A	A	A	A	G	A	G	A	A	A	A	G
AX-110923597	A/G	1A	393923390	+	NA	NA	NA	NA	NA	NA	G	G	A	A	G	G	A	A	G	A	A	A	A	A	A	R	A	A	A	A	A	A	A	A	A	A	A	A	A	A	A	G	A	G	A	A	A	A	G
AX-110380811	G/A	1A	393925540	+	NA	NA	NA	NA	NA	NA	A	A	G	G	A	A	G	G	A	G	G	N	G	G	G	R	G	G	G	G	G	G	G	G	G	G	G	G	G	G	G	A	G	A	G	G	G	G	A
AX-108846522	G/A	1A	393927384	+	NA	NA	NA	NA	NA	NA	A	A	G	G	A	A	G	G	A	G	G	G	G	G	G	R	G	G	G	G	G	G	G	G	G	G	G	G	G	G	G	A	G	A	G	G	G	G	A
AX-108819075	C/T	1A	394164274	+	NA	NA	NA	NA	NA	NA	T	T	C	C	T	T	C	C	T	C	C	C	C	C	C	Y	C	C	C	C	C	C	C	C	C	C	C	C	C	C	C	T	C	T	C	C	C	C	T
AX-111025953	C/T	1A	394166578	+	NA	NA	NA	NA	NA	NA	T	T	C	C	T	T	C	C	T	C	C	C	C	C	C	Y	C	C	C	C	C	C	C	C	C	C	C	C	C	C	C	T	C	T	C	C	C	C	T
AX-111449957	G/T	1A	394751091	+	NA	NA	NA	NA	NA	NA	T	T	G	G	T	T	G	G	T	G	G	G	G	G	G	K	G	G	G	G	G	G	K	G	G	G	G	G	G	G	G	T	G	T	G	G	G	G	T
AX-110483667	T/G	1A	395833636	+	NA	NA	NA	NA	NA	NA	G	G	G	T	G	G	T	G	G	T	T	K	T	T	T	K	T	T	T	T	T	T	T	T	T	T	T	T	G	T	T	T	T	T	T	T	T	T	T
AX-109277858	T/C	1A	396157049	+	NA	NA	NA	NA	NA	NA	C	C	C	T	C	C	T	C	C	T	T	Y	T	T	T	N	T	T	T	T	T	T	T	T	T	T	T	T	C	T	T	T	T	T	T	T	T	T	T
AX-111579616	C/G	1A	396354825	+	NA	NA	NA	NA	NA	NA	S	S	G	C	G	G	C	G	G	C	C	S	C	C	C	C	C	C	C	C	C	C	C	C	C	C	C	C	S	C	C	C	C	C	C	C	C	C	C
AX-111460876	A/G	1A	396497792	+	NA	NA	NA	NA	NA	NA	R	R	G	A	G	G	A	G	G	A	A	R	A	A	A	N	A	A	A	A	A	A	A	A	A	A	A	A	N	A	A	A	A	A	A	A	A	A	A
AX-109433788	A/G	1A	397193760	+	NA	NA	NA	NA	NA	NA	R	R	G	A	G	G	A	G	G	A	A	R	A	A	A	A	A	A	A	A	A	A	A	A	A	A	A	A	R	A	A	A	A	A	A	A	A	A	A
AX-94449890	A/G	1A	397219648	+	NA	NA	NA	NA	NA	NA	A	N	A	A	G	A	A	G	G	A	A	A	A	A	A	A	G	A	G	A	A	A	A	A	A	G	A	G	G	G	G	A	A	A	A	A	A	A	A
AX-108742536	T/C	1A	397420618	+	NA	NA	NA	NA	NA	NA	C	C	C	T	C	C	T	C	C	T	T	Y	T	T	T	Y	T	T	T	T	T	T	T	T	T	T	T	T	C	T	T	T	T	T	T	T	T	T	T
AX-109901624	C/T	1A	397527759	+	NA	NA	NA	NA	NA	NA	Y	Y	T	C	T	T	C	T	T	C	C	Y	C	C	C	C	C	C	C	C	C	C	C	C	C	C	C	C	Y	C	C	C	C	C	C	C	C	C	C
AX-110478714	G/A	1A	398222360	+	NA	NA	NA	NA	NA	NA	G	G	A	G	G	G	G	G	G	G	G	G	G	G	G	G	G	G	G	G	G	G	G	G	G	G	G	G	G	G	G	A	G	A	G	G	G	G	A
AX-109034686	A/G	1A	399262239	+	NA	NA	NA	NA	NA	NA	G	G	G	A	G	G	A	R	G	A	A	A	A	A	A	A	A	A	A	A	A	A	A	A	A	A	A	A	A	A	A	A	A	A	A	A	A	A	A
AX-109374169	G/A	1A	399707423	+	NA	NA	NA	NA	NA	NA	A	A	G	G	A	A	G	A	A	G	G	R	G	G	G	R	G	G	G	G	G	G	G	G	G	G	G	G	A	G	G	G	G	G	G	G	G	G	G
AX-109428393	C/A	1A	400805449	+	NA	NA	NA	NA	NA	NA	A	A	A	C	A	A	C	A	A	C	C	M	C	C	C	M	C	C	C	C	C	C	C	C	C	C	C	C	A	C	C	C	C	C	C	C	C	C	C
AX-111629150	C/T	1A	400841421	+	NA	NA	NA	NA	NA	NA	C	C	C	C	C	C	C	T	C	C	C	Y	C	C	C	Y	C	C	C	C	C	C	C	C	C	C	C	C	T	C	C	C	C	C	C	C	C	C	C
AX-179558615	T/C	1A	401016691	+	NA	NA	NA	NA	NA	NA	Y	Y	C	T	C	C	T	C	C	T	T	Y	T	T	T	T	T	T	T	T	T	T	T	T	T	T	T	T	Y	T	T	T	T	T	T	T	T	T	T
AX-95631019	T/C	1A	401016691	+	NA	NA	NA	NA	NA	NA	Y	Y	C	C	C	C	T	C	N	T	C	Y	C	T	T	Y	T	T	T	T	C	T	T	T	T	T	T	T	Y	C	T	T	C	T	C	T	C	C	T
AX-110026253	C/T	1A	401264768	+	NA	NA	NA	NA	NA	NA	Y	Y	T	C	T	T	C	T	T	C	C	Y	C	C	C	N	C	C	C	C	C	C	C	C	C	C	C	C	Y	C	C	C	C	C	C	C	C	C	C
AX-110068878	A/G	1A	401791223	+	NA	NA	NA	NA	NA	NA	R	R	G	A	G	G	A	G	G	A	A	R	N	A	A	A	A	A	A	A	A	A	A	A	A	A	A	A	R	A	A	A	A	A	A	A	A	A	A
AX-110048072	G/A	1A	401932602	+	NA	NA	NA	NA	NA	NA	A	A	A	G	A	A	R	A	A	R	N	N	N	R	R	R	R	R	G	R	G	R	R	R	R	R	R	R	A	G	R	R	G	R	G	R	G	G	R
AX-109842802	A/T	1A	401991127	+	NA	NA	NA	NA	NA	NA	W	W	T	A	T	T	A	T	T	A	A	W	A	A	A	A	A	A	A	A	A	A	A	A	A	A	A	A	W	A	A	A	A	A	A	A	A	A	A
AX-108934237	T/C	1A	402439399	+	NA	NA	NA	NA	NA	NA	Y	Y	C	T	C	C	T	C	C	T	T	Y	T	T	T	T	T	T	T	T	T	T	T	T	T	T	T	T	Y	T	T	T	T	T	T	T	T	T	T
AX-109972578	G/A	1A	402738815	+	NA	NA	NA	NA	NA	NA	A	A	A	G	A	A	G	A	A	G	G	R	G	G	G	R	G	G	G	G	G	G	G	G	G	G	G	G	A	G	G	G	G	G	G	G	G	G	G
AX-110394399	A/G	1A	402776969	+	NA	NA	NA	NA	NA	NA	G	G	G	A	G	G	A	G	G	A	A	R	A	A	A	R	G	A	G	A	A	A	A	A	A	A	G	G	G	G	G	A	A	A	A	G	A	A	A
AX-94417411	G/A	1A	402907845	+	NA	NA	NA	NA	NA	NA	A	A	A	G	A	A	G	A	A	G	G	R	G	G	G	R	G	G	G	G	G	G	G	G	G	G	G	G	A	G	G	G	G	G	G	G	G	G	G
AX-95176482	T/G	1A	402936851	+	NA	NA	NA	NA	NA	NA	G	G	G	T	G	G	T	G	G	T	T	K	T	T	T	T	T	T	T	T	T	T	T	T	T	T	T	T	K	T	T	T	T	T	T	T	T	T	T
AX-86164029	T/C	1A	402988444	+	NA	NA	NA	NA	NA	NA	Y	Y	C	T	C	C	T	C	C	T	T	C	T	T	T	N	Y	T	Y	T	T	T	Y	T	T	C	T	Y	Y	C	Y	T	T	T	T	T	T	T	T
AX-94526905	A/G	1A	403265458	+	NA	NA	NA	NA	NA	NA	R	R	G	A	G	R	A	G	G	A	A	G	A	A	A	R	R	A	R	A	A	A	R	A	A	N	A	R	R	G	R	A	A	A	A	A	A	A	A
AX-110408382	C/G	1A	403267578	+	NA	NA	NA	NA	NA	NA	S	S	G	C	G	G	C	G	G	C	C	S	C	C	C	C	C	C	C	C	C	C	C	C	C	C	C	C	S	C	C	C	C	C	C	C	C	C	C
AX-94489119	G/A	1A	403606245	+	NA	NA	NA	NA	NA	NA	R	R	A	G	A	A	G	A	A	G	G	A	G	G	G	G	G	G	G	G	G	G	G	G	G	G	G	G	R	G	G	G	G	G	G	G	G	G	G
AX-94466632	C/A	1A	411731662	+	NA	NA	NA	NA	NA	NA	C	C	C	C	C	C	C	A	C	C	C	N	C	C	C	C	M	C	M	C	C	C	C	C	C	C	A	M	M	A	M	C	C	C	C	M	N	C	C
AX-110744088	T/G	1A	432192970	+	NA	NA	NA	NA	NA	NA	K	K	G	T	G	G	T	G	G	T	T	G	T	T	T	T	K	T	K	T	T	T	T	T	T	T	G	K	K	G	K	G	T	K	T	K	T	T	K
AX-95109512	A/C	1A	436255106	+	NA	NA	NA	NA	NA	NA	C	A	C	C	A	A	C	A	A	A	A	A	A	C	C	A	C	M	A	A	A	C	A	A	C	C	A	C	A	C	C	A	C	C	A	A	A	A	C
AX-110391018	T/C	1A	437717921	+	NA	NA	NA	NA	NA	NA	Y	Y	C	T	C	C	T	C	C	T	T	C	T	T	T	T	Y	T	Y	T	T	T	T	T	T	T	C	Y	Y	C	Y	C	T	Y	T	Y	T	T	Y
AX-179560753	A/G	1A	441386749	+	NA	NA	NA	NA	NA	NA	A	A	A	A	A	A	A	A	A	A	A	R	A	A	A	A	A	A	G	A	A	A	A	A	A	A	G	A	G	A	A	A	A	A	A	G	A	A	A
AX-86172430	T/C	1A	441387329	+	NA	NA	NA	NA	NA	NA	T	T	T	T	T	T	T	T	T	T	T	Y	T	T	T	T	T	T	Y	T	T	T	T	T	T	T	C	T	Y	T	T	T	T	T	T	Y	T	T	T
AX-94608897	G/C	1A	442640638	+	NA	NA	NA	NA	NA	NA	S	S	C	G	C	C	G	C	C	N	G	S	G	G	G	G	S	G	S	G	G	G	G	G	G	G	C	S	S	C	S	G	G	G	G	S	G	G	G
AX-95072845	G/A	1A	442642752	+	NA	NA	NA	NA	NA	NA	G	R	R	G	N	R	G	N	R	G	G	A	G	G	G	G	R	G	R	G	G	G	G	G	G	G	A	R	R	R	R	G	G	G	G	R	G	G	G
AX-94451045	T/C	1A	442822126	+	NA	NA	NA	NA	NA	NA	Y	Y	C	T	C	C	T	C	C	T	T	Y	T	T	T	T	Y	T	Y	T	T	T	T	T	T	T	C	Y	Y	C	Y	T	T	T	T	Y	T	T	T
AX-109368048	T/G	1A	445764943	+	NA	NA	NA	NA	NA	NA	G	G	G	T	G	G	T	G	G	T	T	K	T	T	T	T	G	T	G	T	T	T	T	T	T	T	G	G	N	G	G	T	T	T	T	G	T	T	T
AX-108877137	C/T	1A	446440703	+	NA	NA	NA	NA	NA	NA	Y	Y	T	C	N	T	C	N	T	C	C	Y	C	C	C	C	Y	C	Y	C	C	C	C	C	C	C	T	Y	Y	T	Y	C	C	C	C	Y	C	C	C
AX-179561138	G/A	1A	446443287	+	NA	NA	NA	NA	NA	NA	A	A	A	G	A	R	G	A	A	R	G	R	G	G	G	G	A	R	A	R	G	R	G	G	R	G	A	A	A	A	A	G	G	G	G	A	R	G	G
AX-95628851	G/A	1A	446443287	+	NA	NA	NA	NA	NA	NA	A	R	A	G	A	A	G	A	A	N	G	N	G	G	G	G	A	G	A	R	G	R	G	G	R	G	A	N	A	A	A	G	G	G	G	A	R	G	G
AX-95633485	G/A	1A	446444116	+	NA	NA	NA	NA	NA	NA	G	G	G	G	G	G	G	G	G	G	G	R	G	G	G	G	R	G	R	G	G	G	G	G	G	G	A	R	R	A	R	G	G	G	G	R	G	G	G
AX-111020377	A/G	1A	447500675	+	NA	NA	NA	NA	NA	NA	G	G	G	A	G	G	A	G	G	A	A	R	A	A	A	A	G	A	G	A	A	A	A	A	A	A	G	G	G	G	G	A	A	A	A	G	A	A	A
AX-111086674	T/C	1A	447532091	+	NA	NA	NA	NA	NA	NA	C	C	C	T	C	C	T	C	C	T	T	Y	T	T	T	T	N	T	C	T	T	T	T	T	T	T	C	C	C	C	C	T	T	T	T	C	T	T	T
AX-108968041	A/G	1A	447586785	+	NA	NA	NA	NA	NA	NA	G	G	G	A	G	G	A	G	G	A	A	R	A	A	A	A	R	A	G	A	A	A	A	A	A	A	G	R	G	G	G	A	A	A	A	G	A	A	A
AX-86173886	A/G	1A	449395808	+	NA	NA	NA	NA	NA	NA	G	G	G	A	G	G	A	G	G	A	A	R	A	A	A	A	G	A	G	A	A	A	A	A	A	A	G	G	G	G	G	A	A	A	A	G	A	A	A
AX-86173887	A/G	1A	449395808	+	NA	NA	NA	NA	NA	NA	R	R	G	A	G	G	A	G	G	A	A	R	A	A	A	A	R	A	R	A	A	A	A	A	A	N	G	R	R	G	R	A	A	A	A	R	A	A	A
AX-94505885	A/G	1A	458241950	+	NA	NA	NA	NA	NA	NA	G	G	A	G	G	G	G	G	G	A	A	A	A	G	G	A	G	A	G	A	A	G	A	A	G	A	A	G	G	G	G	A	G	G	A	A	A	G	G
AX-95631820	A/G	1A	458241950	+	NA	NA	NA	NA	NA	NA	G	G	A	G	G	G	G	G	G	A	A	A	A	G	G	A	G	A	G	A	A	G	A	A	G	A	A	G	G	G	G	A	G	G	A	A	A	G	G
AX-110089093	T/C	1A	468538391	+	NA	NA	NA	NA	NA	NA	T	T	T	T	T	T	T	T	T	T	T	T	T	T	T	T	T	T	T	T	T	T	T	T	T	T	T	T	T	T	T	C	T	C	T	T	T	T	C
AX-109083638	A/G	1A	470765228	+	NA	NA	NA	NA	NA	NA	A	G	G	A	G	A	A	G	G	A	A	R	A	A	A	R	A	A	G	G	A	A	A	A	A	A	G	A	G	A	A	G	A	G	A	G	A	A	G
AX-86173442	T/C	1A	470797202	+	NA	NA	NA	NA	NA	NA	T	C	T	T	C	T	T	C	C	T	T	T	T	T	T	T	T	T	T	C	T	T	T	T	T	T	T	T	T	T	T	C	T	C	T	C	T	T	C
AX-86173443	T/C	1A	470797202	+	NA	NA	NA	NA	NA	NA	T	C	T	T	C	T	T	C	C	T	T	T	T	T	T	T	T	T	T	C	T	T	T	T	T	T	T	T	T	T	T	C	T	C	T	C	T	T	C
AX-110963850	A/C	1A	471071330	+	NA	NA	NA	NA	NA	NA	A	C	A	A	C	A	A	C	C	A	A	N	A	A	A	A	A	A	A	C	A	A	A	A	A	A	A	A	A	A	A	C	A	C	A	C	A	A	C
AX-110976368	C/G	1A	471137714	+	NA	NA	NA	NA	NA	NA	C	G	G	C	G	C	C	G	G	C	C	G	C	C	C	S	C	C	G	G	C	C	C	C	C	C	G	C	G	C	C	G	C	G	C	G	C	C	G
AX-94542559	A/G	1A	471441890	+	NA	NA	NA	NA	NA	NA	R	R	G	A	G	G	A	G	G	G	A	A	A	A	A	A	R	G	A	A	A	R	A	R	G	G	A	R	A	G	R	A	G	A	A	A	G	A	A
AX-110967537	T/C	1A	471697724	+	NA	NA	NA	NA	NA	NA	Y	Y	C	T	C	C	T	C	C	T	T	T	T	T	T	T	Y	T	T	T	T	T	T	T	T	T	T	Y	T	C	Y	T	T	T	T	T	T	T	T
AX-94478919	C/A	1A	472360971	+	NA	NA	NA	NA	NA	NA	M	C	A	C	C	A	C	C	C	C	C	C	C	C	C	C	M	C	C	M	C	C	C	C	N	C	C	M	C	A	M	C	C	C	C	M	C	C	C
AX-86173157	A/G	1A	472648238	+	NA	NA	NA	NA	NA	NA	A	A	A	A	A	A	A	A	A	A	A	A	A	A	A	A	G	A	A	G	A	A	A	A	A	A	A	G	A	G	G	A	A	A	A	G	A	A	A
AX-94600055	C/T	1A	473190495	+	NA	NA	NA	NA	NA	NA	C	C	C	C	C	C	C	C	C	C	C	C	C	C	C	C	T	C	C	T	C	C	C	C	C	C	C	T	C	T	T	C	C	C	C	T	C	C	C
AX-94633266	T/G	1A	473233690	+	NA	NA	NA	NA	NA	NA	G	G	T	T	G	G	T	G	G	T	T	G	T	T	T	G	G	T	G	T	T	T	G	T	T	G	T	G	G	G	G	T	T	T	T	T	T	T	T
AX-111466991	C/G	1A	473238339	+	NA	NA	NA	NA	NA	NA	G	G	G	C	G	G	C	G	G	C	C	C	C	C	C	C	G	C	C	C	C	C	C	C	C	C	C	N	C	G	G	C	C	C	C	C	C	C	C
AX-86172575	T/C	1A	480449109	+	NA	NA	NA	NA	NA	NA	T	T	T	T	T	T	T	T	T	T	T	T	T	T	T	T	T	T	T	Y	T	T	T	T	T	T	C	T	T	T	T	T	T	T	T	Y	T	T	T
AX-86172576	T/C	1A	480449109	+	NA	NA	NA	NA	NA	NA	T	T	T	T	T	T	T	T	T	T	T	T	T	T	T	Y	T	T	T	C	T	T	T	T	T	T	C	T	T	T	T	T	T	T	T	C	T	T	T
AX-109844206	A/G	1A	481310614	+	NA	NA	NA	NA	NA	NA	R	R	G	A	G	G	A	G	G	A	A	A	A	A	A	N	R	A	A	R	A	A	R	A	A	A	G	R	A	G	R	A	A	A	A	R	A	A	A
AX-111082947	A/G	1A	482036137	+	NA	NA	NA	NA	NA	NA	G	G	G	A	G	G	A	G	G	A	A	A	A	A	A	N	G	A	A	G	A	A	A	A	A	A	G	G	A	G	G	A	A	A	A	G	A	A	A
AX-89672347	G/A	1A	482504405	+	NA	NA	NA	NA	NA	NA	A	A	G	G	A	A	G	A	A	A	G	G	G	G	G	G	A	A	G	G	G	A	G	A	A	G	G	A	A	A	A	G	A	G	G	G	A	G	G
AX-95102105	A/G	1A	482867863	+	NA	NA	NA	NA	NA	NA	R	R	G	R	R	G	G	R	G	R	R	G	R	R	R	R	R	R	R	R	R	A	R	A	R	G	G	R	G	R	R	G	A	R	R	G	A	R	R
AX-94768074	C/G	1A	482998044	+	NA	NA	NA	NA	NA	NA	C	C	G	G	C	C	G	C	S	C	G	G	G	S	S	S	C	C	S	C	G	C	S	C	C	G	G	C	C	C	C	G	C	S	G	C	C	G	S
AX-111543794	C/T	1A	485413091	+	NA	NA	NA	NA	NA	NA	C	C	T	C	C	C	C	C	C	C	C	C	C	C	C	C	T	C	C	T	C	C	C	C	C	C	T	T	T	T	T	C	C	C	C	T	C	C	C
AX-86163134	A/C	1A	485440935	+	NA	NA	NA	NA	NA	NA	A	A	C	A	A	A	A	A	A	A	A	A	A	A	A	A	M	A	A	M	A	A	A	A	A	A	C	M	M	C	M	A	A	A	A	M	A	A	A
AX-86175827	G/T	1A	485876511	+	NA	NA	NA	NA	NA	NA	G	G	T	G	G	G	G	G	G	G	G	G	G	G	G	G	T	G	G	T	G	G	G	G	G	G	T	T	T	T	T	G	G	G	G	T	G	G	G
AX-86175828	G/T	1A	485876511	+	NA	NA	NA	NA	NA	NA	G	G	T	G	G	G	G	G	G	G	G	G	G	G	G	G	T	G	G	T	G	G	G	G	G	G	T	T	T	T	T	G	G	G	G	T	G	G	G
AX-110490481	G/A	1A	485964452	+	NA	NA	NA	NA	NA	NA	G	G	A	G	G	G	G	G	G	G	G	G	G	G	G	G	A	G	G	A	G	G	G	G	G	G	A	A	A	A	A	G	G	G	G	A	G	G	G
AX-109932328	T/C	1A	485966038	+	NA	NA	NA	NA	NA	NA	T	T	C	T	T	T	T	T	T	N	T	T	T	T	T	T	Y	C	T	Y	T	Y	T	Y	C	T	C	Y	Y	C	Y	N	C	T	T	Y	C	T	T
AX-109842766	T/C	1A	485972900	+	NA	NA	NA	NA	NA	NA	T	N	C	T	T	T	T	T	T	C	T	T	T	T	T	T	C	C	T	C	T	C	T	C	C	T	C	C	C	C	C	T	C	T	T	C	C	T	T
AX-108870453	T/C	1A	486583473	+	NA	NA	NA	NA	NA	NA	T	T	T	C	T	T	C	C	Y	T	C	C	C	C	C	C	T	T	C	T	C	T	C	T	T	C	T	T	T	T	T	C	T	C	C	T	T	C	C
AX-111477775	G/A	1A	486584732	+	NA	NA	NA	NA	NA	NA	A	A	G	G	R	A	G	G	A	G	G	G	G	R	R	R	R	G	R	R	G	R	R	R	G	G	G	R	R	G	R	G	G	R	G	R	G	G	R
AX-111034441	C/T	1A	486600406	+	NA	NA	NA	NA	NA	NA	T	T	C	C	T	T	C	C	Y	C	C	C	C	C	C	C	C	C	C	C	C	C	C	C	C	C	N	C	Y	C	C	C	C	C	C	C	C	C	C
AX-110616388	T/C	1A	487772068	+	NA	NA	NA	NA	NA	NA	C	C	T	T	C	C	T	T	Y	T	T	T	T	T	T	T	T	T	T	T	T	T	T	T	T	T	T	T	T	T	T	T	T	T	T	T	T	T	T
AX-110628393	C/G	1A	488636004	+	NA	NA	NA	NA	NA	NA	C	C	C	C	C	C	C	C	C	C	C	C	C	C	C	C	S	C	C	S	C	C	C	C	C	C	C	S	C	G	S	C	C	C	C	S	C	C	C
AX-94947812	G/A	1A	488757816	+	NA	NA	NA	NA	NA	NA	G	G	G	G	G	G	G	G	G	G	G	G	G	G	G	G	G	G	G	G	A	G	G	R	G	G	G	G	G	G	G	A	G	G	A	R	G	G	G
AX-111493911	A/G	1A	488774994	+	NA	NA	NA	NA	NA	NA	A	A	G	A	A	A	A	A	A	G	A	A	A	A	A	A	G	G	A	G	A	G	A	G	G	A	G	G	N	G	G	A	G	A	A	G	G	A	A
AX-111211046	G/A	1A	488817556	+	NA	NA	NA	NA	NA	NA	A	A	G	G	A	A	G	G	N	G	G	G	G	R	G	G	G	G	G	G	G	G	G	G	G	G	G	G	G	G	G	G	G	G	G	G	G	G	G
AX-94889305	A/C	1A	488942450	+	NA	NA	NA	NA	NA	NA	A	A	A	A	A	A	A	A	A	C	A	A	A	A	A	A	A	C	A	A	A	M	A	M	C	A	C	A	M	A	A	A	C	A	A	A	C	A	A
AX-179557743	C/T	1A	488942798	+	NA	NA	NA	NA	NA	NA	C	C	C	C	C	C	C	C	C	T	C	C	C	Y	Y	Y	C	T	Y	C	C	T	N	T	T	C	T	C	T	C	C	C	T	Y	C	C	T	C	Y
AX-95188865	C/T	1A	488942798	+	NA	NA	NA	NA	NA	NA	C	C	C	C	C	C	C	C	C	T	C	C	C	C	C	C	C	T	C	C	C	Y	C	Y	T	C	T	C	Y	C	C	C	T	C	C	C	T	C	C
AX-112290238	C/A	1A	488942818	+	NA	NA	NA	NA	NA	NA	A	A	A	C	A	A	C	C	N	M	C	C	C	C	C	C	A	M	C	A	C	N	C	N	M	C	M	A	N	A	A	C	M	C	C	A	M	C	C
AX-95630287	A/C	1A	488942818	+	NA	NA	NA	NA	NA	NA	A	A	A	C	A	A	C	C	M	A	C	C	C	C	C	C	A	A	C	A	C	A	C	A	A	C	A	A	A	A	N	C	A	C	C	A	A	C	C
AX-109538739	G/A	1A	489017250	+	NA	NA	NA	NA	NA	NA	A	A	A	G	A	A	G	G	R	G	G	G	G	G	G	G	A	G	G	A	G	G	G	G	G	G	G	A	G	A	A	G	G	G	G	A	G	G	G
AX-86180120	A/G	1A	489017974	+	NA	NA	NA	NA	NA	NA	A	A	A	G	A	A	G	G	N	N	G	G	G	R	R	R	A	A	R	A	G	A	R	A	A	G	A	A	A	A	A	G	A	R	G	A	A	G	R
AX-86180121	A/G	1A	489017974	+	NA	NA	NA	NA	NA	NA	A	A	A	G	A	A	A	G	A	A	G	A	N	R	R	R	N	A	R	A	G	A	R	A	A	A	A	A	A	A	A	A	A	R	G	A	A	G	R
AX-109823133	C/A	1A	489830052	+	NA	NA	NA	NA	NA	NA	N	A	A	C	A	N	C	C	C	C	C	C	C	C	C	C	A	C	C	A	C	C	C	C	C	C	C	A	C	A	A	C	C	C	C	A	C	C	C
AX-179558592	G/A	1A	489847917	+	NA	NA	NA	NA	NA	NA	A	A	G	G	A	A	A	A	A	A	G	A	G	R	R	N	R	A	R	R	G	R	A	R	G	A	A	R	R	G	R	A	G	R	G	R	G	G	R
AX-95682410	G/A	1A	489847917	+	NA	NA	NA	NA	NA	NA	A	A	G	G	A	A	G	A	R	G	G	G	G	G	G	R	G	G	G	G	G	G	G	G	G	G	G	G	G	G	G	G	G	G	G	G	G	G	G
AX-95069018	G/A	1A	489848709	+	NA	NA	NA	NA	NA	NA	A	A	A	G	A	A	G	A	N	G	G	G	G	R	R	R	A	G	R	A	G	R	R	R	G	G	G	A	R	A	A	G	G	R	G	A	G	G	R
AX-110546208	T/C	1A	489867966	+	NA	NA	NA	NA	NA	NA	C	C	T	T	C	C	T	C	Y	T	T	T	T	T	T	Y	T	T	T	T	T	T	T	T	T	T	T	T	T	T	T	T	T	T	T	T	T	T	T
AX-89736240	C/T	1A	489869171	+	NA	NA	NA	NA	NA	NA	C	C	T	C	C	C	C	C	C	C	C	C	C	C	C	C	Y	C	C	Y	C	C	C	C	C	C	C	Y	C	T	Y	C	C	C	C	Y	C	C	C
AX-89553661	A/G	1A	489945679	+	NA	NA	NA	NA	NA	NA	G	G	A	G	G	G	G	A	A	A	G	G	G	G	G	R	A	A	G	A	G	A	G	A	A	A	A	A	A	A	A	G	A	G	G	A	A	G	G
AX-108893431	G/A	1A	490409976	+	NA	NA	NA	NA	NA	NA	G	G	A	R	G	G	A	R	R	G	R	A	R	A	A	A	A	G	A	A	R	G	A	G	G	G	G	A	G	R	A	A	G	A	R	A	G	R	A
AX-94392849	G/T	1A	490466960	+	NA	NA	NA	NA	NA	NA	K	K	G	G	K	T	G	G	G	T	G	G	G	G	G	G	G	T	G	G	G	K	G	K	T	T	T	G	T	G	G	G	K	G	G	G	K	G	G
AX-95631047	G/T	1A	490466960	+	NA	NA	NA	NA	NA	NA	K	K	G	G	T	N	G	G	K	T	G	G	G	G	G	G	G	T	G	G	G	K	G	K	T	T	T	G	K	G	G	G	T	G	G	G	T	G	G
AX-94834373	C/T	1A	490910588	+	NA	NA	NA	NA	NA	NA	C	C	C	C	C	C	C	Y	Y	C	C	C	C	C	C	Y	Y	C	C	Y	C	C	C	C	C	C	C	Y	C	Y	Y	C	C	C	C	Y	C	C	C
AX-95630619	C/T	1A	490910588	+	NA	NA	NA	NA	NA	NA	C	C	C	C	C	C	C	Y	Y	C	C	C	C	C	C	Y	T	C	C	T	C	C	Y	C	C	C	C	N	C	Y	T	C	C	C	C	T	C	C	C
AX-179476256	C/T	1A	490920354	+	NA	NA	NA	NA	NA	NA	T	T	T	C	T	T	C	T	T	N	C	C	C	C	C	Y	T	N	C	T	C	Y	C	Y	T	N	N	T	N	T	T	C	N	C	C	T	N	C	C
AX-94770579	T/C	1A	490920354	+	NA	NA	NA	NA	NA	NA	T	T	T	C	T	T	C	T	T	T	C	C	C	Y	Y	Y	T	T	Y	T	C	T	Y	T	T	T	T	T	T	T	T	C	T	Y	C	T	T	C	Y
AX-111634870	G/A	1A	490930325	+	NA	NA	NA	NA	NA	NA	G	G	G	G	G	G	G	A	A	G	G	G	G	G	G	N	R	G	G	R	G	G	G	G	G	G	G	R	G	N	R	G	G	G	G	R	G	G	G
AX-112289517	G/A	1A	490930325	+	NA	NA	NA	NA	NA	NA	N	N	G	G	G	G	G	A	R	G	G	G	G	N	N	R	N	G	N	A	G	R	N	N	G	G	G	N	R	N	N	G	G	R	G	A	G	G	N
AX-108949130	C/G	1A	490933401	+	NA	NA	NA	NA	NA	NA	G	G	C	G	G	G	G	C	C	C	G	G	G	G	G	S	C	C	G	C	G	C	G	C	C	C	C	C	C	C	C	G	C	G	G	C	C	G	G
AX-179560511	T/G	1A	491138353	+	NA	NA	NA	NA	NA	NA	T	T	G	T	T	T	T	T	T	T	T	T	T	T	T	T	G	T	T	G	T	T	T	T	T	T	T	G	T	G	G	T	T	T	T	G	T	T	T
AX-94519923	T/G	1A	491138353	+	NA	NA	NA	NA	NA	NA	T	T	G	T	T	T	T	T	T	T	T	T	T	T	T	T	G	T	T	G	T	T	K	T	T	T	T	N	T	G	G	T	T	T	T	G	T	T	K
AX-109932303	C/T	1A	491374541	+	NA	NA	NA	NA	NA	NA	C	C	C	C	C	C	C	C	C	C	C	C	C	C	C	C	Y	C	C	Y	C	C	C	C	C	C	C	Y	C	T	Y	C	C	C	C	Y	C	C	C
AX-111491668	A/G	1A	491374949	+	NA	NA	NA	NA	NA	NA	G	G	G	A	G	G	A	G	R	A	A	A	A	A	A	R	A	A	A	A	A	A	A	A	A	A	A	A	A	A	A	A	A	A	A	A	A	A	A
AX-94507352	T/A	1A	491751640	+	NA	NA	NA	NA	NA	NA	T	T	T	A	T	T	A	T	T	T	A	A	A	A	A	W	T	T	A	T	A	T	A	T	T	T	T	T	T	T	T	A	T	A	A	T	T	A	A
AX-179560049	A/G	1A	492375601	+	NA	NA	NA	NA	NA	NA	A	A	A	A	A	A	A	A	A	A	A	A	A	A	A	A	G	A	A	G	A	A	A	A	A	A	A	G	A	G	G	A	A	A	A	G	A	A	N
AX-95652044	C/T	1A	492375832	+	NA	NA	NA	NA	NA	NA	T	T	C	C	T	T	C	C	C	C	C	C	C	C	C	C	T	C	C	T	C	C	C	C	C	C	T	T	T	T	T	C	C	C	C	T	C	C	C
AX-109993903	T/C	1A	493013252	+	NA	NA	NA	NA	NA	NA	C	C	C	T	C	C	T	C	Y	T	T	T	T	Y	Y	Y	C	T	Y	C	T	Y	Y	Y	T	T	C	C	C	C	C	T	T	Y	T	C	T	T	Y
AX-110057220	T/C	1A	493036292	+	NA	NA	NA	NA	NA	NA	T	T	C	T	T	T	T	C	Y	T	T	T	T	T	T	Y	C	T	T	C	T	T	T	T	T	T	T	C	T	C	C	T	T	T	T	C	T	T	T
AX-108917420	G/A	1A	493207330	+	NA	NA	NA	NA	NA	NA	G	G	G	A	G	G	A	G	G	G	A	A	A	A	A	R	G	G	A	G	A	G	A	G	G	G	G	G	G	G	G	A	G	A	A	G	G	A	A
AX-86174988	G/A	1A	493378761	+	NA	NA	NA	NA	NA	NA	G	G	G	A	G	G	A	G	G	G	A	A	A	R	R	R	G	G	R	G	A	G	R	G	G	G	G	G	G	G	G	A	G	R	A	G	G	A	R
AX-86174989	G/A	1A	493378761	+	NA	NA	NA	NA	NA	NA	G	G	G	A	G	G	A	G	G	G	A	A	A	A	A	R	G	G	A	G	A	G	A	G	G	G	G	G	G	G	G	A	G	A	A	G	G	A	A
AX-95684470	C/A	1A	493378849	+	NA	NA	NA	NA	NA	NA	C	C	C	C	C	C	C	C	C	C	C	C	C	N	C	C	A	C	C	A	C	C	C	C	C	C	C	A	C	A	A	C	C	C	C	A	C	C	C
AX-108831315	C/T	1A	493385005	+	NA	NA	NA	NA	NA	NA	C	C	C	T	C	C	T	C	C	C	T	T	T	T	T	Y	C	C	T	C	T	C	T	C	C	C	C	C	C	C	C	T	C	T	T	C	C	T	T
AX-109485282	G/A	1A	493385625	+	NA	NA	NA	NA	NA	NA	N	G	G	G	G	G	G	G	G	G	G	G	G	G	G	N	A	G	G	A	G	G	N	G	G	G	A	A	A	A	A	G	G	G	G	A	G	G	G
AX-109519398	G/A	1A	493393442	+	NA	NA	NA	NA	NA	NA	G	G	G	G	G	G	G	G	G	G	G	G	G	G	G	G	A	G	G	A	G	G	G	G	G	G	G	A	G	A	A	G	G	G	G	A	G	G	G
AX-111091197	T/G	1A	493570199	+	NA	NA	NA	NA	NA	NA	T	T	T	G	T	T	G	T	T	T	G	G	G	G	G	K	T	T	G	T	G	T	G	T	T	T	T	T	T	T	T	G	T	G	G	T	T	G	G
AX-111031072	G/T	1A	494055196	+	NA	NA	NA	NA	NA	NA	G	G	G	T	G	G	T	G	G	G	T	T	T	T	T	K	G	G	T	G	T	G	T	G	G	G	G	G	G	G	G	T	G	T	T	G	G	T	T
AX-178059203	T/C	1A	494071611	+	NA	NA	NA	NA	NA	NA	T	T	T	T	T	T	T	T	T	T	T	T	T	T	T	T	Y	T	T	Y	T	T	T	T	T	T	T	Y	T	N	Y	T	T	T	T	Y	T	T	T
AX-95681553	T/C	1A	494071611	+	NA	NA	NA	NA	NA	NA	T	T	T	T	T	T	T	T	T	T	T	T	T	T	T	T	C	T	T	C	T	T	T	T	T	T	T	C	T	Y	C	T	T	T	T	C	T	T	T
AX-110070785	G/A	1A	494072125	+	NA	NA	NA	NA	NA	NA	G	G	G	G	G	G	G	G	G	G	G	G	G	G	G	G	R	G	G	R	G	G	G	G	G	G	G	R	G	A	R	G	G	G	G	R	G	G	G
AX-111696178	T/C	1A	494608436	+	NA	NA	NA	NA	NA	NA	Y	Y	C	T	T	T	T	C	Y	T	T	T	T	Y	Y	Y	C	T	Y	C	T	Y	Y	Y	T	T	C	C	C	C	C	T	T	Y	T	C	T	T	Y
AX-111104121	C/T	1A	494731077	+	NA	NA	NA	NA	NA	NA	C	C	C	C	C	C	C	C	C	C	C	C	C	C	C	C	T	C	C	T	C	C	C	C	C	C	C	T	C	N	T	C	C	C	C	T	C	C	C
AX-110545671	A/G	1A	494732890	+	NA	NA	NA	NA	NA	NA	A	A	G	A	A	A	A	G	R	A	A	A	A	A	A	R	G	A	A	G	A	A	A	A	A	A	G	G	G	G	G	A	A	A	A	G	A	A	A
AX-109815371	T/A	1A	494818883	+	NA	NA	NA	NA	NA	NA	T	T	T	A	T	T	A	T	T	T	A	A	A	A	A	W	T	T	A	T	A	T	A	T	T	T	T	T	T	T	T	A	T	A	A	T	T	A	A
AX-110507721	A/G	1A	494971785	+	NA	NA	NA	NA	NA	NA	A	A	A	A	A	A	A	A	A	A	A	A	A	A	A	A	G	A	A	G	A	A	A	A	A	A	A	G	A	G	G	A	A	A	A	G	A	A	A
AX-110513818	C/G	1A	494982624	+	NA	NA	NA	NA	NA	NA	C	C	G	C	C	C	C	G	S	C	C	C	C	C	C	S	G	C	C	G	C	C	C	C	C	C	G	G	G	G	G	C	C	C	C	G	C	C	C
AX-108978389	G/A	1A	494983673	+	NA	NA	NA	NA	NA	NA	G	R	A	G	G	G	G	A	R	G	G	G	G	G	G	R	A	G	G	A	G	N	G	G	G	G	A	A	A	A	A	G	G	G	G	A	G	G	G
AX-111484910	C/A	1A	495000628	+	NA	NA	NA	NA	NA	NA	C	C	C	C	C	C	C	C	C	C	C	C	C	C	C	C	A	C	C	A	C	C	C	C	C	C	C	A	C	A	A	C	C	C	C	A	C	C	C
AX-94757176	C/T	1A	495038253	+	NA	NA	NA	NA	NA	NA	Y	Y	C	C	C	C	C	C	C	C	C	C	C	Y	Y	Y	T	C	Y	T	C	Y	Y	Y	C	C	C	T	Y	T	T	C	C	Y	C	T	C	C	Y
AX-109944937	G/A	1A	495082426	+	NA	NA	NA	NA	NA	NA	G	G	G	G	G	G	G	G	G	G	G	G	G	G	G	G	A	G	G	A	G	G	G	G	G	G	G	A	G	A	A	G	G	G	G	A	G	G	G
AX-95629446	A/G	1A	495136226	+	NA	NA	NA	NA	NA	NA	A	A	G	A	A	A	A	G	R	A	A	A	A	A	A	R	G	A	A	G	A	A	N	A	A	A	G	G	G	G	G	A	A	A	A	G	A	A	A
AX-111537555	G/A	1A	495323786	+	NA	NA	NA	NA	NA	NA	G	G	A	G	G	G	G	A	R	G	G	G	G	G	G	R	A	G	G	A	G	G	G	G	G	G	A	A	A	A	A	G	G	G	G	A	G	G	G
AX-111127994	C/T	1A	495539163	+	NA	NA	NA	NA	NA	NA	C	C	C	T	C	C	T	C	C	C	T	T	T	T	T	Y	C	C	T	C	T	C	N	C	C	C	C	C	C	C	C	T	C	T	T	C	C	T	T
AX-109831764	C/G	1A	495772957	+	NA	NA	NA	NA	NA	NA	C	C	C	G	C	C	G	C	C	C	G	G	G	G	G	S	C	C	G	C	G	C	G	C	C	C	C	C	C	C	C	G	C	G	G	C	C	G	G
AX-94839686	C/T	1A	495779783	+	NA	NA	NA	NA	NA	NA	Y	Y	T	C	C	C	C	T	T	C	C	C	C	Y	Y	N	T	C	Y	T	C	Y	Y	Y	C	C	T	T	T	T	T	C	C	Y	C	T	C	C	Y
AX-110088114	C/T	1A	495787886	+	NA	NA	NA	NA	NA	NA	C	N	C	C	C	C	C	C	C	C	C	C	C	C	C	C	T	C	C	T	C	C	C	C	C	C	C	N	C	T	T	C	C	C	C	T	C	C	C
AX-110949025	G/T	1A	496105139	+	NA	NA	NA	NA	NA	NA	G	G	G	T	G	G	T	G	G	G	T	T	T	T	T	K	G	G	T	G	T	G	T	G	G	G	G	G	G	G	G	T	G	T	T	G	G	T	T
AX-109502948	C/T	1A	496134018	+	NA	NA	NA	NA	NA	NA	C	C	C	C	C	C	C	C	C	C	C	C	C	C	C	C	T	C	C	T	C	C	C	C	C	C	C	T	C	T	T	C	C	C	C	T	C	C	C
AX-108847117	A/G	1A	496139172	+	NA	NA	NA	NA	NA	NA	A	R	G	A	A	A	A	G	R	A	A	A	A	A	A	N	G	A	A	G	A	A	A	A	A	A	A	G	A	G	G	A	A	A	A	G	A	A	A
AX-89472485	A/G	1A	496144789	+	NA	NA	NA	NA	NA	NA	A	A	G	A	A	A	A	G	R	A	A	A	A	A	A	R	G	A	A	G	A	A	A	A	A	A	A	G	A	G	G	A	A	N	A	G	A	A	A
AX-110364737	G/A	1A	496234900	+	NA	NA	NA	NA	NA	NA	G	G	A	G	G	G	G	A	R	G	G	G	G	G	G	R	A	G	G	A	G	G	G	G	G	G	A	A	A	A	A	G	G	G	G	A	G	G	G
AX-109841429	A/G	1A	497299431	+	NA	NA	NA	NA	NA	NA	A	A	G	G	A	A	G	N	N	A	G	A	G	G	G	R	G	A	N	A	G	A	R	A	A	A	G	G	G	G	G	A	A	A	G	A	A	G	A
AX-108895514	T/C	1A	497310894	+	NA	NA	NA	NA	NA	NA	T	T	T	C	T	T	C	T	T	T	C	T	C	C	C	Y	C	T	T	T	C	T	T	T	T	T	C	C	C	C	C	T	T	T	C	T	T	C	T
AX-109947456	T/C	1A	497438903	+	NA	NA	NA	NA	NA	NA	T	T	T	C	T	T	C	T	T	T	C	T	C	C	C	Y	C	T	T	T	C	T	T	T	T	N	C	C	C	C	C	T	T	T	C	T	T	C	T
AX-109374386	G/A	1A	497442521	+	NA	NA	NA	NA	NA	NA	G	G	G	A	G	G	A	G	G	G	A	G	A	A	A	R	A	G	G	G	R	G	G	G	G	G	A	A	A	A	N	G	G	G	A	G	G	A	G
AX-109910238	T/C	1A	497442818	+	NA	NA	NA	NA	NA	NA	T	T	T	C	T	T	C	T	T	T	C	T	C	C	C	Y	C	T	T	T	C	T	T	T	T	T	C	C	C	C	C	T	T	T	C	T	T	C	T
AX-111150867	T/G	1A	497532747	+	NA	NA	NA	NA	NA	NA	T	T	T	G	T	T	G	T	T	T	G	T	G	G	G	K	G	T	T	T	G	T	T	T	T	T	G	G	G	G	G	T	T	T	G	T	T	G	T
AX-109847552	C/G	1A	497533001	+	NA	NA	NA	NA	NA	NA	C	C	C	G	C	C	G	C	C	C	G	C	G	G	G	G	G	C	C	C	G	C	C	C	C	C	G	G	G	G	G	C	C	C	G	C	C	G	C
AX-94583334	G/A	1A	498377482	+	NA	NA	NA	NA	NA	NA	G	G	A	A	G	G	A	G	G	G	A	N	A	A	A	R	R	G	G	G	A	G	G	G	G	G	A	R	A	A	A	G	G	G	A	G	G	A	G
AX-111181186	C/T	1A	498377828	+	NA	NA	NA	NA	NA	NA	C	C	T	T	C	C	T	C	C	C	T	C	T	T	T	Y	T	C	C	C	T	C	C	C	C	C	T	T	T	T	T	C	C	C	T	C	C	T	C
AX-95225661	C/T	1A	498475136	+	NA	NA	NA	NA	NA	NA	C	C	C	C	C	T	T	C	T	T	C	T	C	C	C	C	N	T	C	C	C	C	C	N	T	T	T	C	C	C	N	T	C	C	C	C	C	C	C
AX-109358415	A/G	1A	498490102	+	NA	NA	NA	NA	NA	NA	A	N	G	G	A	A	G	A	A	A	G	A	G	G	G	R	G	A	A	A	G	A	A	A	A	A	G	G	G	G	G	N	A	A	G	A	A	G	A
AX-110921717	A/G	1A	498844629	+	NA	NA	NA	NA	NA	NA	A	A	A	G	A	A	G	A	A	A	G	A	G	G	G	R	G	A	A	A	G	A	A	A	A	A	G	G	N	G	G	A	A	A	G	A	A	G	A
AX-109947439	T/C	1A	498978212	+	NA	NA	NA	NA	NA	NA	T	Y	T	C	T	T	C	T	T	T	C	T	C	C	C	Y	C	T	T	T	C	Y	Y	T	T	T	C	C	C	C	C	T	T	T	C	T	T	C	T
AX-111541693	G/T	1A	499142979	+	NA	NA	NA	NA	NA	NA	G	G	G	T	G	G	T	G	G	G	T	G	T	T	T	K	T	G	G	G	T	G	G	G	G	G	T	T	T	T	T	G	G	G	T	G	G	T	G
AX-111156946	G/A	1A	499308252	+	NA	NA	NA	NA	NA	NA	G	G	G	A	G	G	A	G	G	G	A	G	A	A	A	A	A	G	G	G	A	G	G	G	G	G	A	A	A	A	A	G	G	G	A	G	G	A	G
AX-108767634	G/A	1A	499313036	+	NA	NA	NA	NA	NA	NA	G	G	G	A	G	G	A	G	G	G	A	G	A	N	N	N	A	G	G	G	A	G	G	G	G	G	A	A	N	A	A	G	G	G	A	G	G	A	G
AX-109860740	C/T	1A	499314579	+	NA	NA	NA	NA	NA	NA	C	C	T	T	C	C	T	C	C	C	T	C	T	T	T	Y	T	C	C	C	T	C	C	C	C	C	T	T	T	T	T	C	C	C	T	C	C	T	C
AX-110426231	A/G	1A	499792965	+	NA	NA	NA	NA	NA	NA	A	A	G	G	A	A	G	A	A	A	G	A	G	G	G	R	G	A	A	A	G	A	R	A	A	A	G	G	G	G	G	A	A	A	G	A	A	G	A
AX-95652007	A/G	1A	500164355	+	NA	NA	NA	NA	NA	NA	A	A	A	G	A	A	G	A	A	A	G	N	G	R	R	R	R	A	A	A	G	A	A	A	A	A	G	R	R	G	R	A	A	A	G	A	A	G	A
AX-110396000	G/C	1A	500237860	+	NA	NA	NA	NA	NA	NA	G	G	C	C	G	G	C	G	G	G	C	N	C	C	C	S	C	G	G	G	C	G	G	G	G	G	C	C	C	C	C	G	G	G	C	G	G	C	G
AX-110571551	G/A	1A	500328506	+	NA	NA	NA	NA	NA	NA	G	G	G	A	G	G	A	G	G	G	A	G	A	A	A	R	A	G	G	G	A	G	G	G	G	G	A	A	N	A	A	G	G	G	A	G	G	A	G
AX-86167844	T/C	1A	500830691	+	NA	NA	NA	NA	NA	NA	T	T	C	T	T	T	T	C	Y	T	T	T	T	T	T	T	Y	T	T	T	T	T	T	T	T	T	C	Y	T	C	Y	T	T	T	T	T	T	T	T
AX-110046816	G/A	1A	500846552	+	NA	NA	NA	NA	NA	NA	G	G	G	G	G	G	G	A	R	G	G	G	G	G	G	R	A	G	G	G	G	G	G	G	G	G	A	A	G	A	A	G	G	G	G	G	G	G	G
AX-111736411	T/C	1A	501270777	+	NA	NA	NA	NA	NA	NA	T	T	C	T	T	T	T	T	T	T	T	T	T	T	T	T	C	T	T	T	T	T	T	T	T	T	C	C	T	C	C	T	T	T	T	T	T	T	T
AX-111637826	A/G	1A	501815913	+	NA	NA	NA	NA	NA	NA	A	A	G	A	A	A	A	A	A	A	A	A	A	A	A	A	G	A	A	A	A	A	A	A	A	A	G	G	A	G	G	A	A	A	A	A	A	A	A
AX-111529217	C/T	1A	502032719	+	NA	NA	NA	NA	NA	NA	C	C	T	T	C	C	T	C	C	C	T	N	T	T	T	Y	T	C	C	C	T	C	C	C	C	C	T	T	C	T	T	C	C	C	T	C	C	T	C
AX-111132713	A/G	1A	502428090	+	NA	NA	NA	NA	NA	NA	A	N	A	G	A	A	G	A	A	A	N	A	G	G	G	N	G	A	A	N	G	A	A	A	A	A	G	G	A	G	G	A	A	A	G	A	A	G	A
AX-94641695	T/C	1A	502535799	+	NA	NA	NA	NA	NA	NA	C	C	T	T	T	C	Y	T	C	C	T	C	T	Y	Y	C	C	C	Y	C	T	C	C	C	C	C	C	C	C	T	C	C	T	Y	T	C	T	T	Y
AX-109830408	C/A	1A	502962808	+	NA	NA	NA	NA	NA	NA	C	C	A	C	C	C	C	C	C	C	C	C	C	C	C	C	A	C	C	A	C	C	C	C	C	C	C	A	C	A	A	C	C	C	C	A	C	C	C
AX-110606043	A/G	1A	502963363	+	NA	NA	NA	NA	NA	NA	A	A	G	G	A	A	G	A	A	A	G	A	G	G	G	R	G	A	A	G	G	A	N	A	A	A	G	G	A	G	G	A	A	A	G	G	A	G	A
AX-111002026	A/G	1A	502964040	+	NA	NA	NA	NA	NA	NA	A	A	G	G	A	A	G	A	A	A	G	N	G	G	G	R	G	A	A	G	G	A	A	A	A	A	G	G	A	G	G	A	A	A	G	G	A	G	A
AX-111457419	C/T	1A	503042621	+	NA	NA	NA	NA	NA	NA	C	C	C	C	C	C	C	C	C	C	C	C	C	C	C	C	T	C	C	T	C	C	C	C	C	C	C	T	C	T	T	C	C	C	C	T	C	C	C
AX-112289383	G/A	1A	503381240	+	NA	NA	NA	NA	NA	NA	G	G	G	A	G	G	A	G	G	G	A	G	A	A	A	R	G	G	G	G	A	G	G	G	G	G	A	G	G	G	G	G	G	G	A	G	G	A	G
AX-179561619	G/A	1A	503381240	+	NA	NA	NA	NA	NA	NA	G	G	G	A	G	G	A	G	G	G	A	G	A	R	R	R	G	G	G	G	A	G	G	G	G	G	A	G	G	G	G	G	G	G	A	G	G	A	G
AX-94793478	C/T	1A	504023672	+	NA	NA	NA	NA	NA	NA	C	C	C	C	C	C	C	C	C	T	T	C	C	C	C	C	C	T	C	Y	C	C	Y	C	C	T	T	C	N	C	C	C	C	C	C	C	T	C	Y
AX-110687548	T/C	1A	504232798	+	NA	NA	NA	NA	NA	NA	T	T	T	C	T	T	C	C	Y	T	C	C	C	C	C	C	C	T	C	T	C	T	C	T	T	T	T	C	C	C	C	C	T	T	C	T	T	C	T
AX-110934404	C/T	1A	504236144	+	NA	NA	NA	NA	NA	NA	C	C	C	T	C	C	T	T	Y	C	T	T	T	T	T	T	T	C	T	C	T	C	T	C	C	C	C	T	T	T	T	T	C	C	T	C	C	T	C
AX-111455992	T/C	1A	504404869	+	NA	NA	NA	NA	NA	NA	Y	Y	C	T	C	C	T	T	Y	C	T	T	T	T	T	T	T	C	T	Y	T	Y	T	Y	C	C	T	T	T	T	T	T	C	Y	T	Y	C	T	Y
AX-111181015	G/A	1A	504407080	+	NA	NA	NA	NA	NA	NA	R	R	G	G	A	A	G	G	R	A	G	G	G	G	G	G	G	A	G	R	G	R	G	R	A	A	G	G	G	G	G	G	A	R	G	R	A	G	R
AX-86166920	G/A	1A	504411102	+	NA	NA	NA	NA	NA	NA	R	R	A	A	G	N	G	A	G	G	A	G	A	A	A	A	A	G	A	R	A	R	A	R	G	G	G	A	A	A	A	G	G	R	A	N	N	A	R
AX-111805525	A/G	1A	504545216	+	NA	NA	NA	NA	NA	NA	A	A	G	G	A	A	G	G	R	A	G	G	G	G	G	G	G	A	G	A	G	A	G	A	A	A	G	G	G	G	G	G	A	A	G	A	A	G	A
AX-111708316	T/C	1A	504570983	+	NA	NA	NA	NA	NA	NA	T	T	C	C	T	T	C	C	Y	T	C	T	C	C	C	C	C	T	T	T	C	T	T	T	T	T	C	C	C	C	C	T	T	T	C	T	T	C	T
AX-108741088	G/A	1A	504725083	+	NA	NA	NA	NA	NA	NA	G	G	A	A	G	G	A	A	R	G	A	G	A	A	A	A	A	G	G	G	A	G	G	G	G	G	A	A	A	A	A	G	G	G	A	G	G	A	G
AX-111155604	C/T	1A	504742586	+	NA	NA	NA	NA	NA	NA	C	C	C	T	C	C	T	T	Y	C	T	C	T	T	T	T	T	C	C	C	T	C	C	C	C	C	T	T	T	T	T	C	C	C	T	C	C	T	C
AX-111617835	A/G	1A	504864181	+	NA	NA	NA	NA	NA	NA	N	A	G	G	A	A	G	G	R	A	G	N	G	G	G	G	G	A	A	A	G	A	N	N	A	A	G	G	G	G	G	A	A	N	G	A	A	G	A
AX-111060236	A/G	1A	504994950	+	NA	NA	NA	NA	NA	NA	A	A	A	G	A	A	G	G	R	A	G	A	G	G	G	G	G	A	A	A	G	A	A	A	A	A	G	G	G	G	G	A	A	A	G	A	A	G	A
AX-108927297	G/A	1A	505046573	+	NA	NA	NA	NA	NA	NA	G	G	A	A	G	G	A	A	R	G	A	G	A	A	A	A	A	G	G	A	A	G	G	G	G	G	A	A	A	A	A	G	G	G	A	A	G	A	G
AX-110421739	T/C	1A	505163062	+	NA	NA	NA	NA	NA	NA	Y	Y	T	T	C	C	T	T	Y	C	T	C	T	T	T	T	T	C	Y	T	T	Y	Y	Y	C	C	T	T	T	T	T	C	C	Y	T	T	C	T	Y
AX-111020430	C/T	1A	505477732	+	NA	NA	NA	NA	NA	NA	T	T	T	C	N	T	C	T	T	C	C	N	C	C	C	Y	C	C	T	C	C	C	C	C	C	C	T	C	T	C	C	T	C	C	C	C	C	C	C
AX-94773962	A/G	1A	505478668	+	NA	NA	NA	NA	NA	NA	A	A	A	A	A	A	A	A	A	A	A	N	A	A	A	A	A	A	R	A	A	A	N	A	A	A	G	A	A	A	A	G	A	A	A	A	A	A	A
AX-95008533	T/C	1A	505489191	+	NA	NA	NA	NA	NA	NA	C	C	T	T	C	C	T	C	C	T	T	T	T	T	T	T	T	T	T	T	T	T	T	T	T	T	T	T	C	T	T	T	T	T	T	T	T	T	T
AX-95630479	C/T	1A	505493711	+	NA	NA	NA	NA	NA	NA	Y	Y	C	C	T	T	C	N	T	C	C	C	C	C	C	C	C	C	C	C	C	C	Y	C	C	C	C	C	Y	C	C	C	C	C	C	C	C	C	C
AX-109474715	T/A	1A	505516242	+	NA	NA	NA	NA	NA	NA	A	A	T	T	A	A	T	A	A	T	T	T	T	T	T	W	T	T	T	T	T	T	T	T	T	T	T	T	A	T	T	T	T	T	T	T	T	T	T
AX-108911339	C/T	1A	505702772	+	NA	NA	NA	NA	NA	NA	C	C	C	C	C	C	C	C	C	C	C	T	C	C	C	C	C	C	T	C	C	C	C	C	C	C	T	C	C	C	C	T	C	C	C	C	C	C	C
AX-109882536	C/T	1A	505767292	+	NA	NA	NA	NA	NA	NA	T	T	T	C	T	T	C	T	T	C	C	T	C	C	C	Y	C	C	T	C	C	C	C	C	C	C	T	C	T	C	C	T	C	C	C	C	C	C	C
AX-110496490	A/G	1A	505866001	+	NA	NA	NA	NA	NA	NA	A	A	G	A	A	A	A	A	A	A	A	G	A	A	A	A	A	A	G	A	A	A	A	A	A	A	G	A	A	A	A	G	A	A	A	A	A	A	A
AX-110650608	T/C	1A	505893716	+	NA	NA	NA	NA	NA	NA	C	C	C	T	C	C	T	C	C	T	T	C	T	N	T	Y	T	T	C	T	T	T	T	T	T	T	C	T	C	T	T	C	T	T	T	T	T	T	T
AX-111748260	A/G	1A	505893806	+	NA	NA	NA	NA	NA	NA	G	G	G	A	G	G	A	G	G	A	A	N	A	A	A	R	A	A	G	A	A	A	A	A	A	A	G	A	G	A	A	G	A	A	A	A	A	A	A
AX-111062624	T/C	1A	505944143	+	NA	NA	NA	NA	NA	NA	C	C	C	T	C	C	T	C	C	T	T	N	T	T	T	Y	T	T	C	T	T	T	T	T	T	T	C	T	C	T	T	C	T	T	T	T	T	T	T
AX-86173987	C/A	1A	506067216	+	NA	NA	NA	NA	NA	NA	C	C	A	C	C	C	C	C	C	N	C	A	C	C	C	C	C	C	M	C	C	C	C	C	C	C	A	C	M	C	C	A	C	C	C	C	C	C	C
AX-110948247	A/G	1A	506159100	+	NA	NA	NA	NA	NA	NA	A	A	G	A	A	N	A	N	N	A	A	G	A	A	A	A	A	A	R	G	A	A	R	A	A	A	G	A	G	A	A	G	A	A	A	G	A	A	A
AX-110052042	C/T	1A	506189055	+	NA	NA	NA	NA	NA	NA	C	C	C	C	C	C	C	T	Y	T	C	C	C	C	C	Y	T	T	C	C	C	T	C	T	T	T	C	N	C	T	T	C	T	T	C	C	T	C	T
AX-109839508	A/G	1A	506206065	+	NA	NA	NA	NA	NA	NA	A	A	A	A	A	A	A	G	R	G	A	A	A	A	A	R	G	G	A	A	A	G	A	G	G	G	A	G	A	G	G	A	G	G	A	A	G	A	G
AX-110964010	T/C	1A	506216228	+	NA	NA	NA	NA	NA	NA	T	T	T	T	T	T	T	C	Y	C	T	T	T	T	T	Y	C	C	T	T	T	C	T	C	C	C	T	C	T	C	C	T	C	C	T	T	C	T	C
AX-111775504	G/A	1A	506251081	+	NA	NA	NA	NA	NA	NA	G	G	G	G	G	G	G	A	R	A	G	G	G	G	G	R	A	A	G	G	G	A	G	A	A	A	G	A	G	A	A	G	A	A	G	G	A	G	A
AX-110950983	A/G	1A	506251288	+	NA	NA	NA	NA	NA	NA	G	G	A	A	G	G	A	G	G	G	A	A	A	A	A	N	G	G	A	A	A	G	R	G	G	G	A	G	A	G	G	A	G	G	A	A	G	A	G
AX-110054605	C/T	1A	506322246	+	NA	NA	NA	NA	NA	NA	C	N	C	C	C	C	C	T	Y	T	C	C	C	C	C	Y	T	T	C	C	C	T	C	T	T	T	C	T	C	T	T	C	T	T	C	C	T	C	T
AX-111122143	G/T	1A	506392113	+	NA	NA	NA	NA	NA	NA	G	G	G	G	G	G	G	T	K	T	G	G	G	G	G	K	T	T	G	G	G	T	G	T	T	T	G	T	G	T	T	G	T	T	G	G	T	G	T
AX-110028168	A/T	1A	506395176	+	NA	NA	NA	NA	NA	NA	W	W	A	A	T	T	A	T	T	T	A	A	A	A	A	A	W	T	A	A	A	W	A	W	T	T	A	W	A	T	W	A	T	W	A	A	T	A	W
AX-111107440	C/A	1A	506444242	+	NA	NA	NA	NA	NA	NA	A	A	C	C	A	A	C	A	A	A	C	C	C	C	C	M	A	A	C	C	C	A	C	A	A	A	C	A	C	A	A	C	A	A	C	C	A	C	A
AX-110625841	G/A	1A	506515389	+	NA	NA	NA	NA	NA	NA	G	R	G	G	G	R	G	A	A	A	G	G	G	G	G	R	A	A	G	G	G	A	G	A	A	A	G	A	G	A	A	G	A	A	G	G	A	G	A
AX-110967314	C/G	1A	506583557	+	NA	NA	NA	NA	NA	NA	C	C	C	C	C	C	C	G	S	G	C	C	C	C	C	S	G	G	C	C	C	G	C	G	G	G	C	G	C	G	G	C	G	G	C	C	G	C	G
AX-94914663	A/G	1A	506791969	+	NA	NA	NA	NA	NA	NA	R	N	A	A	G	G	A	G	G	G	A	A	A	A	A	A	R	G	A	A	A	N	A	R	G	G	A	R	A	G	R	A	G	R	A	A	G	A	R
AX-86167092	T/C	1A	506795709	+	NA	NA	NA	NA	NA	NA	Y	Y	T	T	C	C	T	C	C	C	T	T	T	T	T	T	Y	C	T	T	T	Y	T	Y	C	C	T	Y	T	C	Y	T	C	Y	T	T	C	T	Y
AX-86167093	T/C	1A	506795709	+	NA	NA	NA	NA	NA	NA	C	C	T	T	C	C	T	C	C	C	T	T	T	T	T	Y	C	C	T	T	T	C	T	C	C	C	T	C	T	C	C	T	C	C	T	T	C	T	C
AX-111607353	T/C	1A	506795897	+	NA	NA	NA	NA	NA	NA	C	C	T	T	C	C	T	C	C	C	T	T	T	T	T	Y	C	C	T	T	T	C	T	C	C	C	T	C	T	C	C	T	C	C	T	T	C	T	C
AX-111015374	G/A	1A	507146734	+	NA	NA	NA	NA	NA	NA	A	A	G	G	A	A	G	A	A	A	G	G	G	G	G	R	A	A	G	G	G	A	G	A	A	A	G	A	G	A	A	G	A	A	G	G	A	G	A
AX-110912803	A/T	1A	507168538	+	NA	NA	NA	NA	NA	NA	T	T	A	A	T	T	A	T	T	T	A	A	A	A	A	W	N	T	A	A	A	T	A	T	T	T	T	T	A	T	T	A	T	T	A	A	T	A	T
AX-111109856	T/C	1A	507216954	+	NA	NA	NA	NA	NA	NA	C	C	T	T	C	C	T	C	C	C	T	T	T	T	T	Y	C	C	T	T	T	C	T	C	C	C	C	C	T	C	C	T	C	C	T	T	C	T	C
AX-110740005	T/C	1A	507272579	+	NA	NA	NA	NA	NA	NA	Y	Y	T	T	C	C	T	C	C	C	T	T	T	T	T	T	Y	C	T	T	T	Y	T	Y	C	C	C	Y	T	C	Y	T	C	Y	T	T	C	T	Y
AX-111235717	T/G	1A	507361362	+	NA	NA	NA	NA	NA	NA	T	N	T	T	T	T	T	G	K	G	T	T	T	T	T	K	G	G	T	T	T	G	N	G	G	G	G	G	T	G	G	T	G	G	T	T	G	T	G
AX-111054050	G/A	1A	507434063	+	NA	NA	NA	NA	NA	NA	G	G	G	G	G	G	G	A	R	A	G	G	G	G	G	G	R	A	G	G	G	R	G	R	A	A	A	R	G	A	R	G	A	R	G	G	A	G	R
AX-95235178	G/T	1A	507804258	+	NA	NA	NA	NA	NA	NA	G	G	T	G	G	G	G	T	K	T	G	G	G	G	G	K	N	T	G	G	G	T	G	T	T	T	G	T	T	T	T	G	T	T	G	G	T	G	T
AX-109289388	T/C	1A	507804795	+	NA	NA	NA	NA	NA	NA	T	T	C	T	T	T	T	C	Y	C	T	T	T	T	T	Y	C	C	T	T	T	C	T	C	C	C	C	C	C	C	C	T	C	C	T	T	C	T	C
AX-111484249	G/C	1A	507949388	+	NA	NA	NA	NA	NA	NA	G	G	C	G	G	G	G	C	S	C	G	G	G	G	G	S	C	C	G	G	G	C	G	C	C	C	C	C	C	C	C	G	C	C	G	G	C	G	C
AX-110927014	C/T	1A	507971080	+	NA	NA	NA	NA	NA	NA	C	C	C	C	C	C	C	T	Y	T	C	C	C	C	C	Y	T	T	C	C	C	T	N	T	T	T	T	T	T	T	T	C	T	T	C	C	T	C	T
AX-108768123	A/C	1A	508315420	+	NA	NA	NA	NA	NA	NA	A	A	A	A	A	A	A	C	M	C	A	A	A	A	A	A	C	C	A	A	A	C	A	C	C	C	A	C	C	C	C	A	C	C	A	A	C	A	C
AX-89634322	A/G	1A	508476828	+	NA	NA	NA	NA	NA	NA	A	A	A	A	A	A	A	A	A	G	A	A	A	A	A	A	G	G	A	A	A	G	A	G	G	G	G	G	G	G	G	A	G	G	A	A	G	A	G
AX-109478899	A/C	1A	508515640	+	NA	NA	NA	NA	NA	NA	A	A	A	A	A	A	C	A	A	A	A	A	A	A	A	A	A	A	A	A	A	A	A	A	A	A	A	A	M	A	A	A	A	A	A	A	A	C	A
AX-111776783	G/A	1A	508519743	+	NA	NA	NA	NA	NA	NA	G	G	A	G	G	G	G	A	R	A	G	G	G	G	G	G	R	A	G	G	G	R	G	R	A	A	A	R	R	A	R	G	A	R	G	G	A	G	R
AX-111071577	C/G	1A	508608242	+	NA	NA	NA	NA	NA	NA	C	C	C	C	C	C	C	C	C	G	C	C	C	C	C	C	G	G	C	C	C	G	C	G	G	G	C	G	G	G	G	C	G	G	C	C	G	C	G
AX-111135532	G/A	1A	508896824	+	NA	NA	NA	NA	NA	NA	G	G	A	G	G	G	G	A	R	A	G	G	G	G	G	R	A	A	G	G	G	A	G	A	A	A	A	A	A	A	A	G	N	A	G	G	A	G	A
AX-110675424	G/A	1A	508985635	+	NA	NA	NA	NA	NA	NA	G	G	A	G	G	G	G	G	G	A	G	G	G	G	G	G	A	A	G	G	G	A	G	A	A	A	A	A	G	A	A	G	A	A	G	G	A	G	A
AX-109056654	T/G	1A	508993585	+	NA	NA	NA	NA	NA	NA	T	T	T	T	T	T	T	T	T	G	T	T	T	T	T	T	K	G	T	T	T	K	T	K	G	G	T	K	T	G	K	T	G	K	T	T	G	T	K
AX-86164645	T/C	1A	509000038	+	NA	NA	NA	NA	NA	NA	T	T	C	T	T	T	T	N	N	C	T	T	T	T	T	T	Y	C	T	T	T	Y	T	Y	C	C	C	Y	Y	C	Y	T	C	Y	T	T	C	T	Y
AX-86164646	T/C	1A	509000038	+	NA	NA	NA	NA	NA	NA	T	T	C	T	T	T	T	C	Y	C	T	T	T	T	T	Y	C	C	T	T	T	C	T	C	C	C	C	C	C	C	C	T	C	C	T	T	C	T	C
AX-108761638	G/C	1A	509056938	+	NA	NA	NA	NA	NA	NA	C	C	G	C	C	C	C	G	S	G	C	N	C	C	C	S	G	G	G	C	C	G	G	G	G	G	G	G	G	G	G	G	G	G	C	G	G	C	G
AX-108834888	C/T	1A	509174034	+	NA	NA	NA	NA	NA	NA	C	C	C	C	C	C	C	C	C	T	C	C	C	C	C	C	T	T	C	C	C	T	C	T	T	T	T	T	C	T	T	C	T	T	C	C	T	C	T
AX-111591884	G/C	1A	509346265	+	NA	NA	NA	NA	NA	NA	G	G	G	G	G	G	G	G	G	C	G	G	G	G	G	G	S	C	G	G	G	S	G	S	C	C	C	S	G	C	S	G	C	S	G	G	C	G	S
AX-110051236	C/T	1A	509631061	+	NA	NA	NA	NA	NA	NA	C	C	C	C	C	C	C	C	C	T	C	C	C	C	C	C	T	T	C	C	C	T	C	T	T	T	T	T	C	T	T	C	T	T	C	C	T	C	T
AX-95188181	G/C	1A	510933352	+	NA	NA	NA	NA	NA	NA	G	G	G	G	G	G	G	S	C	G	G	C	G	G	G	G	N	G	S	G	G	G	S	G	G	G	N	G	S	G	G	C	G	N	G	S	G	G	G
AX-109841797	A/G	1A	510938453	+	NA	NA	NA	NA	NA	NA	A	A	A	A	A	A	A	A	A	G	A	A	A	A	A	A	G	G	A	A	A	G	A	G	G	G	G	G	A	G	G	A	G	G	A	A	G	A	G
AX-109307949	A/G	1A	510963549	+	NA	NA	NA	NA	NA	NA	A	A	A	A	A	A	A	G	R	A	A	G	A	A	A	R	A	A	G	A	A	A	G	A	A	A	A	A	A	A	A	G	A	A	A	G	A	A	A
AX-108781128	T/C	1A	510964167	+	NA	NA	NA	NA	NA	NA	T	T	T	T	T	T	T	T	T	C	T	T	T	T	T	T	C	C	T	T	T	C	T	C	C	C	C	C	C	C	C	T	C	C	T	T	C	T	C
AX-95629393	T/C	1A	511433214	+	NA	NA	NA	NA	NA	NA	C	C	T	C	C	C	C	T	Y	T	C	T	C	C	C	N	T	T	T	C	C	T	T	T	T	T	T	T	C	T	T	T	T	T	C	T	T	C	T
AX-109322069	C/T	1A	511493786	+	NA	NA	NA	NA	NA	NA	C	C	C	C	C	C	C	C	C	T	C	C	C	C	C	C	T	T	C	C	C	T	C	T	T	T	T	T	C	T	T	C	T	T	C	C	T	C	T
AX-178060410	T/C	1A	511504947	+	NA	NA	NA	NA	NA	NA	Y	Y	T	C	Y	C	C	T	N	T	N	T	N	C	N	N	T	T	T	N	C	T	T	T	T	T	T	T	T	T	T	T	T	T	C	T	T	C	T
AX-94442809	T/C	1A	511504947	+	NA	NA	NA	NA	NA	NA	C	C	T	C	C	C	C	T	Y	T	C	N	C	C	C	Y	T	T	T	C	C	T	T	T	T	T	T	T	T	T	T	T	T	T	C	T	T	C	T
AX-94424722	C/T	1A	511504983	+	NA	NA	NA	NA	NA	NA	C	C	T	C	C	C	C	C	C	T	C	C	C	C	C	C	Y	T	C	C	C	Y	Y	Y	T	T	T	Y	Y	T	Y	C	T	Y	C	C	T	C	Y
AX-95652897	T/C	1A	511504983	+	NA	NA	NA	NA	NA	NA	C	C	T	T	T	C	C	T	C	C	T	C	T	C	C	Y	Y	C	C	C	T	Y	C	Y	C	C	C	Y	Y	T	Y	C	T	Y	T	C	T	N	Y
AX-110998252	C/T	1A	511674198	+	NA	NA	NA	NA	NA	NA	T	N	C	T	T	T	T	C	Y	C	T	C	T	T	T	Y	C	C	C	T	T	C	T	C	C	C	C	C	C	C	C	C	C	C	T	Y	C	T	C
AX-110108262	G/A	1A	512142407	+	NA	NA	NA	NA	NA	NA	A	N	G	A	A	A	A	G	R	G	A	G	A	A	A	R	G	G	G	A	A	G	A	G	G	G	G	G	G	G	G	G	G	G	A	G	G	A	G
AX-111824379	C/T	1A	512224478	+	NA	NA	NA	NA	NA	NA	T	T	C	T	T	Y	T	C	Y	C	T	C	T	T	T	Y	C	C	C	T	T	C	T	C	C	C	C	C	C	C	C	C	C	C	T	C	C	T	C
AX-110397023	C/T	1A	512240933	+	NA	NA	NA	NA	NA	NA	T	T	C	T	T	T	T	C	Y	C	T	C	T	T	T	Y	C	C	C	T	T	C	Y	C	C	C	C	C	C	C	C	C	C	C	T	C	C	T	C
AX-179388199	A/G	1A	512367961	+	NA	NA	NA	NA	NA	NA	R	R	G	R	R	G	G	A	A	A	R	A	R	R	R	A	A	A	A	R	R	A	R	A	A	A	G	A	N	A	A	A	A	A	R	A	A	R	A
AX-95662104	A/G	1A	512367961	+	NA	NA	NA	NA	NA	NA	R	R	G	R	R	G	G	A	G	A	R	A	R	R	R	N	A	A	A	R	R	A	R	A	A	A	G	A	R	A	A	A	A	A	R	A	A	R	A
AX-112290140	G/T	1A	512368657	+	NA	NA	NA	NA	NA	NA	G	G	G	G	G	G	G	G	G	T	G	G	G	G	G	G	T	T	G	G	G	T	G	T	T	T	G	T	G	T	T	G	T	T	G	G	T	G	T
AX-95632850	G/T	1A	512369794	+	NA	NA	NA	NA	NA	NA	T	T	K	K	K	T	T	G	K	G	K	G	K	T	T	T	K	G	K	T	K	K	T	K	G	G	G	K	K	G	K	G	G	K	K	K	G	K	K
AX-109747166	A/G	1A	512370365	+	NA	NA	NA	NA	NA	NA	A	A	A	A	A	A	A	A	A	G	A	A	A	A	A	A	R	G	A	A	A	R	A	R	R	G	A	R	A	G	R	A	G	R	A	A	G	A	R
AX-94644377	T/G	1A	512371914	+	NA	NA	NA	NA	NA	NA	T	T	T	T	T	T	T	T	T	G	T	T	T	T	T	T	K	G	T	T	T	K	K	K	G	G	G	K	K	G	K	T	G	K	T	T	G	T	K
AX-86177872	T/C	1A	512372693	+	NA	NA	NA	NA	NA	NA	T	T	T	T	T	T	T	T	T	C	T	T	T	T	T	T	C	C	T	T	T	C	C	C	C	C	N	N	N	C	C	T	C	N	T	T	C	T	N
AX-86177873	T/C	1A	512372693	+	NA	NA	NA	NA	NA	NA	T	T	T	T	T	T	T	T	T	C	T	T	T	T	T	T	T	C	T	T	T	Y	Y	Y	C	C	T	T	T	T	T	T	C	Y	T	T	C	T	Y
AX-108770967	G/C	1A	512392675	+	NA	NA	NA	NA	NA	NA	G	G	C	G	G	G	G	G	G	G	G	G	G	G	G	G	C	G	G	G	G	G	G	G	G	G	C	C	G	C	C	G	G	G	G	G	G	G	G
AX-110185488	A/G	1A	512506999	+	NA	NA	NA	NA	NA	NA	A	A	A	A	A	A	A	A	A	A	A	A	A	A	A	A	G	A	A	A	A	A	A	A	A	A	G	G	A	G	G	A	A	A	A	A	A	A	A
AX-110464628	C/T	1A	512519454	+	NA	NA	NA	NA	NA	NA	T	T	C	T	T	T	T	C	Y	C	T	N	T	T	T	Y	C	C	C	T	T	C	C	C	C	C	C	C	C	C	C	C	C	C	T	C	C	T	C
AX-111032999	T/C	1A	512641422	+	NA	NA	NA	NA	NA	NA	C	C	T	C	C	C	C	T	Y	T	C	T	C	C	C	C	T	T	T	C	C	T	T	T	T	T	T	T	T	T	T	T	T	T	C	T	T	C	T
AX-109419458	G/A	1A	512643564	+	NA	NA	NA	NA	NA	NA	G	G	G	G	G	G	G	G	G	G	G	G	G	G	G	G	A	G	G	G	G	G	G	G	G	G	A	A	G	A	A	G	G	G	G	G	G	G	G
AX-108986678	C/T	1A	512643768	+	NA	NA	NA	NA	NA	NA	T	T	C	T	T	T	T	C	Y	C	T	C	T	T	T	Y	C	C	C	T	T	C	C	C	C	C	C	C	N	C	C	C	C	C	T	C	C	T	C
AX-110099156	T/G	1A	512647617	+	NA	NA	NA	NA	NA	NA	T	T	G	T	T	T	T	T	T	T	T	T	T	T	T	T	G	T	T	T	T	T	T	T	T	T	G	G	G	G	G	T	T	T	T	T	T	T	T
AX-109291490	C/A	1A	513077700	+	NA	NA	NA	NA	NA	NA	A	A	C	C	A	A	C	C	M	C	C	C	C	C	C	C	C	C	C	C	C	C	C	C	C	C	C	C	C	C	C	C	C	C	C	M	C	C	N
AX-110485599	A/C	1A	513133181	+	NA	NA	NA	NA	NA	NA	C	C	A	A	M	C	A	A	M	M	A	A	A	A	A	A	A	A	A	A	A	A	A	A	A	A	A	A	A	A	A	A	A	A	A	A	A	A	A
AX-109884244	G/T	1A	513171030	+	NA	NA	NA	NA	NA	NA	T	T	G	G	T	T	G	G	K	G	G	G	G	G	G	G	G	G	G	G	G	G	G	G	G	G	G	G	G	G	G	G	G	G	G	G	G	G	G
AX-111533298	C/A	1A	513309332	+	NA	NA	NA	NA	NA	NA	C	C	C	C	C	C	C	C	C	C	C	A	C	C	C	C	A	C	A	C	C	C	C	C	C	C	A	N	C	A	A	A	C	C	C	A	C	C	C
AX-110425196	G/A	1A	513331621	+	NA	NA	NA	NA	NA	NA	A	A	G	G	A	A	G	G	R	G	G	G	G	G	G	G	G	G	G	G	G	G	G	G	G	G	G	G	G	G	G	G	G	G	G	G	G	G	G
AX-179557745	A/G	1A	513366463	+	NA	NA	NA	NA	NA	NA	G	G	G	A	G	G	A	A	R	A	A	G	A	A	A	A	G	A	G	A	A	R	A	R	A	A	G	G	R	G	G	G	A	A	A	G	A	A	A
AX-95630294	A/G	1A	513366463	+	NA	NA	NA	NA	NA	NA	G	G	G	A	G	G	A	A	R	A	A	G	A	A	A	A	G	A	G	A	A	A	A	A	A	A	G	G	A	G	G	G	A	A	A	G	A	A	A
AX-111186638	T/A	1A	513369718	+	NA	NA	NA	NA	NA	NA	A	A	T	T	A	N	T	T	W	T	T	T	T	T	T	T	T	T	T	T	T	T	T	T	T	T	T	T	T	T	T	T	T	T	T	T	T	T	T
AX-109280865	T/C	1A	513468119	+	NA	NA	NA	NA	NA	NA	T	T	T	T	T	T	T	T	T	T	T	C	T	T	T	T	Y	T	Y	T	T	T	T	T	T	T	C	Y	T	C	Y	C	T	T	T	Y	T	T	T
AX-86175848	T/C	1A	513546400	+	NA	NA	NA	NA	NA	NA	C	C	C	T	C	C	T	T	Y	T	T	C	T	T	T	T	C	T	C	T	T	T	C	T	T	T	C	C	T	C	C	C	T	T	T	C	T	T	T
AX-109424827	T/G	1A	513610483	+	NA	NA	NA	NA	NA	NA	K	K	G	T	T	K	T	K	K	T	T	G	T	T	T	T	G	T	G	T	T	T	T	T	T	T	G	G	T	G	G	G	T	T	T	G	T	T	T
AX-109627673	G/A	1A	513627682	+	NA	NA	NA	NA	NA	NA	G	G	A	G	G	G	G	G	G	G	G	A	G	G	G	G	A	G	A	G	G	G	G	G	G	G	A	A	G	A	A	A	G	G	G	A	G	G	G
AX-110389555	C/A	1A	513768039	+	NA	NA	NA	NA	NA	NA	C	C	A	C	C	C	C	C	C	C	C	A	C	C	C	C	A	C	A	C	C	C	C	C	C	C	A	A	C	A	A	A	C	C	C	A	C	C	C
AX-109302751	T/C	1A	513848122	+	NA	NA	NA	NA	NA	NA	Y	Y	C	T	T	T	T	T	T	T	T	T	T	Y	Y	Y	C	T	Y	Y	T	Y	Y	Y	T	T	C	C	Y	C	C	T	T	Y	T	Y	T	T	Y
AX-112288757	C/T	1A	514643516	+	NA	NA	NA	NA	NA	NA	C	C	C	T	C	C	T	T	Y	C	T	C	T	Y	Y	Y	C	C	C	Y	T	C	C	C	C	C	C	C	Y	C	C	C	C	C	T	C	C	T	C
AX-95653913	C/T	1A	514643516	+	NA	NA	NA	NA	NA	NA	C	C	C	T	C	C	T	T	Y	C	T	C	T	T	T	T	C	C	C	T	T	C	C	C	C	C	C	C	T	C	C	C	C	C	T	C	C	T	C
AX-178075830	G/A	1A	514954502	+	NA	NA	NA	NA	NA	NA	G	G	A	A	G	G	A	A	G	G	A	G	A	R	R	R	G	G	G	R	A	G	N	G	G	G	A	G	R	G	G	G	G	G	A	G	G	A	G
AX-94987165	G/A	1A	514954502	+	NA	NA	NA	NA	NA	NA	G	G	A	A	G	G	A	A	R	G	A	G	A	R	R	R	G	G	G	R	A	G	G	G	G	G	G	G	R	G	G	G	G	G	N	G	G	A	G
AX-110545246	C/T	1A	515187563	+	NA	NA	NA	NA	NA	NA	C	C	C	C	T	C	C	C	C	T	C	T	C	C	C	C	C	T	Y	C	C	Y	C	Y	T	T	C	C	C	C	C	T	T	Y	C	Y	T	C	Y
AX-109276285	A/G	1A	515188769	+	NA	NA	NA	NA	NA	NA	A	A	A	A	G	A	A	A	A	G	A	G	A	A	A	A	A	G	R	A	A	R	A	R	G	G	A	A	A	A	A	G	G	G	A	G	G	A	G
AX-179559826	A/G	1A	515188769	+	NA	NA	NA	NA	NA	NA	A	A	A	A	G	A	A	A	A	G	A	G	A	A	A	A	A	G	G	A	A	G	A	G	G	G	A	A	A	A	A	G	G	G	A	G	G	A	G
AX-94449293	T/C	1A	515189485	+	NA	NA	NA	NA	NA	NA	T	N	T	C	T	T	C	C	T	T	C	T	C	C	C	C	T	T	T	C	C	N	T	T	T	T	T	T	C	T	T	T	T	T	C	T	T	C	T
AX-95652309	T/C	1A	515189485	+	NA	NA	NA	NA	NA	NA	T	T	T	C	T	T	C	C	Y	T	C	T	C	Y	Y	Y	T	T	T	Y	C	T	T	T	T	T	T	T	Y	T	T	T	T	T	C	T	T	C	T
AX-111084655	G/T	1A	515197019	+	NA	NA	NA	NA	NA	NA	G	G	G	T	G	G	T	T	K	G	T	N	T	T	T	T	G	G	G	T	T	G	G	G	G	G	G	G	T	G	G	G	G	G	T	G	G	T	G
AX-111614788	G/C	1A	515323374	+	NA	NA	NA	NA	NA	NA	G	G	G	G	C	G	G	G	G	C	G	C	G	G	G	G	G	C	C	G	G	C	G	C	C	C	G	G	G	G	G	C	C	C	G	C	C	G	C
AX-110927081	C/T	1A	515886936	+	NA	NA	NA	NA	NA	NA	C	C	T	C	T	C	C	C	C	T	C	Y	C	C	C	C	C	T	Y	C	C	T	C	T	T	T	C	C	C	C	C	T	T	T	C	T	T	C	T
AX-111025960	T/C	1A	515892248	+	NA	NA	NA	NA	NA	NA	T	T	T	T	T	T	T	T	T	T	T	T	T	T	T	T	C	T	T	T	T	T	T	T	T	T	C	C	T	C	C	T	T	T	T	T	T	T	T
AX-95634728	A/C	1A	515928068	+	NA	NA	NA	NA	NA	NA	A	A	A	A	A	A	A	A	A	A	A	A	A	N	M	N	C	A	A	A	A	A	A	A	A	A	C	C	N	C	C	A	A	A	A	A	A	A	A
AX-110533492	G/A	1A	515933623	+	NA	NA	NA	NA	NA	NA	G	G	G	G	G	G	G	G	G	G	G	G	G	G	G	G	A	G	G	R	G	G	G	G	G	G	A	A	G	A	A	G	G	G	G	G	G	G	G
AX-111556984	T/C	1A	516015818	+	NA	NA	NA	NA	NA	NA	T	T	C	T	C	T	T	T	T	C	T	C	T	T	T	T	T	C	Y	T	T	Y	N	Y	C	C	T	T	T	T	T	C	C	Y	T	Y	C	T	Y
AX-111079307	A/G	1A	516030852	+	NA	NA	NA	NA	NA	NA	A	A	G	A	G	A	A	A	A	G	A	G	A	A	A	A	A	G	R	A	A	R	A	R	G	G	A	A	A	A	A	G	G	R	A	R	G	A	R
AX-111063889	C/T	1A	516036500	+	NA	NA	NA	NA	NA	NA	C	C	Y	C	T	C	C	C	C	T	C	T	C	C	C	C	C	T	Y	C	C	Y	C	Y	T	T	C	C	C	C	C	T	T	Y	C	Y	T	C	Y
AX-110972166	G/T	1A	516044380	+	NA	NA	NA	NA	NA	NA	G	G	T	T	G	G	T	T	K	G	T	G	T	T	T	T	T	G	G	T	T	G	G	G	G	G	T	T	T	T	T	G	G	G	T	G	G	T	G
AX-111568685	C/T	1A	516097302	+	NA	NA	NA	NA	NA	NA	T	T	T	Y	C	T	T	Y	T	C	Y	C	Y	T	T	T	T	C	Y	T	Y	Y	T	Y	C	C	T	T	N	Y	T	C	C	Y	Y	Y	C	Y	Y
AX-109303329	G/A	1A	516162838	+	NA	NA	NA	NA	NA	NA	G	G	G	G	G	G	G	G	G	G	G	G	G	G	G	G	A	G	G	G	G	G	G	G	G	G	A	A	G	A	A	G	G	G	G	G	G	G	G
AX-111487065	T/G	1A	516163064	+	NA	NA	NA	NA	NA	NA	T	N	T	T	T	T	T	T	T	T	T	T	T	T	N	N	G	T	T	T	T	T	N	T	T	T	G	G	T	G	G	T	T	T	T	T	T	T	T
AX-110475704	C/T	1A	516585495	+	NA	NA	NA	NA	NA	NA	T	T	C	T	C	T	T	T	T	C	T	N	T	T	T	T	C	C	C	T	T	C	T	C	C	C	C	C	T	C	C	C	C	C	T	C	C	T	C
AX-110633731	G/A	1A	516587488	+	NA	NA	NA	NA	NA	NA	R	N	R	R	G	A	G	R	G	G	R	G	R	R	R	R	G	G	G	R	R	G	G	G	G	G	G	G	R	G	G	G	G	G	R	G	G	R	G
AX-95651902	A/G	1A	516587488	+	NA	NA	NA	NA	NA	NA	A	A	G	A	G	A	A	A	A	G	A	G	A	A	A	A	R	G	R	A	A	R	A	R	G	G	G	R	A	G	R	G	G	N	A	R	G	A	R
AX-111075717	A/C	1A	516674943	+	NA	NA	NA	NA	NA	NA	A	A	A	C	A	A	C	C	M	A	C	A	C	C	C	C	C	A	A	C	C	A	A	A	A	A	C	C	A	C	C	A	A	A	C	A	A	C	A
AX-95629996	A/C	1A	516674943	+	NA	NA	NA	NA	NA	NA	A	A	A	M	A	A	C	C	M	A	C	A	C	N	M	M	C	A	A	C	M	A	A	A	A	A	C	C	A	C	C	A	A	A	M	A	A	M	A
AX-95246262	T/G	1A	516675018	+	NA	NA	NA	NA	NA	NA	G	G	G	T	T	G	T	T	K	T	T	T	T	T	T	T	T	T	T	T	T	T	G	T	T	T	T	T	G	T	T	T	T	T	T	T	T	T	T
AX-94433348	G/A	1A	516743708	+	NA	NA	NA	NA	NA	NA	A	A	G	G	A	A	G	A	A	A	A	A	A	G	G	G	A	A	A	G	G	A	G	N	A	G	A	A	G	A	A	G	A	G	G	G	A	G	G
AX-110623900	G/A	1A	516746275	+	NA	NA	NA	NA	NA	NA	G	G	G	G	A	G	G	G	G	A	G	A	G	G	G	G	G	A	R	G	G	R	G	R	A	A	A	G	G	G	G	A	A	R	G	R	A	G	R
AX-94519549	C/A	1A	516746499	+	NA	NA	NA	NA	NA	NA	C	C	C	C	A	C	C	C	C	A	C	A	C	C	C	C	C	A	M	C	C	M	C	M	A	A	A	C	C	C	C	A	A	M	C	M	A	C	M
AX-86170658	A/G	1A	516748614	+	NA	NA	NA	NA	NA	NA	G	N	A	A	A	G	A	A	R	A	A	A	A	A	A	A	A	A	A	A	A	A	G	A	A	A	A	A	G	A	A	A	A	A	A	A	A	A	A
AX-86170659	A/G	1A	516748614	+	NA	NA	NA	NA	NA	NA	G	G	A	A	A	G	A	A	N	A	A	A	A	A	A	A	A	A	A	A	A	A	G	A	A	A	A	A	N	A	A	A	A	A	A	A	A	A	A
AX-95071361	C/T	1A	516957157	+	NA	NA	NA	NA	NA	NA	T	T	C	C	C	T	C	C	Y	C	C	C	C	C	C	C	C	C	C	C	C	C	T	C	C	C	C	C	T	C	C	C	C	C	C	C	C	C	C
AX-108867136	G/T	1A	516981644	+	NA	NA	NA	NA	NA	NA	G	G	T	T	G	G	T	T	K	G	T	N	T	T	T	T	T	G	G	T	T	G	G	G	G	G	G	T	G	T	T	G	G	G	T	G	G	T	G
AX-109834882	T/C	1A	517062508	+	NA	NA	NA	NA	NA	NA	T	T	C	C	T	T	C	C	Y	T	C	T	C	C	C	C	C	T	T	C	C	T	T	T	T	T	T	C	T	C	C	T	T	T	C	T	T	C	T
AX-95236907	A/G	1A	517068181	+	NA	NA	NA	NA	NA	NA	G	G	N	A	G	G	A	G	G	G	G	G	G	A	A	A	G	G	G	A	A	G	A	G	G	A	G	G	G	G	G	A	G	A	A	A	G	A	A
AX-111040673	G/T	1A	518207626	+	NA	NA	NA	NA	NA	NA	T	T	G	G	G	T	G	G	K	G	G	G	G	G	G	G	G	G	G	G	G	G	T	G	G	G	G	G	T	G	G	G	G	G	G	G	G	G	G
AX-109337524	G/A	1A	518271548	+	NA	NA	NA	NA	NA	NA	A	A	G	G	A	A	G	G	R	A	G	G	G	G	G	G	G	A	G	G	G	A	A	A	A	A	A	G	A	G	G	G	A	A	G	G	A	G	A
AX-95192108	G/C	1A	518295329	+	NA	NA	NA	NA	NA	NA	G	G	G	G	G	G	G	G	G	G	G	C	G	G	G	G	G	G	S	G	G	G	G	G	G	G	G	G	G	G	G	C	G	G	G	S	G	G	G
AX-110963054	A/G	1A	518296757	+	NA	NA	NA	NA	NA	NA	G	G	A	A	G	G	A	A	R	G	A	A	A	A	A	A	A	G	A	A	A	G	G	G	G	G	G	A	G	A	A	A	G	G	A	A	G	A	G
AX-109972550	T/C	1A	518296794	+	NA	NA	NA	NA	NA	NA	C	C	T	T	C	C	T	T	Y	C	T	T	T	T	T	T	T	C	T	T	T	C	C	C	C	C	C	T	C	T	T	T	C	C	T	T	C	T	C
AX-111597788	C/T	1A	518365015	+	NA	NA	NA	NA	NA	NA	T	T	C	C	C	T	C	C	Y	C	C	C	C	C	C	C	C	C	C	C	C	C	T	C	C	C	C	C	T	C	C	C	C	C	C	C	C	C	C
AX-111669423	C/T	1A	518365907	+	NA	NA	NA	NA	NA	NA	T	T	C	C	C	T	C	C	Y	C	C	C	C	C	C	C	C	C	C	C	C	C	T	C	C	C	C	C	T	C	C	C	C	C	C	C	C	C	C
AX-109273305	T/C	1A	518369892	+	NA	NA	NA	NA	NA	NA	C	C	T	T	C	C	T	T	Y	C	T	T	T	T	T	T	T	C	T	T	T	C	C	C	C	C	C	T	C	T	T	T	C	C	T	T	C	T	C
AX-111620282	G/A	1A	518372585	+	NA	NA	NA	NA	NA	NA	A	A	G	G	A	A	G	G	R	A	G	G	G	G	G	G	G	A	G	G	G	A	N	A	A	A	A	G	A	G	G	G	A	A	G	G	A	G	A
AX-110005694	T/C	1A	518530547	+	NA	NA	NA	NA	NA	NA	C	C	T	T	Y	C	T	T	Y	Y	T	T	T	T	T	T	T	Y	T	T	T	Y	C	Y	Y	Y	Y	T	Y	T	T	T	Y	Y	T	T	Y	T	Y
AX-110367484	C/G	1A	518563756	+	NA	NA	NA	NA	NA	NA	G	G	C	C	C	G	C	C	S	C	C	C	C	C	C	C	C	C	C	C	C	C	G	C	C	C	C	C	G	C	C	C	C	C	C	C	C	C	C
AX-109345497	G/C	1A	518797077	+	NA	NA	NA	NA	NA	NA	C	C	G	G	G	C	G	G	S	G	G	G	G	G	G	G	G	G	G	G	G	G	S	G	G	G	G	G	C	G	G	N	G	G	G	G	G	G	G
AX-109412792	A/C	1A	518803150	+	NA	NA	NA	NA	NA	NA	C	C	A	A	A	C	A	A	M	A	A	A	A	A	A	A	A	A	A	A	A	A	C	A	A	A	A	A	C	N	A	A	A	A	A	A	A	A	A
AX-95653143	C/T	1A	519547667	+	NA	NA	NA	NA	NA	NA	C	C	C	T	C	C	T	C	C	C	C	C	C	Y	Y	Y	C	C	C	Y	T	C	Y	C	C	T	C	C	C	C	C	T	C	Y	T	Y	C	T	Y
AX-109371208	C/G	1A	520687215	+	NA	NA	NA	NA	NA	NA	G	G	C	C	G	G	C	C	S	C	C	S	C	C	C	C	C	C	G	C	C	C	C	C	C	C	G	C	G	C	C	G	C	C	C	G	C	C	C
AX-111712477	A/G	1A	520701182	+	NA	NA	NA	NA	NA	NA	R	R	A	A	G	G	A	A	A	A	A	G	A	N	A	A	A	A	R	A	A	A	R	A	A	A	A	A	R	A	A	G	A	A	A	R	A	A	A
AX-110941113	A/G	1A	520899900	+	NA	NA	NA	NA	NA	NA	G	G	A	A	G	G	A	A	R	A	A	G	A	A	A	A	A	A	G	A	A	A	R	A	A	A	G	N	G	A	A	G	A	A	A	G	A	A	A
AX-108725314	C/T	1A	520971820	+	NA	NA	NA	NA	NA	NA	T	T	C	C	T	T	C	C	Y	C	C	T	C	C	C	C	C	C	T	C	C	C	C	C	C	C	T	C	T	C	C	T	C	C	C	T	C	C	C
AX-111570601	C/T	1A	520973557	+	NA	NA	NA	NA	NA	NA	T	T	C	C	T	T	C	C	Y	C	C	T	C	C	C	C	C	C	T	C	C	C	C	C	C	C	T	C	T	C	C	T	C	C	C	T	C	C	C
AX-111018634	G/A	1A	521036258	+	NA	NA	NA	NA	NA	NA	A	A	G	G	A	A	G	G	R	G	G	A	G	G	G	G	G	G	A	G	G	G	G	G	G	G	A	G	A	G	G	A	G	G	G	A	G	G	G
AX-110445831	C/T	1A	521138191	+	NA	NA	NA	NA	NA	NA	T	T	C	C	T	T	C	C	Y	C	C	T	C	C	C	C	C	C	T	C	C	C	C	C	C	C	T	C	T	C	C	T	C	C	C	T	C	C	C
AX-109287966	C/T	1A	521318053	+	NA	NA	NA	NA	NA	NA	T	T	C	C	T	T	C	C	Y	C	C	T	C	C	C	C	C	C	T	C	C	C	C	C	C	C	T	C	T	C	C	T	C	C	C	T	C	C	C
AX-109985412	T/C	1A	521417201	+	NA	NA	NA	NA	NA	NA	C	C	N	T	C	C	Y	T	Y	T	T	C	T	Y	T	T	T	T	C	T	T	T	Y	T	T	Y	C	T	C	T	T	C	T	Y	T	C	T	Y	Y
AX-108822716	A/G	1A	521571082	+	NA	NA	NA	NA	NA	NA	G	G	A	A	G	G	A	A	R	A	A	G	A	A	A	A	A	A	G	A	A	A	A	A	A	A	G	A	G	A	A	G	A	A	A	G	A	A	A
AX-110634728	G/A	1A	521675189	+	NA	NA	NA	NA	NA	NA	R	R	G	G	A	A	G	G	R	G	G	N	G	G	G	G	G	N	R	G	G	G	G	G	G	G	A	G	G	G	G	A	G	G	G	R	G	G	G
AX-179559126	A/C	1A	521747936	+	NA	NA	NA	NA	NA	NA	C	C	C	C	C	C	C	A	M	A	A	A	C	C	C	M	A	A	A	C	C	A	C	A	A	A	C	A	A	A	A	A	A	A	C	A	A	C	A
AX-95631320	A/C	1A	521747936	+	NA	NA	NA	NA	NA	NA	C	C	C	C	C	C	C	A	M	A	A	A	C	C	C	M	A	A	A	C	C	A	C	A	A	A	C	A	A	A	A	A	A	A	C	A	A	C	A
AX-94673659	G/A	1A	521747992	+	NA	NA	NA	NA	NA	NA	G	G	G	A	G	G	A	G	G	G	G	G	G	R	R	R	G	G	G	R	A	G	R	G	G	A	G	G	G	G	G	N	G	R	A	R	G	A	R
AX-179559001	C/T	1A	521748451	+	NA	NA	NA	NA	NA	NA	C	C	C	C	C	C	C	T	T	T	T	T	C	C	C	C	Y	T	Y	C	C	Y	C	Y	T	T	C	Y	Y	T	Y	T	T	Y	C	Y	T	C	Y
AX-95631243	T/C	1A	521748451	+	NA	NA	NA	NA	NA	NA	C	C	C	C	C	C	C	T	Y	T	T	Y	C	C	C	Y	T	T	T	C	C	T	C	T	T	T	C	T	T	T	N	T	T	T	C	T	T	C	T
AX-94433579	C/A	1A	521797585	+	NA	NA	NA	NA	NA	NA	M	M	C	A	N	C	A	C	C	C	C	A	N	M	A	A	M	C	A	C	A	M	A	M	C	C	C	M	M	C	M	A	C	M	A	A	C	A	M
AX-89565010	A/C	1A	521826803	+	NA	NA	NA	NA	NA	NA	C	C	A	C	C	C	C	A	C	A	A	A	C	C	C	C	A	A	A	C	C	A	C	A	A	A	A	A	C	A	A	A	A	A	C	A	A	C	A
AX-86172393	C/T	1A	521827032	+	NA	NA	NA	NA	NA	NA	C	C	C	C	C	C	C	T	C	T	T	C	C	C	C	C	T	T	C	C	C	T	C	T	T	T	C	T	C	T	T	C	T	T	C	C	T	C	T
AX-86172394	C/T	1A	521827032	+	NA	NA	NA	NA	NA	NA	C	C	C	C	C	C	C	T	C	T	T	C	C	C	C	C	T	T	C	C	C	T	C	T	T	T	C	T	C	T	T	C	T	T	C	C	T	C	T
AX-108774424	A/G	1A	521967205	+	NA	NA	NA	NA	NA	NA	G	G	G	G	G	G	G	A	G	A	A	A	G	G	G	G	A	A	A	G	G	A	G	A	A	A	G	A	G	A	A	A	A	A	G	A	A	G	A
AX-109353821	C/A	1A	522002543	+	NA	NA	NA	NA	NA	NA	C	C	C	C	C	C	C	A	C	A	A	C	C	C	C	C	M	A	C	C	C	M	C	M	A	A	A	M	C	A	M	C	A	M	C	C	A	C	M
AX-110472117	T/C	1A	522011584	+	NA	NA	NA	NA	NA	NA	C	C	T	N	C	C	C	T	C	T	T	T	C	C	C	C	T	T	T	C	C	T	C	T	T	T	T	T	C	T	T	T	T	T	C	T	T	C	T
AX-95682582	T/C	1A	522011584	+	NA	NA	NA	NA	NA	NA	Y	Y	T	C	C	C	C	T	C	T	T	T	C	Y	Y	Y	T	T	T	Y	C	T	Y	T	T	T	T	T	Y	T	T	T	T	T	C	T	T	C	T
AX-86162915	T/C	1A	522013211	+	NA	NA	NA	NA	NA	NA	T	T	T	T	T	T	T	C	T	C	C	T	T	T	T	T	N	C	T	T	T	Y	T	Y	C	C	C	Y	T	C	Y	T	C	Y	T	T	C	T	Y
AX-86162916	T/C	1A	522013211	+	NA	NA	NA	NA	NA	NA	T	T	T	T	T	T	T	C	T	C	C	T	T	T	T	T	Y	C	T	T	T	Y	T	Y	N	C	C	Y	T	C	Y	T	N	Y	T	T	C	T	Y
AX-112291221	A/C	1A	522013875	+	NA	NA	NA	NA	NA	NA	A	A	C	A	A	A	A	C	A	C	C	C	A	A	A	A	M	C	M	A	A	M	A	M	C	C	C	M	A	C	M	C	C	M	A	M	C	A	M
AX-95634448	C/A	1A	522013875	+	NA	NA	NA	NA	NA	NA	A	A	C	A	A	A	A	C	A	C	C	C	A	A	A	A	C	C	C	A	A	C	A	C	C	C	C	C	A	C	C	C	C	C	A	C	C	A	C
AX-94535560	A/G	1A	522053326	+	NA	NA	NA	NA	NA	NA	G	G	A	G	G	G	G	A	G	A	A	A	G	G	G	G	A	A	A	G	G	A	G	A	A	A	G	A	G	A	A	A	A	A	G	A	A	G	A
AX-109514069	G/A	1A	522158593	+	NA	NA	NA	NA	NA	NA	G	G	G	G	G	G	G	A	G	A	A	G	G	G	G	G	A	A	G	G	G	A	G	A	A	A	G	A	G	A	A	G	A	A	G	G	A	G	A
AX-110421859	A/C	1A	522162429	+	NA	NA	NA	NA	NA	NA	A	A	A	A	A	A	A	C	A	C	C	A	A	A	A	A	C	C	A	A	A	M	A	C	C	C	A	C	A	C	C	A	C	C	A	A	C	A	C
AX-111778628	G/C	1A	522217844	+	NA	NA	NA	NA	NA	NA	G	G	G	G	G	G	G	C	G	C	C	G	G	G	G	G	C	C	G	G	G	C	G	C	C	C	G	S	G	C	C	G	C	C	G	G	C	G	C
AX-112290296	T/C	1A	522254732	+	NA	NA	NA	NA	NA	NA	T	T	C	T	T	T	T	C	T	C	C	C	T	T	T	T	Y	C	Y	T	T	Y	T	Y	C	C	C	Y	T	C	Y	C	C	Y	T	Y	C	T	Y
AX-95683840	C/T	1A	522254732	+	NA	NA	NA	NA	NA	NA	T	T	C	T	T	T	T	C	T	C	C	C	T	T	T	T	C	C	C	T	T	C	T	C	C	C	C	C	T	C	C	C	C	C	T	C	C	T	C
AX-110056091	A/C	1A	522256629	+	NA	NA	NA	NA	NA	NA	C	C	C	C	C	C	C	A	C	A	A	A	C	C	C	N	A	A	A	C	C	A	C	A	A	A	C	A	C	A	A	A	A	A	C	A	A	C	A
AX-95651999	A/C	1A	522256629	+	NA	NA	NA	NA	NA	NA	C	C	C	C	C	C	C	A	C	A	A	A	C	C	C	C	A	A	A	C	C	A	C	A	A	A	C	A	C	A	A	A	A	A	C	A	A	C	A
AX-110515890	G/A	1A	522327653	+	NA	NA	NA	NA	NA	NA	A	A	G	A	A	A	A	G	A	G	G	N	A	A	A	A	G	G	G	A	A	G	A	G	G	G	G	G	A	G	G	G	G	G	A	G	G	A	G
AX-110024986	G/T	1A	522362339	+	NA	NA	NA	NA	NA	NA	G	G	G	G	G	G	G	T	G	T	T	G	G	G	G	G	T	T	G	G	G	T	N	T	T	T	T	T	G	T	T	G	T	T	G	G	T	G	T
AX-110920490	G/C	1A	522592006	+	NA	NA	NA	NA	NA	NA	C	C	G	G	C	C	G	G	C	G	G	G	G	G	G	S	G	G	G	G	G	G	G	G	G	G	C	G	G	G	G	G	G	G	G	G	G	G	G
AX-108939856	G/T	1A	522974793	+	NA	NA	NA	NA	NA	NA	G	G	T	G	G	G	G	T	G	T	T	G	G	G	G	G	T	T	G	G	G	T	G	K	T	T	G	N	G	T	N	G	T	K	G	G	T	G	T
AX-179560291	T/G	1A	523039262	+	NA	NA	NA	NA	NA	NA	T	T	G	K	K	T	T	G	T	G	G	T	K	T	T	T	K	G	T	T	K	K	T	K	G	G	T	K	T	G	K	T	G	K	K	T	G	K	K
AX-111081078	G/A	1A	523070977	+	NA	NA	NA	NA	NA	NA	A	A	G	G	A	A	G	G	A	G	G	G	G	G	G	R	G	G	G	G	G	G	G	G	G	G	G	G	G	G	G	G	G	G	G	G	G	G	G
AX-108799275	A/G	1A	523146649	+	NA	NA	NA	NA	NA	NA	G	G	A	A	G	G	A	A	G	A	A	A	A	A	A	R	A	A	A	A	A	A	A	A	A	A	G	A	A	A	A	A	A	A	A	A	A	A	A
AX-89692151	C/T	1A	523298944	+	NA	NA	NA	NA	NA	NA	C	C	T	C	C	C	C	T	C	T	T	C	C	C	C	C	Y	T	C	C	C	T	C	T	T	T	T	Y	C	T	Y	C	T	T	C	C	T	C	T
AX-110561396	C/A	1A	523299732	+	NA	NA	NA	NA	NA	NA	C	C	A	C	C	C	C	A	C	A	A	C	C	C	C	C	M	A	C	C	C	M	C	M	A	A	C	M	C	A	M	C	A	M	C	C	A	C	M
AX-110585885	G/A	1A	523313725	+	NA	NA	NA	NA	NA	NA	A	A	G	G	A	A	G	G	A	G	G	G	G	G	G	R	G	G	G	G	G	G	G	G	G	G	G	G	G	G	G	G	G	G	G	G	G	G	G
AX-109926272	A/G	1A	523362654	+	NA	NA	NA	NA	NA	NA	A	A	G	A	A	A	A	G	A	G	G	A	A	A	A	A	G	G	A	A	A	G	A	G	G	G	A	G	A	G	R	A	G	G	A	A	G	A	G
AX-108938054	C/T	1A	523574810	+	NA	NA	NA	NA	NA	NA	C	C	T	C	C	C	C	T	C	T	T	C	C	C	C	C	N	T	C	C	C	T	C	T	T	T	T	T	C	T	T	C	T	T	C	C	T	C	T
AX-112286541	G/A	1A	523779906	+	NA	NA	NA	NA	NA	NA	A	A	A	G	A	A	G	A	A	A	A	G	G	G	G	R	A	A	G	G	G	A	G	A	A	A	A	A	G	A	A	G	A	A	G	G	A	G	A
AX-111161974	T/C	1A	523940977	+	NA	NA	NA	NA	NA	NA	C	C	T	T	C	C	T	T	C	T	T	T	T	T	T	Y	T	T	T	T	T	T	T	T	T	T	T	T	C	T	T	T	T	T	T	T	T	T	T
AX-109446453	T/C	1A	523941127	+	NA	NA	NA	NA	NA	NA	T	T	C	T	T	T	T	C	T	C	C	T	T	T	T	T	C	Y	T	T	T	C	T	C	C	C	T	C	T	C	C	T	C	C	T	T	C	T	C
AX-94668573	T/C	1A	523941490	+	NA	NA	NA	NA	NA	NA	T	T	T	C	T	T	C	T	T	T	T	T	C	C	C	Y	T	T	T	C	C	T	C	T	T	T	C	T	T	T	T	T	T	N	C	T	T	C	T
AX-95630468	T/C	1A	523941490	+	NA	NA	NA	NA	NA	NA	T	T	T	C	T	T	C	T	T	T	T	T	C	C	C	N	T	T	T	C	C	T	N	T	T	T	C	T	T	T	N	T	T	T	C	T	T	C	T
AX-94624955	T/C	1A	523941704	+	NA	NA	NA	NA	NA	NA	T	T	T	C	T	T	C	T	T	T	T	T	C	Y	Y	Y	T	T	T	Y	C	T	Y	T	T	T	C	T	Y	T	T	T	T	T	C	T	T	C	T
AX-110622902	G/A	1A	523941867	+	NA	NA	NA	NA	NA	NA	G	G	A	G	G	G	G	A	G	A	A	G	G	G	G	G	A	R	G	G	G	A	G	A	A	A	G	A	G	A	A	G	A	A	G	G	A	G	A
AX-109829299	T/C	1A	523946577	+	NA	NA	NA	NA	NA	NA	T	T	T	T	T	T	T	C	T	C	C	T	T	T	T	T	C	Y	T	T	T	C	T	C	C	C	T	C	T	C	C	T	C	C	T	T	C	T	C
AX-108867207	A/T	1A	523948239	+	NA	NA	NA	NA	NA	NA	N	A	T	A	A	A	A	T	A	T	T	A	A	A	A	A	T	T	A	A	A	N	A	T	T	T	N	T	A	T	T	A	T	T	A	A	T	A	T
AX-110569333	C/T	1A	523954256	+	NA	NA	NA	NA	NA	NA	C	C	T	C	C	C	C	T	C	T	T	C	C	C	C	C	T	N	C	C	C	T	C	T	T	T	C	T	C	T	T	C	T	T	C	C	T	C	T
AX-95001649	G/A	1A	524158521	+	NA	NA	NA	NA	NA	NA	A	A	G	R	A	A	G	R	A	G	R	G	R	R	R	R	R	G	R	R	G	R	R	R	G	G	G	R	G	R	R	G	R	R	G	R	R	R	R
AX-111686031	G/C	1A	524439064	+	NA	NA	NA	NA	NA	NA	C	C	C	G	C	C	G	G	C	G	G	G	G	G	G	S	G	G	G	G	G	G	G	G	G	G	G	G	G	G	G	G	G	G	G	G	G	G	G
AX-108777476	G/A	1A	524453862	+	NA	NA	NA	NA	NA	NA	A	A	A	G	A	A	G	A	A	A	A	G	G	G	G	R	G	R	G	G	G	A	G	A	A	A	G	G	A	G	G	G	A	A	G	G	A	G	A
AX-109935443	A/G	1A	525547310	+	NA	NA	NA	NA	NA	NA	R	R	G	A	G	G	A	G	G	G	G	A	A	A	A	A	A	R	A	A	A	R	A	R	G	G	A	A	R	A	A	A	G	R	A	A	G	A	R
AX-94583358	C/T	1A	525553776	+	NA	NA	NA	NA	NA	NA	C	Y	T	C	C	C	C	C	C	C	C	C	C	C	C	C	C	C	C	C	T	C	C	C	C	C	C	C	C	C	C	C	C	C	T	C	C	C	C
AX-110576513	T/C	1A	525566191	+	NA	NA	NA	NA	NA	NA	C	C	C	T	C	C	T	C	C	C	C	T	T	T	T	Y	T	Y	T	T	T	C	T	C	C	C	T	T	C	T	T	T	C	C	T	T	C	T	C
AX-108768356	G/T	1A	525567669	+	NA	NA	NA	NA	NA	NA	K	K	T	G	T	T	G	T	T	T	T	G	G	G	G	G	G	T	G	G	G	K	G	K	T	T	G	G	K	G	G	G	T	K	G	G	T	G	K
AX-111159498	T/A	1A	525575468	+	NA	NA	NA	NA	NA	NA	A	A	A	T	A	A	T	A	A	A	A	T	T	T	T	T	T	W	T	T	T	A	T	A	A	A	T	T	A	T	T	T	A	A	T	T	A	T	A
AX-94964616	C/T	1A	525587187	+	NA	NA	NA	NA	NA	NA	T	Y	T	C	Y	T	C	T	T	T	T	C	C	C	C	Y	C	Y	C	C	C	T	C	T	T	T	C	C	C	C	C	C	T	T	C	C	T	C	N
AX-179558199	C/T	1A	525652976	+	NA	NA	NA	NA	NA	NA	T	T	T	C	T	T	C	T	T	T	T	C	C	C	C	Y	C	Y	C	C	C	T	C	T	T	T	C	C	T	C	C	C	T	T	C	C	T	C	T
AX-95630765	C/T	1A	525652976	+	NA	NA	NA	NA	NA	NA	T	T	T	C	T	T	C	T	T	T	T	C	C	C	C	Y	C	Y	C	C	C	T	C	T	T	T	C	C	T	C	C	C	T	T	C	C	T	C	T
AX-179559752	G/A	1A	525654160	+	NA	NA	NA	NA	NA	NA	R	R	N	G	A	A	G	A	R	R	A	G	G	G	G	R	G	G	G	G	G	R	G	R	A	R	G	G	G	G	G	G	A	R	G	G	A	G	R
AX-94423125	G/A	1A	525654160	+	NA	NA	NA	NA	NA	NA	A	R	N	G	A	A	G	A	A	A	A	G	G	G	G	R	G	R	G	G	G	A	G	A	A	A	G	G	G	G	G	G	A	A	G	G	A	G	A
AX-94437971	C/T	1A	525654471	+	NA	NA	NA	NA	NA	NA	T	N	T	C	T	T	C	T	T	T	T	C	C	C	C	Y	C	Y	C	C	C	T	C	T	T	T	C	C	C	C	C	C	T	T	C	C	T	C	T
AX-95207652	T/C	1A	525660895	+	NA	NA	NA	NA	NA	NA	C	C	C	T	C	C	T	C	C	C	C	T	T	T	T	N	T	Y	T	T	T	C	T	C	C	C	T	T	N	T	T	T	C	C	T	T	C	T	C
AX-95631698	T/C	1A	525660895	+	NA	NA	NA	NA	NA	NA	C	C	C	T	C	C	T	C	C	C	C	T	T	T	T	N	T	Y	T	T	T	C	T	C	C	C	T	T	Y	T	T	T	C	C	T	T	C	T	C
AX-179558200	C/T	1A	525661559	+	NA	NA	NA	NA	NA	NA	T	T	T	C	T	T	C	T	T	T	T	C	C	C	C	N	C	Y	C	C	C	T	C	T	T	T	C	C	Y	C	C	C	T	T	C	C	T	C	T
AX-95630766	C/T	1A	525661559	+	NA	NA	NA	NA	NA	NA	T	T	T	C	T	T	C	T	T	T	T	C	C	C	C	N	C	N	C	C	C	T	C	T	T	T	C	C	N	C	C	C	T	T	C	C	T	C	T
AX-179560145	G/A	1A	525662325	+	NA	NA	NA	NA	NA	NA	A	A	A	G	A	A	G	A	A	A	A	G	G	G	G	N	G	R	G	G	G	A	G	A	A	A	G	G	R	G	G	G	A	A	G	G	A	G	A
AX-95659332	G/A	1A	525662325	+	NA	NA	NA	NA	NA	NA	A	A	A	G	A	A	G	A	A	A	A	G	G	G	G	R	G	R	G	G	G	A	G	A	A	A	G	G	N	G	G	G	A	A	G	G	A	G	A
AX-111498332	T/C	1A	525692791	+	NA	NA	NA	NA	NA	NA	C	C	C	T	C	C	T	C	C	C	C	T	T	T	T	T	T	Y	T	T	T	C	T	C	C	C	T	T	Y	T	T	T	C	C	T	T	C	T	C
AX-94634012	T/C	1A	525695753	+	NA	NA	NA	NA	NA	NA	T	Y	C	T	C	T	T	T	T	T	T	T	T	T	T	T	T	T	T	T	C	T	T	T	T	T	T	T	Y	T	T	T	T	T	C	T	T	T	T
AX-95094324	C/A	1A	527714841	+	NA	NA	NA	NA	NA	NA	A	M	C	C	A	A	C	C	A	C	C	C	C	C	C	M	C	C	N	C	C	C	A	C	C	C	C	C	C	C	C	C	C	C	C	C	C	C	C
AX-109485793	T/G	1A	528625701	+	NA	NA	NA	NA	NA	NA	G	G	G	K	G	G	T	K	G	T	K	G	K	T	G	K	T	T	G	T	K	T	G	T	T	T	G	T	G	K	T	T	K	T	K	T	K	K	T
AX-108929920	T/C	1A	528771248	+	NA	NA	NA	NA	NA	NA	Y	T	C	T	C	C	T	C	T	C	C	C	T	T	Y	T	T	N	T	T	T	Y	T	Y	C	C	T	T	T	T	T	T	C	Y	T	T	C	T	Y
AX-111509527	T/G	1A	528783333	+	NA	NA	NA	NA	NA	NA	G	T	G	T	T	G	T	G	T	G	G	G	T	T	G	T	T	K	T	T	T	G	T	G	G	G	T	T	T	T	T	T	T	G	T	T	G	T	G
AX-108819000	T/C	1A	528783701	+	NA	NA	NA	NA	NA	NA	C	T	C	T	T	C	T	C	T	C	C	N	T	T	C	T	T	Y	T	T	T	C	T	C	C	C	T	T	T	T	T	T	T	C	T	T	C	T	C
AX-89521712	C/T	1A	528792121	+	NA	NA	NA	NA	NA	NA	T	C	T	C	C	T	C	T	C	T	T	T	C	C	T	C	C	Y	T	C	C	T	C	T	T	T	T	C	T	C	C	C	C	T	C	C	T	C	T
AX-179558292	T/C	1A	528800372	+	NA	NA	NA	NA	NA	NA	C	T	C	T	T	C	T	C	T	C	C	C	T	T	C	T	T	Y	C	T	T	C	T	C	C	C	T	T	T	T	T	T	T	C	T	T	C	T	C
AX-94856268	C/T	1A	528800760	+	NA	NA	NA	NA	NA	NA	Y	Y	C	C	C	C	C	C	C	C	C	C	C	Y	Y	Y	Y	C	T	Y	T	Y	Y	N	T	N	C	Y	T	C	Y	T	T	Y	T	T	C	T	Y
AX-111023601	T/C	1A	528804041	+	NA	NA	NA	NA	NA	NA	C	T	C	T	T	C	T	C	T	C	C	C	T	T	C	T	T	Y	C	T	T	C	T	C	C	C	T	T	T	T	T	T	T	C	T	T	C	T	C
AX-94508777	C/T	1A	528804217	+	NA	NA	NA	NA	NA	NA	T	C	T	C	C	T	C	T	C	T	T	T	C	C	T	C	C	Y	T	C	C	T	C	T	T	T	C	C	C	C	C	C	C	T	C	C	T	C	T
AX-109300073	G/A	1A	529038551	+	NA	NA	NA	NA	NA	NA	G	G	G	G	G	G	G	G	G	G	G	G	G	G	G	G	R	R	G	G	G	G	G	G	G	G	G	R	G	A	R	A	G	G	G	R	G	G	G
AX-111507428	G/A	1A	529101841	+	NA	NA	NA	NA	NA	NA	A	A	A	G	A	A	G	G	A	G	G	G	G	G	G	R	G	G	G	G	G	G	G	G	G	G	A	G	G	G	G	G	A	G	G	G	G	G	G
AX-109830881	C/T	1A	529141725	+	NA	NA	NA	NA	NA	NA	T	N	T	C	T	T	C	C	T	C	C	C	C	C	C	Y	C	C	C	C	C	C	C	C	C	C	T	C	C	C	C	C	T	C	C	C	C	C	C
AX-179475403	T/C	1A	529582897	+	NA	NA	NA	NA	NA	NA	T	T	T	C	T	T	C	T	T	T	T	C	C	C	C	Y	T	T	C	C	C	T	T	T	T	T	T	T	T	T	T	T	T	T	C	T	T	C	T
AX-179557365	T/C	1A	529582897	+	NA	NA	NA	NA	NA	NA	T	T	T	C	T	T	C	T	T	T	T	C	C	Y	Y	Y	T	T	Y	Y	C	T	T	T	T	T	T	T	T	T	T	T	T	T	C	T	T	C	T
AX-94426657	A/G	1A	529614445	+	NA	NA	NA	NA	NA	NA	G	G	G	G	G	G	G	A	G	A	A	G	G	G	G	G	A	A	G	G	G	A	A	A	A	A	A	A	A	A	A	A	G	A	G	A	A	G	A
AX-94412484	C/G	1A	529629404	+	NA	NA	NA	NA	NA	NA	C	C	C	C	C	C	C	C	C	C	C	C	C	C	C	C	C	C	S	C	S	C	C	N	G	C	C	C	S	C	C	G	S	C	S	S	C	S	C
AX-86162289	G/A	1A	529630683	+	NA	NA	NA	NA	NA	NA	G	G	G	A	G	G	A	G	G	G	G	A	N	A	A	R	G	G	A	A	A	G	G	G	G	G	G	G	G	G	G	G	G	G	A	G	G	A	G
AX-86162290	G/A	1A	529630683	+	NA	NA	NA	NA	NA	NA	G	G	G	A	G	G	A	G	G	G	G	A	A	R	R	R	G	G	R	R	A	G	G	G	G	G	G	G	G	G	G	G	G	G	A	G	G	A	G
AX-111787913	T/C	1A	530161687	+	NA	NA	NA	NA	NA	NA	C	C	T	T	C	C	T	T	C	T	T	T	T	T	T	Y	T	T	T	T	T	T	C	T	T	T	C	T	T	T	T	T	C	T	T	T	T	T	T
AX-109961413	G/A	1A	530189786	+	NA	NA	NA	NA	NA	NA	A	A	G	G	A	A	G	G	A	G	G	G	G	G	G	R	G	G	G	G	G	G	A	G	G	G	A	G	G	G	G	G	A	G	G	G	G	G	G
AX-109458415	C/T	1A	530310275	+	NA	NA	NA	NA	NA	NA	C	C	Y	C	C	C	C	T	C	T	T	C	C	C	C	C	T	T	C	C	C	T	C	T	T	T	C	T	T	T	T	T	C	T	C	T	T	C	T
AX-110394578	C/T	1A	530579385	+	NA	NA	NA	NA	NA	NA	Y	Y	C	T	T	T	T	C	T	C	C	T	T	T	T	T	C	C	T	T	T	C	Y	C	C	C	T	C	C	C	C	C	T	C	T	C	C	T	C
AX-111463705	G/A	1A	530585954	+	NA	NA	NA	NA	NA	NA	A	A	G	A	A	A	A	G	A	G	G	A	A	A	A	A	G	G	A	A	A	G	G	G	G	G	G	G	G	G	G	G	A	G	A	G	G	A	G
AX-111691603	T/C	1A	530810887	+	NA	NA	NA	NA	NA	NA	C	C	C	C	C	C	C	T	C	T	T	C	C	C	C	C	T	T	C	C	C	T	T	T	T	T	T	T	T	T	T	T	C	T	C	T	T	C	T
AX-94599588	A/G	1A	530815323	+	NA	NA	NA	NA	NA	NA	R	R	A	A	A	A	A	A	A	A	A	A	A	R	R	N	R	A	G	R	N	R	N	N	G	A	A	R	R	A	R	G	G	R	G	G	A	G	R
AX-94423414	C/T	1A	530860966	+	NA	NA	NA	NA	NA	NA	Y	Y	T	T	T	T	T	C	T	C	C	T	T	Y	Y	Y	C	C	Y	Y	T	C	Y	C	C	C	T	C	C	C	C	N	T	C	T	C	C	T	C
AX-95630058	T/C	1A	530860966	+	NA	NA	NA	NA	NA	NA	T	T	T	T	T	T	T	C	T	C	C	T	T	T	T	T	C	C	T	T	T	C	T	C	C	C	T	C	C	C	C	C	T	C	T	C	C	T	C
AX-179557642	A/C	1A	530861001	+	NA	NA	NA	NA	NA	NA	M	M	C	C	C	C	C	A	C	A	A	C	C	M	M	M	A	A	M	M	C	A	M	A	A	A	C	A	A	A	A	A	C	A	C	A	A	C	A
AX-94520804	A/C	1A	530861001	+	NA	NA	NA	NA	NA	NA	M	M	C	C	C	C	C	A	C	A	A	C	C	M	M	M	A	A	M	M	C	A	M	A	A	A	C	A	A	A	A	A	C	A	C	A	A	C	A
AX-94403165	G/C	1A	530885032	+	NA	NA	NA	NA	NA	NA	G	G	G	G	G	G	G	G	G	G	G	G	G	G	G	G	G	G	G	G	G	G	G	G	C	G	G	G	G	G	G	G	C	G	G	G	G	C	G
AX-109286062	G/A	1A	531225380	+	NA	NA	NA	NA	NA	NA	G	G	G	G	G	G	G	G	G	G	G	G	G	G	G	G	G	G	G	G	G	G	G	G	A	G	G	G	G	G	G	G	A	G	G	G	G	A	G
AX-111761395	C/T	1A	531260050	+	NA	NA	NA	NA	NA	NA	C	C	C	C	C	C	C	T	C	T	T	C	C	C	C	C	N	N	C	C	C	Y	C	T	T	T	C	T	T	T	T	N	C	T	C	N	T	C	T
AX-110393779	A/C	1A	531260990	+	NA	NA	NA	NA	NA	NA	A	A	A	A	A	A	A	C	A	C	C	A	A	A	A	A	C	C	A	A	A	C	A	C	C	C	A	C	C	C	C	C	A	C	A	C	C	A	C
AX-95137011	C/A	1A	533431520	+	NA	NA	NA	NA	NA	NA	C	C	A	C	C	C	C	A	C	A	A	C	C	C	C	C	A	A	C	C	C	A	C	A	A	A	C	A	A	A	A	A	C	A	C	A	A	C	A
AX-110933067	C/G	1A	535187767	+	NA	NA	NA	NA	NA	NA	C	C	C	C	C	C	C	C	C	C	C	C	C	C	C	C	C	C	C	C	C	C	G	C	C	C	G	C	C	C	C	C	C	C	C	C	C	C	C
AX-95629819	C/T	1A	535455301	+	NA	NA	NA	NA	NA	NA	C	C	C	C	C	C	C	C	C	C	C	C	C	C	C	C	C	C	C	C	C	C	Y	C	C	C	T	C	C	C	C	C	C	C	C	C	C	C	C
AX-111702009	A/T	1A	535677518	+	NA	NA	NA	NA	NA	NA	T	T	A	T	T	T	T	A	T	A	A	T	T	T	T	T	A	A	T	T	T	A	N	A	A	A	T	A	A	A	A	A	T	A	T	A	A	T	A
AX-109435199	T/C	1A	536245655	+	NA	NA	NA	NA	NA	NA	C	C	T	C	C	C	C	T	C	T	T	C	C	C	C	C	T	T	C	C	C	T	T	T	T	T	T	T	T	T	T	C	C	T	C	T	T	C	T
AX-109829869	G/T	1A	536246365	+	NA	NA	NA	NA	NA	NA	T	T	G	T	T	T	T	G	T	G	G	T	T	T	T	T	G	G	T	T	T	G	G	G	G	G	G	G	G	G	G	T	T	G	T	G	G	T	G
AX-110434499	T/C	1A	536247607	+	NA	NA	NA	NA	NA	NA	Y	Y	T	C	C	C	C	T	C	T	T	C	C	Y	Y	Y	T	T	Y	Y	C	T	T	T	T	T	T	T	T	T	T	C	C	T	C	T	T	C	T
AX-86175236	C/T	1A	536255098	+	NA	NA	NA	NA	NA	NA	C	C	T	C	C	C	C	T	C	T	T	C	C	C	C	C	T	T	C	C	C	T	C	T	T	T	C	T	N	T	T	C	C	T	C	T	T	C	T
AX-95146951	A/G	1A	536258468	+	NA	NA	NA	NA	NA	NA	G	G	A	G	G	G	G	A	G	A	A	G	G	G	G	G	A	A	G	G	G	A	A	A	A	A	A	A	N	A	A	G	G	A	G	A	A	G	A
AX-109332434	G/A	1A	536258995	+	NA	NA	NA	NA	NA	NA	A	A	G	A	A	A	A	G	A	G	G	A	A	A	A	A	G	G	A	A	A	G	G	G	G	G	G	G	G	G	G	A	A	G	A	G	G	A	G
AX-109821613	C/T	1A	536365005	+	NA	NA	NA	NA	NA	NA	T	T	C	T	T	T	T	C	T	C	C	T	T	T	T	T	C	C	T	T	T	C	C	C	C	C	C	C	C	C	C	T	T	C	T	C	C	T	C
AX-94794804	T/C	1A	536368474	+	NA	NA	NA	NA	NA	NA	T	T	T	T	T	T	T	T	T	T	T	T	T	T	T	T	T	T	T	T	Y	N	N	Y	T	T	T	T	T	T	T	Y	T	T	Y	C	T	T	T
AX-108806669	T/C	1A	536562046	+	NA	NA	NA	NA	NA	NA	C	C	T	C	C	C	C	T	C	T	T	C	C	C	C	C	T	T	C	C	C	T	T	T	T	T	T	T	T	T	T	C	C	T	C	T	T	C	T
AX-109515934	T/A	1A	536737609	+	NA	NA	NA	NA	NA	NA	W	W	T	A	A	A	A	T	A	T	T	A	A	W	W	W	T	T	W	W	A	T	T	T	T	T	T	T	T	T	T	A	A	T	A	T	T	A	T
AX-109305605	T/C	1A	536844034	+	NA	NA	NA	NA	NA	NA	C	C	T	C	C	C	C	T	C	T	T	C	C	C	C	C	T	T	C	C	C	T	N	T	T	T	T	T	T	T	T	C	C	T	C	T	T	C	N
AX-108843084	A/G	1A	536898564	+	NA	NA	NA	NA	NA	NA	G	G	A	G	G	G	G	A	G	A	A	G	G	G	G	G	A	A	G	G	G	A	A	A	A	A	A	A	A	A	A	G	G	A	G	A	A	G	A
AX-110065160	G/A	1A	536901209	+	NA	NA	NA	NA	NA	NA	N	A	G	A	A	A	A	G	A	G	G	A	A	A	A	A	G	G	A	A	A	G	G	G	G	G	G	G	G	G	G	A	A	G	A	G	G	A	G
AX-95260861	G/T	1A	536906858	+	NA	NA	NA	NA	NA	NA	G	T	T	G	T	G	G	G	G	G	G	G	G	G	G	G	G	G	G	G	T	G	G	G	G	G	G	G	T	G	G	G	G	G	T	G	G	G	G
AX-179475921	A/C	1A	536910227	+	NA	NA	NA	NA	NA	NA	M	M	A	C	C	C	N	A	N	A	A	C	C	M	M	M	A	A	M	M	C	A	A	A	A	A	A	A	A	A	A	A	C	A	C	A	A	C	A
AX-110023564	T/C	1A	537207114	+	NA	NA	NA	NA	NA	NA	C	C	T	C	C	C	C	T	C	T	T	C	C	C	C	C	T	T	C	C	C	T	T	T	T	T	T	T	T	T	T	T	C	T	C	T	T	C	T
AX-111675005	A/G	1A	537471868	+	NA	NA	NA	NA	NA	NA	R	R	A	G	G	G	G	A	G	A	A	G	G	R	R	R	A	A	R	R	G	A	R	A	A	A	G	A	A	A	A	A	G	A	G	A	A	G	A
AX-178066332	C/T	1A	538076871	+	NA	NA	NA	NA	NA	NA	C	C	C	T	C	C	T	C	C	C	C	T	T	T	T	Y	C	C	T	T	T	C	T	C	C	C	C	C	C	C	C	C	C	C	T	C	C	T	C
AX-94492604	T/C	1A	538076871	+	NA	NA	NA	NA	NA	NA	Y	C	N	T	C	C	T	C	C	C	C	T	T	T	T	Y	Y	C	T	T	T	Y	T	Y	C	C	C	Y	C	C	Y	C	C	Y	T	Y	C	T	Y
AX-179475480	T/G	1A	538447708	+	NA	NA	NA	NA	NA	NA	T	T	T	G	T	T	G	T	T	T	T	G	G	G	G	K	T	T	G	G	G	T	G	T	T	T	T	T	T	T	T	T	T	T	G	T	T	G	T
AX-94960090	T/G	1A	538447708	+	NA	NA	NA	NA	NA	NA	T	T	T	G	T	T	G	T	T	T	T	G	G	G	G	K	T	T	G	G	G	T	G	T	T	T	T	K	T	T	T	T	T	T	G	T	T	G	T
AX-109900099	A/C	1A	538450657	+	NA	NA	NA	NA	NA	NA	A	A	A	C	A	A	C	A	A	A	A	C	C	C	C	M	A	A	C	C	C	A	C	A	A	A	A	A	A	A	A	A	A	A	C	A	A	C	A
AX-94504454	G/T	1A	538476738	+	NA	NA	NA	NA	NA	NA	G	G	G	T	G	G	T	G	G	G	G	T	T	T	T	K	G	G	T	T	T	G	T	G	G	G	G	G	G	G	G	G	G	G	T	G	G	T	G
AX-111497715	C/T	1A	538483443	+	NA	NA	NA	NA	NA	NA	C	C	C	T	C	C	T	C	C	C	C	T	T	Y	Y	Y	C	C	Y	Y	T	C	Y	C	C	C	C	C	C	C	C	C	C	C	T	C	C	T	C
AX-86174196	C/T	1A	538485203	+	NA	NA	NA	NA	NA	NA	C	C	C	T	C	C	T	C	N	C	C	T	T	Y	Y	N	C	C	Y	Y	T	C	Y	C	C	C	C	C	C	C	C	C	C	C	T	C	C	T	C
AX-86176249	C/T	1A	538511942	+	NA	NA	NA	NA	NA	NA	C	C	C	T	C	C	Y	C	C	C	C	Y	T	Y	Y	C	C	C	Y	Y	T	C	Y	C	C	C	C	C	C	C	C	C	C	C	T	C	C	T	C
AX-95684431	T/C	1A	538515688	+	NA	NA	NA	NA	NA	NA	T	Y	T	C	N	T	N	T	T	T	T	C	C	C	C	Y	T	T	C	C	C	T	Y	T	T	T	T	T	N	T	T	T	T	T	C	T	T	C	T
AX-110968221	T/C	1A	538918986	+	NA	NA	NA	NA	NA	NA	T	T	T	T	T	T	C	T	T	T	T	T	T	T	T	T	T	T	T	T	T	T	T	T	T	C	T	T	T	T	T	T	T	T	T	T	T	T	T
AX-179558650	A/G	1A	539822082	+	NA	NA	NA	NA	NA	NA	A	A	N	G	A	A	G	A	A	A	A	A	G	G	G	R	G	A	G	G	G	A	G	A	A	G	A	G	A	G	G	A	G	A	G	A	A	G	A
AX-89467957	A/G	1A	539822082	+	NA	NA	NA	NA	NA	NA	A	A	G	G	A	A	G	A	A	A	A	A	G	G	G	R	G	A	G	G	G	A	G	A	A	G	A	G	A	G	G	A	G	A	G	A	A	G	A
AX-109314207	A/G	1A	540090732	+	NA	NA	NA	NA	NA	NA	G	N	A	A	G	G	A	G	G	G	G	A	A	A	A	R	A	R	G	A	A	N	R	G	G	A	G	A	A	A	A	G	G	G	A	A	G	A	G
AX-110909710	C/T	1A	540429892	+	NA	NA	NA	NA	NA	NA	C	C	C	T	C	C	C	C	C	C	C	T	C	T	C	T	T	C	C	C	C	C	T	C	T	T	C	T	N	T	T	C	T	T	C	C	C	T	T
AX-89645960	A/G	1A	540985011	+	NA	NA	NA	NA	NA	NA	G	G	G	G	G	G	A	G	G	A	G	G	G	G	A	G	A	A	A	A	A	A	G	A	A	A	G	A	G	A	A	A	G	A	A	A	A	A	A
AX-111982285	C/T	1A	540986238	+	NA	NA	NA	NA	NA	NA	T	T	C	T	T	T	C	T	T	C	T	N	T	T	C	T	C	C	C	C	C	C	T	C	C	C	T	C	C	C	C	C	T	C	C	C	C	C	C
AX-179476653	C/T	1A	540986238	+	NA	NA	NA	NA	NA	NA	T	T	C	T	T	T	C	T	T	C	T	N	T	T	C	T	C	C	C	C	C	C	T	C	C	C	T	C	C	C	C	C	T	C	C	C	C	C	C
AX-108844201	C/A	1A	541011397	+	NA	NA	NA	NA	NA	NA	A	A	C	M	A	A	C	A	A	C	A	C	M	M	C	M	C	C	C	C	C	C	N	C	C	C	M	C	M	C	C	C	C	C	C	C	C	C	N
AX-94440483	A/T	1A	541046867	+	NA	NA	NA	NA	NA	NA	A	A	A	A	A	A	A	A	A	T	A	A	A	A	A	A	T	T	T	T	A	T	A	T	T	A	A	T	A	T	T	T	T	T	A	T	T	T	T
AX-110640142	T/C	1A	541159920	+	NA	NA	NA	NA	NA	NA	T	T	C	T	T	T	T	T	T	C	T	T	T	T	T	T	C	C	C	C	T	C	T	C	C	T	Y	C	N	C	C	C	C	C	T	C	C	C	C
AX-95679746	T/C	1A	541159920	+	NA	NA	NA	NA	NA	NA	T	T	C	T	T	T	T	T	T	C	T	T	T	T	T	T	C	C	C	C	T	C	T	C	C	T	T	C	Y	C	C	C	C	C	T	C	C	C	C
AX-108974321	G/A	1A	541160237	+	NA	NA	NA	NA	NA	NA	G	G	G	G	G	G	G	G	G	A	G	G	G	G	G	G	A	A	A	A	G	A	G	A	A	G	G	A	G	A	A	A	A	A	G	A	A	A	A
AX-179475402	C/T	1A	541368873	+	NA	NA	NA	NA	NA	NA	T	T	C	T	T	T	T	T	T	C	T	T	T	T	T	T	C	C	C	C	T	C	T	C	C	T	T	C	N	C	C	C	C	C	T	C	C	C	C
AX-94390717	C/T	1A	541368873	+	NA	NA	NA	NA	NA	NA	T	T	C	T	T	T	T	T	T	C	T	T	T	T	T	T	C	C	C	C	T	C	T	C	C	T	T	C	Y	C	C	C	C	C	T	C	C	C	C
AX-94978499	C/T	1A	541375865	+	NA	NA	NA	NA	NA	NA	C	C	C	C	C	C	C	C	C	C	C	C	C	C	C	C	C	C	T	N	T	C	T	N	C	C	C	C	C	C	C	T	C	C	T	T	C	C	C
AX-179475470	A/G	1A	541680590	+	NA	NA	NA	NA	NA	NA	G	G	G	G	G	G	G	G	G	A	G	G	G	G	G	G	A	A	A	A	G	A	G	A	A	G	G	A	R	A	A	A	A	A	G	A	A	A	A
AX-95652758	A/G	1A	541680590	+	NA	NA	NA	NA	NA	NA	G	G	G	G	G	G	G	G	G	A	G	G	G	G	G	G	A	A	A	A	G	A	G	A	A	G	G	A	R	A	A	A	A	A	G	A	A	A	A
AX-94633666	G/C	1A	541683245	+	NA	NA	NA	NA	NA	NA	C	G	G	C	C	C	C	C	C	G	C	C	C	C	C	C	C	N	G	G	G	G	G	G	C	C	G	C	G	C	C	G	C	C	G	G	G	C	C
AX-95189966	C/T	1A	541683669	+	NA	NA	NA	NA	NA	NA	T	T	C	C	T	T	C	T	T	T	T	C	C	C	C	C	C	T	T	C	C	T	C	T	T	C	C	C	C	C	C	C	T	C	C	C	T	C	N
AX-111617327	G/A	1A	541974498	+	NA	NA	NA	NA	NA	NA	A	A	G	A	A	A	G	A	A	G	A	N	A	A	G	A	A	G	G	G	G	G	G	G	G	G	G	A	G	A	A	G	G	G	G	G	G	A	G
AX-179559369	T/C	1A	542133078	+	NA	NA	NA	NA	NA	NA	T	T	T	T	T	T	T	T	T	C	T	T	T	T	T	T	T	C	C	C	T	C	T	C	C	T	T	T	N	T	T	C	C	C	T	C	C	T	C
AX-95661721	T/C	1A	542133078	+	NA	NA	NA	NA	NA	NA	T	T	N	T	T	T	T	T	T	C	T	T	T	T	T	T	T	C	C	C	T	C	T	C	C	T	T	T	Y	T	T	C	C	C	T	C	C	T	C
AX-112286487	A/G	1A	542133855	+	NA	NA	NA	NA	NA	NA	A	A	A	A	A	A	A	A	A	G	A	A	A	A	A	A	A	G	R	R	A	R	A	R	G	N	A	A	A	A	A	G	G	R	A	R	G	A	R
AX-179559913	A/G	1A	542133855	+	NA	NA	NA	NA	NA	NA	A	A	A	A	A	A	A	N	A	A	A	A	A	A	A	N	A	A	N	R	A	R	N	R	G	A	A	A	A	A	A	A	G	R	A	R	G	A	R
AX-109519932	A/G	1A	542272710	+	NA	NA	NA	NA	NA	NA	A	A	A	A	A	A	A	A	A	G	A	A	A	A	A	A	A	G	G	G	A	G	A	G	G	A	A	A	G	A	A	G	G	G	A	G	G	A	G
AX-109951432	T/G	1A	542272959	+	NA	NA	NA	NA	NA	NA	G	G	T	G	G	G	T	G	G	T	G	K	G	G	T	G	G	T	T	T	T	T	T	T	T	T	T	G	T	G	G	T	T	T	T	T	T	G	T
AX-109326239	T/C	1A	542277700	+	NA	NA	NA	NA	NA	NA	T	T	C	T	T	T	C	T	T	T	T	Y	T	T	C	T	T	T	T	T	C	T	C	T	T	C	C	T	T	T	T	T	T	Y	C	T	T	T	T
AX-109094916	G/T	1A	542290184	+	NA	NA	NA	NA	NA	NA	G	G	G	G	G	G	T	G	G	G	G	K	G	G	T	G	G	G	K	G	T	G	T	G	G	T	T	G	G	G	G	G	G	G	T	G	G	G	G
AX-109037665	C/A	1A	542325280	+	NA	NA	NA	NA	NA	NA	A	A	C	A	A	A	C	A	A	C	A	M	A	A	C	A	A	C	C	C	C	C	C	C	C	C	C	A	C	A	A	C	C	C	C	C	C	A	C
AX-110629129	G/A	1A	542507216	+	NA	NA	NA	NA	NA	NA	G	G	A	G	G	G	A	G	G	G	G	N	G	G	R	G	G	G	G	G	A	G	A	G	G	A	A	G	G	G	G	G	G	G	A	G	G	G	G
AX-94502624	C/T	1A	542507486	+	NA	NA	NA	NA	NA	NA	T	N	C	T	T	T	C	T	T	C	T	Y	T	T	C	T	T	C	C	C	C	C	C	C	C	C	C	T	C	T	T	C	C	C	C	C	C	T	C
AX-110971210	A/C	1A	542510326	+	NA	NA	NA	NA	NA	NA	M	M	A	C	C	C	A	C	C	A	C	M	C	M	A	M	M	A	A	A	A	A	A	A	A	A	A	M	A	C	M	A	A	A	A	A	A	C	A
AX-86177420	C/T	1A	542536423	+	NA	NA	NA	NA	NA	NA	C	C	T	C	C	C	C	C	C	T	C	C	C	C	C	C	C	T	T	T	C	T	C	T	T	C	C	C	T	C	C	T	T	T	C	T	T	C	T
AX-86177421	C/T	1A	542536423	+	NA	NA	NA	NA	NA	NA	C	C	T	C	C	C	C	C	C	T	C	C	C	C	C	C	C	T	T	T	C	T	C	T	T	C	C	C	T	C	C	T	T	T	C	T	T	C	T
AX-110051918	A/G	1A	542538356	+	NA	NA	NA	NA	NA	NA	A	A	A	A	A	A	A	A	A	A	A	R	A	A	A	A	A	A	A	A	A	A	G	A	A	A	A	A	A	A	A	A	A	A	A	A	A	A	A
AX-94635059	A/G	1A	542771434	+	NA	NA	NA	NA	NA	NA	G	A	G	G	G	G	G	G	G	A	G	N	G	G	G	G	G	R	A	A	A	A	A	R	G	G	A	G	G	G	G	A	G	A	A	A	A	G	A
AX-111026058	G/A	1A	543068731	+	NA	NA	NA	NA	NA	NA	G	G	G	G	G	G	G	G	G	G	G	R	G	G	G	G	G	G	G	G	G	G	A	G	G	G	G	G	N	G	G	G	G	G	G	G	G	G	G
AX-111467182	A/G	1A	543223835	+	NA	NA	NA	NA	NA	NA	A	A	G	A	A	A	A	A	A	G	A	R	A	A	A	A	G	G	G	G	A	G	G	G	G	A	A	G	G	G	G	G	G	G	A	A	G	G	G
AX-108947986	G/C	1A	543237016	+	NA	NA	NA	NA	NA	NA	G	S	G	G	G	G	G	G	G	G	G	G	G	S	G	N	G	G	G	G	G	G	C	G	G	G	G	G	G	G	G	G	G	N	G	G	G	G	G
AX-111043117	A/G	1A	543418012	+	NA	NA	NA	NA	NA	NA	A	A	G	A	A	A	A	A	A	G	A	A	A	A	A	A	G	G	G	G	A	G	G	G	G	A	A	G	G	G	G	G	G	G	A	N	G	G	G
AX-111683915	T/C	1A	543428108	+	NA	NA	NA	NA	NA	NA	T	T	C	T	T	T	T	T	T	C	T	T	T	T	T	T	N	C	C	C	T	C	C	Y	C	T	T	C	Y	C	C	C	C	Y	T	T	C	C	Y
AX-110946285	G/A	1A	543513115	+	NA	NA	NA	NA	NA	NA	A	A	G	A	A	A	G	A	A	G	A	A	A	A	G	A	G	G	G	G	G	G	G	G	G	G	A	G	G	G	G	G	G	G	G	A	G	G	G
AX-86166568	C/A	1A	543514211	+	NA	NA	NA	NA	NA	NA	A	A	A	A	A	A	C	A	A	C	A	A	A	A	C	A	C	C	C	C	C	C	C	C	C	C	A	C	C	C	C	C	C	C	C	A	C	C	C
AX-86166606	C/A	1A	543514211	+	NA	NA	NA	NA	NA	NA	A	A	A	A	A	A	C	A	A	C	A	A	A	A	C	A	C	C	C	C	C	C	C	C	C	C	A	C	C	C	C	C	C	C	C	A	C	C	C
AX-108856731	G/A	1A	543514775	+	NA	NA	NA	NA	NA	NA	G	G	G	G	G	G	A	G	G	G	G	G	G	G	A	G	G	G	G	G	A	G	A	G	G	A	G	G	G	G	G	G	G	G	A	G	G	G	G
AX-89543829	T/C	1A	543517315	+	NA	NA	NA	NA	NA	NA	T	T	T	T	T	T	C	T	T	T	T	T	T	T	C	T	C	T	T	T	C	T	C	T	T	C	T	Y	T	C	C	T	T	T	C	T	T	C	T
AX-111607850	G/A	1A	543524540	+	NA	NA	NA	NA	NA	NA	G	G	G	G	G	G	A	G	G	G	G	N	G	G	A	G	G	G	G	G	A	G	A	G	G	A	G	G	G	G	G	G	G	G	A	G	G	G	G
AX-109580770	A/G	1A	543579931	+	NA	NA	NA	NA	NA	NA	G	G	G	G	G	G	A	G	G	A	G	G	G	G	A	G	A	A	A	A	A	A	A	A	A	A	G	A	A	A	A	A	A	A	A	A	A	A	A
AX-108851435	C/T	1A	543580058	+	NA	NA	NA	NA	NA	NA	T	T	T	T	T	T	C	T	T	C	T	T	T	T	C	T	C	C	C	C	C	C	C	C	C	C	T	C	C	C	C	C	C	C	C	C	C	C	C
AX-109957442	A/C	1A	543582604	+	NA	NA	NA	NA	NA	NA	C	C	C	C	C	C	A	C	C	A	C	C	C	C	A	C	A	A	A	A	A	A	A	A	A	A	C	A	A	A	A	A	A	A	A	A	A	A	A
AX-109923808	G/A	1A	543595832	+	NA	NA	NA	NA	NA	NA	A	R	A	A	A	A	G	A	A	G	A	A	A	A	G	A	G	G	G	G	G	G	G	G	G	G	A	G	G	G	G	G	G	G	G	G	G	G	G
AX-94616748	A/T	1A	543598062	+	NA	NA	NA	NA	NA	NA	W	N	T	T	T	T	A	T	T	A	T	T	T	W	A	W	A	A	A	A	A	A	W	A	A	A	T	A	A	A	A	A	A	A	A	A	A	A	A
AX-86178735	T/C	1A	543614429	+	NA	NA	NA	NA	NA	NA	C	C	C	C	C	C	T	C	C	T	C	Y	C	C	T	C	T	T	T	T	T	T	C	T	T	T	C	T	T	T	T	T	T	T	T	C	T	T	T
AX-86178736	T/C	1A	543614429	+	NA	NA	NA	NA	NA	NA	C	C	C	C	C	C	T	C	C	T	C	C	C	C	T	C	T	T	T	T	T	T	C	T	T	T	C	Y	T	T	T	T	T	T	T	C	T	T	Y
AX-109322761	A/T	1A	543621054	+	NA	NA	NA	NA	NA	NA	A	A	A	A	A	A	T	A	A	A	A	A	A	A	T	A	A	A	A	A	T	A	A	A	A	T	A	A	A	A	A	A	A	A	T	A	A	A	A
AX-111063958	G/A	1A	543627162	+	NA	NA	NA	NA	NA	NA	G	G	A	G	G	G	A	G	G	G	G	N	G	G	A	G	G	G	G	G	A	G	G	G	G	A	G	G	G	G	G	G	G	G	A	G	G	G	G
AX-110535605	G/A	1A	543627566	+	NA	NA	NA	NA	NA	NA	G	G	G	G	G	G	A	G	G	G	G	N	G	G	A	G	G	G	G	G	A	G	G	G	G	A	G	G	G	G	G	G	G	G	A	G	G	G	G
AX-108840212	C/T	1A	543628107	+	NA	NA	NA	NA	NA	NA	C	C	C	C	C	C	T	C	C	C	C	C	C	C	T	C	C	C	C	C	T	C	C	C	C	T	C	C	C	C	C	C	C	C	T	C	C	C	C
AX-110933447	C/T	1A	543730311	+	NA	NA	NA	NA	NA	NA	C	C	C	C	C	C	T	C	C	C	C	T	C	C	T	C	T	Y	C	C	T	C	C	C	C	T	C	T	T	T	T	C	C	C	T	C	C	T	C
AX-111551125	C/T	1A	543730365	+	NA	NA	NA	NA	NA	NA	C	C	C	C	C	C	T	C	C	C	C	T	C	C	T	C	T	Y	C	C	T	C	N	C	C	T	C	T	T	T	T	C	C	C	T	C	C	T	C
AX-109482702	C/T	1A	543924245	+	NA	NA	NA	NA	NA	NA	T	T	T	T	T	T	C	T	T	C	T	C	T	T	C	T	C	C	C	C	C	C	T	C	C	C	T	C	T	C	C	C	C	C	C	T	C	C	C
AX-108745213	C/T	1A	543947443	+	NA	NA	NA	NA	NA	NA	C	C	C	C	C	C	T	C	C	C	C	T	C	C	T	C	T	Y	C	C	T	C	C	C	C	T	C	T	C	T	T	C	C	C	T	C	C	T	C
AX-111826929	G/A	1A	543976648	+	NA	NA	NA	NA	NA	NA	R	R	G	G	G	G	A	G	G	G	G	A	G	R	A	R	A	R	R	R	A	R	R	R	G	A	G	A	R	A	A	G	G	R	A	R	G	A	R
AX-110017150	G/A	1A	543998415	+	NA	NA	NA	NA	NA	NA	G	G	G	G	G	G	A	G	G	G	G	A	G	G	A	G	A	R	G	G	A	G	N	G	G	A	G	A	G	A	A	G	G	G	A	G	G	A	G
AX-108873889	C/T	1A	544120135	+	NA	NA	NA	NA	NA	NA	C	C	T	C	C	C	T	C	C	C	C	T	C	C	T	C	T	Y	C	C	T	C	C	C	C	T	C	T	C	T	T	C	C	C	T	C	C	T	C
AX-110413668	C/T	1A	544293618	+	NA	NA	NA	NA	NA	NA	C	C	C	C	C	C	T	C	C	C	C	T	C	C	T	C	T	Y	C	C	T	C	C	C	C	T	C	T	C	T	T	C	C	C	T	C	C	T	C
AX-109903014	A/C	1A	544434189	+	NA	NA	NA	NA	NA	NA	A	A	A	A	A	A	A	A	A	A	A	M	A	A	A	A	A	A	A	A	A	A	M	A	A	A	C	A	M	A	A	A	A	A	A	M	A	A	A
AX-110085969	T/C	1A	544520777	+	NA	NA	NA	NA	NA	NA	T	T	Y	T	T	T	T	T	T	T	T	T	T	T	T	T	T	T	T	T	T	T	Y	T	T	T	C	T	Y	T	T	T	T	T	T	Y	T	T	T
AX-108933189	T/C	1A	544660362	+	NA	NA	NA	NA	NA	NA	C	C	C	C	C	C	T	C	C	C	C	T	C	C	T	C	T	Y	C	C	T	C	T	C	C	T	T	T	T	T	T	C	C	C	T	T	C	T	C
AX-89675899	G/T	1A	544665805	+	NA	NA	NA	NA	NA	NA	G	G	T	G	G	G	G	G	G	T	G	G	G	G	G	G	G	K	T	T	G	T	G	T	T	G	G	G	K	G	G	T	T	T	G	G	T	G	T
AX-94650089	G/T	1A	544665805	+	NA	NA	NA	NA	NA	NA	G	G	T	G	G	G	G	G	G	T	G	G	G	G	G	G	G	T	T	T	G	T	G	T	T	G	G	G	K	G	G	T	K	T	G	G	K	G	T
AX-110422022	C/G	1A	544668908	+	NA	NA	NA	NA	NA	NA	G	G	G	G	G	G	C	G	G	G	G	C	G	G	C	G	C	S	G	G	C	N	C	G	G	C	C	C	C	C	C	G	G	G	C	C	G	C	G
AX-109540133	G/A	1A	544841795	+	NA	NA	NA	NA	NA	NA	A	A	A	A	A	A	G	A	A	A	A	G	A	A	G	A	G	R	A	A	G	A	G	A	A	G	G	N	G	G	G	A	A	A	G	G	A	G	A
AX-179558639	G/A	1A	544841795	+	NA	NA	NA	NA	NA	NA	R	R	A	A	A	A	G	A	A	A	A	G	A	R	G	R	G	R	R	R	G	R	G	R	A	G	G	G	G	G	G	A	A	R	G	G	A	G	R
AX-111018727	A/G	1A	544868603	+	NA	NA	NA	NA	NA	NA	A	A	N	A	A	A	G	A	A	A	A	A	A	A	G	A	A	A	A	A	G	A	A	A	A	G	A	A	A	A	A	A	A	A	G	A	A	A	A
AX-94453185	G/T	1A	545316170	+	NA	NA	NA	NA	NA	NA	K	K	G	G	N	K	K	G	K	G	G	G	G	G	K	G	G	G	G	G	G	G	N	G	G	K	G	G	G	G	G	G	G	G	G	G	G	G	G
AX-109286678	G/A	1A	545755650	+	NA	NA	NA	NA	NA	NA	A	A	A	G	A	A	A	A	A	G	A	G	G	G	A	R	A	R	G	G	A	G	A	G	G	A	G	A	G	A	A	G	G	G	A	G	G	G	G
AX-109466916	G/A	1A	545845508	+	NA	NA	NA	NA	NA	NA	G	G	G	G	G	G	A	G	G	G	G	N	G	G	A	G	G	R	G	G	A	G	A	G	G	A	G	G	G	G	G	G	G	G	A	G	G	G	G
AX-111548828	T/C	1A	545847454	+	NA	NA	NA	NA	NA	NA	T	T	T	T	T	T	C	T	T	T	T	T	T	T	C	T	T	Y	T	T	C	T	C	T	T	C	T	T	T	T	T	T	T	T	C	T	T	T	T
AX-109921038	C/T	1A	545851850	+	NA	NA	NA	NA	NA	NA	C	C	C	C	C	C	T	C	C	C	C	C	C	C	T	C	T	Y	C	C	T	C	T	C	C	T	C	T	C	T	T	C	C	C	T	C	C	C	C
AX-108983420	G/T	1A	546288141	+	NA	NA	NA	NA	NA	NA	G	G	G	G	G	G	T	G	G	G	G	K	G	G	T	G	G	K	G	G	T	G	K	G	G	T	G	G	G	G	G	G	G	G	T	G	G	G	G
AX-94873283	T/C	1A	547149561	+	NA	NA	NA	NA	NA	NA	C	C	C	T	C	C	C	C	C	T	C	T	T	T	C	N	C	Y	T	T	C	T	C	T	T	C	T	C	T	C	C	T	T	T	C	T	T	T	T
AX-110556831	G/C	1A	547183526	+	NA	NA	NA	NA	NA	NA	G	G	G	G	G	G	C	G	G	S	G	G	G	G	C	G	G	S	G	G	C	G	C	G	G	C	G	G	G	G	G	G	G	G	C	G	G	G	G
AX-110405773	C/T	1A	547604620	+	NA	NA	NA	NA	NA	NA	C	C	C	C	C	C	T	C	C	C	C	C	C	C	T	C	T	Y	C	C	T	C	T	C	C	T	C	T	C	T	T	C	C	C	T	C	C	C	C
AX-110977417	T/C	1A	547633770	+	NA	NA	NA	NA	NA	NA	C	C	C	T	C	C	C	C	C	T	C	T	T	T	C	N	C	T	T	T	C	T	C	T	T	C	T	C	T	C	C	T	T	T	C	T	T	T	T
AX-112285989	C/T	1A	548044489	+	NA	NA	NA	NA	NA	NA	T	N	T	C	T	T	T	T	T	C	T	C	C	C	T	Y	T	Y	C	C	T	C	N	C	C	T	C	T	C	T	T	C	C	C	T	C	C	C	C
AX-95653494	C/T	1A	548044489	+	NA	NA	NA	NA	NA	NA	T	T	T	C	T	T	T	T	T	C	T	C	C	C	T	Y	T	C	C	C	T	C	T	C	C	T	C	T	C	T	T	C	C	C	T	C	C	C	C
AX-111481900	C/T	1A	548096386	+	NA	NA	NA	NA	NA	NA	C	C	C	C	C	C	T	C	C	C	C	C	C	C	T	C	T	C	C	C	T	C	T	C	C	T	C	T	T	T	T	C	C	C	T	C	C	C	C
AX-86170726	T/C	1A	548100863	+	NA	NA	NA	NA	NA	NA	T	T	T	T	T	T	C	T	T	T	T	T	T	T	C	T	C	T	T	T	C	T	C	T	T	C	T	C	C	C	C	T	T	T	C	T	T	T	T
AX-95660473	T/C	1A	548100863	+	NA	NA	NA	NA	NA	NA	T	T	N	T	T	T	C	T	T	T	T	T	T	T	C	T	C	T	T	T	C	T	C	T	T	C	T	C	C	C	C	T	T	T	C	T	T	T	T
AX-109003150	G/A	1A	548224270	+	NA	NA	NA	NA	NA	NA	A	A	G	G	A	A	G	A	A	G	A	R	G	G	G	R	G	R	G	G	G	G	G	G	G	G	G	G	G	G	G	G	G	G	G	G	G	G	G
AX-109914567	A/G	1A	548226260	+	NA	NA	NA	NA	NA	NA	G	G	G	A	G	G	G	G	G	A	G	G	A	A	G	R	G	N	A	A	G	A	G	A	A	G	A	G	G	G	G	A	A	A	G	A	A	A	A
AX-108805479	G/A	1A	548227300	+	NA	NA	NA	NA	NA	NA	G	G	G	G	G	G	A	G	G	G	G	G	G	G	A	G	A	G	G	G	A	G	A	G	G	A	G	A	A	A	A	G	G	G	A	G	G	G	G
AX-179560655	C/A	1A	548249824	+	NA	NA	NA	NA	NA	NA	C	C	C	C	C	C	A	C	C	C	C	M	C	C	A	C	A	C	C	C	A	C	A	C	C	A	C	A	A	A	A	C	C	C	A	C	C	C	C
AX-89658718	C/A	1A	548249824	+	NA	NA	NA	NA	NA	NA	C	C	C	C	C	C	A	C	C	C	C	C	C	C	A	C	A	C	C	C	A	C	A	C	C	A	C	A	A	A	A	C	C	C	A	C	C	C	C
AX-108915357	T/C	1A	548317053	+	NA	NA	NA	NA	NA	NA	T	T	T	T	T	T	C	T	T	T	T	T	T	T	C	T	C	T	T	T	C	T	C	T	T	C	T	C	C	C	C	T	T	T	C	T	T	T	T
AX-111718893	G/A	1A	548317793	+	NA	NA	NA	NA	NA	NA	A	A	G	G	A	A	G	A	A	G	A	R	G	G	G	R	G	R	G	G	G	G	G	G	G	G	G	G	G	G	G	G	G	G	G	G	G	G	G
AX-111178724	G/A	1A	548324883	+	NA	NA	NA	NA	NA	NA	A	A	G	G	A	A	G	A	A	G	A	R	G	G	G	R	G	R	G	G	G	G	G	G	G	G	G	G	G	G	G	G	G	G	G	G	G	G	G
AX-110418379	T/C	1A	548331354	+	NA	NA	NA	NA	NA	NA	T	T	T	T	T	T	C	T	T	T	T	T	T	T	C	T	T	T	T	T	C	T	C	T	T	C	T	T	T	T	T	T	T	T	C	T	T	T	T
AX-109318363	A/G	1A	548406786	+	NA	NA	NA	NA	NA	NA	G	G	A	A	G	G	G	G	G	A	G	G	A	A	G	R	A	R	A	A	G	A	G	A	A	G	A	N	A	A	A	A	A	A	G	A	A	A	A
AX-94982916	T/C	1A	548413918	+	NA	NA	NA	NA	NA	NA	C	C	T	Y	C	C	C	C	C	T	C	Y	Y	T	C	N	T	Y	T	T	C	T	C	T	T	C	T	T	N	Y	T	T	Y	T	C	T	Y	Y	T
AX-95630789	C/T	1A	548413918	+	NA	NA	NA	NA	NA	NA	C	C	T	Y	C	C	C	C	C	T	C	N	Y	Y	C	Y	Y	N	Y	Y	C	Y	C	Y	T	C	T	Y	T	Y	Y	T	Y	Y	C	Y	Y	Y	Y
AX-109353445	T/G	1A	548504353	+	NA	NA	NA	NA	NA	NA	T	T	T	T	T	T	T	T	T	T	T	T	T	T	T	T	T	T	G	T	T	T	T	T	T	T	G	T	G	T	T	G	T	T	T	G	T	T	T
AX-110419391	C/G	1A	548539322	+	NA	NA	NA	NA	NA	NA	C	C	G	C	C	C	C	C	C	C	C	G	C	C	C	C	C	S	G	C	C	C	C	C	C	C	G	C	G	C	C	G	C	C	C	G	C	C	C
AX-108913336	T/C	1A	548701801	+	NA	NA	NA	NA	NA	NA	C	C	T	T	C	C	T	C	C	T	C	T	T	T	T	N	T	T	C	T	T	T	T	T	T	T	C	T	T	T	T	T	T	T	T	T	T	T	T
AX-108770145	T/G	1A	549000736	+	NA	NA	NA	NA	NA	NA	K	K	T	T	G	G	G	G	G	T	G	T	T	T	K	K	T	T	K	T	G	T	K	T	T	G	G	T	T	T	T	T	T	T	G	T	T	T	T
AX-109357617	G/A	1A	549006846	+	NA	NA	NA	NA	NA	NA	A	A	G	G	A	A	A	A	A	G	A	R	G	G	A	A	G	G	A	G	A	G	A	G	G	A	A	G	G	G	G	G	G	G	A	G	G	G	G
AX-108919524	T/G	1A	549008944	+	NA	NA	NA	NA	NA	NA	G	G	T	T	G	G	G	G	G	T	G	T	T	T	G	G	T	T	N	T	G	T	G	T	T	G	G	T	T	T	T	T	T	T	G	T	T	T	T
AX-109306138	T/A	1A	549057057	+	NA	NA	NA	NA	NA	NA	T	T	T	A	T	T	A	T	T	T	T	T	T	W	T	W	T	T	T	T	T	T	W	T	T	A	T	T	T	T	T	T	T	W	T	W	T	A	W
AX-94464571	T/C	1A	549968050	+	NA	NA	NA	NA	NA	NA	C	Y	T	T	C	C	C	C	C	N	C	T	T	T	C	C	T	T	C	T	C	T	Y	T	T	C	C	T	N	T	T	T	T	T	C	T	T	T	T
AX-179559867	A/G	1A	549968147	+	NA	NA	NA	NA	NA	NA	R	R	A	A	G	G	G	N	G	A	G	A	A	A	R	R	A	A	R	A	G	A	R	A	A	G	G	A	R	A	A	A	A	A	G	A	A	A	A
AX-95631691	A/G	1A	549968147	+	NA	NA	NA	NA	NA	NA	G	G	A	A	G	N	G	G	G	A	G	R	A	A	G	G	A	A	G	A	G	A	G	A	A	G	G	A	G	A	A	A	A	A	G	A	A	A	A
AX-111585441	C/T	1A	550089722	+	NA	NA	NA	NA	NA	NA	T	T	C	C	T	T	T	T	T	C	T	Y	C	C	T	T	C	C	T	C	T	C	T	C	C	T	T	C	C	C	C	C	C	C	T	C	C	C	C
AX-86164880	C/A	1A	550436905	+	NA	NA	NA	NA	NA	NA	A	A	C	C	A	A	A	A	A	C	A	C	C	C	A	A	C	C	C	C	A	C	A	C	C	A	C	C	A	C	C	C	C	C	A	C	C	C	C
AX-86164881	C/A	1A	550436905	+	NA	NA	NA	NA	NA	NA	A	A	C	C	M	A	A	M	A	C	M	C	C	C	A	A	C	C	C	C	M	C	A	C	C	A	C	C	A	C	M	C	C	C	M	C	C	C	C
AX-86165674	G/T	1A	550436998	+	NA	NA	NA	NA	NA	NA	T	T	G	G	K	T	T	K	T	G	K	G	G	G	T	T	G	G	G	G	K	G	T	G	G	T	G	K	T	G	G	G	G	G	K	G	G	G	G
AX-86165675	G/T	1A	550436998	+	NA	NA	NA	NA	NA	NA	T	T	G	G	T	T	T	T	T	G	T	G	G	G	T	T	G	G	G	G	T	G	T	G	G	T	G	G	T	G	G	G	G	G	T	G	G	G	G
AX-111043857	T/C	1A	550731162	+	NA	NA	NA	NA	NA	NA	T	T	T	C	T	T	T	T	T	C	T	T	C	C	T	T	C	Y	C	C	T	C	T	C	C	T	C	C	T	C	C	T	C	C	T	T	C	C	C
AX-108773409	T/C	1A	550732485	+	NA	NA	NA	NA	NA	NA	T	T	T	C	T	T	T	T	T	C	T	T	C	C	T	T	C	Y	C	C	T	C	T	C	C	T	C	C	T	C	C	T	C	C	T	T	C	C	C
AX-109861581	C/T	1A	550733123	+	NA	NA	NA	NA	NA	NA	C	C	C	T	C	C	C	C	C	T	C	C	T	T	C	C	T	Y	T	T	C	T	C	T	T	C	T	N	C	T	T	C	T	T	C	C	T	T	T
AX-109347921	C/T	1A	550735148	+	NA	NA	NA	NA	NA	NA	C	C	C	T	C	C	C	C	C	T	C	N	T	T	C	C	T	Y	T	T	C	T	C	T	T	C	T	T	C	T	T	C	T	T	C	C	T	T	T
AX-110986688	G/A	1A	551050351	+	NA	NA	NA	NA	NA	NA	G	G	G	A	G	G	G	G	G	A	G	G	A	A	G	G	A	R	A	A	G	A	G	A	A	G	A	A	G	A	A	G	A	A	G	G	A	A	A
AX-110469378	T/C	1A	551069621	+	NA	NA	NA	NA	NA	NA	T	T	T	C	T	T	T	T	T	C	T	T	C	C	T	T	C	Y	C	C	T	C	T	C	C	T	C	C	T	C	C	T	C	C	T	T	C	C	C
AX-112287898	A/G	1A	551127470	+	NA	NA	NA	NA	NA	NA	A	A	A	G	A	A	A	A	A	G	A	A	G	G	A	A	G	R	G	G	A	G	A	G	G	A	G	G	A	G	G	A	G	G	A	A	G	G	G
AX-111468514	T/G	1A	551175135	+	NA	NA	NA	NA	NA	NA	T	T	T	G	T	T	T	T	T	G	T	T	G	G	T	T	G	K	G	G	T	G	T	G	G	T	G	G	T	G	G	T	G	G	T	T	G	G	G
AX-109445937	C/T	1A	551376022	+	NA	NA	NA	NA	NA	NA	C	C	C	T	C	C	C	C	C	T	C	C	T	T	C	C	T	Y	T	T	C	T	C	T	T	C	T	T	C	T	T	C	T	T	C	C	T	T	T
AX-108915106	T/C	1A	551378935	+	NA	NA	NA	NA	NA	NA	T	T	T	C	T	T	T	T	T	C	T	T	C	C	T	T	C	Y	C	C	T	C	T	C	C	T	C	C	T	C	C	T	C	C	T	T	C	C	C
AX-110962071	C/T	1A	551731642	+	NA	NA	NA	NA	NA	NA	C	C	C	T	C	C	C	C	C	T	C	C	T	T	C	C	T	Y	T	T	C	N	C	T	T	C	T	T	C	T	T	C	T	T	C	C	T	T	T
AX-109003847	A/C	1A	551951348	+	NA	NA	NA	NA	NA	NA	A	A	A	C	A	A	A	A	A	C	A	A	C	C	A	A	C	M	C	C	A	C	A	C	C	A	C	C	A	C	C	A	C	C	A	A	C	C	C
AX-94417718	A/T	1A	552238901	+	NA	NA	NA	NA	NA	NA	A	A	A	T	A	A	A	A	A	T	A	A	T	T	A	A	N	N	N	W	A	W	A	T	T	A	T	W	A	T	N	A	T	N	A	A	T	A	T
AX-94749673	G/T	1A	552277347	+	NA	NA	NA	NA	NA	NA	G	G	T	T	G	G	G	G	G	T	G	G	T	K	G	G	K	N	K	K	G	K	N	K	T	G	T	K	K	T	K	G	T	K	G	G	T	G	K
AX-111228165	G/C	1A	552282497	+	NA	NA	NA	NA	NA	NA	G	S	G	G	G	G	G	G	G	G	G	G	G	G	G	G	G	G	C	G	G	G	G	G	G	G	C	G	G	G	G	G	G	G	G	G	C	G	G
AX-110404143	C/T	1A	552367521	+	NA	NA	NA	NA	NA	NA	C	C	C	C	C	C	C	C	C	C	C	C	C	C	C	C	C	C	T	C	C	C	C	C	C	C	T	C	C	C	C	C	C	C	C	C	T	C	C
AX-95226098	A/G	1A	552369623	+	NA	NA	NA	NA	NA	NA	A	A	G	G	A	A	A	A	A	G	A	A	G	G	A	A	G	R	G	G	A	G	A	G	G	A	G	G	G	G	G	A	G	G	A	A	G	A	G
AX-111174283	A/G	1A	552369663	+	NA	NA	NA	NA	NA	NA	A	A	A	A	A	A	A	A	A	A	A	A	A	A	A	A	A	A	G	A	A	A	A	A	A	A	G	A	A	A	A	A	A	A	A	A	N	A	A
AX-94773493	A/G	1A	552369663	+	NA	NA	NA	NA	NA	NA	A	A	A	A	A	A	A	A	A	A	A	A	A	A	A	A	A	A	G	A	A	A	A	A	A	A	G	A	A	A	A	A	A	A	A	A	G	A	A
AX-94467726	G/A	1A	552370606	+	NA	NA	NA	NA	NA	NA	G	G	N	A	G	G	G	G	G	A	G	G	A	A	G	G	A	R	A	A	G	A	G	A	A	G	A	A	A	A	A	G	R	A	G	G	A	G	A
AX-94400729	G/C	1A	552437025	+	NA	NA	NA	NA	NA	NA	C	C	C	S	C	C	C	C	C	G	C	G	G	S	C	C	G	G	G	G	C	G	C	G	G	C	G	S	G	S	S	S	G	G	C	G	G	S	G
AX-110492212	A/G	1A	552442536	+	NA	NA	NA	NA	NA	NA	A	A	G	A	A	A	A	A	A	A	A	A	A	A	A	A	A	A	R	A	A	A	A	A	A	A	G	A	A	A	A	A	A	A	A	A	R	A	A
AX-112286075	C/A	1A	552462595	+	NA	NA	NA	NA	NA	NA	C	C	C	A	C	C	C	C	C	A	C	M	A	A	C	C	A	A	C	A	C	A	C	A	A	C	C	A	A	A	A	A	A	A	C	A	C	A	A
AX-179560056	A/C	1A	552462595	+	NA	NA	NA	NA	NA	NA	C	C	C	A	C	C	C	C	C	A	C	M	A	A	C	C	A	A	C	A	C	A	C	A	A	C	C	A	A	A	A	A	A	A	C	A	C	A	A
AX-178066869	G/A	1A	552463958	+	NA	NA	NA	NA	NA	NA	R	R	G	G	A	A	A	A	A	G	A	G	G	G	R	R	G	N	G	G	A	G	R	G	G	A	G	G	G	G	G	G	G	G	A	G	G	G	G
AX-95652964	G/A	1A	552463958	+	NA	NA	NA	NA	NA	NA	A	A	G	G	A	A	A	A	A	G	A	N	G	G	A	A	G	G	G	G	A	G	A	G	G	A	G	G	G	G	G	G	G	G	A	G	G	G	G
AX-94532291	G/T	1A	552464095	+	NA	NA	NA	NA	NA	NA	G	G	T	G	G	G	G	G	G	G	G	N	G	G	G	G	G	G	T	G	G	G	G	G	G	G	T	G	G	G	G	G	G	G	G	G	T	G	G
AX-111640129	C/T	1A	552490972	+	NA	NA	NA	NA	NA	NA	C	C	T	T	C	C	C	C	C	T	C	C	T	T	C	C	T	Y	T	T	C	T	C	T	T	C	T	T	T	T	T	C	T	T	C	C	T	C	T
AX-94793674	T/C	1A	552648649	+	NA	NA	NA	NA	NA	NA	Y	Y	C	T	T	T	T	N	T	T	T	C	T	Y	Y	Y	Y	T	Y	Y	C	Y	N	Y	T	T	T	Y	C	T	Y	C	T	Y	C	C	T	T	Y
AX-86180342	T/C	1A	552650473	+	NA	NA	NA	NA	NA	NA	T	T	C	C	T	T	T	T	T	C	T	N	C	C	T	T	C	Y	C	C	T	C	T	C	C	T	C	C	T	C	C	T	C	C	T	T	C	T	C
AX-86180343	T/C	1A	552650473	+	NA	NA	NA	NA	NA	NA	T	T	C	C	T	T	T	T	T	C	T	Y	C	C	T	T	C	N	C	C	T	C	T	C	C	T	C	C	T	C	C	T	C	C	T	T	C	T	C
AX-95139778	C/T	1A	552663540	+	NA	NA	NA	NA	NA	NA	C	C	C	T	C	C	C	C	C	T	C	C	T	T	C	C	T	Y	T	T	C	T	Y	T	T	C	T	T	C	T	T	C	T	T	C	C	N	C	T
AX-95681740	T/C	1A	552663540	+	NA	NA	NA	NA	NA	NA	Y	Y	C	T	C	C	C	C	C	N	C	C	T	T	Y	Y	T	Y	T	T	C	T	Y	T	T	C	T	T	Y	T	T	C	T	T	C	Y	T	C	T
AX-94651424	C/T	1A	552987264	+	NA	NA	NA	NA	NA	NA	T	T	C	C	T	T	T	T	T	C	T	C	C	C	N	T	C	C	C	C	T	C	T	C	C	N	C	C	C	C	C	C	C	C	T	C	C	C	C
AX-111662237	T/G	1A	554065736	+	NA	NA	NA	NA	NA	NA	T	T	T	T	T	T	T	T	T	T	T	K	T	T	T	T	T	K	T	T	T	T	N	T	T	T	G	T	T	T	T	G	T	T	T	G	G	G	T
AX-108833986	A/T	1A	554077299	+	NA	NA	NA	NA	NA	NA	A	A	A	A	A	A	A	A	A	A	A	N	A	A	A	A	N	W	A	A	A	A	A	A	A	A	T	A	A	A	A	T	A	A	A	T	T	T	A
AX-110082485	A/G	1A	554093393	+	NA	NA	NA	NA	NA	NA	A	A	A	A	A	A	A	A	A	A	A	R	A	A	A	A	A	N	A	A	A	A	A	A	N	A	G	A	A	A	A	G	A	A	A	G	G	G	A
AX-95631864	A/G	1A	554093393	+	NA	NA	NA	NA	NA	NA	A	A	A	A	A	A	A	A	A	A	A	R	A	A	A	A	A	R	A	A	A	A	N	A	A	A	G	A	A	A	A	G	A	A	A	G	G	G	A
AX-86183918	C/A	1A	554269758	+	NA	NA	NA	NA	NA	NA	C	C	C	C	C	C	C	C	C	C	C	M	C	C	C	C	C	M	C	C	C	C	C	C	C	C	A	C	A	C	C	A	C	C	C	A	A	A	C
AX-86183919	C/A	1A	554269758	+	NA	NA	NA	NA	NA	NA	C	C	C	C	C	C	C	C	C	C	C	M	C	C	C	C	C	M	C	C	C	C	C	C	C	C	A	C	A	C	C	A	C	C	C	A	A	A	C
AX-109960530	T/G	1A	554269769	+	NA	NA	NA	NA	NA	NA	G	G	T	T	G	G	G	G	G	T	G	K	T	T	G	G	T	T	G	T	G	T	G	T	T	G	T	T	T	T	T	T	T	T	G	T	T	T	T
AX-179561132	T/G	1A	554269769	+	NA	NA	NA	NA	NA	NA	G	G	T	T	G	G	G	G	G	T	G	K	T	T	G	G	T	T	G	T	G	T	G	T	T	G	T	T	T	T	T	T	T	T	G	T	T	T	T
AX-109433430	C/T	1A	554276832	+	NA	NA	NA	NA	NA	NA	T	T	C	C	T	T	T	T	T	C	T	Y	C	C	T	T	C	C	T	C	T	C	T	C	C	T	C	C	C	C	C	C	C	C	T	C	C	C	C
AX-109031452	T/G	1A	554424168	+	NA	NA	NA	NA	NA	NA	K	K	G	G	G	G	G	G	G	G	G	T	G	K	K	K	K	N	K	K	G	K	K	K	G	G	T	K	K	G	K	T	N	K	G	T	T	T	K
AX-109406053	T/C	1A	554426035	+	NA	NA	NA	NA	NA	NA	C	C	T	T	C	C	C	C	C	T	C	N	T	T	C	C	T	T	C	T	C	T	C	T	T	C	T	T	T	T	T	T	T	T	C	T	T	T	T
AX-95653422	C/A	1A	554466688	+	NA	NA	NA	NA	NA	NA	M	M	C	C	C	A	M	C	M	C	C	C	C	C	M	M	C	C	M	C	C	C	M	C	C	M	C	C	C	C	C	C	C	C	C	C	C	C	C
AX-110530510	C/T	1A	554489280	+	NA	NA	NA	NA	NA	NA	Y	C	C	C	C	C	C	C	C	C	C	Y	C	C	C	C	C	Y	C	C	C	C	N	C	C	C	T	C	C	C	C	T	C	C	C	T	T	T	C
AX-179560876	A/G	1A	554753999	+	NA	NA	NA	NA	NA	NA	R	R	G	N	G	N	R	R	A	R	N	A	G	R	R	R	R	N	N	R	R	R	R	R	G	R	A	R	R	N	R	A	G	R	R	A	A	A	R
AX-111471091	C/T	1A	555045634	+	NA	NA	NA	NA	NA	NA	T	T	C	C	C	N	T	T	T	C	T	Y	C	C	T	T	C	C	T	C	T	C	T	C	C	T	C	C	T	C	C	C	C	C	T	C	C	C	C
AX-109382284	G/A	1A	555046754	+	NA	NA	NA	NA	NA	NA	G	G	G	G	G	G	G	G	G	G	G	R	G	G	G	G	G	R	G	G	G	G	G	G	G	G	A	G	G	G	G	A	G	G	G	A	A	A	G
AX-109951905	T/G	1A	555359692	+	NA	NA	NA	NA	NA	NA	T	K	T	T	T	T	T	T	T	N	T	K	T	T	T	T	T	K	T	T	T	T	K	T	T	T	G	T	T	T	T	G	T	T	T	G	G	G	T
AX-109900225	C/T	1A	555362806	+	NA	NA	NA	NA	NA	NA	T	T	C	C	C	T	T	T	T	C	T	Y	C	C	T	T	C	C	T	C	T	C	T	C	C	T	C	C	T	C	C	C	C	C	T	C	C	C	C
AX-108740186	A/G	1A	555364017	+	NA	NA	NA	NA	NA	NA	A	A	A	A	G	A	A	A	A	A	A	R	A	A	A	A	A	R	A	A	A	A	A	A	A	A	G	A	A	A	A	G	A	A	A	G	G	G	A
AX-111541345	G/A	1A	555376524	+	NA	NA	NA	NA	NA	NA	G	G	G	G	G	G	G	G	G	G	G	R	G	G	G	G	G	R	G	G	G	G	G	G	G	G	A	G	G	G	G	A	G	G	G	A	A	A	G
AX-111041494	T/C	1A	555725310	+	NA	NA	NA	NA	NA	NA	T	T	N	T	T	N	C	Y	T	T	Y	Y	T	T	T	N	T	T	C	T	N	T	C	T	T	C	T	T	C	T	T	T	T	T	Y	T	T	T	T
AX-179561683	T/C	1A	555725310	+	NA	NA	NA	NA	NA	NA	T	N	T	T	T	T	C	T	T	T	T	N	T	T	T	C	T	T	C	T	T	N	C	N	T	C	T	Y	C	T	N	T	T	N	T	T	T	T	Y
AX-94407377	C/G	1A	555780893	+	NA	NA	NA	NA	NA	NA	C	C	C	G	C	C	C	C	C	G	C	C	G	G	G	C	G	S	G	G	C	G	C	G	G	C	C	G	C	G	G	C	G	G	C	C	C	C	G
AX-109299553	C/T	1A	556032976	+	NA	NA	NA	NA	NA	NA	C	C	C	C	C	C	C	C	C	C	C	Y	C	C	C	C	C	Y	C	C	C	C	C	C	C	C	T	C	C	C	C	T	C	C	C	T	T	T	C
AX-111566741	C/T	1A	556068948	+	NA	NA	NA	NA	NA	NA	T	T	T	C	T	T	C	T	T	C	T	C	C	C	C	Y	T	C	C	C	C	C	T	Y	C	C	C	T	C	T	T	C	C	C	C	C	C	C	C
AX-111228672	C/T	1A	556073753	+	NA	NA	NA	NA	NA	NA	T	T	T	C	T	T	C	T	T	C	T	C	C	C	C	Y	T	C	C	C	C	C	T	Y	C	C	C	T	C	T	T	C	C	C	C	C	C	C	C
AX-109940009	A/T	1A	556160554	+	NA	NA	NA	NA	NA	NA	T	T	T	A	T	T	A	T	T	A	T	W	T	A	A	W	A	W	A	A	A	A	A	A	A	A	T	A	A	A	A	T	A	A	A	T	T	T	A
AX-111701631	C/T	1A	556167790	+	NA	NA	NA	NA	NA	NA	T	T	T	C	T	T	C	T	T	C	T	Y	T	C	C	Y	C	Y	C	C	C	C	C	C	C	C	T	C	C	C	C	T	C	C	C	T	T	T	C
AX-111136687	T/C	1A	556274318	+	NA	NA	NA	NA	NA	NA	C	C	T	T	C	C	T	C	C	T	C	Y	C	T	T	Y	T	Y	T	T	T	T	T	T	T	T	C	T	T	T	T	C	T	T	T	C	C	C	T
AX-109357769	G/T	1A	556274899	+	NA	NA	NA	NA	NA	NA	G	G	G	G	G	G	G	G	G	G	G	G	G	G	G	G	G	G	G	G	G	G	G	G	G	G	G	T	G	T	T	G	G	G	G	G	G	G	G
AX-94475367	A/G	1A	556288793	+	NA	NA	NA	NA	NA	NA	R	G	R	R	G	G	A	G	R	A	A	N	G	R	A	A	A	A	R	A	A	A	R	A	A	R	A	G	G	G	G	R	N	A	R	R	A	A	A
AX-110383419	T/C	1A	556289031	+	NA	NA	NA	NA	NA	NA	C	C	C	T	C	C	T	C	C	T	C	Y	C	T	T	Y	T	Y	T	T	T	T	T	T	T	T	C	T	T	T	T	C	T	T	T	C	C	C	T
AX-110052686	C/G	1A	556290937	+	NA	NA	NA	NA	NA	NA	C	C	C	C	C	C	G	C	C	G	C	C	C	G	G	C	G	S	G	G	C	G	C	G	G	C	C	G	C	G	G	C	G	C	C	C	C	C	C
AX-109885353	G/A	1A	556292588	+	NA	NA	NA	NA	NA	NA	G	G	G	G	G	G	A	G	G	A	G	G	G	R	A	G	A	R	A	A	G	A	G	A	A	G	G	A	R	A	A	G	A	G	G	G	G	G	G
AX-111130158	C/T	1A	556300753	+	NA	NA	NA	NA	NA	NA	C	C	C	C	C	C	T	C	C	T	C	N	C	T	T	C	T	Y	T	T	C	T	C	T	T	C	C	T	C	T	T	C	T	C	C	C	C	C	C
AX-108773722	A/G	1A	556300846	+	NA	NA	NA	NA	NA	NA	A	A	A	A	A	A	G	A	A	G	A	A	A	G	G	A	G	R	G	G	A	G	A	G	G	A	A	G	A	G	G	A	G	A	A	R	A	A	A
AX-108891843	T/C	1A	557874258	+	NA	NA	NA	NA	NA	NA	Y	Y	C	C	C	C	T	C	C	T	C	T	C	T	T	Y	T	T	T	T	C	T	Y	T	T	C	T	T	Y	T	T	T	T	Y	C	T	T	T	Y
AX-111485693	T/C	1A	557884629	+	NA	NA	NA	NA	NA	NA	C	C	C	C	C	C	T	C	C	T	C	N	C	T	T	C	T	T	T	T	C	T	C	T	T	C	T	T	C	T	T	T	T	C	C	T	T	T	C
AX-112289157	T/C	1A	558383447	+	NA	NA	NA	NA	NA	NA	T	Y	C	C	T	T	T	T	T	T	T	T	T	Y	Y	T	T	T	T	T	T	T	T	T	T	T	T	T	Y	T	T	Y	T	T	C	Y	T	T	T
AX-108853016	T/C	1A	558885534	+	NA	NA	NA	NA	NA	NA	T	T	C	T	T	T	T	T	T	T	T	T	T	T	T	T	T	T	T	T	T	T	T	T	T	T	T	C	T	C	C	T	T	T	T	T	T	T	T
AX-86174143	C/A	1A	559025038	+	NA	NA	NA	NA	NA	NA	C	C	C	A	C	C	C	C	C	C	C	C	C	A	A	C	C	C	C	C	C	C	C	C	C	C	C	C	C	C	C	A	C	C	A	A	C	C	C
AX-86174144	C/A	1A	559025038	+	NA	NA	NA	NA	NA	NA	C	C	C	A	C	C	C	C	C	C	C	C	C	M	M	C	C	C	C	C	C	C	C	C	C	C	C	C	C	C	C	A	C	C	A	M	C	C	N
AX-179560743	C/A	1A	559028674	+	NA	NA	NA	NA	NA	NA	C	A	C	C	C	C	C	C	C	C	C	C	C	C	C	C	M	C	C	C	C	C	C	C	C	C	C	M	A	C	M	C	C	C	C	C	C	C	C
AX-111053481	G/A	1A	559032155	+	NA	NA	NA	NA	NA	NA	A	A	G	G	A	A	G	A	A	G	A	G	A	G	G	R	G	G	G	G	G	G	G	G	G	G	G	A	G	A	A	G	G	G	G	G	G	G	G
AX-110623587	G/A	1A	559045322	+	NA	NA	NA	NA	NA	NA	R	R	G	G	A	A	G	A	A	G	A	G	A	G	G	G	G	G	G	G	G	G	G	G	G	G	G	R	G	N	R	G	G	G	G	G	G	G	G
AX-111215472	G/A	1A	559234698	+	NA	NA	NA	NA	NA	NA	G	G	G	G	A	G	G	G	G	G	G	G	G	G	G	G	G	G	A	G	G	G	G	G	G	G	G	A	G	A	A	G	G	G	G	G	G	G	G
AX-110450911	G/A	1A	559287781	+	NA	NA	NA	NA	NA	NA	A	A	G	G	G	A	G	A	A	G	A	R	A	G	G	N	G	R	G	G	G	G	G	G	G	G	A	G	G	G	G	A	G	G	G	A	A	A	G
AX-110927587	A/G	1A	559292393	+	NA	NA	NA	NA	NA	NA	G	G	A	A	A	G	A	G	G	A	G	R	G	A	A	R	A	R	A	A	A	A	A	A	A	A	G	A	A	A	A	G	A	A	A	G	G	G	A
AX-109878966	A/G	1A	559682112	+	NA	NA	NA	NA	NA	NA	G	G	A	A	A	G	A	G	G	A	G	R	G	A	A	R	A	R	A	A	A	A	A	A	A	A	G	A	A	A	A	G	A	A	A	G	G	G	A
AX-108774192	T/C	1A	559730859	+	NA	NA	NA	NA	NA	NA	C	Y	T	T	T	C	T	C	C	T	C	C	C	T	Y	Y	T	N	T	T	T	T	Y	N	T	T	C	T	T	T	Y	C	T	N	T	C	C	C	N
AX-109367106	C/T	1A	560037768	+	NA	NA	NA	NA	NA	NA	T	T	C	C	C	T	C	T	T	C	T	Y	T	C	C	Y	C	Y	C	C	C	C	C	C	C	C	T	C	C	C	C	T	C	C	C	T	T	T	C
AX-109348426	G/A	1A	560050675	+	NA	NA	NA	NA	NA	NA	A	N	G	G	G	A	G	A	A	G	A	N	A	G	G	R	G	R	G	G	G	G	G	G	G	G	A	G	G	G	G	A	G	G	G	A	A	A	G
AX-110050907	G/C	1A	560051145	+	NA	NA	NA	NA	NA	NA	C	N	G	G	G	C	G	C	C	G	C	C	C	G	G	N	G	C	G	G	G	G	G	G	G	G	C	G	G	G	G	C	G	G	G	C	C	C	G
AX-179560872	A/G	1A	560099746	+	NA	NA	NA	NA	NA	NA	G	G	A	A	A	G	A	G	G	A	G	N	G	A	A	R	A	R	A	A	A	A	A	A	A	A	G	A	A	A	A	G	A	A	A	G	G	G	A
AX-110932656	A/G	1A	560119480	+	NA	NA	NA	NA	NA	NA	A	A	A	A	A	A	A	A	A	A	A	R	A	A	A	A	A	R	A	A	A	A	A	R	A	A	G	G	A	G	G	G	A	A	A	G	G	G	A
AX-110492197	C/A	1A	560137575	+	NA	NA	NA	NA	NA	NA	C	C	C	C	C	C	C	C	C	C	C	C	C	C	C	C	A	C	C	C	C	C	C	A	C	C	C	A	C	A	A	C	C	C	C	C	C	C	C
AX-112290028	G/A	1A	560334681	+	NA	NA	NA	NA	NA	NA	G	G	G	G	G	G	G	G	G	G	G	A	G	G	G	G	G	A	G	G	G	G	G	G	G	G	A	G	G	G	G	A	G	G	G	A	A	A	G
AX-110415838	G/A	1A	560520594	+	NA	NA	NA	NA	NA	NA	G	G	G	G	G	G	G	G	G	G	G	R	G	G	G	G	G	R	G	G	G	G	G	G	G	G	A	G	G	G	G	A	G	G	G	A	A	A	G
AX-110131778	T/C	1A	560556439	+	NA	NA	NA	NA	NA	NA	T	T	T	T	T	T	T	T	T	T	T	Y	T	T	T	T	T	T	T	T	T	T	T	T	T	T	C	T	T	T	T	C	T	T	T	C	C	C	T
AX-94725691	C/T	1A	560619728	+	NA	NA	NA	NA	NA	NA	C	N	C	C	C	C	C	C	C	C	C	Y	C	C	C	C	C	N	C	C	C	C	C	C	C	C	T	C	N	C	C	T	C	C	C	T	T	T	C
AX-94393159	A/G	1A	560625919	+	NA	NA	NA	NA	NA	NA	A	A	A	A	A	A	A	A	A	A	A	R	A	A	A	A	A	R	A	A	A	A	A	A	A	A	G	A	A	A	A	G	A	A	A	G	G	G	A
AX-111484970	G/A	1A	560626874	+	NA	NA	NA	NA	NA	NA	G	G	G	G	G	G	G	G	G	G	G	R	G	G	G	G	G	R	G	G	G	G	G	G	G	G	A	G	G	G	G	A	G	G	G	A	A	A	G
AX-112289151	G/A	1A	560689754	+	NA	NA	NA	NA	NA	NA	G	G	A	A	A	G	A	G	G	A	G	G	G	R	R	R	R	N	R	R	A	R	R	R	A	A	N	R	R	A	R	N	A	R	A	G	G	G	R
AX-95654184	G/A	1A	560690056	+	NA	NA	NA	NA	NA	NA	A	A	G	G	G	A	G	A	A	G	A	R	A	G	G	R	G	R	G	G	G	G	G	G	G	G	A	G	G	G	G	A	G	G	G	A	A	A	G
AX-109384582	C/A	1A	560756776	+	NA	NA	NA	NA	NA	NA	C	C	C	C	A	C	C	C	C	C	C	C	C	C	C	C	C	C	C	C	C	C	N	M	C	C	C	A	C	A	A	C	C	C	C	C	C	C	C
AX-108819425	T/C	1A	560884391	+	NA	NA	NA	NA	NA	NA	T	T	T	T	C	T	T	T	T	T	T	T	T	T	T	T	T	T	T	T	T	T	T	T	T	T	T	C	T	C	C	T	T	T	T	T	T	T	T
AX-94527084	T/C	1A	560906285	+	NA	NA	NA	NA	NA	NA	T	T	T	T	C	T	T	T	T	T	T	T	T	T	T	T	T	T	T	T	T	T	T	T	T	T	T	Y	T	C	Y	T	T	T	T	T	T	T	T
AX-94406447	C/T	1A	560912823	+	NA	NA	NA	NA	NA	NA	T	T	C	C	C	T	C	T	T	C	T	Y	T	C	C	Y	C	Y	C	C	C	C	C	C	C	C	T	C	C	C	C	T	C	C	C	T	T	T	C
AX-158568808	C/T	1A	560913389	+	NA	NA	NA	NA	NA	NA	C	C	C	T	C	C	C	C	C	C	C	C	C	C	C	Y	C	C	C	C	T	C	T	C	C	T	C	C	T	C	C	C	C	T	T	C	C	C	T
AX-179560168	C/T	1A	560913389	+	NA	NA	NA	NA	NA	NA	C	C	C	T	C	C	C	C	C	C	C	C	C	C	C	C	C	C	C	C	T	C	Y	C	C	T	C	C	Y	C	C	C	C	Y	T	C	C	C	N
AX-86162921	C/A	1A	560934592	+	NA	NA	NA	NA	NA	NA	C	C	C	C	C	C	C	C	C	C	C	M	C	C	C	C	C	N	C	C	C	C	C	C	C	C	A	C	C	C	C	A	C	C	C	A	A	A	C
AX-86162922	A/C	1A	560934592	+	NA	NA	NA	NA	NA	NA	M	M	C	M	M	N	C	M	C	C	M	A	N	M	M	M	M	C	M	M	M	M	M	M	C	C	A	M	M	M	M	A	M	M	M	A	A	A	M
AX-110377453	C/T	1A	560955379	+	NA	NA	NA	NA	NA	NA	C	C	C	C	C	C	C	C	C	C	C	Y	C	C	C	C	C	Y	C	C	C	C	C	C	C	C	T	C	C	C	C	T	C	C	C	T	T	T	C
AX-109282272	A/G	1A	560956362	+	NA	NA	NA	NA	NA	NA	A	A	A	A	A	A	A	A	A	A	A	N	A	A	A	A	A	R	A	A	A	A	A	A	A	A	G	A	A	A	A	G	A	A	A	G	G	G	A
AX-95629547	G/A	1A	560957313	+	NA	NA	NA	NA	NA	NA	G	G	G	G	G	G	G	G	G	G	G	R	G	G	G	G	G	R	G	G	G	G	N	G	G	G	A	G	N	G	G	A	G	G	G	A	A	A	G
AX-94384125	C/T	1A	560959273	+	NA	NA	NA	NA	NA	NA	C	C	C	C	C	C	C	C	C	C	C	Y	C	C	C	C	C	Y	C	C	C	C	C	C	C	C	T	C	C	C	C	T	C	C	C	T	T	T	C
AX-95630265	C/T	1A	560959273	+	NA	NA	NA	NA	NA	NA	C	C	C	C	C	C	C	C	C	C	C	Y	C	C	C	C	C	Y	C	C	C	C	C	C	C	C	T	C	C	C	C	T	C	C	C	T	T	T	C
AX-109561473	G/A	1A	560959512	+	NA	NA	NA	NA	NA	NA	G	G	G	G	G	G	G	G	G	G	G	N	G	G	G	G	G	A	G	G	G	G	R	G	G	G	A	G	G	G	G	A	G	G	G	A	A	A	G
AX-111711824	T/G	1A	560965140	+	NA	NA	NA	NA	NA	NA	T	T	T	T	T	T	T	T	T	T	T	K	T	T	T	T	T	K	T	T	T	T	T	T	T	T	G	T	T	T	T	G	T	T	T	G	G	G	T
AX-95628765	C/T	1A	561009150	+	NA	NA	NA	NA	NA	NA	Y	Y	C	C	C	C	C	C	C	C	C	T	C	Y	Y	Y	Y	N	Y	Y	C	Y	Y	Y	C	C	T	Y	Y	C	Y	T	C	Y	C	T	T	T	Y
AX-86171566	G/A	1A	561009374	+	NA	NA	NA	NA	NA	NA	R	R	A	A	A	A	A	A	A	A	A	R	A	R	R	R	R	N	R	R	A	R	R	R	N	A	G	R	R	A	R	G	A	G	A	G	G	G	R
AX-111642264	A/G	1A	561657782	+	NA	NA	NA	NA	NA	NA	A	A	A	A	A	A	A	A	A	A	A	R	A	A	A	A	A	A	A	A	A	A	A	A	A	A	G	A	A	A	A	G	A	A	A	G	G	G	A
AX-110973245	G/A	1A	562203227	+	NA	NA	NA	NA	NA	NA	G	G	G	G	G	G	G	G	G	G	G	R	G	G	G	G	G	R	G	G	G	G	G	G	G	G	A	G	G	G	G	A	G	G	G	A	A	A	G
AX-110595645	G/T	1A	562217287	+	NA	NA	NA	NA	NA	NA	G	G	G	G	G	G	G	G	G	G	G	K	G	G	G	G	G	K	G	G	G	G	G	G	G	G	T	G	G	G	G	T	G	G	G	T	T	T	G
AX-108824028	G/A	1A	562217988	+	NA	NA	NA	NA	NA	NA	G	G	G	G	G	G	G	G	G	G	G	R	G	G	G	G	G	R	G	G	G	G	G	G	G	G	A	G	G	G	G	A	G	G	G	A	A	A	G
AX-109014157	A/G	1A	562704990	+	NA	NA	NA	NA	NA	NA	A	A	A	A	A	A	A	A	A	A	A	N	A	N	A	A	A	A	A	A	A	A	A	A	A	A	G	A	A	A	A	G	A	A	A	G	G	G	A
AX-111741007	T/C	1A	562707506	+	NA	NA	NA	NA	NA	NA	T	T	T	T	T	T	T	T	T	T	T	Y	T	T	T	T	T	Y	T	T	T	T	T	T	T	T	C	T	T	T	T	C	T	T	T	C	C	C	T
AX-109827916	T/C	1A	562711727	+	NA	NA	NA	NA	NA	NA	T	T	T	T	T	T	T	T	T	T	T	Y	T	T	T	T	T	Y	T	T	T	T	T	T	T	T	C	T	T	T	T	C	T	T	T	C	C	C	T
AX-111711862	A/G	1A	563166914	+	NA	NA	NA	NA	NA	NA	N	N	A	A	A	A	A	A	A	A	A	A	A	N	G	N	N	A	N	R	G	R	N	R	A	A	A	R	N	A	N	G	A	R	A	N	A	G	G
AX-94722894	A/G	1A	566028761	+	NA	NA	NA	NA	NA	NA	G	G	G	A	G	G	A	G	G	A	A	A	A	G	A	A	A	A	A	G	G	A	A	A	A	A	A	A	G	A	A	A	A	A	A	A	A	A	A
AX-89727488	C/T	1A	566846234	+	NA	NA	NA	NA	NA	NA	C	C	C	C	C	C	C	C	C	C	C	Y	C	C	C	C	C	Y	C	C	C	C	C	C	C	C	T	C	C	C	C	T	C	C	C	T	T	T	C
AX-110925917	G/T	1A	567328770	+	NA	NA	NA	NA	NA	NA	T	T	T	T	T	T	G	T	T	G	T	G	G	G	G	T	G	G	G	G	T	G	K	K	G	T	G	T	G	T	T	G	G	T	T	G	G	G	T
AX-158560613	A/G	1A	567809792	+	NA	NA	NA	NA	NA	NA	R	G	G	G	A	A	A	A	A	A	G	A	A	G	R	R	G	N	R	R	A	R	R	R	A	G	A	G	G	G	G	G	A	G	A	G	A	G	G
AX-108870081	A/G	1A	567827708	+	NA	NA	NA	NA	NA	NA	G	G	G	G	G	G	A	G	G	N	G	A	A	A	A	G	A	A	A	A	G	A	G	R	A	G	A	G	A	G	G	A	A	G	G	A	A	A	G
AX-109982403	T/C	1A	567827846	+	NA	NA	NA	NA	NA	NA	C	C	C	C	C	C	T	C	C	T	C	T	T	T	T	C	T	T	T	T	C	T	C	Y	T	C	T	C	T	C	C	T	T	C	C	T	T	T	C
AX-111642140	C/T	1A	568207284	+	NA	NA	NA	NA	NA	NA	T	T	T	T	T	T	C	T	T	C	T	C	C	C	C	T	C	C	T	C	T	C	T	Y	C	T	C	T	C	T	T	C	C	T	T	C	C	C	T
AX-109272385	C/T	1A	568486251	+	NA	NA	NA	NA	NA	NA	C	C	C	C	C	C	C	C	C	C	C	N	C	C	C	C	C	N	C	C	C	C	C	C	C	C	T	C	C	C	C	T	C	C	C	T	T	T	C
AX-109846495	C/T	1A	568533054	+	NA	NA	NA	NA	NA	NA	C	C	T	T	C	C	C	C	C	C	C	N	C	C	C	Y	C	C	C	C	T	C	Y	Y	C	T	C	Y	C	T	Y	C	C	Y	T	C	C	C	Y
AX-109945465	C/G	1A	568533221	+	NA	NA	NA	NA	NA	NA	G	G	C	C	G	G	C	G	G	C	G	S	C	C	C	S	C	S	G	C	C	C	C	C	C	C	G	C	C	C	C	G	C	C	C	G	G	G	C
AX-110377984	C/T	1A	568533342	+	NA	NA	NA	NA	NA	NA	C	C	T	T	C	C	C	C	C	C	C	C	C	C	C	Y	C	C	C	C	T	C	T	Y	C	T	C	T	C	T	T	C	C	T	T	C	C	C	T
AX-111590368	A/G	1A	568533892	+	NA	NA	NA	NA	NA	NA	A	A	G	G	A	A	A	A	A	A	A	N	A	A	A	R	A	A	A	A	G	A	G	R	A	G	A	G	A	G	G	A	A	G	G	A	A	A	G
AX-111019905	A/G	1A	568570574	+	NA	NA	NA	NA	NA	NA	G	G	G	A	G	A	G	A	G	G	A	A	G	G	G	R	G	N	G	G	A	G	A	G	G	A	A	G	G	G	G	A	G	A	A	A	A	A	A
AX-110480890	A/G	1A	568571980	+	NA	NA	NA	NA	NA	NA	A	A	G	A	A	A	A	A	A	A	A	A	A	A	A	A	A	A	A	A	A	A	A	R	A	A	A	G	A	G	G	A	A	A	A	A	A	A	A
AX-108935491	C/T	1A	568574499	+	NA	NA	NA	NA	NA	NA	C	C	T	T	C	C	C	C	C	C	C	C	C	C	C	Y	C	C	C	C	T	C	T	Y	C	T	C	T	N	T	T	C	C	T	T	C	C	C	T
AX-110717012	C/T	1A	568574671	+	NA	NA	NA	NA	NA	NA	C	C	T	T	C	C	C	C	C	C	C	C	C	C	C	Y	C	C	C	C	T	C	T	Y	C	T	C	N	C	T	T	C	C	T	T	C	C	C	T
AX-109493289	C/T	1A	568580736	+	NA	NA	NA	NA	NA	NA	C	C	C	C	C	T	C	T	C	C	T	Y	C	C	C	C	C	Y	C	C	C	C	C	C	C	C	T	C	C	C	C	T	C	C	C	T	T	T	C
AX-110932792	G/A	1A	568582099	+	NA	NA	NA	NA	NA	NA	G	G	A	A	G	G	G	G	G	G	G	G	G	G	G	R	G	G	G	G	A	G	A	R	G	A	G	A	G	A	A	G	G	A	A	G	G	G	A
AX-110592622	C/G	1A	568583397	+	NA	NA	NA	NA	NA	NA	C	C	G	G	C	C	C	C	C	C	C	C	C	C	C	S	C	C	C	C	G	C	G	S	C	G	C	G	C	G	G	C	C	G	G	C	C	C	G
AX-110971082	A/G	1A	568584869	+	NA	NA	NA	NA	NA	NA	A	A	G	G	A	A	A	A	A	A	A	A	A	A	A	N	A	A	R	A	G	A	R	A	A	G	A	R	A	G	R	A	A	R	G	A	A	A	R
AX-94637020	G/A	1A	568587469	+	NA	NA	NA	NA	NA	NA	G	G	G	A	G	G	G	G	G	G	G	G	G	G	G	R	G	G	G	G	A	G	R	G	G	A	G	G	G	G	G	G	G	R	A	G	G	G	R
AX-109826247	T/A	1A	568589517	+	NA	NA	NA	NA	NA	NA	T	T	T	T	T	A	T	A	T	T	A	W	T	T	T	W	T	W	A	T	T	N	T	T	T	T	A	N	T	T	T	A	T	T	T	A	A	A	T
AX-109816770	C/A	1A	568596250	+	NA	NA	NA	NA	NA	NA	C	C	C	C	C	A	C	A	C	C	A	M	C	C	C	C	C	M	A	C	C	C	C	C	C	C	A	C	C	C	C	A	C	C	C	A	A	A	C
AX-111456113	G/C	1A	568859975	+	NA	NA	NA	NA	NA	NA	G	G	C	G	G	G	G	G	G	G	G	G	G	G	G	G	G	G	N	G	G	G	G	S	G	G	G	C	G	C	C	G	G	G	G	G	G	G	G
AX-110444280	C/T	1A	568860014	+	NA	NA	NA	NA	NA	NA	C	C	C	C	C	T	C	T	C	C	T	Y	C	C	C	C	C	Y	C	C	C	C	C	C	C	C	T	C	C	C	C	T	C	C	C	T	T	T	C
AX-108825802	C/T	1A	568958709	+	NA	NA	NA	NA	NA	NA	C	C	T	C	C	C	C	C	C	C	C	C	C	C	C	C	C	C	C	C	C	C	C	Y	C	C	C	T	C	T	T	C	C	C	C	C	C	C	C
AX-109272492	A/C	1A	568959469	+	NA	NA	NA	NA	NA	NA	M	M	C	C	C	A	C	A	C	C	A	A	C	M	M	M	M	M	M	M	C	M	M	M	C	C	A	M	M	C	M	A	C	M	C	A	A	A	M
AX-110954177	G/A	1A	568960350	+	NA	NA	NA	NA	NA	NA	G	G	G	G	G	A	G	A	G	G	A	A	G	G	G	G	G	R	G	G	G	G	G	G	G	G	A	G	G	G	G	A	G	G	G	A	A	A	G
AX-110583498	C/T	1A	568968023	+	NA	NA	NA	NA	NA	NA	C	C	C	C	C	T	C	T	C	C	T	T	C	C	C	C	C	Y	C	C	C	C	C	C	C	C	T	C	C	C	N	T	C	C	C	T	T	T	C
AX-111583395	G/A	1A	569265809	+	NA	NA	NA	NA	NA	NA	G	G	G	G	G	A	G	A	G	G	A	R	G	G	G	G	G	R	G	G	G	G	G	G	G	G	A	G	G	G	G	A	G	G	G	A	A	A	G
AX-109464968	C/T	1A	569573683	+	NA	NA	NA	NA	NA	NA	C	C	C	C	C	T	C	T	C	C	T	Y	C	C	C	C	C	Y	C	C	C	C	C	C	C	C	T	C	C	C	C	T	C	C	C	T	T	T	C
AX-109270646	C/T	1A	569573753	+	NA	NA	NA	NA	NA	NA	C	C	T	C	C	C	C	C	C	C	C	C	C	C	C	C	C	C	C	C	C	C	C	Y	C	C	C	T	C	T	T	C	C	C	C	C	C	C	C
AX-108865974	G/A	1A	569573800	+	NA	NA	NA	NA	NA	NA	G	G	A	G	G	G	G	G	G	G	G	G	G	G	G	G	G	G	G	G	G	G	G	R	G	G	G	A	G	A	A	G	G	G	G	G	G	G	G
AX-110042518	G/A	1A	569584276	+	NA	NA	NA	NA	NA	NA	G	G	A	G	G	G	G	G	G	G	G	G	G	G	G	G	G	G	G	G	G	G	G	R	G	G	G	A	G	A	A	G	G	G	G	G	G	G	G
AX-109818870	C/T	1A	569665694	+	NA	NA	NA	NA	NA	NA	C	C	T	C	C	C	C	C	C	C	C	C	C	C	C	C	C	C	C	C	C	C	C	Y	C	C	C	T	C	T	T	C	C	C	C	C	C	C	C
AX-110548608	C/T	1A	569673503	+	NA	NA	NA	NA	NA	NA	T	T	C	C	T	T	C	T	T	C	T	T	C	C	C	Y	C	Y	C	C	C	C	C	C	C	C	T	C	T	C	C	T	C	C	C	T	T	T	C
AX-109481180	A/G	1A	569707951	+	NA	NA	NA	NA	NA	NA	A	A	G	G	A	A	A	A	A	N	A	A	A	R	R	R	R	A	G	R	G	R	G	G	N	G	A	G	A	G	G	A	A	G	G	A	A	A	G
AX-110127239	T/C	1A	569708050	+	NA	NA	NA	NA	NA	NA	T	T	C	T	T	T	T	T	T	T	T	T	T	Y	N	T	T	T	N	Y	T	Y	Y	N	T	T	T	C	T	C	C	T	T	Y	T	T	T	T	Y
AX-111629791	G/A	1A	569708096	+	NA	NA	NA	NA	NA	NA	G	G	A	G	G	G	G	G	G	G	G	G	G	N	N	G	N	G	N	N	G	N	N	A	G	G	G	A	G	A	A	G	G	N	G	G	G	G	N
AX-108865635	A/T	1A	569761729	+	NA	NA	NA	NA	NA	NA	A	A	T	A	A	A	T	A	A	T	A	A	T	W	W	A	W	T	A	W	A	W	A	W	T	A	A	W	A	T	W	A	T	A	A	A	A	A	A
AX-109885148	A/G	1A	569773743	+	NA	NA	NA	NA	NA	NA	A	A	G	A	A	A	G	A	A	G	A	A	G	R	R	A	R	R	A	R	A	R	A	R	G	A	A	R	A	G	R	A	G	A	A	A	A	A	A
AX-111575061	A/G	1A	569773842	+	NA	NA	NA	NA	NA	NA	A	A	G	A	A	A	A	A	A	A	A	A	A	A	A	A	A	A	A	A	A	A	A	R	A	A	A	G	A	G	G	A	A	A	A	A	A	A	A
AX-111569331	C/T	1A	569810811	+	NA	NA	NA	NA	NA	NA	C	C	T	C	C	C	T	C	C	T	C	C	T	T	T	C	T	Y	C	T	C	T	C	T	T	C	C	T	C	T	T	C	T	C	C	C	C	C	C
AX-179557324	G/A	1A	569945176	+	NA	NA	NA	NA	NA	NA	G	G	A	A	G	G	A	G	G	A	G	G	A	A	A	N	A	R	A	A	A	A	G	A	A	G	G	A	G	A	A	G	A	A	A	G	G	G	A
AX-94642282	A/G	1A	569945176	+	NA	NA	NA	NA	NA	NA	R	R	A	A	G	G	A	G	G	A	G	G	A	A	A	R	A	G	A	A	A	A	R	A	A	G	G	A	R	A	A	G	A	A	A	R	G	G	A
AX-110930956	A/C	1A	569963034	+	NA	NA	NA	NA	NA	NA	A	A	C	C	A	A	C	A	A	C	A	A	C	C	C	M	C	M	C	C	C	C	A	M	C	A	A	A	A	A	A	A	C	C	C	A	A	A	C
AX-108758442	A/C	1A	570050047	+	NA	NA	NA	NA	NA	NA	A	A	C	C	A	A	C	A	A	C	A	A	C	C	C	M	C	M	C	C	C	C	A	M	C	A	A	A	A	A	A	A	C	C	C	A	A	A	C
AX-108950785	A/T	1A	570050281	+	NA	NA	NA	NA	NA	NA	A	A	T	T	A	A	T	A	A	T	A	A	T	T	T	W	T	W	T	T	T	T	A	W	T	A	A	A	A	A	A	A	T	T	T	A	A	A	T
AX-179477236	C/T	1A	570107679	+	NA	NA	NA	NA	NA	NA	C	C	C	T	C	C	C	C	C	C	C	C	C	C	C	C	C	C	Y	C	T	C	C	C	C	C	C	C	C	C	C	C	C	Y	T	C	C	C	Y
AX-179562484	C/T	1A	570107679	+	NA	NA	NA	NA	NA	NA	C	C	C	Y	C	C	C	C	C	C	C	C	C	C	C	C	C	C	Y	C	Y	C	C	C	C	C	C	C	C	C	C	C	C	Y	Y	C	C	C	Y
AX-108990247	T/C	1A	570157842	+	NA	NA	NA	NA	NA	NA	Y	Y	T	T	C	C	T	C	C	T	C	T	T	T	T	Y	T	T	T	T	T	T	Y	N	T	C	T	Y	Y	C	Y	T	T	T	T	T	T	T	T
AX-179477356	A/G	1A	570158879	+	NA	NA	NA	NA	NA	NA	R	R	G	G	G	A	A	G	A	A	G	A	G	R	R	R	R	A	R	R	G	R	N	R	A	A	A	R	R	G	R	A	G	R	G	A	A	A	R
AX-179562604	G/A	1A	570158879	+	NA	NA	NA	NA	NA	NA	G	G	G	G	G	G	G	G	G	G	G	A	G	G	G	G	G	A	G	G	G	G	G	G	G	G	A	G	G	G	G	A	G	G	G	A	A	A	G
AX-111568646	C/T	1A	570169580	+	NA	NA	NA	NA	NA	NA	C	C	C	C	C	C	C	C	C	C	C	Y	C	C	C	C	C	Y	C	C	C	C	C	C	C	C	T	C	C	C	C	T	C	C	C	T	T	T	C
AX-110153351	G/T	1A	570515424	+	NA	NA	NA	NA	NA	NA	T	T	G	G	T	T	T	T	T	T	T	K	T	T	T	K	T	K	G	T	G	T	T	T	T	T	G	T	T	T	T	G	T	G	G	G	G	G	G
AX-111203882	T/C	1A	570791840	+	NA	NA	NA	NA	NA	NA	Y	Y	T	T	T	T	T	T	T	T	T	Y	T	Y	Y	N	Y	Y	Y	Y	T	Y	Y	Y	T	T	C	Y	Y	T	Y	C	T	N	T	C	C	C	Y
AX-109002990	C/T	1A	570949577	+	NA	NA	NA	NA	NA	NA	T	T	C	C	T	T	C	T	T	C	T	C	C	C	C	Y	C	C	C	C	C	C	T	Y	C	T	C	Y	T	T	T	C	C	C	C	C	C	C	C
AX-110373408	C/T	1A	570972410	+	NA	NA	NA	NA	NA	NA	T	T	C	C	T	T	C	T	T	C	T	C	C	C	C	Y	C	C	C	C	C	C	T	Y	C	T	C	T	T	T	T	C	C	C	C	C	C	C	C
AX-108773772	C/T	1A	570989697	+	NA	NA	NA	NA	NA	NA	C	C	C	C	C	C	C	C	C	C	C	Y	C	C	C	C	C	Y	C	C	C	C	C	C	C	C	T	C	C	C	C	T	C	C	C	T	T	T	C
AX-109306861	C/T	1A	570989795	+	NA	NA	NA	NA	NA	NA	T	T	C	C	T	T	C	T	T	C	T	C	C	C	C	Y	C	C	C	C	C	C	T	Y	C	T	C	T	T	T	T	C	C	C	C	C	C	C	C
AX-110371541	G/A	1A	571016169	+	NA	NA	NA	NA	NA	NA	A	A	G	G	A	A	G	A	A	G	A	G	G	G	G	R	G	G	G	G	G	G	A	A	G	A	G	A	A	A	A	G	G	G	G	G	G	G	G
AX-111170306	C/T	1A	571300149	+	NA	NA	NA	NA	NA	NA	T	T	C	C	T	T	C	T	T	C	T	C	C	C	C	Y	C	C	C	C	C	C	T	Y	C	T	C	T	T	T	T	C	C	C	C	C	C	C	C
AX-94906452	G/T	1A	571307752	+	NA	NA	NA	NA	NA	NA	G	G	T	G	G	G	G	G	T	G	T	G	G	G	K	G	G	N	G	G	G	G	G	G	G	T	G	K	K	T	K	T	G	G	G	G	G	G	G
AX-86172461	A/G	1A	571311552	+	NA	NA	NA	NA	NA	NA	A	A	A	A	A	A	A	A	A	A	A	R	A	A	A	A	A	A	A	A	A	A	A	A	A	A	G	A	A	A	A	G	A	A	A	G	G	G	A
AX-86172462	A/G	1A	571311552	+	NA	NA	NA	NA	NA	NA	A	A	A	A	A	A	A	A	A	A	A	R	A	A	A	A	A	N	A	A	A	A	A	A	A	A	G	A	A	A	A	G	A	A	A	G	G	G	A
AX-111606101	G/C	1A	571319464	+	NA	NA	NA	NA	NA	NA	G	G	G	G	G	G	G	G	G	G	G	S	G	G	G	G	G	S	G	G	G	G	G	G	G	G	C	G	C	G	G	C	G	G	G	C	C	C	G
AX-111724995	A/G	1A	571355777	+	NA	NA	NA	NA	NA	NA	G	A	R	A	A	G	A	G	A	A	G	G	A	A	A	A	A	R	A	A	A	A	A	R	A	G	G	G	A	G	G	G	A	A	A	G	G	G	A
AX-112290131	C/T	1A	571456752	+	NA	NA	NA	NA	NA	NA	C	C	C	T	C	C	Y	C	C	C	C	C	C	Y	C	C	C	C	Y	C	N	C	Y	C	C	C	C	C	C	C	C	C	C	Y	T	C	C	C	Y
AX-110361305	A/C	1A	571467658	+	NA	NA	NA	NA	NA	NA	A	A	A	A	C	A	A	A	A	A	A	C	A	A	A	A	A	M	A	A	A	A	C	A	A	C	C	A	A	A	A	C	A	A	A	C	C	C	A
AX-110423705	A/G	1A	571825818	+	NA	NA	NA	NA	NA	NA	A	A	G	A	A	A	A	A	A	G	A	A	G	A	R	A	R	R	A	R	A	R	A	R	G	A	A	R	R	G	R	A	G	A	A	A	A	A	A
AX-109382640	A/C	1A	571888149	+	NA	NA	NA	NA	NA	NA	C	C	C	A	C	C	A	C	C	C	C	A	C	A	C	A	C	M	A	C	A	C	C	C	C	C	A	C	C	C	C	A	C	A	A	A	A	A	A
[truncated: 50,611 more rows]
[truncated: 74 more columns]

## Sheet: Table S4
Table S4	Phenotypic data of all 195 wheat cultivars used in this study under control and heat stress conditions.
		Control				Heat stress
Sr#	Names	Root length (cm)	Root weight (g)	Shoot length (cm)	Shoot weight (g)	Root length (cm)	Root weight (g)	Shoot length (cm)	Shoot weight (g)
1	T-9	15.05	0.2	38	1.895	18.7667	0.183333	38	0.666667
2	T-11	12.8667	0.146667	42.6667	1.58667	12.9	0.079	38.5	0.68
3	Dirk	9.65	0.125	54.5	2.05	15.65	0.165	39	0.825
4	C-518	11	0.123333	45	1.86667	19.8333	0.226667	42.3333	0.973333
5	C-591	13.2667	0.163333	43.6667	2	13.1667	0.0347667	34.6667	0.503333
6	C-228	12.8	0.163333	42	1.38	20.1667	0.173333	40	0.883333
7	C-217	12.1	0.116	46	2.01	14.3333	0.051	42	0.943333
8	C-250	22.3	0.18	39.5	1.28	14.5	0.11	41.5	0.58
9	C-271	13.6333	0.266667	40.6667	1.88333	18	0.32	42	1.06
10	C-273	15.9333	0.2	39.3333	1.56667	13.5	0.135	46	0.9
11	Mexipak 65	13.8333	0.123	39.6667	1.36667	14.1667	0.0933333	31.1667	0.723333
12	Khushal-69	16.9333	0.216667	40	1.36	17.7667	0.226667	38	0.896667
13	Chenab-70	14.1	0.17	47	1.87333	12.9333	0.273333	39	0.823333
14	Barani-70	15.1667	0.133333	43.6667	2.06667	13.1667	0.103333	44	0.683333
15	Blue silver	11.9	0.0833333	44	1.49	11.9333	0.0466667	41.3333	0.743333
16	SA-42	14	0.07	42	1.38333	15.2667	0.103333	40.3333	0.773333
17	Lylpur-73	12.8333	0.115	48.6667	1.91333	13.9667	0.0866667	34.6667	0.706667
18	Pari-73	14.1667	0.25	42	1.76	15.6667	0.07	35.6667	0.623333
19	Parula-73	14.5	0.123333	46	1.81667	14.4667	0.153333	37	0.76
20	Yacora	12.6	0.06	30	1.36667	12.7667	0.09	28.0667	0.51
21	LU-26	13.9	0.115	42.5	2.06	14.3333	0.266667	42	0.596667
22	Punjab-76	12.3667	0.123333	36.6667	1.71667	16.8	0.1	37	0.52
23	WL-711	12.5	0.1	51	1.5	13.1667	0.143333	43	0.763333
24	Jauhar-78	12.1667	0.0633333	42.6667	1.51333	14.6667	0.0633333	40.3333	0.55
25	Zarghoon	11	0.11	34.3333	1.26667	14.5667	0.0933333	36.6667	0.77
26	Pak-81	9.33333	0.0833333	43.8333	0.903333	13.7	0.0666667	44	0.8
27	Punjab-81	13.6667	0.19	43.3333	1.61333	15.1	0.09	41.6667	0.756667
28	Sindh-81	11.3333	0.103333	47	1.70667	14.1667	0.166667	41.3333	0.943333
29	Faisalabad-83	12.2	0.146667	59.3333	2.65333	19.8	0.196667	46.6667	1.22667
30	Kohinoor-83	NA	NA	NA	NA	14	0.08	32.5	0.48
31	Barani-83	11.4	0.113333	42	1.65	13.6667	0.08	40.8333	0.61
32	Faisalabad-85	13.8333	0.213333	39.3333	1.72667	13	0.185	43.5	0.8
33	Sarsabz	14.8	0.11	50.5	1.51667	14.7667	0.163333	49.6667	0.96
34	Tandojam-83	10.5	0.085	38	0.965	14.6	0.08	38	0.63
35	Pirsbak-85	14.1667	0.153333	42	1.39	18.1	0.15	40.3333	0.81
36	Punjab-85	14.1	0.24	44.6667	2.14667	11.3	0.065	41.25	0.755
37	Wadank-85	12.5	0.111667	36.6667	1.04	10.9	0.0443333	30.5333	0.61
38	Chakwal-86	12.8333	0.233333	44.3333	1.72333	14.8	0.103333	43.1667	0.913333
39	Rawal-87	12.35	0.145	42	1.555	13.5	0.0833333	35	0.683333
40	Khyber-87	16.8333	0.136667	44.5	1.95	12.1	0.0966667	33.1667	0.77
41	Sutluj-86	14.5	0.5	41	0.983333	14.5	0.18	47.5	1.225
42	Shalimar-88	15.6667	0.29	41	1.61	12.6	0.07	36.3333	0.743333
43	Zardana	15.5	0.183333	46.6667	2.32	14.3667	0.0733333	36	0.816667
44	Mehran-89	15.65	0.2	43.75	2.715	14.4667	0.08	40.1667	0.813333
45	Rohtas-90	12.4333	0.138333	38.6667	1.67	17.4	0.223333	40.6667	1.03333
46	Inqilab-91	16.5333	0.087	41	1.32667	12.55	0.14	42	1
47	Pasban-90	11.6	0.103333	39	1.56667	14.4333	0.08	33.2667	0.853333
48	Soghat-90	17.7	0.11	41.1667	1.65667	13.25	0.045	32.25	0.645
49	Bakhtawar-92	14.8	0.152333	38	1.67667	13.9333	0.226667	41.3333	0.996667
50	Kaghan-93	13.6667	0.27	42.3333	1.369	17.2333	0.233333	45.1667	0.713333
51	Anmol-91	18.5	0.329333	42.6667	1.61333	16.4	0.303333	37.1667	0.79
52	Shaheen-94	14.7333	0.253333	37.6667	1.43333	17.95	0.215	39.5	0.78
53	Parwaz-94	14.6667	0.16	45	1.36333	13.2333	0.133333	37	0.73
54	Shahkar-95	12.4	0.0585	46.5	1.39	12.6667	0.0633333	28.6667	0.546667
55	Kohsar-95	13.1	0.1138	52.5	1.74	14.1667	0.166667	34	0.693333
56	Kirin-95	13.2333	0.0933333	49.6667	1.62	13.6667	0.0833333	38.3333	0.8
57	Nowshera-96	13.4333	0.0966667	48.6667	2.02667	13.6	0.0866667	33.2667	0.696667
58	Punjab-96	13.1667	0.13	43.3333	1.69333	14.9333	0.12	35	0.816667
59	Suleman-96	15.9	0.253333	47	2.65	13.9667	0.116667	40.6667	1.03
60	Abadgar-93	15.3	0.175	43	1.665	15.2333	0.116667	40.3333	0.933333
61	Soorab-96 (B)	15.4667	0.263333	36.6667	1.42333	12.25	0.105	33	0.8
62	Tatara	15.5	0.135	38.8333	1.45667	14.3333	0.256667	31.8333	0.57
63	ARZI-96	15.75	0.14	54	2.11	15.8	0.163333	42.3333	0.943333
64	Punjab-96	14.15	0.13	51.5	2.25	16.5333	0.0966667	36.3333	0.653333
65	Bahawalpur-97	10.3	0.0366667	35.3333	1.15333	19.2	0.263333	47.3333	1.26
66	MH-97	12.9333	0.136667	38.6667	1.4	12.0667	0.106667	28.5	0.766667
67	Kohistan-97	13.8333	0.301667	46.6667	1.61333	13.15	0.09	35.3333	0.68
68	Fakhar-e-Sarhad-97	11.9	0.16	38	1.535	13.9667	0.12	37.3333	0.936667
69	Chakwal-97	14.0667	0.226667	49.6667	1.78333	13.3333	0.143333	38.6667	0.723333
70	Durum-97	11	0.055	37	1.095	12.0333	0.156667	27.7	0.57
71	Darawar-97	13.8333	0.136667	43.3333	1.42667	16.8	0.133333	36.3333	0.946667
72	Daman-98	14.5	0.323333	38.3333	1.57667	17.2	0.166667	33.4	0.896667
73	Dera-98	13.5	0.189	38.6667	1.35667	13.35	0.07	32	0.69
74	Ghaznavi	14.1667	0.103333	49	1.575	13.6333	0.0533333	43	0.766667
75	Zarlashata	15.4	0.113333	42	1.40333	13.4333	0.0433333	39.8333	0.636667
76	Magalla-99	13.4	0.113333	39.3333	1.29	17.3333	0.12	37.1667	0.763333
77	Bahalwalpur-2000	14.8333	0.163	41	1.42	13.1	0.133333	34.6667	0.82
78	Marvi-2000	16.3333	0.136333	45.6667	1.53	12.7	0.105	33.1	0.86
79	Takbeer	13.6667	0.276667	45.3333	2.25667	20.2667	0.556667	42.5	1.45333
80	Iqbal-2000	NA	NA	NA	NA	NA	NA	NA	NA
81	Auqab-2000	13.6667	0.216667	43.6667	1.46667	13.3333	0.19	35	0.77
82	Amin-2000	13.8333	0.196667	39	1.35	13.6667	0.18	29.8333	0.72
83	Saleem-2000	16.1667	0.153333	39.6667	2.00667	16.8667	0.106667	32.5667	0.63
84	Punjnad-1	14.1667	0.0966667	38.3333	1.21	15.8	0.1	37.6667	0.796667
85	Khatakwal	11.5	0.06	42	0.996667	14.45	0.05	49	0.935
86	Raj	9.33333	0.035	31	0.936667	16.4667	0.196667	37.5	0.863333
87	Chenab-2000	16.6667	0.103333	42.3333	1.47333	14.1	0.153333	35	0.766667
88	Waqaf-01	15.1667	0.126667	42	1.51667	13.7	0.116667	35.5	0.78
89	SH-2002	13.5	0.143333	39	1.59	9.43333	0.09	35.3333	0.87
90	Bahkhar-2002	17.75	0.105	38	1.52	15.4333	0.433333	35.8333	0.976667
91	AS-2002	14.5	0.122	40	1.635	20.5	0.44	34.5	1.14
92	GA-2002	17.75	0.205	48	2.03	13	0.166667	33.3333	0.69
93	Ufaq	15.0667	0.232	40.6667	1.94	13	0.0666667	31.3333	0.66
94	Manthar-2003	12.8333	0.0966667	35	1.32067	11.25	0.065	28	0.475
95	KT-2000	15.3333	0.0623333	36.1667	0.923333	15	0.0833333	35	0.723333
96	Pirsabak-2004	14	0.0553333	38.3333	1.04333	13	0.0766667	34.3333	0.606667
97	Bhittai	13.5	0.06	36.6667	0.845	14	0.115	41.25	0.86
98	Zam-04	16.5	0.065	36	1.285	13.1667	0.0733333	32.3333	0.816667
99	TD-1	13.1667	0.098	27.6667	1.14	16.5	0.17	28.5	0.673333
100	Pirsabak-2005	15.5	0.0866667	39	1.39667	13	0.113333	37	0.686667
101	Rashkoh-2005	12	0.21	53	3.09	13.5	0.223333	39.3333	1.07
102	Moomal-2002	14.6333	0.118	51.6667	1.871	14	0.16	31.5	0.905
103	Sehar-2006	14	0.082	39.6667	1.87667	12	0.08	33.5	0.67
104	Shafaq-2006	15.5333	0.103333	35.1667	1.35333	13.3333	0.0666667	38.3333	0.76
105	Saussi	11.85	0.08	42	1.66	10.6667	0.0733333	31.6667	0.616667
106	Fareed-06	11.6667	0.0533333	43.3333	1.62333	13.1667	0.0533333	43	0.726667
107	SKD-1	13.3	0.0533333	46.3333	1.50667	14.1667	0.0733333	36	0.57
108	Imdad-05	11.6667	0.0466667	37.3333	1.22	13	0.0666667	30.6667	0.606667
109	Khirman	16.1667	0.188667	44.3333	1.58	14	0.163333	42.3333	0.98
110	Chakwal-50	13	0.06	39.5	1.45	15.5	0.173333	38.6667	0.933333
111	Lasani-08	11.1	0.08	37	1.495	21.5667	0.42	37.8333	1.35
112	Meraj-08	10.7333	0.0733333	39.3333	1.70333	16.2	0.1175	30.25	0.535
113	Faisalabad-08	13.1667	0.107667	46.6667	2.13	14.3333	0.15	38.3333	0.84
114	Bathoor-08	14.25	0.145	41.5	1.77	12.5	0.14	40	0.746667
115	Gomal-08	10.1667	0.0376667	34	0.893333	12.5	0.09	36.3333	0.69
116	Hashim-08	11.3333	0.117667	42.3333	0.936667	13.3333	0.0566667	37.3333	0.516667
117	Pirsabak-2008	13.1667	0.0563333	33.6667	1.01	13	0.116667	37	0.386667
118	NARC-2009	17.3333	0.0866667	37.3333	1.42667	13.5	0.16	41	0.59
119	BARS-2009	15.5	0.133333	45.3333	2.09333	15.75	0.17	40	0.985
120	AARI-2010	10.1667	0.0563333	44.3333	1.51	17	0.223333	33.6667	0.9
121	NIFA-Barsat 10	15.8667	0.11	37.3333	1.22	15.1667	0.21	37	0.793333
122	Nia-Amber	16.3667	0.363333	33.6667	1.05	13.3333	0.123333	34.3333	0.613333
123	Nia-Sunehri	14.9	0.106667	43.6667	1.44667	17.3333	0.18	37.6667	0.783333
124	Janbaz	16	0.12	49	1.83667	14	0.123333	41.3333	0.846667
125	Tijban-10	12.8333	0.0666667	40.3333	1.17	14.1667	0.09	40	0.9
126	Atta Habib	12.6333	0.0866667	43.3333	1.89	13.25	0.11	40.5	0.995
127	Seren	13.7333	0.106667	37.3333	1.38667	11.5	0.1	36.6667	0.73
128	KT-2010	16	0.0933333	39.6667	1.84	12.5	0.065	40.5	0.855
129	Aas-2011	15.3333	0.153333	35	1.34333	13.5	0.113333	34	0.72
130	Punjab-2011	14.8333	0.103333	35.3333	1.15333	11	0.0866667	31.6667	0.543333
131	Millat-2011	12.75	0.075	44	1.23	12.6667	0.0833333	30.8333	0.6
132	Dharrabi-11	14.9667	0.133333	37.6667	1.51333	13.3333	0.0933333	33.6667	0.9
133	NARC-2011	13	0.0766667	45.3333	1.77333	15.5	0.16	37	1.09
134	Nia-Sunder	10.3333	0.05	50.6667	1.40333	13	0.07	54	1.17
135	Nia-Sarang	14.4333	0.243333	40	2.06667	12.8333	0.1	39.6667	0.83
136	Benazir-13	12.8333	0.0766667	39.3333	1.03667	15.6667	0.0866667	36.3333	0.71
137	Shahkar-13	15.6667	0.0833333	41	1.48	13.5	0.16	36.6667	0.756667
138	Pirsbak-13	13.1667	0.0466667	36.6667	1.17	13.3333	0.08	36	0.833333
139	Hamal-Faqir	15	0.0833333	41	1.83333	9.5	0.09	34.5	0.675
140	Pakistan-2013	14.5	0.16	40	2.275	13.8333	0.18	36	0.906667
141	NIFA-Lilma	15.7333	0.113333	38.6667	2.14667	15.2667	0.216667	32.5	0.96
142	Galaxy-2013	14.8	0.126667	35	1.58	18.2667	0.156667	33.1	0.683333
143	Shalakot-13	14.3333	0.153333	46	1.31	12.6667	0.04	32.6667	0.633333
144	Umeed-2014	13.1667	0.12	36.3333	1.92	13.3333	0.0633333	39.6667	0.826667
145	Pakhtunkhawa	16.6667	0.0966667	36	0.49	13.1667	0.0633333	38	0.783333
146	Pirsabak-15	16	0.0633333	31.6667	0.666667	14.1667	0.05	35.3333	0.8
147	Ujala-15	12.6667	0.06	34.3333	0.836667	15.25	0.125	36	0.52
148	IBGE-GHane	13.1667	0.0733333	37.3333	1.38667	14.1667	0.113333	37	0.776667
149	NIFA-Insaf	14	0.09	38.3333	1.58667	14.5	0.095	37	0.865
150	Sindhu-16	15.3333	0.146667	38.6667	2.01333	13.8333	0.153333	39.3333	0.943333
151	Zincol	13.3333	0.136667	36.6667	1.57667	12.5	0.1	32.3333	0.71
152	Borlogue-16	18.1667	0.166667	39.3333	1.73667	13.1667	0.07	34	0.83
153	NIFA-Aman	13.1667	0.251667	49.3333	1.8	13.75	0.035	36	0.84
154	Gold-16	15	0.068	46	1.75	11.3333	0.05	39.3333	0.823333
155	Johar-16	9.93333	0.0366667	34.6667	1.18333	13	0.07	38.6667	0.8
156	Ihsan-16	13.75	0.046	41.5	1.615	12.1667	0.0366667	31.6667	0.58
157	Fatehjang-16	11.1667	0.0666667	38	1.57667	18.3333	0.146667	42.3333	0.886667
158	NN-Gandum	9.66667	0.04	37.6667	1.09667	15.1667	0.106667	40.3333	1
159	Wardan-17	12.5	0.1	40	1.75333	14.5	0.145	42	1.3
160	Pasina-17	11	0.0753333	32.6667	1.38667	12.6667	0.123333	40.3333	1.02
161	Khaista-17	12	0.08	38.6667	1.50667	12.1667	0.07	34.6667	0.666667
162	Israr Shaheed	12	0.0883333	42	1.79	13.1667	0.09	34	0.896667
163	Shahid-17	10.6667	0.186667	40.6667	1.54	11.3333	0.0833333	38	0.813333
164	Kohat-17	12.6667	0.103333	43.3333	2.10333	14	0.106667	39.3333	1.31
165	Anaj-2017	11.1667	0.04	33.6667	1.14	11	0.0466667	38	0.7
166	Fakhar-e-Bhakkar	12.5	0.0416667	38	1.59333	13.1667	0.14	38.5	1.22
167	Barani-17	11.1667	0.0366667	42	1.22667	14.5	0.0666667	37	0.556667
168	Bhakkar Star	10	0.0426667	37.6667	1.28667	12.1667	0.0866667	38.6667	0.686667
169	Markaz-2019	12.5	0.07	43.5	1.965	16.3333	0.113333	33.3333	0.54
170	NIFA-Awaz	12.6667	0.0833333	41.6667	1.31667	13.6667	0.0933333	39	0.523333
171	Faheem-19	17.4333	0.0516667	33	0.883333	15.6667	0.166667	34	0.833333
172	Ghazi-2019	13.3333	0.08	34.6667	0.84	12.25	0.195	36	1.26
173	NIA-zarkosz	10	0.0533333	38	1.22	15.6667	0.0866667	38	0.613333
174	NIA-Shaheen	11	0.065	42.5	2.05	12.5	0.07	39.5	0.625
175	Akber-19	15.6667	0.0533333	39	0.81	13.3333	0.0266667	36	0.603333
176	Gulzar	13.5	0.0833333	40	1.25333	13	0.04	38.6667	0.626667
177	Pirsbaq-19	17	0.0725	38.5	0.85	11.5	0.03	35.8333	0.356667
178	Aggaz	15	0.0566667	32.3333	0.683333	15.1667	0.0366667	39.1667	0.5
179	Khoshur	12.3333	0.085	38.6667	1.56333	12.8	0.0366667	33.3333	1.05
180	AZRC	12.75	0.06	41	1.645	7	0.01	29	0.465
181	Umeed e Khas	15.6667	0.08	35.3333	1.07667	13.8333	0.08	33.6667	0.73
182	Pirsbaq-21	14.3333	0.0766667	33	0.913333	13	0.04	30	0.835
183	Akbar-21	16.3333	0.166667	39.6667	2.5	14.6667	0.0666667	37.3333	0.626667
184	Zargoun-21	13.25	0.11	39	1.9	14.3333	0.11	39.6667	0.716667
185	NARC	12.1667	0.08	42.6667	1.73667	9.5	0.03	42	0.9
186	SWB-1	13	0.08	45	1.59667	12.5	0.0433333	36.3333	0.87
187	MA-2021	11	0.0533333	40	1.65	11.6667	0.0633333	30.3333	0.576667
188	Nisnan-21	9.33333	0.06	40.6667	1.34667	13.1667	0.06	26.1667	0.47
189	Subhani	15.6667	0.105333	33.3333	1.28	14.6667	0.11	29	0.356667
190	Dilkash	11.5	0.085	26	0.82	15.5	0.04	32.3333	0.443333
191	MIH-21	14.8333	0.113333	30.6667	0.873333	14.3333	0.08	28	0.69
192	Nawab-21	15	0.113333	33.3333	1.07667	16.6667	0.0866667	30.3333	0.806667
193	Saddiq-21	19.6667	0.266667	34.6667	1.46333	13.5	0.0933333	37.6667	1.15
194	Sarab-92	14.8333	0.0833333	32	0.77	12.5	0.05	34.3333	0.89
